# Supplementary material for: DNA Copy Number Changes in Human Malignant Fibrous Histiocytomas by Array Comparative Genomic Hybridisation
Source: PubMed Central journal article supplement (PMC2976768; doi:10.1371/journal.pone.0015378), 2010-11-09

### MFH1

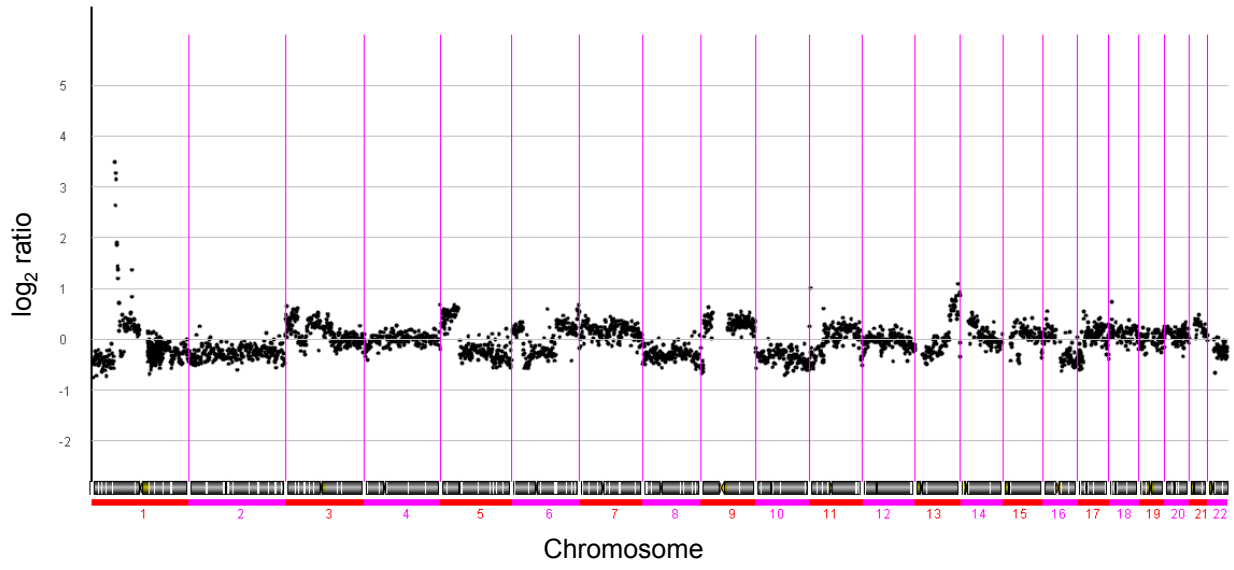

### MFH2x

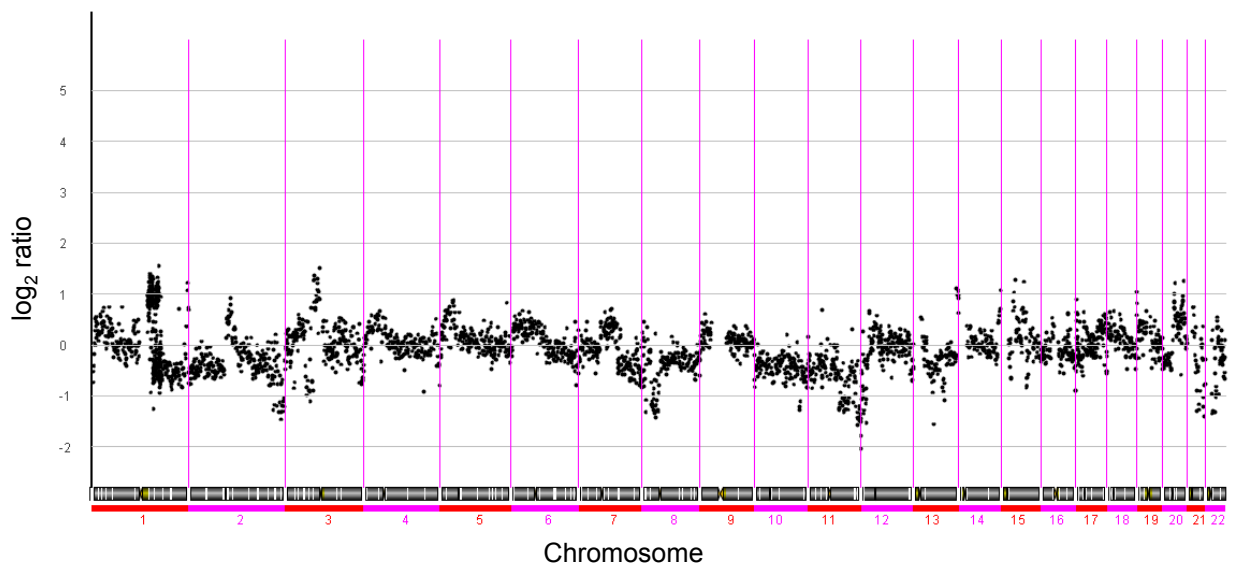

### MFH4

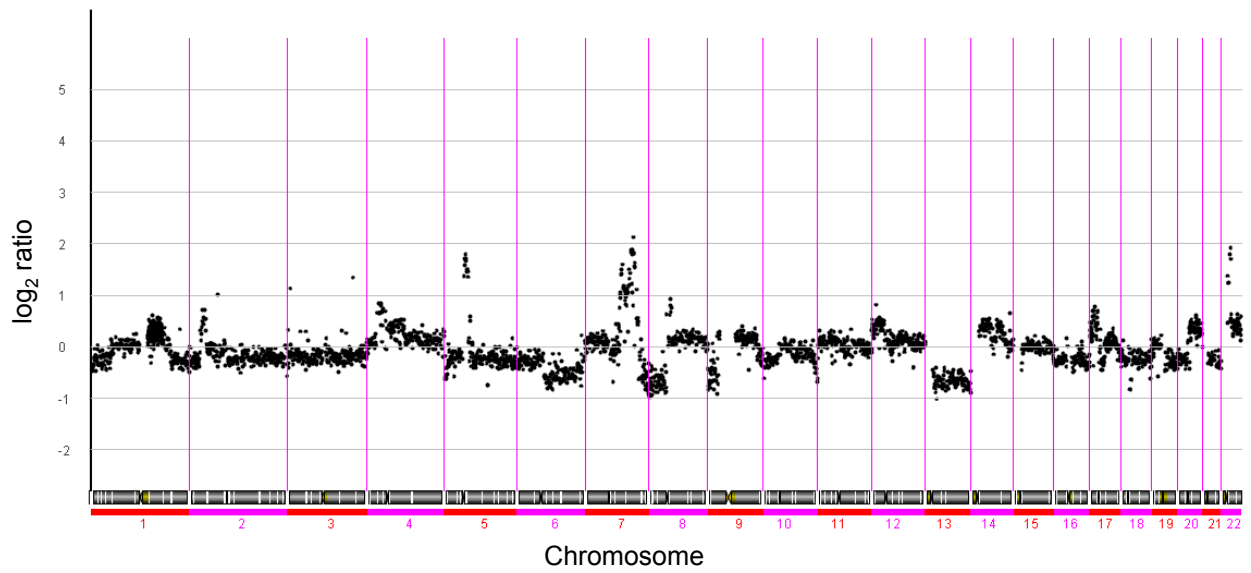

### MFH7

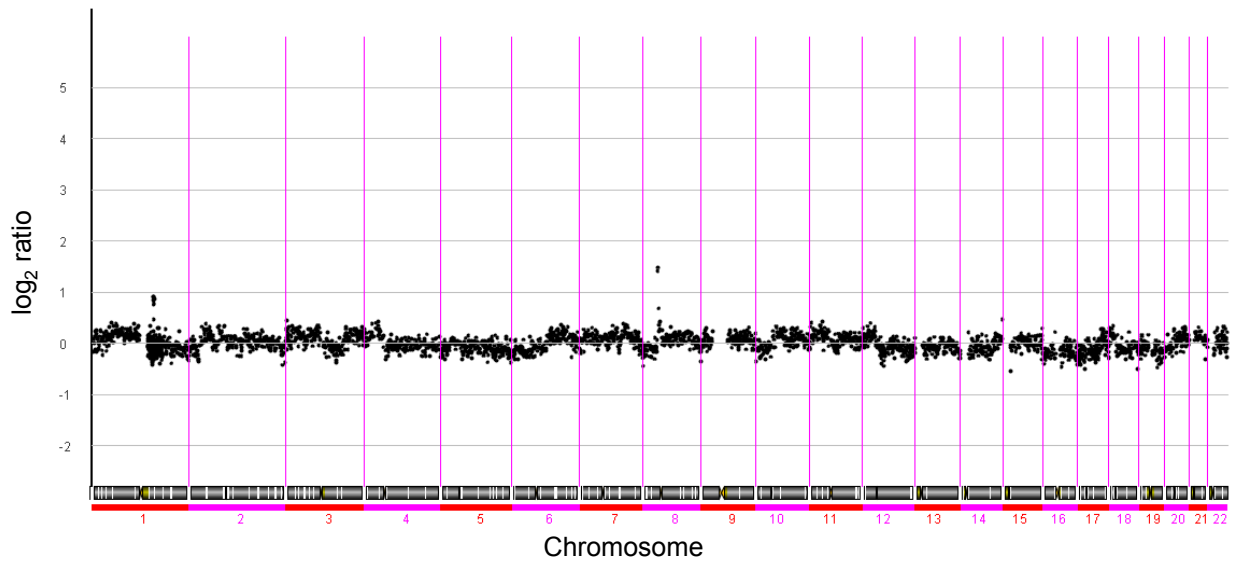

### MFH8

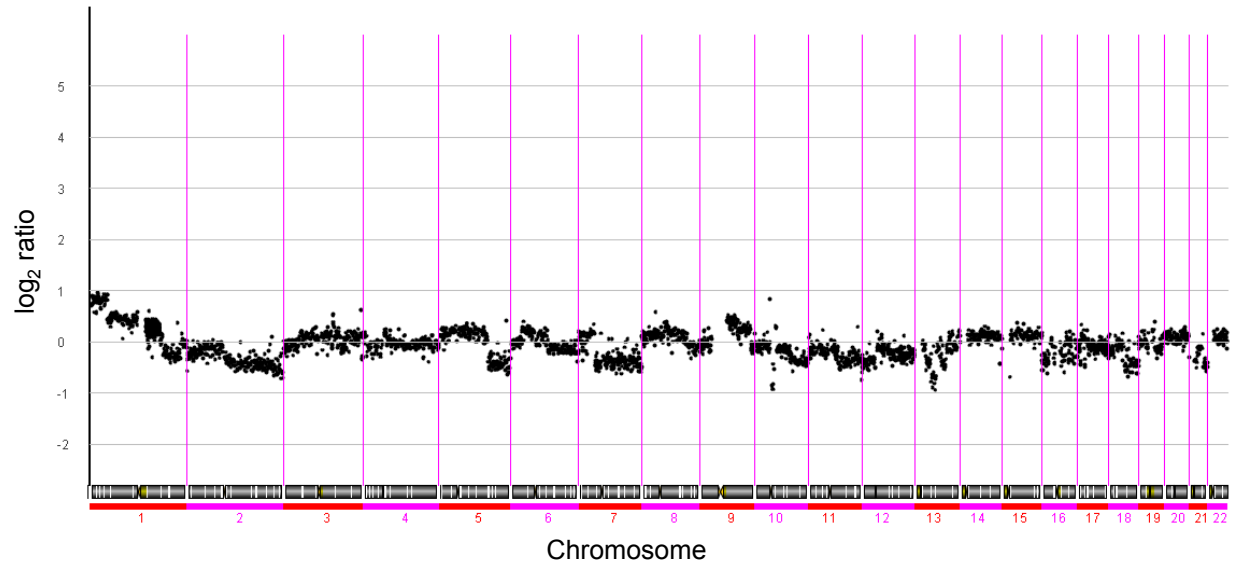

### MFH9

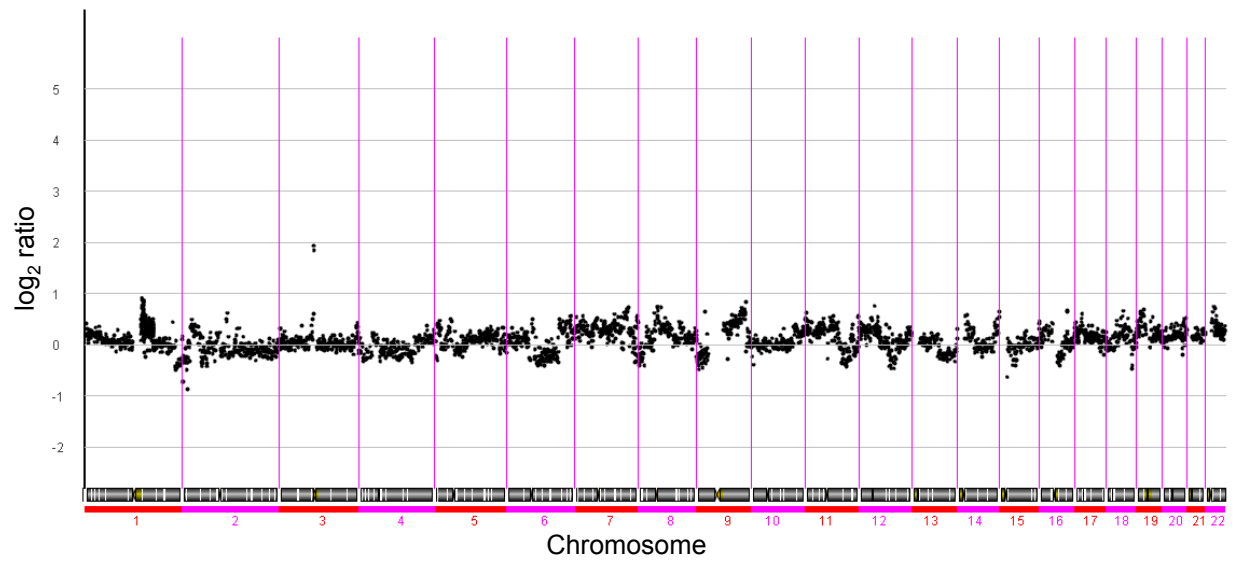

### MFH14

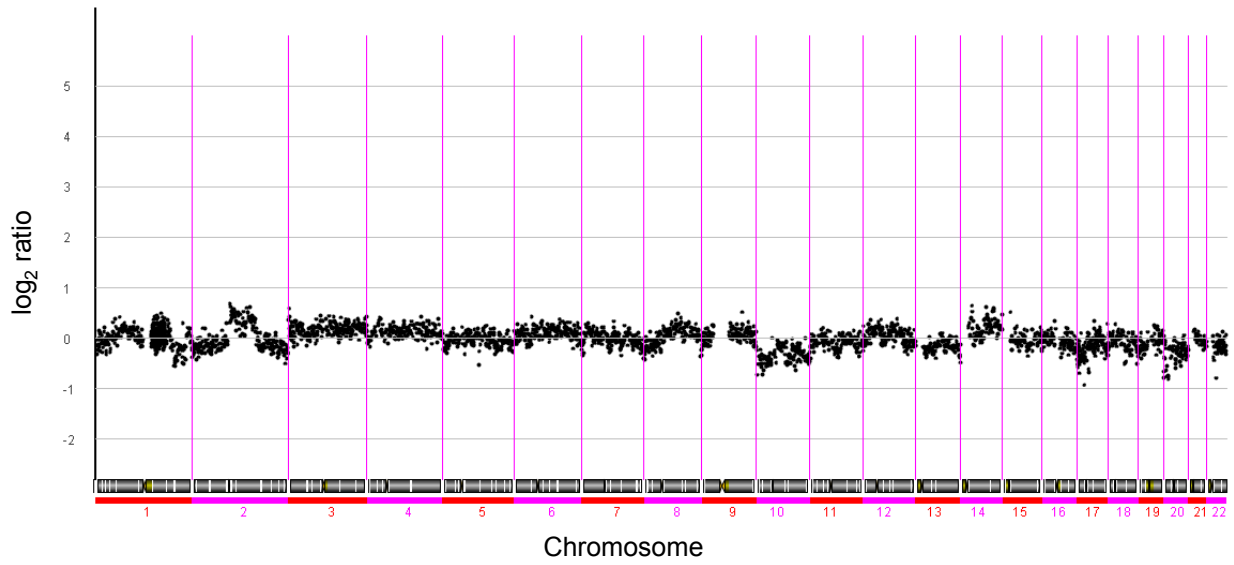

### MFH15

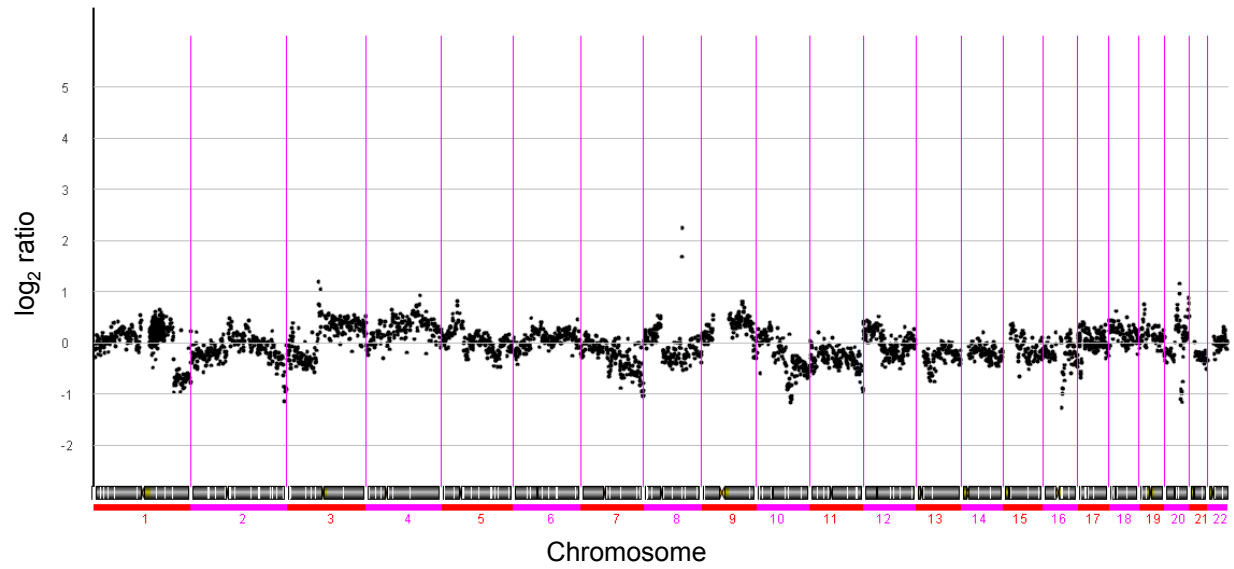

### MFH16

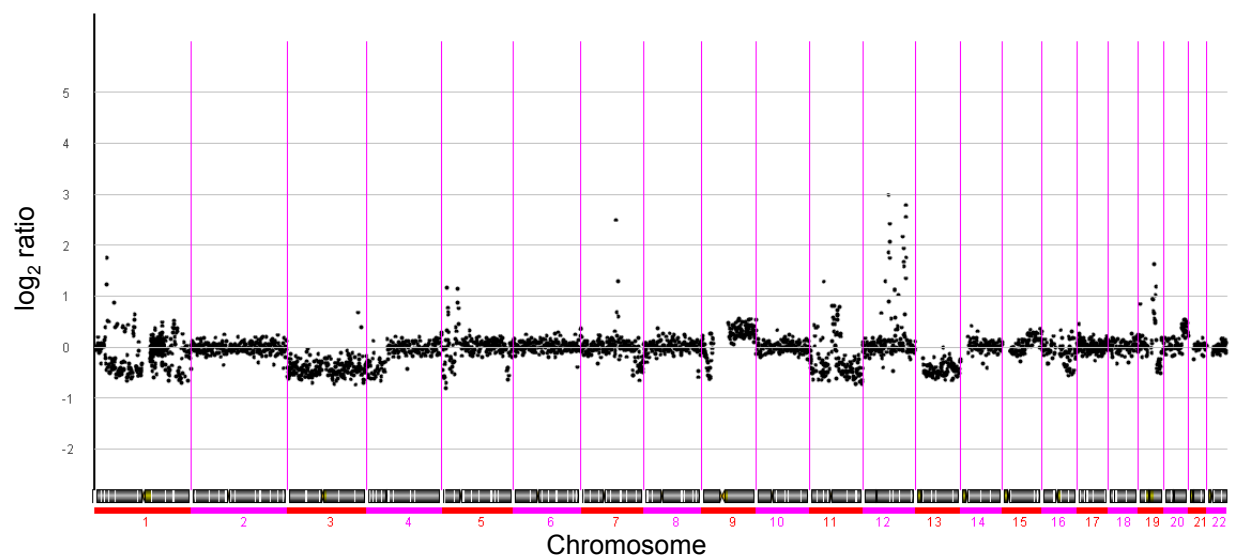

### MFH18

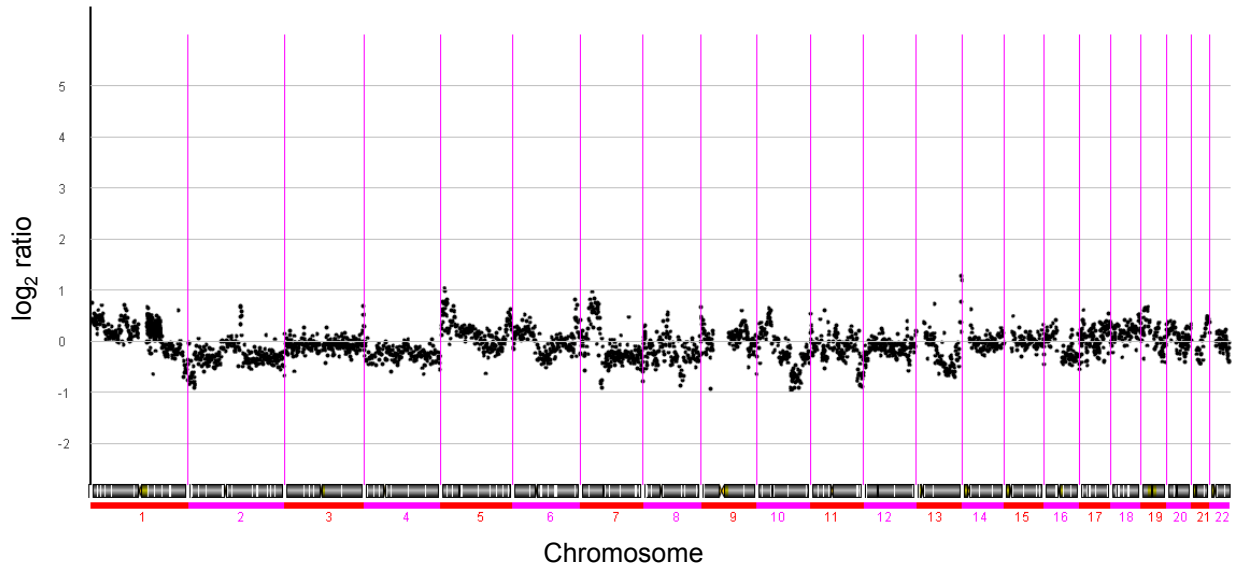

### MFH19

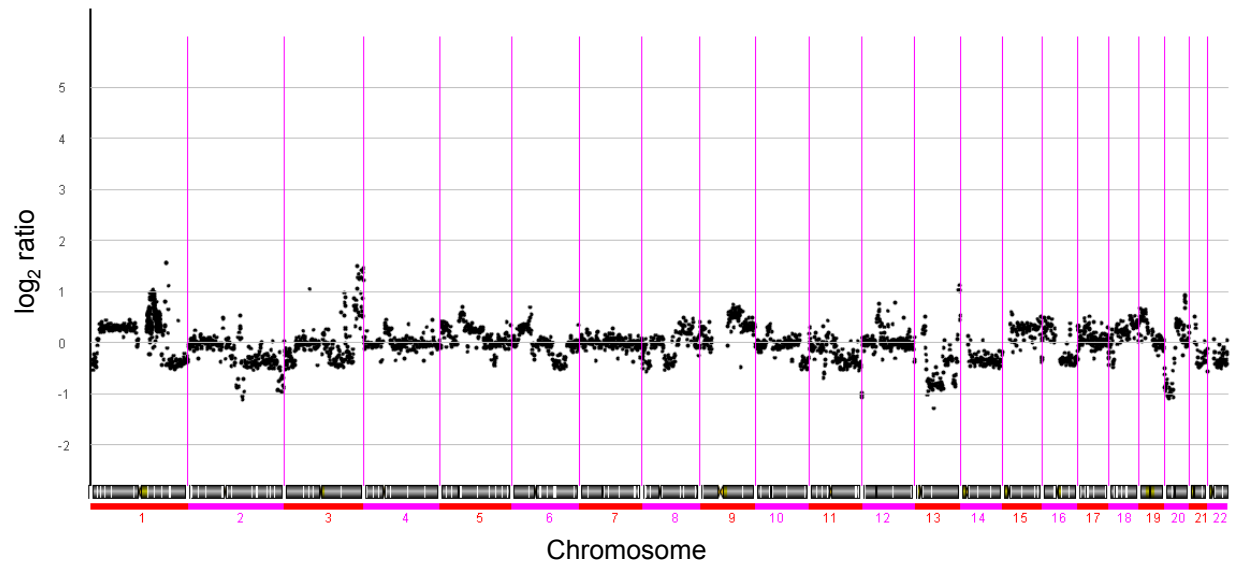

### MFH20

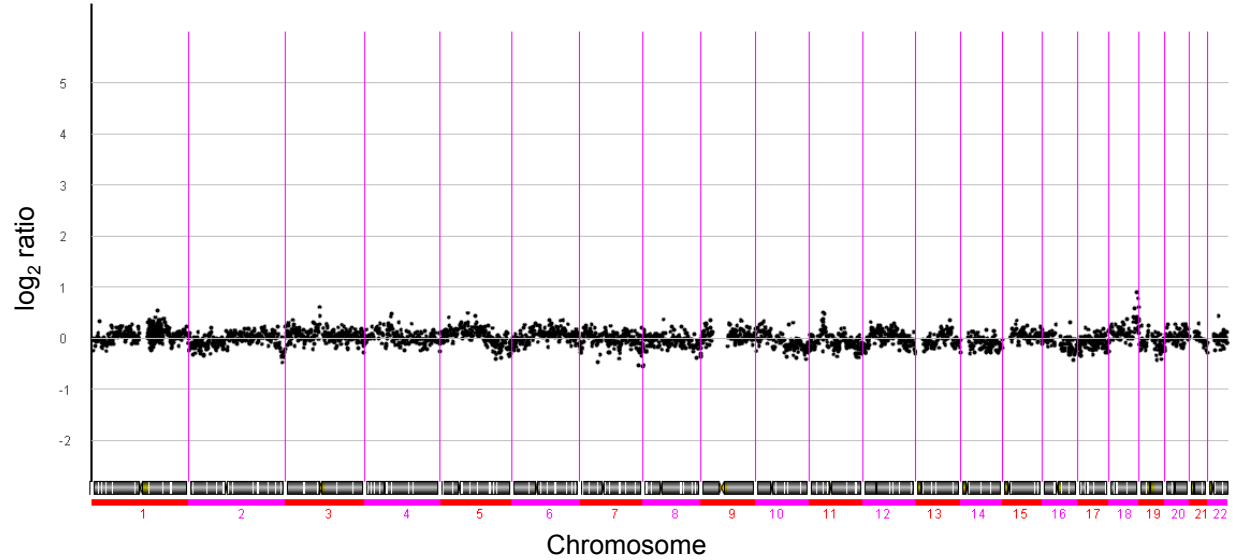

### MFH21

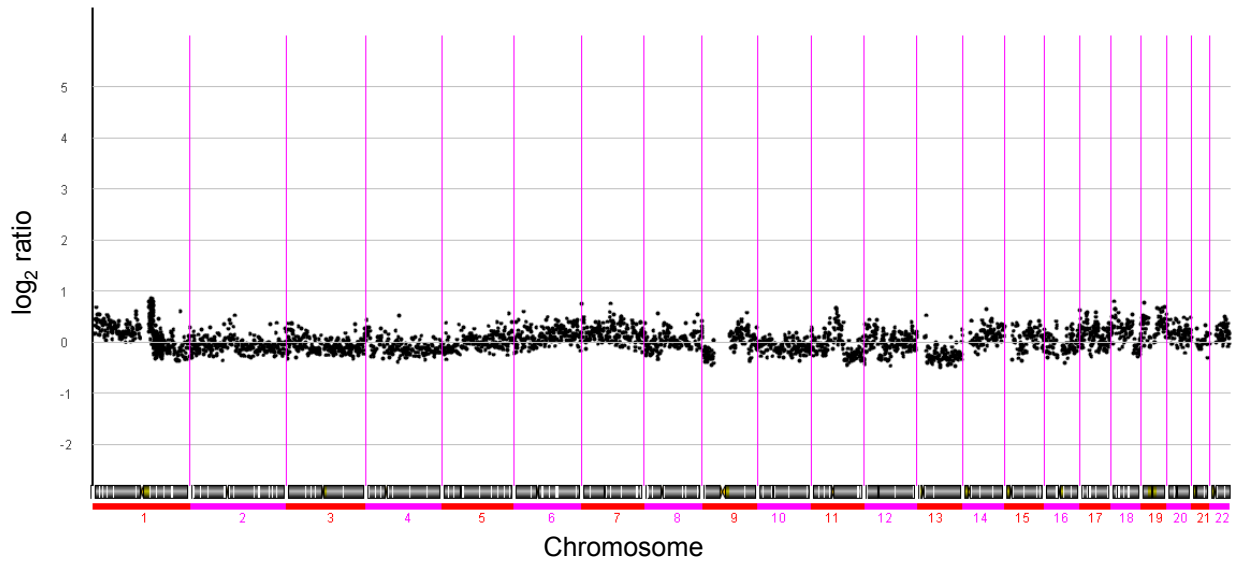

### MFH24

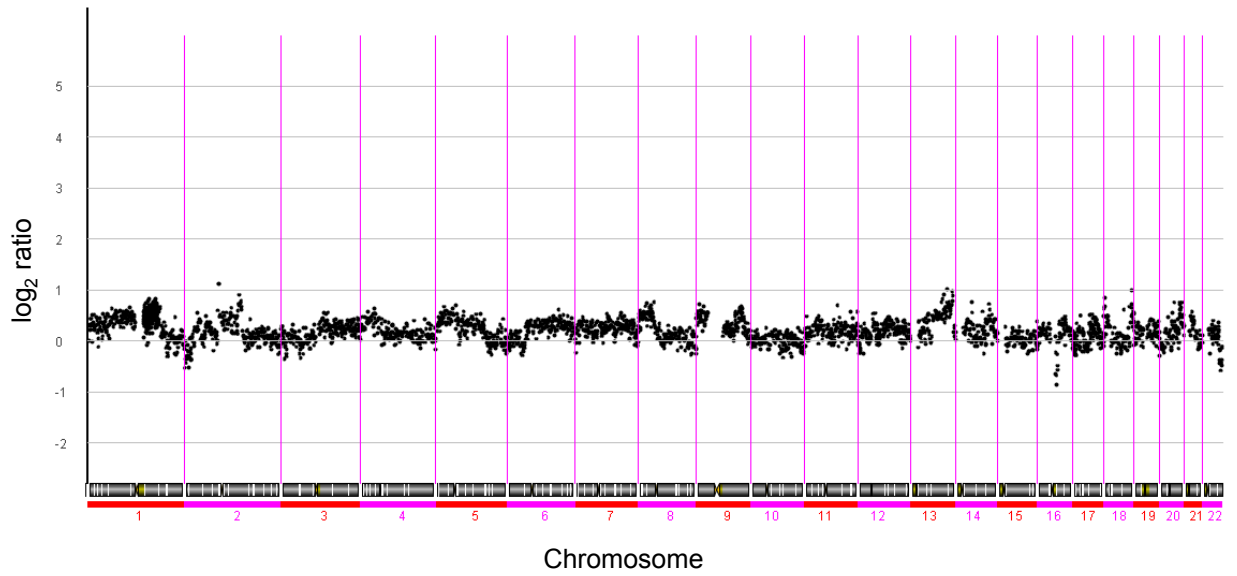

### MFH25

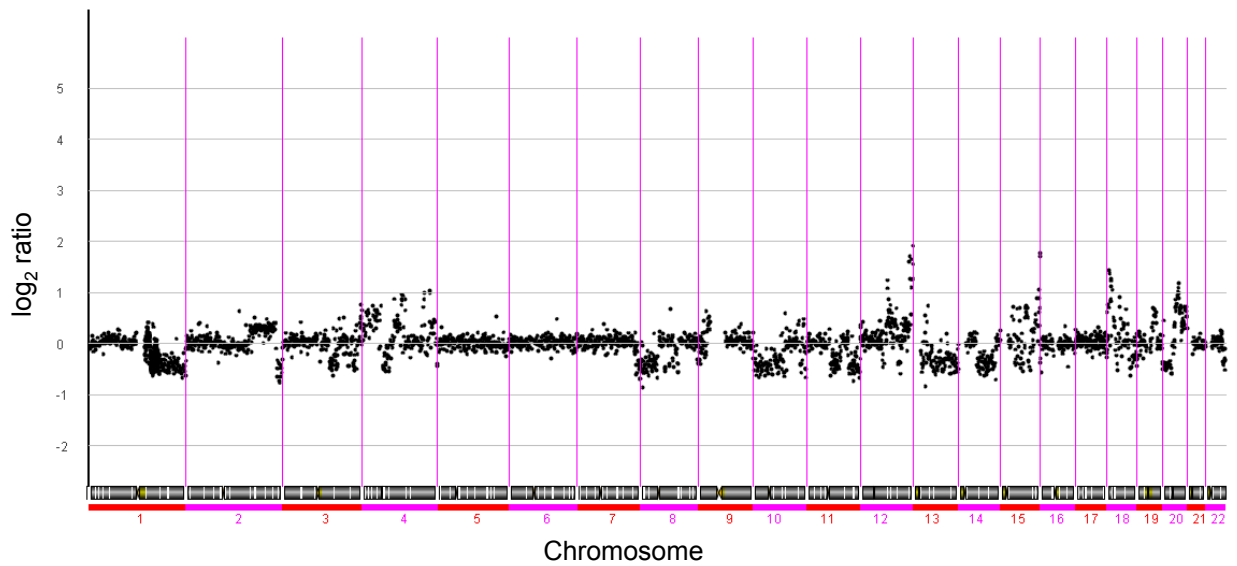

### MFH27

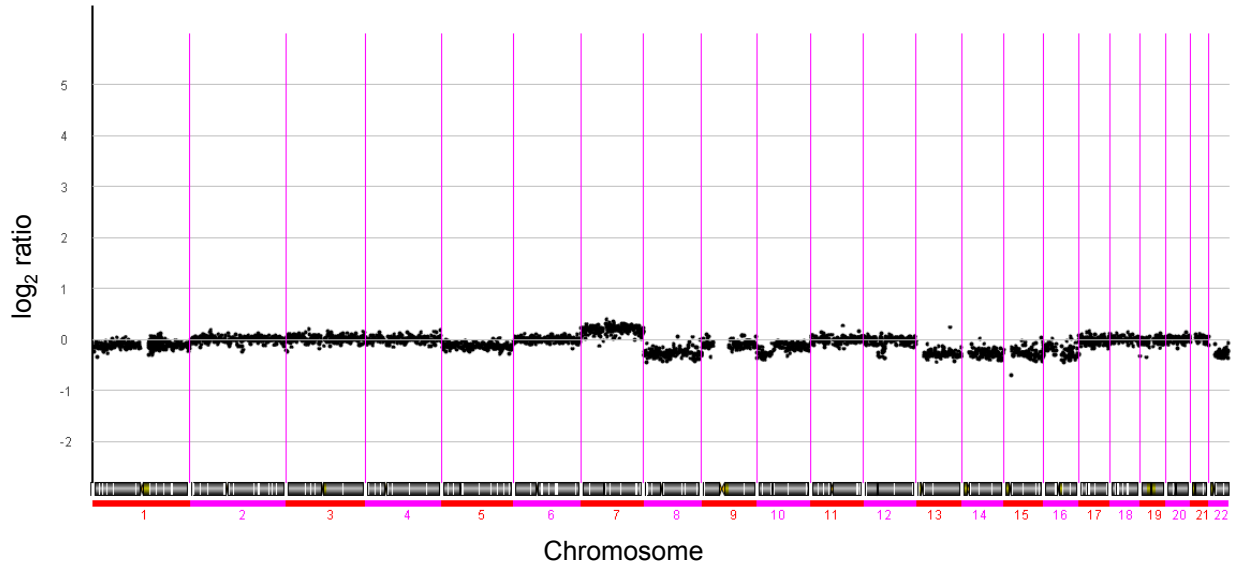

### MFH30

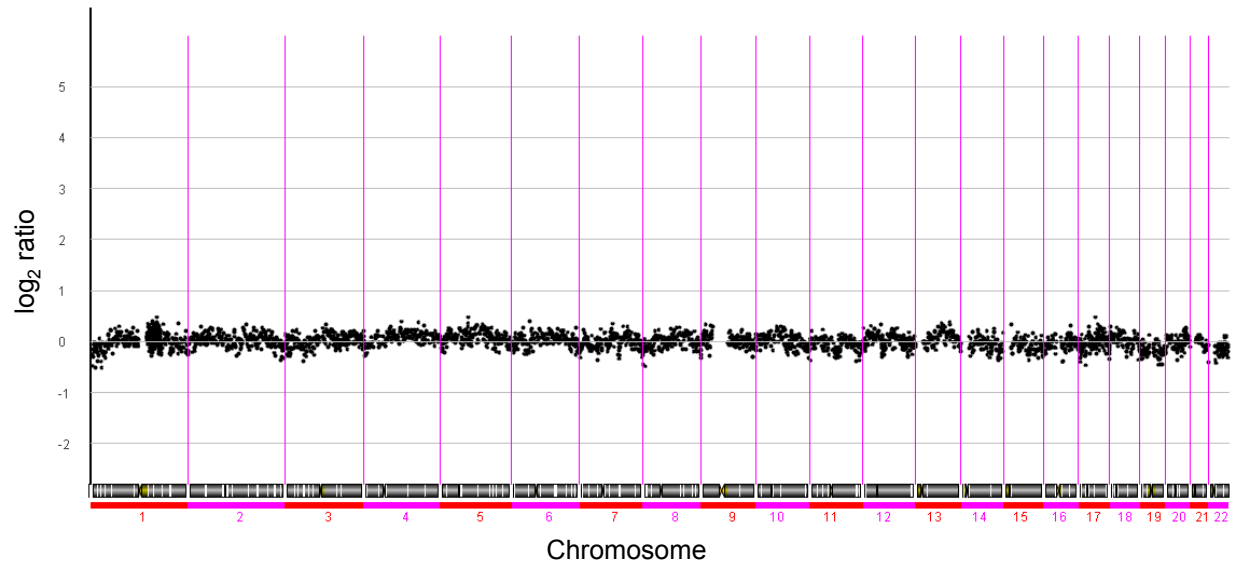

### MFH34

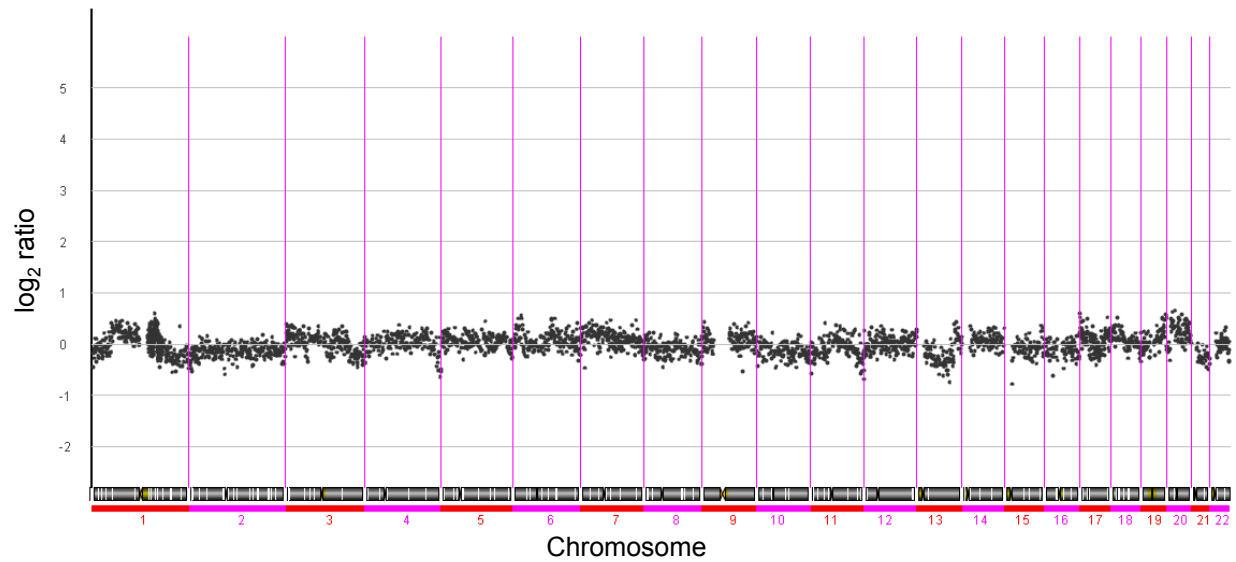

### MFH36

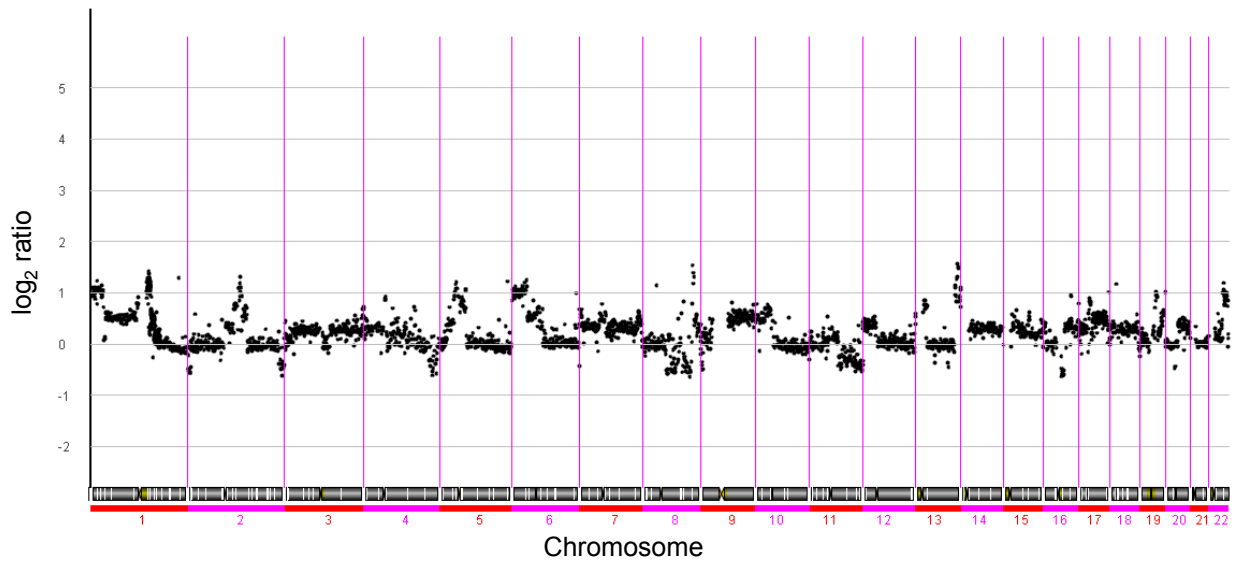

### MFH42

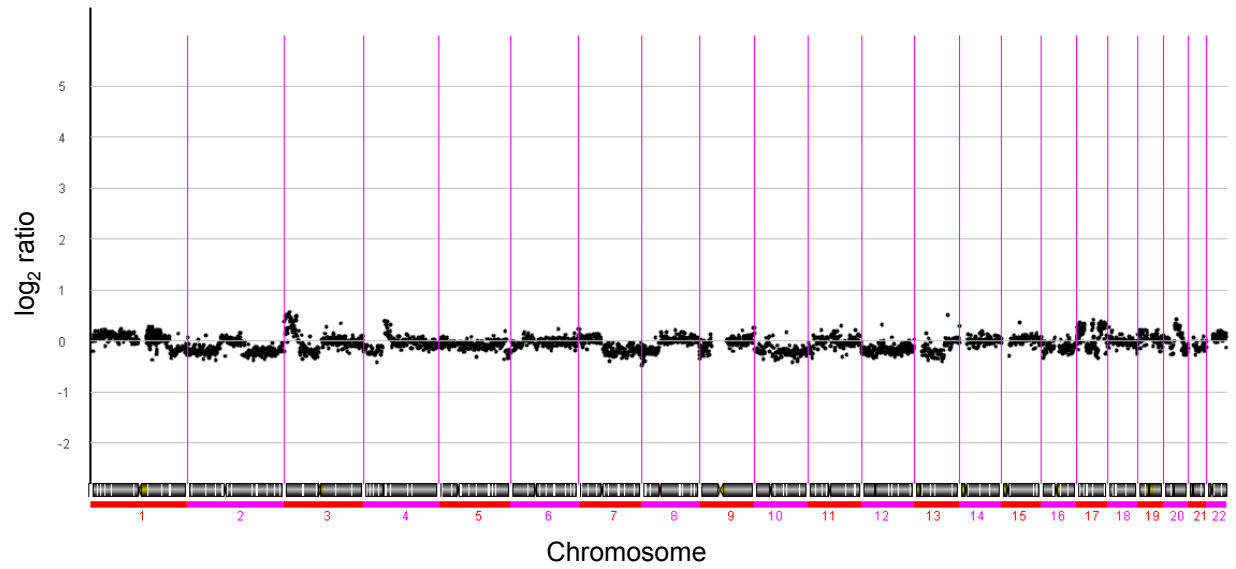

### MFH44

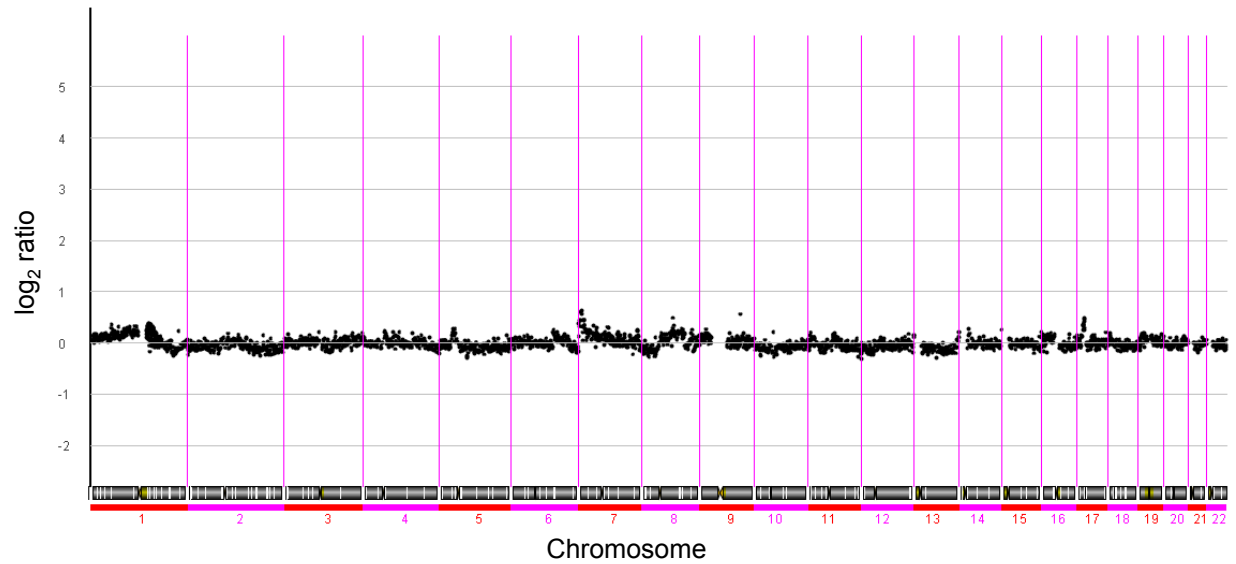

### MFH45

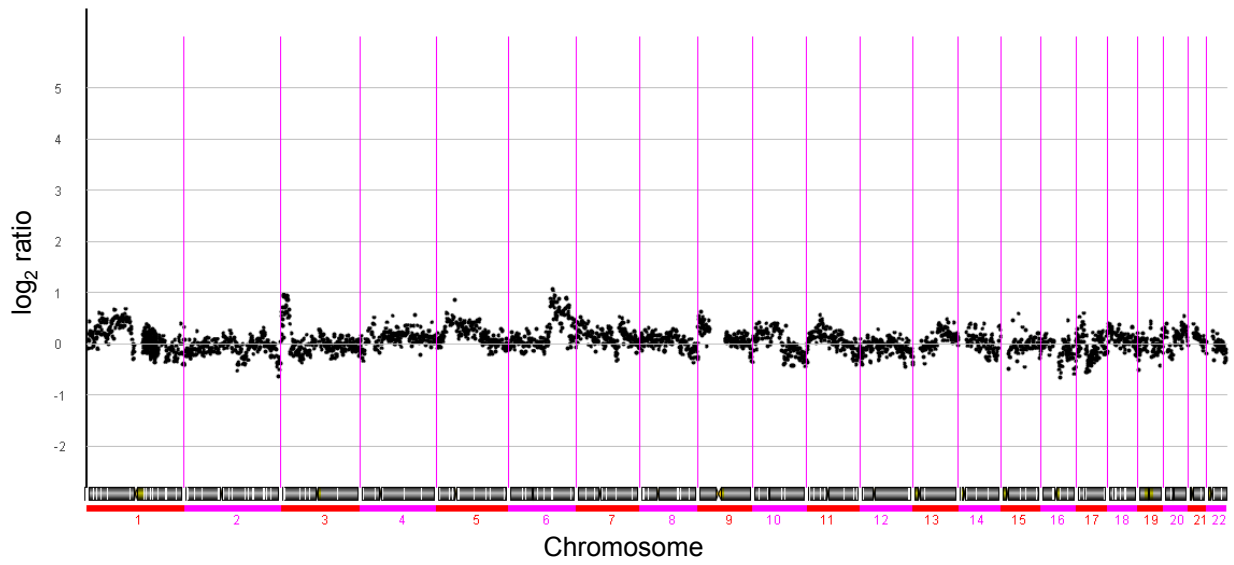

### MFH46

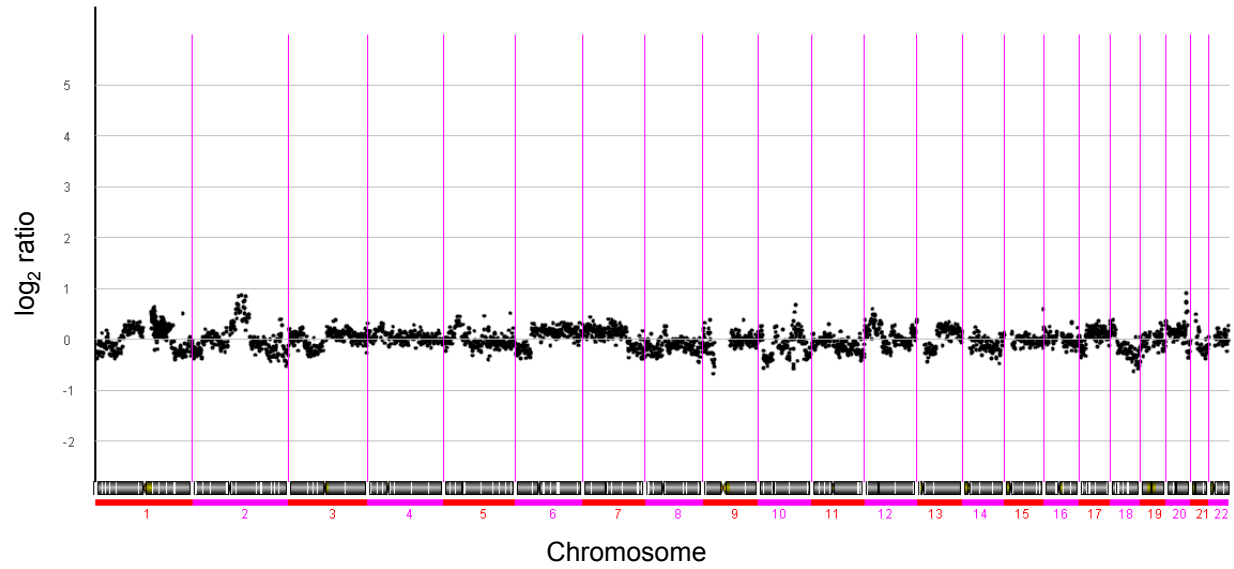

### MFH47

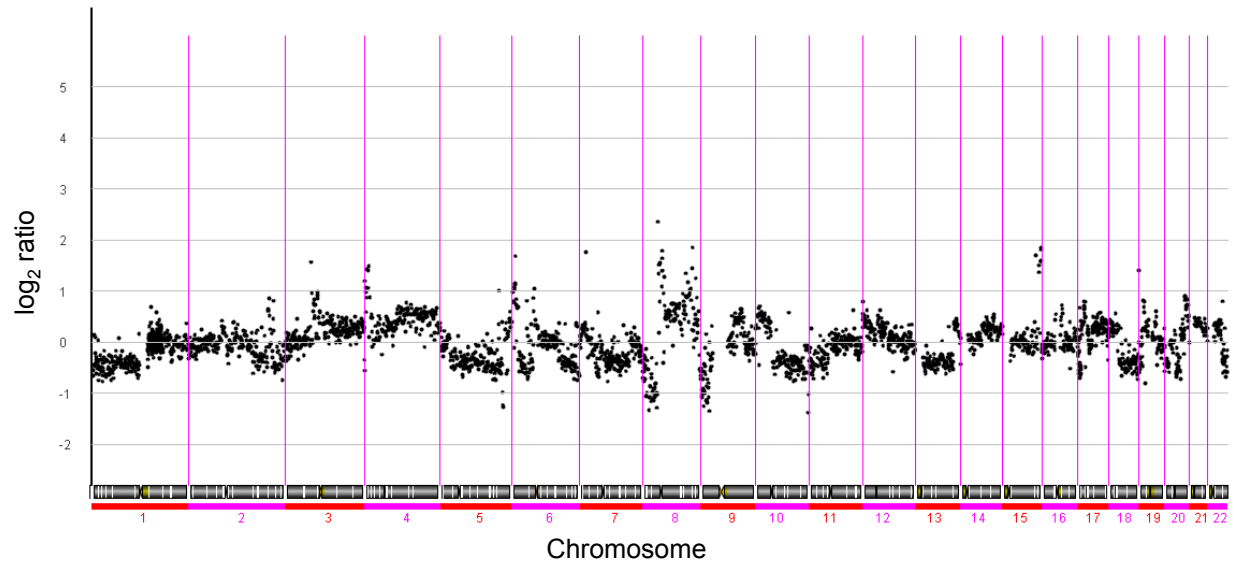



### MFH48

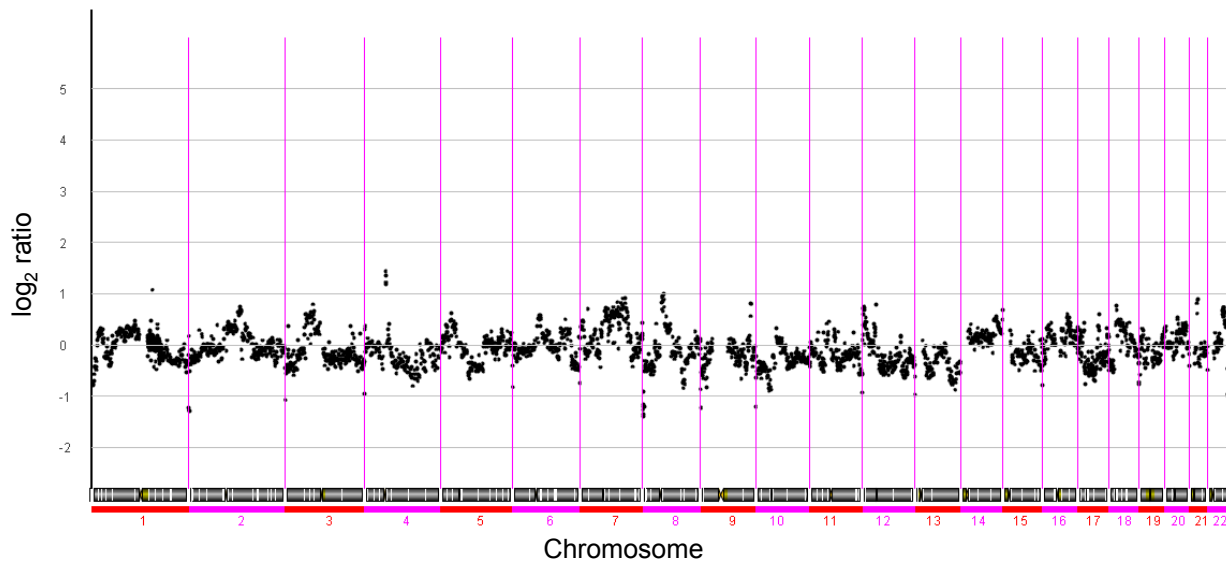

### MFH53

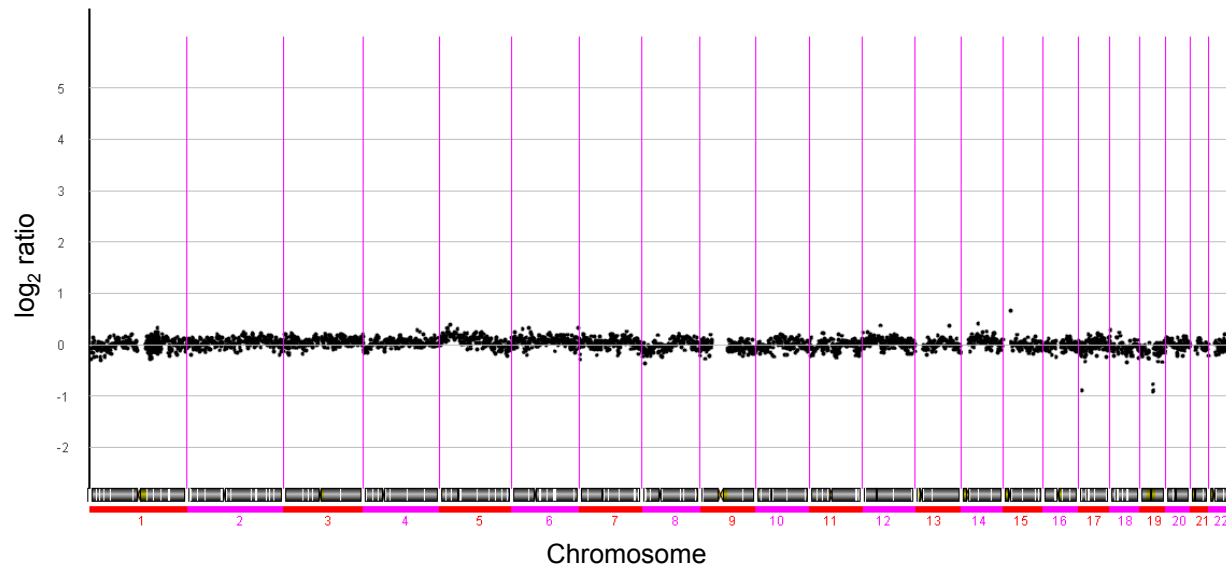

### MFH54

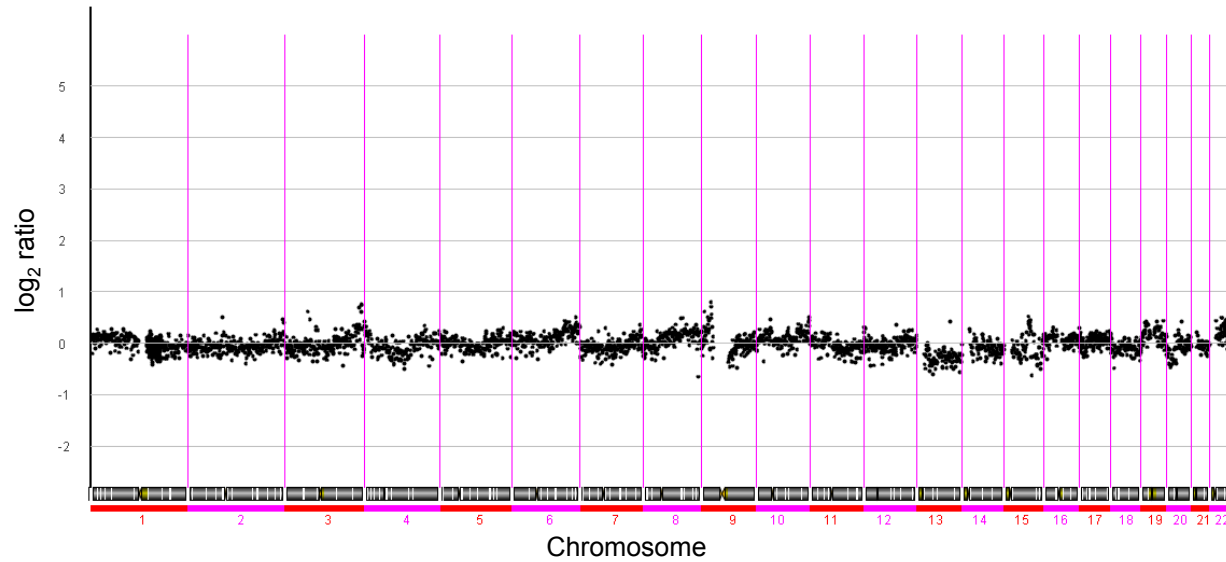

### MFH56

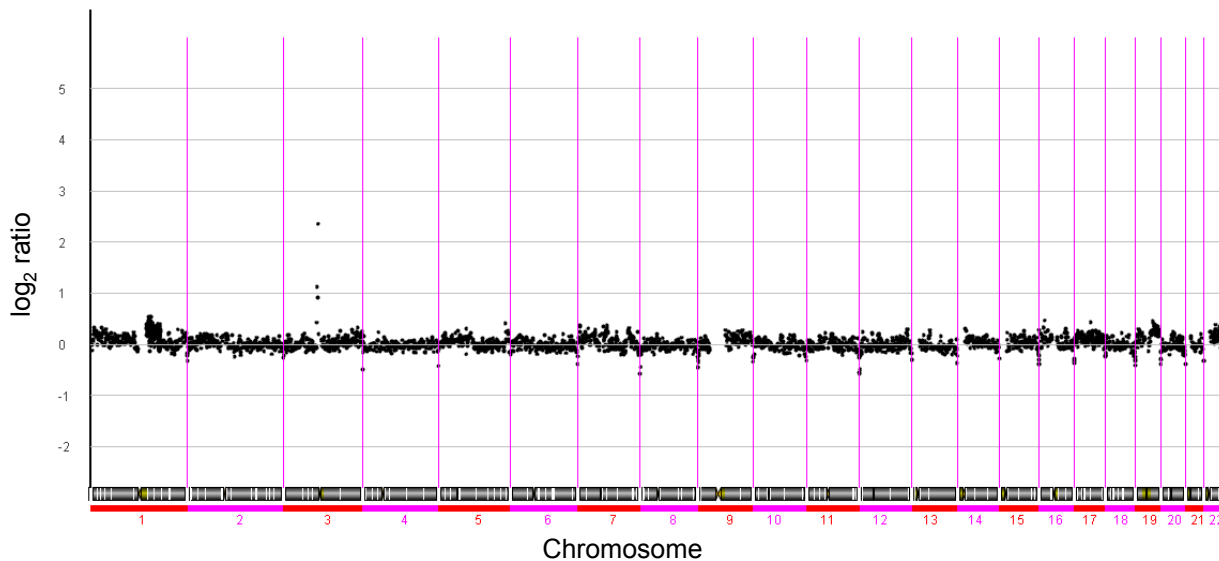

### MFH59

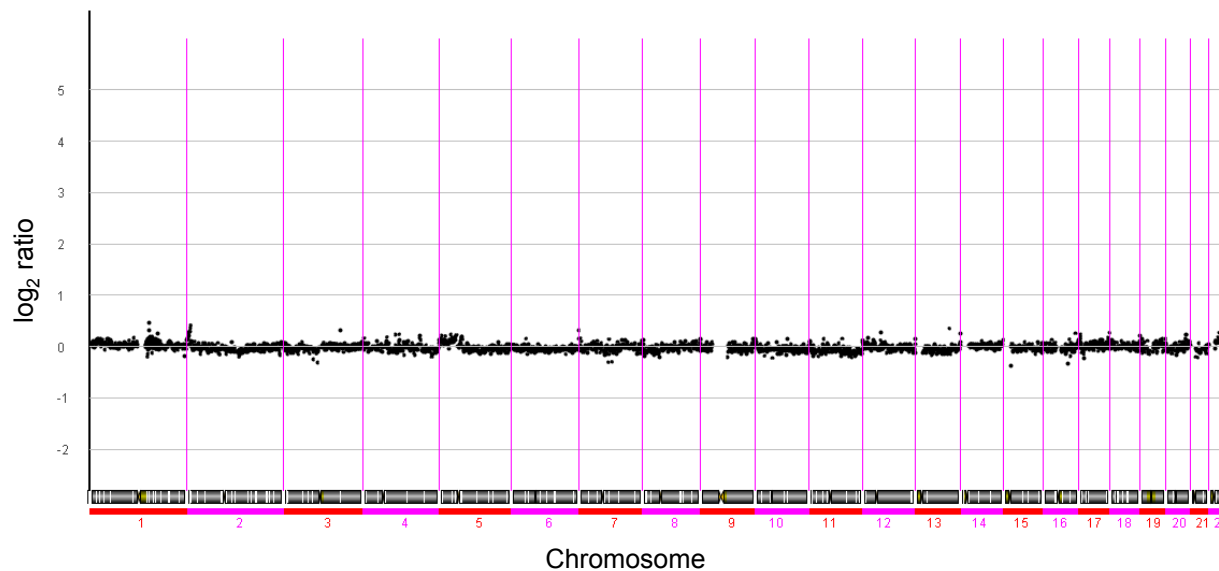

### MFH60

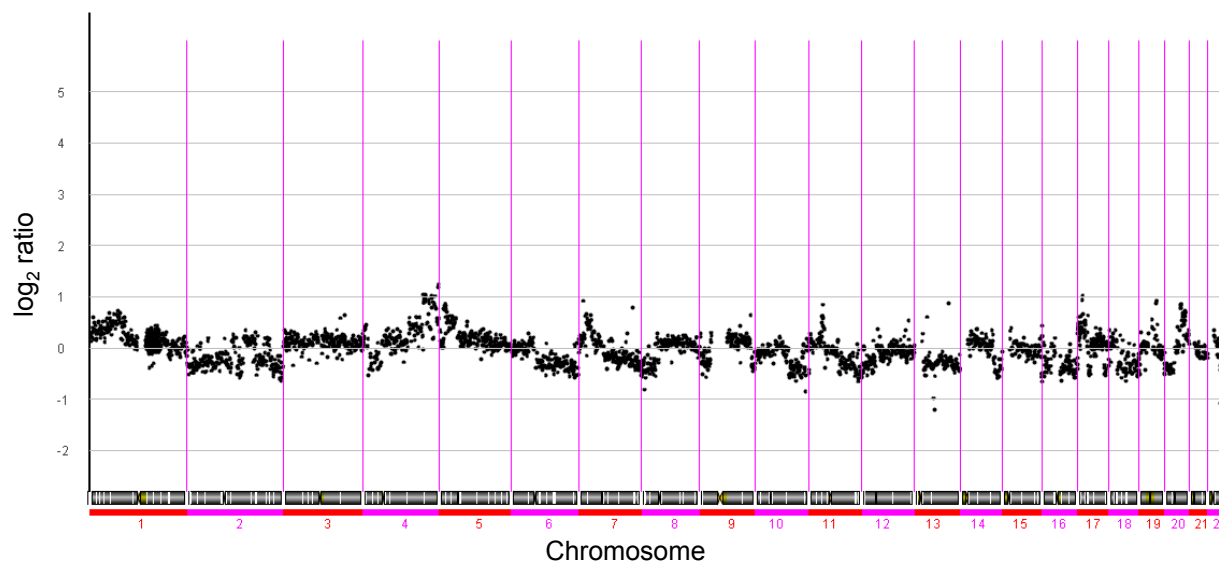

### MFH61

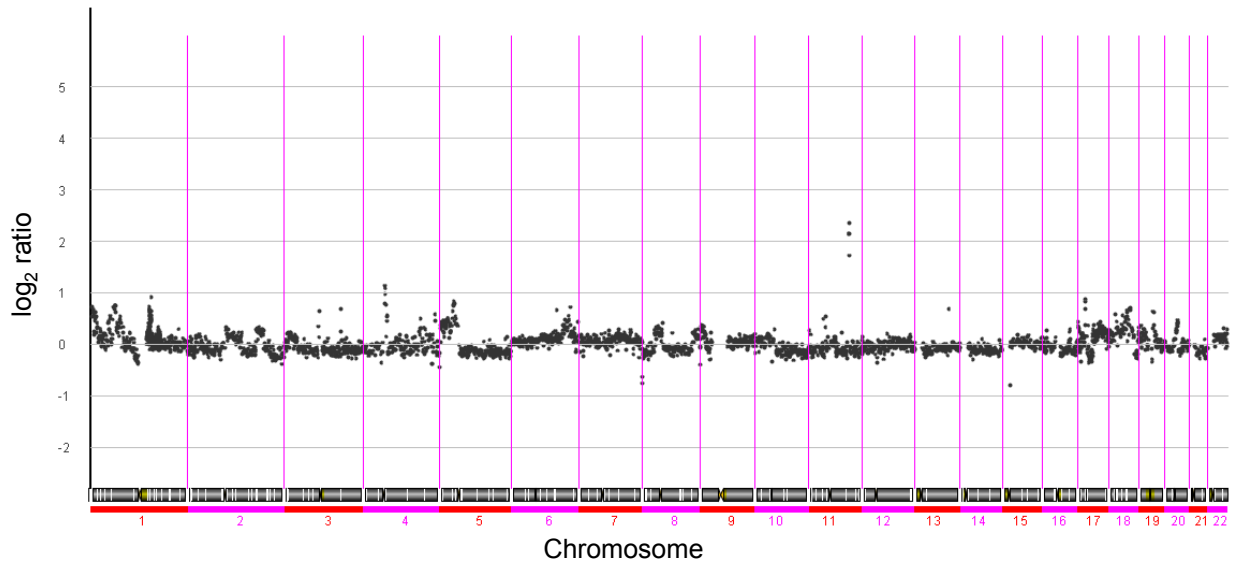

### MFH73x

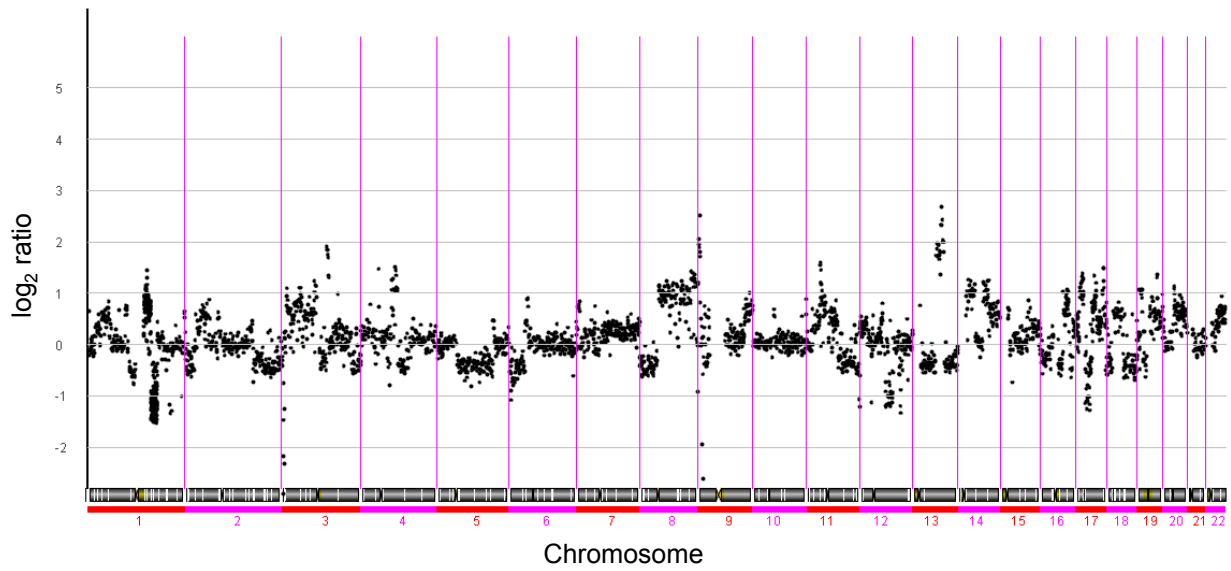

### MFH76x

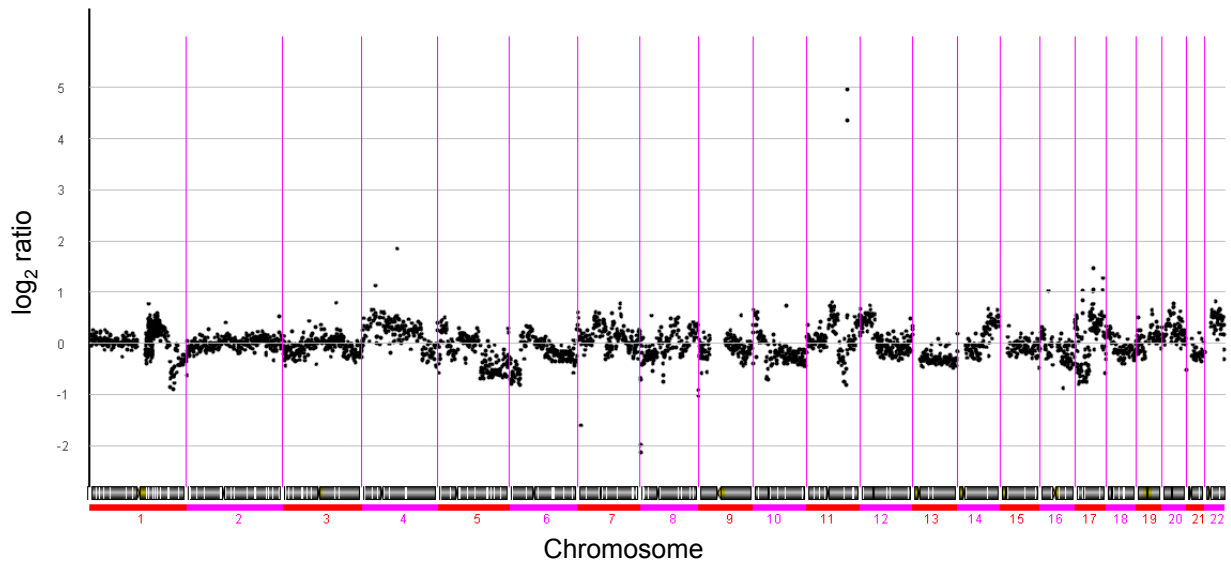

Supplement: pone.0015378.s001.pdf [file pone.0015378.s001.pdf]
