# Supplementary material for: DNA Copy Number Changes in Human Malignant Fibrous Histiocytomas by Array Comparative Genomic Hybridisation
Source: PLoS One. 2010 Nov 9;5(11):e15378. doi: 10.1371/journal.pone.0015378 (PMC2976768; doi:10.1371/journal.pone.0015378)
Supplement: Table S1 — Identification of minimal recurrent regions in malignant fibrous histiocytomas using ACE (FDR = 0.0001 and medium sensitivity). Orange areas indicate increased DNA copy number detected by ACE and green areas decreased DNA copy number; Bold numbers indicate high-level amplification (log2>1) or homozygous deletion (<−1); Red triangles indicate missing values imputed via a K-Nearest Neighbor algorithm normalization using SAM; Recurrent regions are defined in light grey (≥30%) and grey (≥50%) and minimal recurrent regions in black frames. (XLS) [file pone.0015378.s003.xls]

## Sheet: ACE MFH
																																						Recurrent regions
CloneID	Chromosome	Start position (bp)	End position (bp)	MFH01	MFH02x	MFH04	MFH07	MFH08	MFH09	MFH14	MFH15	MFH16	MFH18	MFH19	MFH20	MFH21	MFH24	MFH25	MFH27	MFH30	MFH34	MFH36	MFH42	MFH44	MFH45	MFH46	MFH47	MFH48	MFH53	MFH54	MFH56	MFH59	MFH60	MFH61	MFH73x	MFH76x		# gain	# loss	Size (Mb)	Chromosome arm
RP4-785P20	1	3247818	3388389	-0.751985	-0.737993	-0.475522	-0.161249	0.736588	0.416122	-0.310499	-0.272041	-0.016701	0.756475	-0.415568	-0.242705	0.451804	0.009072	-0.110469	-0.238264	-0.47577	-0.450006	0.934497	0.005001	0.141469	-0.086936	-0.369742	-0.65863	-0.794262	-0.285181	0.106184	-0.12322	0.058941	0.129091	0.732957	0.656223	0.174221		7	9
RP1-37J18	1	4487200	4618626	-0.467555	-0.527267	-0.40997	0.014964	0.709246	0.206821	-0.148611	-0.124263	-0.04378	0.442253	-0.429179	0.005424	0.15498	0.3024	-0.042011	-0.153244	-0.254357	-0.184485	0.989903	-0.011096	0.038614	0.094568	-0.235604	-0.551858	-0.756576	-0.084465	-0.197888	-0.008236	0.03804	0.26185	0.542658	-0.208016	-0.052388		8	8
RP11-49J3	1	5877818	6054509	-0.405199	-0.418172	-0.327996	0.086441	0.722428	0.315013	-0.030159	-0.014675	-0.066542	0.392703	-0.536203	-0.019415	0.325119	0.328021	-0.058435	-0.136427	-0.157094	-0.08873	0.951099	-0.19747	0.070452	0.198114	-0.241393	-0.434632	-0.705656	-0.062965	0.069722	0.08908	0.050694	0.314678	0.624071	-0.126196	0.139056		9	8
RP3-438L4	1	7071572	7158671	-0.491477	-0.183505	-0.37373	-0.005184	0.896813	0.17199	-0.226729	-0.114279	0.024482	0.405748	-0.332149	-0.0372262	0.175463	0.218821	-0.035033	-0.152668	-0.299763	-0.274633	1.10757	0.010249	0.038448	0.0590841	-0.278491	0.146508	-0.569694	-0.16052	0.168116	0.058786	0.080894	0.201099	0.679169	-0.132321	0.061797		9	8
RP11-338N10	1	7653186	7719107	-0.350525	0.04176	-0.21067	0.133137	0.759471	0.184891	-0.12876	0.155917	-0.019304	0.361117	-0.391085	-0.0275907	0.324075	0.432743	0.01	-0.085123	-0.060544	-0.153884	1.07048	0.109395	0.125492	0.435855	-0.091441	-0.468194	-0.416786	0.028142	0.126773	0.191265	0.006805	0.398071	0.577284	-0.063508	-0.022193		12	7
RP11-484P7	1	9095616	9096340	-0.413006	-0.001479	-0.264995	-0.119298	0.881875	0.028545	-0.163154	0.048672	0.190684	0.326584	-0.341446	-0.149429	0.465034	0.224288	0.053958	-0.099904	-0.205599	-0.153736	1.04393	0.07361	0.136726	0.174332	-0.309962	0.0943824	-0.440998	-0.167455	0.007865	0.188841	0.078791	0.311404	0.188729	-0.071159	0.041481		12	7
RP3-510D11	1	9146801	9275949	-0.484712	0.276436	-0.22561	0.139548	0.8562	0.230502	0.003263	-0.007305	0.018356	0.542302	-0.442212	-0.042156	0.680705	0.290032	-0.050808	-0.157417	-0.170512	-0.034844	1.01259	0.040678	0.168561	0.181636	-0.104012	-0.423225	-0.420456	-0.048804	0.108819	0.258789	0.105972	0.316509	0.248153	0.022353	0.263262		13	7
RP4-575L21	1	10087261	10181682	-0.240333	0.51308	-0.037514	0.238596	0.864618	0.09679	0.15563	0.135043	0.073259	0.359021	-0.232681	-0.0296572	0.435177	0.435608	0.15612	-0.036033	-0.010165	0.105113	1.00202	0.120874	0.001169	0.247515	-0.044809	-0.21366	-0.261374	0.135674	0.089183	0.328392	0.085795	0.601521	0.551231	0.097911	0.167924		13	7
RP4-635E18	1	10997976	11110744	-0.327965	0.368806	-0.161527	0.134096	0.780343	0.123486	-0.011418	0.058118	0.038039	0.31157	-0.291989	0.00588	0.392481	0.332315	0.073267	-0.12016	-0.102881	-0.042812	0.912091	0.0999752	0.056602	0.204436	-0.088226	-0.343128	-0.275388	0.050822	0.120706	0.196842	0.087259	0.370405	0.459204	0.073239	0.086215		13	7
RP4-539L13	1	11494886	11630670	-0.714375	0.135114	-0.471389	-0.163096	0.577032	0.294454	-0.249109	-0.223107	-0.05436	0.426772	-0.45698	-0.0730171	0.289146	-0.018326	-0.15523	-0.336494	-0.512076	-0.342269	0.997591	-0.001123	0.156532	-0.080633	-0.255005	-0.614913	-0.483435	-0.242695	0.010867	0.189497	-0.025645	0.166492	0.492183	-0.019481	0.150365		13	7
RP11-196P5	1	11777407	11943928	-0.293917	0.450928	-0.171313	0.183152	0.811699	0.175147	0.082879	0.067577	0.053488	0.515249	-0.291916	-0.023603	0.538651	0.306389	-0.014367	-0.086587	-0.076523	0.103083	0.880998	0.074076	0.174265	0.165634	-0.108581	-0.286282	-0.317265	-0.032786	0.003089	0.224193	-0.009038	0.348954	0.616997	0.154837	0.185473		13	7
RP4-636F13	1	12362852	12417597	-0.326941	0.552542	-0.17945	0.25809	0.791909	0.201814	0.109561	0.093338	-0.114848	0.484837	-0.44072	-0.0351005	0.44533	0.503649	-0.006745	-0.115776	-0.085767	-0.103328	1.10574	0.195259	0.103952	0.23458	-0.036183	-0.400795	-0.422827	0.081033	-0.097663	0.23777	0.055457	0.490468	0.631822	-0.161397	0.042866		13	7
RP11-285P3	1	14486430	14563619	-0.359266	0.20358	-0.216287	0.109662	0.798749	0.223281	-0.0082886	0.000316	-0.00809	0.334474	-0.483727	0.0341797	0.150655	0.349781	-0.039489	-0.167766	-0.12827	-0.005575	1.09377	0.078831	0.115324	0.223113	-0.124656	-0.50776	-0.018105	-0.042893	0.167467	0.145694	0.084864	0.437813	0.224096	-0.226927	0.115321		13	6
RP4-560M15	1	15323047	15354151	-0.366192	0.414902	-0.283619	0.081398	0.892077	0.276226	-0.107422	-0.101511	-0.084549	0.374971	-0.370006	-0.0518038	0.551434	0.367402	-0.032283	-0.052687	-0.178885	-0.091452	1.06238	0.0999752	0.16772	0.148048	-0.122656	-0.343128	0.098988	-0.080182	0.0819231	0.267	0.093665	0.351807	0.533723	-0.158199	0.083056		13	6
RP11-430L17	1	16386491	16511439	-0.303057	0.27558	0.031257	0.014364	0.579445	0.147948	-0.013235	0.077524	0.074203	0.24712	-0.203913	-0.05875	0.265985	0.29953	0.020114	-0.138736	-0.077306	0.016892	0.778534	0.093231	0.08445	0.202988	-0.083751	0.03229	0.14266	-0.03678	0.163865	0.198919	0.017708	0.160486	0.311507	0.165174	0.138004		14	6
RP11-45I3	1	16532955	16679672	-0.205191	0.191124	-0.039979	-0.116629	0.566907	0.267682	0.059307	-0.150453	-0.322518	0.149326	0.075387	0.106663	0.428761	0.519101	0.028088	-0.120987	-0.046236	-0.229016	1.23649	0.058755	0.132933	-0.006139	0.121434	-0.389574	0.250458	-0.016825	0.265652	0.230278	0.073136	0.160558	0.408863	-0.122482	-0.027108		14	5
RP1-37C10	1	17012791	17229287	-0.46004	0.25536	-0.348519	-0.003527	0.833977	0.212284	-0.074053	-0.044393	-0.02683	0.486681	-0.05061	-0.014649	0.547149	0.269478	-0.049848	-0.140629	-0.212627	-0.098725	1.04919	0.097122	0.116002	0.111839	-0.259873	-0.470702	0.236977	-0.06222	0.065978	0.208232	0.124275	0.271947	0.332481	0.002579	0.215327		14	5
RP11-174G17	1	18127844	18243134	-0.507137	0.083817	-0.34085	-0.102981	0.773122	0.278553	-0.281464	-0.245081	-0.003147	0.460898	0.071537	0.022509	0.142073	0.20891	-0.118759	-0.165194	-0.386517	-0.257273	1.03465	0.110575	0.052045	-0.05	-0.341869	-0.749051	0.206306	-0.231667	0.11452	-0.007861	0.105067	0.178357	0.332334	-0.173906	-0.012688		14	5
RP4-540O3	1	19057195	19131431	-0.403457	0.204536	-0.35307	-0.043965	0.765421	0.203806	-0.177503	-0.078494	0.013742	0.614294	0.040419	-0.0286503	0.401499	0.211329	-0.013952	-0.166848	-0.286653	-0.275119	1.06269	0.193666	0.073038	0.061375	-0.266629	-0.624725	0.285345	-0.10957	0.065615	0.12258	0.145363	0.303127	0.11892	0.340158	0.076694		15	5
RP4-745E8	1	20352768	20433534	-0.466499	0.224544	-0.343758	0.138044	0.957738	0.222834	-0.099331	-0.022851	0.03741	0.499486	0.075015	0.338356	0.214192	0.299605	-0.00258	-0.149364	-0.264198	-0.138041	1.10995	0.135263	0.033514	0.020809	-0.274561	-0.533654	0.174991	-0.092521	0.188955	0.099578	0.063179	0.320591	0.032757	0.158499	-0.006725		15	5
RP11-132G19	1	21794665	21969826	-0.329502	0.599286	-0.088506	0.260346	0.924348	0.200609	0.127874	0.137294	0.061031	0.412	0.261356	-0.0177856	0.423808	0.462933	-0.026765	-0.057868	0.05954	0.035326	1.06079	0.13711	0.024868	0.273657	-0.106123	-0.252004	0.290243	0.037068	0.163203	0.225638	0.147304	0.492334	0.074371	0.354973	0.0833865		16	5
RP1-184J9	1	23083255	23184205	-0.27257	0.559042	-0.182951	0.230254	0.879731	0.182148	0.210039	0.198791	0.07135	0.336362	0.371681	-0.01914	0.382942	0.459318	0.119368	-0.087175	-0.047564	-0.005254	1.07093	0.049591	0.06786	0.33119	-0.156147	-0.335009	0.326148	0.061249	-0.059496	0.134514	0.071274	0.515554	0.160808	0.390847	0.0962596		16	5
RP11-509F14	1	24369882	24379343	-0.397269	0.255662	-0.315981	0.070749	0.804302	0.176115	-0.010312	0.034528	0.006624	0.515361	0.278563	-0.032266	0.380996	0.409945	-0.02752	-0.144829	-0.11513	-0.093537	1.05941	0.083587	0.145229	0.19681	-0.096041	-0.497572	0.235735	-0.048059	0.140925	0.181388	0.086152	0.374869	0.110379	0.227181	-0.003393		16	5
RP11-304H10	1	24471728	24654478	-0.410853	0.419054	-0.222519	0.05349	0.827818	0.052053	-0.044135	0.082173	0.029999	0.344415	0.234098	-0.177545	0.241111	0.320824	-0.006518	-0.099466	-0.118919	-0.155894	1.05539	0.090311	0.096788	0.093152	-0.155384	-0.477395	0.293618	-0.061646	0.071014	0.184658	0.066729	0.361425	0.301108	0.263868	0.051517		16	5
RP3-398I9	1	24936748	25031988	-0.643457	0.426767	-0.361863	0.041303	0.750803	0.238948	-0.125399	-0.081263	0.132326	0.479622	0.203045	-0.096056	0.336582	0.157482	-0.043228	-0.185857	-0.168058	-0.184808	1.00019	0.131229	0.13035	0.126029	-0.123289	-0.56656	0.276755	-0.085929	0.14027	0.064267	0.070935	0.275004	0.247236	0.281357	0.087975		16	5
RP4-633N17	1	27043076	27164085	-0.613237	0.243526	-0.426551	-0.134531	0.760008	0.210578	-0.246239	-0.09152	0.383916	0.415445	0.311405	-0.192222	0.441979	-0.11519	0.015772	-0.23805	-0.395204	-0.292506	1.00084	0.112694	0.169111	-0.092247	-0.067392	-0.771008	0.120326	-0.243453	0.157828	0.199854	0.152085	0.188846	-0.053262	0.417064	0.103745		16	5
RP1-144C9	1	27386878	27464199	-0.409188	0.358398	-0.172434	0.090731	0.674251	0.151409	-0.068258	0.050646	0.192645	0.471232	0.348435	-0.082023	0.412536	0.20704	0.0124679	-0.093036	-0.05558	-0.143532	0.987353	0.208676	0.135652	0.226032	0.037928	-0.345874	0.209716	-0.050846	0.100509	0.184973	0.117938	0.371777	0.10172	0.417391	0.200739		16	5
RP1-159A19	1	27539867	27665153	-0.594142	0.291577	-0.392861	-0.228432	0.791741	0.343431	-0.308674	-0.188548	-0.158399	0.704508	0.400758	-0.071443	0.461842	0.049471	-0.04709	-0.237079	-0.51114	-0.239436	1.14271	0.149579	0.140257	-0.102104	-0.182522	-0.647435	0.045501	-0.305744	-0.019272	0.142065	0.130553	0.256241	-0.016171	0.594713	0.0694532		16	5
RP4-669K10	1	28647633	28783452	-0.349193	0.656239	-0.0702	0.110981	0.637887	0.178771	0.016752	0.03593	-0.220504	0.510454	0.340162	-0.040968	0.405373	0.339162	0.0245056	-0.10926	-0.026633	0.082598	0.911161	0.1417	0.179645	0.35425	0.180419	-0.411349	0.310129	0.031203	0.077557	0.331001	0.079791	0.432784	0.163734	0.357951	0.237519		16	5
RP3-437I16	1	29429151	29549535	-0.558147	0.467768	-0.307988	0.143036	0.768133	0.186372	-0.037625	-0.028089	-0.321641	0.406084	0.272208	-0.130266	0.10511	0.223023	-0.026273	-0.168998	-0.215019	0.0631	0.929452	0.056937	0.122303	0.204974	-0.011128	-0.499331	0.092602	-0.115523	0.092609	0.040147	0.006616	0.325158	0.037178	0.210741	-0.002303		15	5
RP5-893G23	1	30208785	30298043	-0.468701	0.439643	-0.328536	0.112407	0.790889	0.190909	-0.001594	0.003634	-0.451945	0.451992	0.251978	0.018836	0.152647	0.223816	0.0116864	-0.16298	-0.204889	-0.074205	0.960213	0.087736	0.053935	0.233963	-0.039422	-0.567525	0.029562	-0.126292	0.117226	0.036462	0.091393	0.26389	-0.01119	0.298431	0.0643716		16	5
RP11-84A19	1	31882264	32006676	-0.377099	0.739133	-0.152852	0.207319	0.841801	0.255679	0.094703	0.113673	1.22762	0.55023	0.274016	0.009152	0.405618	0.444259	0.038043	-0.075565	-0.017813	0.21318	1.02039	0.067401	0.089738	0.605152	0.111935	-0.289631	0.129305	0.033338	0.122578	0.233577	0.062386	0.379647	0.147581	-0.0123	0.0539852		16	5
RP11-277A4	1	32171520	32245466	-0.485182	0.449847	-0.200146	-0.009814	0.800169	0.056036	-0.073848	0.045593	1.75176	0.390216	0.309975	-0.058732	0.224459	0.272337	0.040196	-0.136432	-0.188728	-0.058157	1.05244	0.0499391	0.143634	0.219566	0.045458	-0.161271	-0.229594	-0.100852	0.10131	0.257811	0.044533	0.311282	0.097242	0.011834	0.018745		16	6
RP11-114B7	1	32770498	32943373	-0.352339	0.364663	-0.171636	0.147062	0.873318	0.114199	0.0439315	0.110417	0.51572	0.309979	0.304674	-0.0480013	0.351157	0.373958	0.152507	-0.024098	-0.034547	0.071384	0.7146	0.117205	0.074129	0.457333	-0.041733	-0.37778	-0.250736	-0.024022	0.175353	0.206607	0.122911	0.510482	0.20794	0.311105	0.0801931		16	6
RP4-561P1	1	34048582	34150474	-0.610033	0.042944	-0.354564	0.021073	0.828543	0.202422	-0.12305	0.004986	-0.402001	0.292226	0.212125	-0.05321	0.035868	0.20839	0.017308	-0.20518	-0.272538	-0.153491	0.069072	0.053124	0.131209	0.330287	-0.062757	-0.654675	-0.238781	-0.100722	0.225346	-0.024153	0.048203	0.282327	-0.009349	0.170636	-0.033519		15	6
RP4-731G4	1	36500766	36639704	-0.429319	0.170564	-0.15683	0.235761	0.86982	0.254055	0.052151	0.091949	-0.341987	0.29771	0.28157	-0.132574	0.536668	0.368494	0.067036	-0.107042	-0.082548	0.114512	0.138785	0.226458	0.184934	0.419497	-0.147992	-0.33298	-0.148303	0.024597	0.064795	0.21416	0.08003	0.383352	0.212294	0.625165	0.058282		15	7
RP5-1090M5	1	37062612	37195851	-0.519626	0.172968	-0.268069	0.1612	0.935543	0.360362	0.053022	-0.014517	0.500714	0.186342	0.332619	-0.126623	0.132894	0.193649	-0.004784	-0.157902	-0.225239	-0.052044	0.100961	0.189392	0.091824	0.189733	-0.288678	-0.619636	-0.267805	-0.095191	0.089131	-0.014069	0.07432	0.274513	-0.061724	0.485571	-0.0229649		15	7
RP4-783C10	1	37814118	37948278	-0.727771	-0.076578	-0.425674	-0.15387	0.701403	0.12234	-0.27712	-0.178898	-0.491001	0.037749	0.299853	-0.248585	0.273937	0.018959	-0.204347	-0.269712	-0.326692	-0.232064	0.509358	-0.100391	0.196203	0.178701	-0.314323	-0.678443	-0.133347	-0.242297	0.075575	0.120871	-0.053105	0.121653	-0.109154	0.533052	-0.128718		15	8
RP5-884C9	1	38160334	38275947	-0.533418	0.025813	-0.444015	-0.061521	0.739446	0.1241	-0.207087	-0.01233	-0.341354	0.175946	0.328178	-0.152754	0.180263	0.096665	0.088076	-0.18497	-0.202481	-0.179863	0.482308	0.166473	0.109098	0.272746	-0.313765	-0.644747	-0.21795	-0.217732	0.172874	0.046212	0.038896	0.189775	-0.070082	0.540207	0.102681		15	8
RP11-113D13	1	39204381	39347312	-0.341932	0.340456	-0.185183	0.060722	0.807883	0.156294	-0.011185	0.101989	-0.213513	0.144985	0.319889	-0.089794	0.340969	0.332464	0.186947	-0.096266	-0.018182	-0.090868	0.599107	0.155357	0.170529	0.507042	-0.143806	-0.371241	-0.029481	-0.066253	0.145091	0.230877	0.04891	0.372528	0.088729	0.603028	0.101763		15	7
RP1-118J21	1	39894236	40060731	-0.223089	0.566948	-0.121679	0.120183	0.812994	0.247068	-0.007145	0.047891	-0.512278	0.194636	0.437753	-0.081413	0.498995	0.52899	0.020034	-0.102804	-0.068152	-0.073169	0.615344	0.128493	0.10843	0.583888	-0.068847	-0.356186	-0.220024	-0.050228	0.007537	0.297785	0.039565	0.52262	0.171042	0.505269	0.261589		16	7
RP4-739H11	1	40727078	40857027	-0.447062	0.013978	-0.286533	0.185735	0.876443	0.186988	0.019252	-0.032268	-0.484022	0.197484	0.297245	0.088349	0.441274	0.279954	0.02328	-0.119902	-0.073665	-0.015806	0.51377	0.089193	0.138354	0.432218	-0.213881	-0.521849	0.120989	-0.107005	0.046051	0.173241	0.082056	0.395213	0.075204	0.600313	0.0597331		16	7
RP11-342M1	1	42946622	43028325	-0.423179	0.155483	-0.151169	0.148989	0.808789	0.127303	0.055385	0.098589	-0.401393	0.188643	0.278469	0.057175	0.318697	0.318663	-0.006441	-0.142871	-0.034453	-0.057382	0.516278	0.106725	0.10222	0.489346	-0.163477	-0.480541	-0.268334	-0.075567	0.100683	0.165605	0.036399	0.343618	0.058196	0.19825	0.036297		17	7
RP11-184I16	1	43817431	43959296	-0.461573	0.218717	-0.314564	-0.03421	0.919095	0.094686	-0.045406	0.115286	-0.443648	0.173419	0.342714	-0.116653	0.371647	0.252885	0.045468	-0.13023	-0.088114	-0.233716	0.583558	0.169224	0.144545	0.482909	-0.21853	-0.618771	-0.383105	-0.108956	0.148612	0.099795	0.055652	0.304923	-0.027169	0.458786	-0.038245		17	7
RP11-182I23	1	44418884	44505311	-0.496839	0.264014	-0.316261	0.10436	0.928352	0.122755	0.0007392	0.085712	-0.417587	0.329331	0.356668	-0.0200476	0.300099	0.232195	0.044743	-0.137853	-0.144134	-0.179024	0.615533	0.166298	0.069864	0.206922	-0.326545	-0.635905	-0.409915	-0.138481	0.158305	0.107338	0.154514	0.356148	0.067714	0.559513	0.014518		17	7
RP11-420M12	1	45245371	45419546	-0.212014	0.740188	-0.013065	0.319887	0.823422	0.132976	0.314215	0.313773	-0.244721	0.095006	0.292149	0.00125537	0.308084	0.47057	0.144408	-0.034782	0.152339	0.23425	0.474446	-0.01798	0.025309	0.466355	-0.102767	-0.254221	-0.146562	0.080754	0.126323	0.143423	0.052392	0.581585	0.404261	0.667372	0.209665		17	7
RP4-534D1	1	45420659	45520445	-0.30748	0.518291	-0.146561	0.160665	0.433207	0.03371	0.130048	0.177404	-0.310232	0.062015	0.288833	0.087852	0.376511	0.387395	0.084071	-0.049456	0.127606	0.143574	0.476126	0.086809	0.112137	0.408084	-0.072779	-0.259418	-0.17423	0.059799	0.082119	0.187682	0.021469	0.477533	0.447118	0.488477	0.044695		17	7
RP11-322N21	1	46321912	46409145	-0.416014	0.450681	-0.208482	0.16626	0.461095	0.092241	0.099469	0.151061	-0.423803	0.2212	0.368803	-0.077325	0.417621	0.438873	0.055841	-0.13701	0.033734	0.078778	0.559635	0.170068	0.10189	0.199773	-0.132578	-0.396198	-0.309325	-0.027498	0.057453	0.187451	0.042121	0.413618	0.420945	0.447647	0.086218		17	7
RP11-8J9	1	46823998	46981370	-0.475503	0.188518	-0.296748	0.072053	0.416638	0.121784	-0.00696	0.113852	-0.369861	0.04891	0.285482	-0.056142	0.205579	0.285906	0.067449	-0.17415	-0.041195	-0.166216	0.529279	0.086565	0.060528	0.18238	-0.225194	-0.578334	-0.269404	-0.098384	0.056272	0.126515	0.03013	0.393073	0.28689	0.329989	-0.057298		17	7
RP11-330M19	1	47941733	48142100	-0.563387	0.507631	-0.419113	0.105994	0.376771	0.106928	0.018229	0.029628	-0.243556	0.17099	0.232855	-0.0206563	0.274349	0.16968	0.030963	-0.181406	-0.029429	-0.019056	0.465493	0.108656	0.043763	0.161413	-0.266684	-0.520629	-0.418436	-0.149832	0.158517	-0.050565	0.145426	0.40642	0.286351	0.470168	0.0224517		17	7
RP11-428D12	1	48856742	49042441	-0.568585	0.181357	-0.216404	0.058146	0.424231	0.080367	-0.093687	0.103535	-0.361925	0.175512	0.295043	-0.117821	0.059723	0.189618	0.012358	-0.162891	-0.037389	-0.152846	0.523223	0.050158	0.116056	0.041456	-0.377354	-0.745032	-0.369319	-0.078262	0.144308	-0.083869	0.032465	0.320747	0.231253	0.446341	-0.04187		17	7
RP5-1013G21	1	50282497	50399188	-0.439703	0.30483	-0.112684	0.169142	0.46371	0.054226	-0.026111	0.115953	-0.4274	0.080238	0.262404	0.112947	0.24063	0.267555	0.119693	-0.09264	-0.070839	0.133968	0.499143	0.090154	0.07365	0.126386	-0.313264	-0.579543	-0.342522	-0.029654	0.113971	0.039522	0.056581	0.361103	0.498124	0.535352	0.014761		18	6
RP1-86A18	1	50534022	50742213	-0.09101	0.421516	0.139621	0.401081	0.472594	0.109645	0.390613	0.385537	0.876818	0.180548	0.256629	0.243523	0.189091	0.535704	0.211821	0.019875	0.228041	0.408263	0.523205	0.028337	0.043312	0.419576	-0.088436	-0.282279	-0.11214	0.132777	-0.179975	0.112174	0.100852	0.676664	0.55282	0.718075	0.069577		19	5	2.59906	1p
RP11-253A20	1	51595422	51737091	-0.273068	0.22456	0.105095	0.231626	0.523826	0.044068	0.22685	0.392565	-0.284631	0.116981	0.373094	0.20949	0.406077	0.507001	0.152787	-0.123167	0.215728	0.237992	0.605035	0.073859	0.160469	0.4846	-0.102414	-0.319586	-0.170634	0.16715	0.095017	0.218243	0.013498	0.57649	0.047093	0.548081	0.059174		19	5
RP4-631H13	1	53016844	53133079	-0.419845	0.32344	0.035834	0.122922	0.372386	0.018277	0.064707	0.121245	0.392936	0.156098	0.295816	-0.042638	0.263986	0.309043	0.143269	-0.10788	-0.010052	0.331366	0.508751	0.140779	0.288535	0.175931	-0.077236	-0.382303	0.173169	-0.013154	0.171823	0.213822	-0.014098	0.524062	0.107688	0.713518	0.155323		19	4
RP11-117D22	1	53504116	53571552	-0.456643	0.024007	-0.151099	0.023515	0.299099	0.112884	0.003251	0.011597	-0.219579	0.090001	0.262777	-0.0713685	0.388452	0.111775	0.073679	-0.062415	-0.078577	0.056741	0.474312	0.183304	0.200237	0.162776	-0.327659	-0.605571	-0.053925	-0.168965	0.274602	-0.031634	0.125732	0.35706	-0.010968	0.839281	0.173515		17	4
RP11-243A18	1	53742026	53925764	-0.483225	0.185739	-0.066021	0.152176	0.50651	0.20174	0.014499	0.075807	-0.412161	0.285648	0.286808	0.013854	0.296199	0.32314	0.004053	-0.106068	-0.044301	0.356915	0.506545	0.106787	0.359045	0.095444	-0.256493	-0.541306	0.027186	-0.107855	0.059951	-0.004085	-0.017157	0.450976	0.024669	0.613877	0.055744		17	4
RP5-1043G4	1	54833826	54962981	-0.565772	-0.241789	-0.125694	0.016864	0.411144	0.096497	-0.13893	-0.071453	-0.604862	0.120313	0.301799	-0.116071	0.307	0.041049	0.044068	-0.160873	-0.234623	0.216471	0.456245	0.177829	0.173625	-0.010304	-0.292322	-0.706376	-0.029277	-0.186179	0.185133	0.136521	0.087228	0.252212	0.10849	0.4908	0.057265		17	4
RP5-1070D5	1	55615392	55630414	-0.334498	-0.022121	0.036767	0.345224	0.564647	0.151633	0.186015	0.208335	-0.539931	0.194696	0.226914	0.113774	0.285312	0.476731	0.124276	-0.082439	0.029859	0.313557	0.497495	0.122281	0.089739	0.273182	-0.243488	-0.461683	0.008974	0.004529	0.186616	0.021728	0.002947	0.485823	0.194606	0.164521	0.0229671		17	3
RP4-710M16	1	56535110	56663777	-0.436013	-0.090593	-0.014712	0.208711	0.503683	0.071215	0.026373	0.14981	0.418362	0.15077	0.278281	0.053516	0.372872	0.309236	0.002537	-0.11308	0.001105	0.220035	0.490577	0.089999	0.250808	0.188116	-0.176821	-0.524965	0.060813	-0.0314	0.034954	0.0897	0.0244	0.428821	0.484475	0.123895	-0.118543		17	3
RP11-342F23	1	58679912	58729874	3.48433	-0.024411	-0.009405	0.205756	0.484058	0.065775	0.084269	0.112207	0.454526	0.0481885	0.330257	0.010619	0.264601	0.381041	0.036976	-0.054577	0.058796	0.265536	0.524636	0.102669	0.153286	0.314611	-0.27296	-0.378539	0.005254	-0.043085	0.136641	0.035762	-0.012291	0.42313	0.71943	0.397248	-0.00223933		18	3
RP11-37M11	1	59878796	60021088	2.6334	-0.09039	0.034803	0.250127	0.519419	0.007853	0.139374	0.222133	-0.474101	0.07487	0.349945	0.071568	0.311892	0.396711	0.114295	-0.087989	0.050641	0.256105	0.538682	0.103197	0.17266	0.34052	0.002926	-0.26651	-0.048525	-0.022022	0.167824	0.035011	-0.003894	0.525779	0.735907	0.314059	-0.040913		18	4
RP4-668G5	1	60983979	61130693	3.26932	-0.147709	0.025079	0.190415	0.511938	0.077903	0.023403	0.203776	-0.492259	0.083746	0.320703	0.075182	0.211302	0.349506	0.173408	-0.102911	-0.00052	0.294704	0.524648	0.145043	0.239508	0.227921	0.009834	-0.496764	-0.018772	0.021849	0.040272	0.075896	0.019201	0.488435	0.675265	-0.078887	-0.086176		18	4
RP4-662P1	1	62070630	62213855	3.15638	0.253555	0.183169	0.384973	0.561433	0.092889	0.421612	0.417588	-0.494154	0.128771	0.249913	0.217194	0.171984	0.632392	0.154752	0.048256	0.260998	0.449766	0.481281	0.029162	0.089444	0.436043	-0.020393	-0.165362	0.074336	0.183908	-0.152386	0.200405	-0.019494	0.656932	0.759361	0.035419	0.0520856		18	4
RP11-5P4	1	63134959	63313989	1.84957	-0.032146	0.048467	0.263097	0.501573	0.067835	0.160157	0.222662	-0.424662	0.201773	0.258743	0.118227	0.166229	0.45806	0.04201	-0.049853	0.089723	0.296892	0.545248	0.077894	0.102311	0.401663	-0.192935	-0.427873	0.0913488	-0.021918	-0.039112	0.044608	-0.015194	0.483911	0.74987	-0.127668	0.0340834		19	4	5.51746	1p
RP4-537F10	1	64146118	64243351	1.90542	0.067256	0.05539	0.342849	0.477704	0.043423	0.186673	0.222975	-0.557612	0.185403	0.311326	0.031053	0.317529	0.46438	0.024763	-0.072121	0.093737	0.372772	0.5273	0.120862	0.205618	0.251036	-0.200454	-0.389731	0.23664	0.02413	0.192917	0.122413	0.00037	0.483822	0.623436	-0.063668	-0.025105		19	4
RP4-700A9	1	65310790	65399845	1.43158	0.018029	0.013826	0.121193	0.457533	0.034578	0.018966	0.055047	-0.44207	0.135284	0.323488	0.010039	0.343948	0.27664	0.170225	-0.077896	-0.093452	0.33639	0.491519	0.075742	0.180299	0.138448	-0.268113	-0.407891	0.187462	-0.070437	0.07689	0.147582	0.065601	0.375987	0.272143	0.099777	0.089765		19	4
RP4-759M20	1	66616707	66745201	1.1955	-0.186347	-0.01448	0.199755	0.504835	0.076855	0.197195	0.255185	-0.410836	0.08204	0.286997	0.200476	0.411182	0.432693	0.063932	-0.094171	0.18109	0.330218	0.499546	0.09198	0.133173	0.480044	0.074233	-0.318966	0.243453	0.111666	0.205728	0.155359	0.030267	0.51307	0.321468	0.066231	0.0529791		19	3
RP4-547N15	1	67178937	67310181	1.36711	-0.115556	0.052451	0.259215	0.58348	0.068493	0.236118	0.273066	-0.504252	-0.004593	0.343869	0.106885	0.216261	0.502843	0.034348	-0.08847	0.113626	0.292707	0.477616	0.075611	0.147133	0.448854	0.065302	-0.316524	0.20917	0.048908	0.0877457	0.158195	-0.029812	0.653354	0.411134	0.046246	0.07839		19	3
RP5-1033K19	1	68549278	68652416	0.720132	-0.008829	0.0359	0.156212	0.553047	0.033772	0.134506	0.257888	-0.54166	0.006026	0.330233	0.065534	0.07003	0.514361	-0.001418	-0.140879	-0.036296	0.235557	0.475204	0.103064	0.158615	0.494525	0.049877	-0.34473	0.25904	0.000436	0.090241	0.102272	0.014999	0.464216	0.360872	-0.01482	0.050749		19	3
RP11-412F21	1	69155017	69303873	0.170149	-0.262239	0.049347	0.145546	0.551791	-0.036807	0.121349	0.16128	-0.308149	0.034606	0.287661	0.059351	0.105472	0.331541	0.117787	-0.085716	0.039459	0.113027	0.526487	-0.019628	0.098553	0.105886	-0.140428	0.0770153	0.241747	0.003608	0.007548	-0.023417	-0.02182	0.457412	0.220116	0.167378	0.03525		18	3
RP5-944F13	1	69815163	69928677	0.720456	0.416325	-0.043706	0.200678	0.481887	0.111442	0.256122	0.281558	-0.502988	0.100543	0.306734	0.213927	0.142355	0.531275	0.045652	-0.118884	0.1568	0.368387	0.563144	0.0068	0.208079	0.665634	0.072846	-0.358304	0.288904	0.103647	0.084835	0.060014	-0.016347	0.646955	0.319007	0.059977	0.091612		17	3
RP5-1006B11	1	70656922	70754146	0.346548	0.019262	-0.00563	0.175883	0.419662	0.0951	0.252356	0.256529	-0.454764	-0.028417	0.323526	0.120919	0.190496	0.530263	-0.028979	-0.194605	0.01094	0.307208	0.543002	0.056647	0.313399	0.52519	0.163765	-0.369263	0.328908	0.074348	0.08543	0.159674	-0.033164	0.622269	0.360479	0.003366	0.021192		17	3
RP11-175G14	1	71866996	71984946	0.271789	0.046133	0.13827	0.270115	0.470845	0.115488	0.218833	0.310955	0.380276	0.241297	0.257839	0.15138	0.146643	0.594794	0.127808	-0.017568	0.303338	0.429716	0.520542	-0.064234	0.097331	0.661092	0.143837	-0.313048	0.216377	0.136032	-0.176469	0.010946	0.029188	0.729347	0.326385	0.302599	0.0877706		17	3
RP11-261J10	1	72752556	72923372	-0.226066	-0.298534	0.050179	0.253494	0.442673	0.05744	0.238264	0.293112	0.416292	0.30142	0.244636	0.22263	0.056192	0.529795	0.095534	-0.029005	0.196852	0.129747	0.546607	0.109146	0.105535	0.313304	0.025426	-0.420727	0.281374	0.122469	-0.06109	0.028787	-0.039212	0.614018	0.15477	-0.075259	0.00979057		17	4
RP4-716B13	1	73565283	73703767	-0.329586	0.115211	0.054686	0.234732	0.420456	0.074665	0.299188	0.202936	-0.289325	0.418238	0.255077	0.23177	0.094206	0.44083	0.27539	-0.091034	0.152614	0.341004	0.47369	0.126815	0.063033	0.519795	0.273398	-0.265131	0.318738	0.115266	-0.048193	0.004169	0.064714	0.577057	0.485143	0.16703	-0.000690333		18	4
RP11-250D8	1	74414342	74442537	-0.333621	0.033758	0.034518	0.216424	0.413322	0.090147	0.187076	0.313996	-0.425548	0.166996	0.226442	0.198907	0.079934	0.374231	0.11412	-0.084476	0.120699	0.1117	0.512006	0.043781	0.120502	0.509998	0.188506	-0.494296	0.286585	0.03085	0.059029	0.002669	-0.040203	0.552217	0.441214	-0.120549	-0.043875		18	4
RP11-25F16	1	75174135	75328276	-0.275214	0.068028	0.08456	0.267383	0.456047	0.190327	0.193089	0.268898	-0.445271	0.219286	0.277271	0.091959	0.072445	0.474682	0.070978	-0.010735	0.110651	0.239665	0.554859	0.190378	0.117088	0.519503	0.217905	-0.334799	0.151402	0.067614	0.018468	-0.019668	0.005538	0.608775	0.54184	0.083413	-0.002859		18	4
RP5-963M5	1	76580261	76679882	-0.301776	0.278234	0.0131292	0.169571	0.426804	0.044248	0.148996	0.194624	0.303437	0.210224	0.31546	0.025071	0.138783	0.39401	0.179307	-0.137476	0.017266	0.222329	0.414026	0.102928	0.133185	0.370514	0.155148	-0.449033	0.256393	0.027737	-0.070188	0.050566	0.022558	0.49365	0.320406	0.004661	-0.03414		17	4
RP11-306I4	1	77754847	77820126	0.48446	0.741095	0.13501	0.30878	0.505983	0.008841	0.238726	0.288862	-0.296378	0.503535	0.320749	0.239427	0.210738	0.563079	0.26628	0.025563	0.184466	0.458302	0.568236	0.238597	0.160403	0.538262	0.236907	-0.167578	0.265757	0.041375	0.150624	0.165859	0.065624	0.679145	0.415605	-0.078333	0.0058736		18	3
RP11-143H12	1	78893231	79075158	0.379187	-0.103348	0.047314	0.227023	0.445139	-0.124432	0.146851	0.173549	0.360521	0.006756	0.281693	0.062503	0.185864	0.362974	0.031871	-0.037232	0.01966	0.136783	0.476017	0.059779	0.212303	0.415643	0.180262	-0.409767	0.282648	0.015247	0.161329	0.032344	0.030409	0.178908	-0.055956	0.674404	0.008761		18	3
RP4-653E17	1	81782213	81837885	-0.245573	-0.040208	-0.023748	0.132631	0.44865	0.063049	0.122347	0.139569	-0.66755	0.394113	0.320962	0.026519	0.16629	0.603139	-0.063417	-0.073278	-0.023587	0.250894	0.484815	0.151228	0.151223	0.432359	0.273036	-0.498103	0.203897	-0.016618	0.07652	0.115441	0.051212	0.409768	0.337974	-0.060094	-0.069277		18	3
RP11-398N17	1	82443800	82542779	0.228695	-0.144999	-0.204334	-0.004738	0.361567	0.0584614	0.103035	0.093696	-0.597791	0.414072	0.348277	0.0893836	0.092852	0.352464	-0.028555	-0.178132	-0.033665	0.207677	0.472441	0.121722	0.101832	0.488553	0.081607	-0.417719	0.077119	0.005215	0.275305	0.041482	0.0105	0.482045	0.22443	0.078116	0.0233454		18	3
RP11-338F23	1	83433921	83617927	0.288494	0.10208	-0.141041	0.063077	0.069905	0.286191	0.030156	-0.12894	-0.157345	-0.068319	0.115111	0.136911	0.006491	0.281058	-0.066178	0.049567	0.033465	0.05475	0.379784	-0.015349	0.125697	0.301987	0.104392	-0.487123	0.13635	-0.022767	0.240867	0.010246	0.002131	0.148319	0.12046	0.131025	-0.260563		17	3
RP11-118B23	1	84667460	84793024	0.299938	-0.173997	-0.027641	0.169676	0.428872	0.092093	0.170676	0.126334	-0.574738	0.489396	0.375883	-0.010249	0.346045	0.493139	-0.104863	-0.137849	-0.017541	0.263694	0.537163	0.166397	0.269409	0.464649	0.355101	-0.326914	0.240091	0.048367	0.121286	0.212114	0.003551	0.503961	0.06851	-0.029251	-0.034414		17	3
RP4-604P14	1	84904261	85046841	0.155972	-0.372781	-0.033962	0.108985	0.460585	0.093098	-0.00902	-0.012528	-0.539049	0.715512	0.254871	0.044305	0.354171	0.403073	-0.040198	-0.195756	-0.090087	0.130364	0.556701	0.074984	0.129492	0.360062	0.142213	-0.407062	0.075551	-0.057366	0.071395	0.108092	0.034983	0.310272	-0.075083	-0.015217	0.148477		17	3
RP4-722L13	1	85851763	85878765	0.430118	0.023385	0.118197	0.287227	0.323617	0.023923	0.158015	0.205171	0.439447	0.460383	0.293177	-0.064567	0.219186	0.582801	0.047224	-0.102671	0.097708	0.210178	0.568609	0.088705	0.118686	0.499774	0.277762	-0.34028	0.20389	0.126803	-0.018168	0.172126	0.017346	0.585514	0.00745	0.034487	0.111694		17	3
RP4-612B15	1	86858143	86985962	0.208277	-0.286409	0.047362	0.158418	0.511463	0.091579	0.016244	0.059714	-0.394406	0.500989	0.312013	0.0898954	0.428375	0.491264	-0.023649	-0.072405	-0.018632	0.095219	0.561292	0.053683	0.260958	0.44984	0.186736	-0.434477	0.166712	0.003237	0.04905	0.197918	0.006332	0.477532	-0.017687	-0.134199	0.072352		17	3
RP5-1043L3	1	87387995	87489834	0.166749	-0.410467	-0.011028	0.162657	0.450961	0.028977	0.022743	0.009829	-0.43502	0.637862	0.2609	-0.004884	0.282627	0.352669	-0.064347	-0.174411	-0.09117	0.040987	0.531104	0.031242	0.237636	0.361503	0.103146	-0.599338	0.231629	-0.066829	0.127347	0.01007	0.092471	0.429326	-0.114022	-0.094724	0.0745514		17	3
RP11-427B20	1	88566294	88674564	0.296522	-0.260176	0.009254	0.201939	0.435948	0.0366745	0.226107	0.177188	-0.329658	0.446254	0.283073	0.204834	0.195252	0.4294	0.08785	-0.090132	0.077089	0.213858	0.562477	0.050595	0.204315	0.512646	0.210473	-0.426564	0.32742	0.043067	0.134979	0.01154	0.058385	0.602378	-0.122943	0.059375	0.0508634		17	3
RP11-413E1	1	89775732	89960913	0.258217	0.037914	-0.00575	0.246255	0.464778	-0.029977	0.176052	0.101538	-0.515172	0.597098	0.218041	0.157003	0.374318	0.514276	-0.014948	-0.09894	0.101778	0.404083	0.446926	0.128753	0.281247	0.519366	0.240912	-0.411667	0.373062	0.006866	0.192052	0.139621	0.016767	0.520335	0.004095	-0.0106668	0.105616		17	3
RP11-298P9	1	90286242	90386449	0.226851	0.04018	-0.019034	0.107651	0.427276	-0.082584	0.099699	0.076272	-0.415498	0.321982	0.244009	0.042777	0.151071	0.263028	-0.002611	-0.127154	0.028531	0.210824	0.388186	0.049649	0.212721	0.318455	0.210345	-0.508894	0.355872	-0.055965	0.123223	0.083723	0.060809	0.068637	-0.053145	-0.052239	-0.010691		17	3
RP4-665J23	1	91006880	91114643	0.395847	0.070168	0.151431	0.280324	0.515854	-0.037766	0.184005	0.275251	-0.410484	0.381203	0.275601	0.0895366	0.22848	0.576017	0.130965	-0.000412	0.206008	0.125196	0.561962	0.07627	0.149403	0.568556	0.274774	-0.284482	0.358106	0.153125	-0.093817	0.060092	0.021334	0.260583	0.073847	-0.073647	0.061355		17	3
RP4-621B10	1	92229175	92371900	0.347177	-0.040919	0.11234	0.254887	0.525251	-0.039708	0.065832	0.113342	-0.441233	0.276392	0.329098	0.035386	0.158945	0.500375	0.082248	-0.050171	0.03543	0.162055	0.578617	0.099527	0.171369	0.432204	0.22359	-0.3293	0.352662	0.080258	0.029135	0.138647	0.053885	0.23295	0.132414	-0.021083	0.057707		17	3
RP5-1033H22	1	93707742	93849759	0.213194	-0.059338	0.0137	0.168079	0.420699	0.115522	0.088481	0.00381	-0.624371	0.457452	0.301536	0.139416	0.389495	0.545084	0.020175	-0.137439	-0.023163	0.154661	0.544441	0.087546	0.296231	0.490723	0.23	-0.450196	0.159318	0.053233	0.03058	0.194219	0.020221	0.077081	-0.06031	-0.003438	0.211678		17	3
RP11-366L18	1	94576578	94672578	0.336366	0.098742	-0.035817	0.150076	0.403076	0.0279931	0.180372	0.217557	-0.460453	0.31654	0.290426	0.200471	0.351703	0.452524	-0.003568	-0.111357	0.105583	0.324009	0.46147	0.110964	0.227891	0.506967	0.215756	-0.359076	0.165654	0.007071	0.16944	0.153561	0.026918	0.21046	0.039926	0.16283	0.0266257		17	3
RP11-14O19	1	95447402	95625390	0.194433	-0.099848	-0.073973	0.070704	0.376297	0.022416	0.06796	0.067641	-0.587264	0.211073	0.334974	0.036845	0.009123	0.360096	-0.041907	-0.17144	-0.096181	0.237819	0.471072	0.116884	0.227269	0.349896	0.135345	-0.571558	0.197633	-0.071144	0.143518	0.053257	0.034848	0.103071	-0.061983	0.689764	0.02018		18	3
RP11-146P11	1	95695648	95868695	0.325024	0.090687	-0.000147	0.262431	0.451042	0.111265	0.215126	0.209329	-0.504941	0.037214	0.32815	0.14239	0.13902	0.515922	-0.060791	-0.098732	0.11589	0.290802	0.479577	0.178157	0.248388	0.508596	0.34873	-0.414885	0.294326	0.048621	0.085146	0.10268	-0.015126	0.154909	0.018955	0.577335	-0.120447		18	3
RP11-122C9	1	96807528	96994905	0.390054	0.062089	-0.055173	0.101874	0.357855	0.122208	0.228595	0.359168	-0.501033	0.188933	0.367491	0.23066	0.160419	0.451637	-0.019314	-0.110815	0.093315	0.236023	0.520284	0.072401	0.286651	0.595012	0.264235	-0.395623	0.307763	0.0429301	0.05697	0.162127	-0.013357	0.228	0.015115	0.756949	0.148364		18	3
RP11-128G13	1	97831946	97942945	0.494903	0.070987	0.047799	0.294064	0.425522	-0.001102	0.318832	0.306475	0.317391	0.055109	0.355681	0.197132	0.128579	0.595524	-0.030764	-0.073657	0.12953	0.296057	0.525856	0.152174	0.271859	0.682385	0.323236	-0.235722	0.331695	0.145925	0.186466	0.094391	-0.012039	0.28544	0.050892	0.714502	0.044868		18	2
RP11-17C2	1	98620762	98779279	0.385694	-0.026985	-0.010322	0.144203	0.372137	-0.002709	0.161097	0.151723	0.26966	-0.000413	0.448939	0.057767	0.130803	0.514358	-0.088908	-0.059019	-0.041427	0.139584	0.537124	0.182594	0.243142	0.509956	0.228694	-0.289335	0.257937	0.064966	0.149465	0.085314	0.040952	0.154117	-0.036856	0.665606	0.055967		19	2	1.1545	1p
RP11-260K3	1	99610213	99775250	0.338787	0.043366	-0.114889	0.078808	0.260572	0.103621	0.173473	0.164141	0.218695	0.094889	0.291438	0.028336	0.212136	0.338248	-0.07521	-0.097471	-0.051019	0.196421	0.479407	0.155424	0.313229	0.466751	0.213474	-0.413907	0.261938	0.019157	0.185975	0.111278	-0.054626	0.14943	0.214468	0.747729	-0.017921		19	2
RP11-413P11	1	99649839	99775260	0.534854	0.00932	0.13559	0.21498	0.410553	0.188057	0.172811	0.161979	0.395854	0.144271	0.241697	0.154242	0.285097	0.496033	0.006128	-0.081441	0.16031	0.09929	0.67371	0.064862	0.23929	0.504842	0.240785	-0.36735	0.203775	0.04147	0.133241	0.047573	0.121764	0.163596	0.221445	0.582	-0.013242		19	2
RP4-549L20	1	101014775	101146543	0.836187	-0.024987	0.070453	0.16799	0.390641	0.040233	-0.036011	0.168733	0.384494	0.147307	0.392182	-0.113958	0.26975	0.576542	-0.00071	-0.047915	0.040144	0.107748	0.651612	0.124369	0.208716	0.427995	0.213647	-0.33888	0.171269	0.094855	-0.306735	0.114504	0.032723	0.211819	0.095658	-0.079683	0.004607		18	2
RP11-421L21	1	101160094	101352697	1.36617	-0.139474	-0.042524	0.120535	0.408705	-0.031437	-0.025494	0.156219	0.532535	0.053096	0.272915	0.095418	0.138257	0.378403	0.00546	-0.123545	0.072452	0.11372	0.527569	-0.003109	0.201329	0.458549	0.220935	-0.489455	0.21332	0.010419	0.168228	0.080028	0.043691	0.058526	-0.073739	-0.138213	0.157707		17	2
RP11-202K23	1	102305739	102446359	0.259498	-0.230162	0.037752	0.157494	0.338674	-0.070585	0.005486	0.212697	0.643355	0.007552	0.240292	0.275564	0.042116	0.42354	0.079488	-0.108011	0.180151	0.056067	0.558741	0.041852	0.159373	0.517846	0.185816	-0.574968	0.285154	0.077827	-0.124861	-0.009182	0.042621	0.162704	-0.110683	0.0718	0.000995		17	2
RP11-118G19	1	105378829	105542350	0.202118	0.274199	0.06193	0.153544	0.336956	0.140472	0.165774	0.163871	-0.376301	0.274064	0.249456	-0.06914	0.183596	0.501636	-0.074795	-0.085413	0.169383	0.064797	0.572544	-0.056723	0.104928	0.488638	0.26757	-0.300235	0.288286	0.184568	0.135385	0.046675	0.023615	0.353972	0.113036	-0.327762	-0.0160571		17	4
RP11-90H3	1	106012889	106171905	0.274119	0.298062	0.070189	0.094703	0.175765	0.02503	0.0229	0.04268	-0.448386	0.092819	0.282924	0.000437	0.073159	0.499921	0.004421	-0.163988	0.056105	-0.044281	0.520882	0.011003	0.162313	0.515655	0.194023	-0.40325	0.33116	0.018366	-0.069958	0.082772	0.001729	0.161326	-0.148723	-0.426617	-0.000692		17	4
RP5-916A15	1	106670368	106794970	0.399693	0.485263	0.241965	0.384346	0.397618	0.005865	0.220934	0.126651	-0.378051	0.229481	0.239745	0.105331	0.156002	0.652249	0.025119	-0.105426	0.274152	0.220386	0.519212	-0.019897	0.177151	0.488608	0.3266	-0.276486	0.351647	0.207109	-0.050808	0.119269	0.023767	0.244309	-0.077632	-0.52782	0.038922		17	4
RP5-1077K16	1	107296826	107389118	0.384645	0.338871	0.121091	0.155764	0.301042	0.064167	0.031001	0.090073	-0.416529	0.280585	0.267448	0.0489681	0.165714	0.477418	-0.076242	-0.143963	0.016371	-0.041764	0.523302	-0.023859	0.143538	0.264444	0.265416	-0.50584	0.358924	0.029968	-0.233264	0.033252	-0.037784	0.185235	-0.105698	-0.479377	-0.136578		17	4
RP11-28P8	1	108240534	108423486	0.296951	0.383171	0.06815	0.185176	0.320298	0.059049	-0.079817	-0.127321	-0.488107	0.21015	0.366356	0.033828	0.472067	0.545556	-0.114859	-0.119862	-0.026415	0.101505	0.6134	0.148479	0.230711	0.416739	0.219553	-0.462247	0.266745	-0.008333	-0.024639	0.114268	0.051627	0.153024	-0.075149	-0.481067	-0.062308		16	4
RP4-667F15	1	109362443	109408299	0.245231	0.225971	0.058057	0.156706	0.520159	0.095	-0.095457	-0.11537	-0.164664	0.251889	0.358424	0.046424	0.612168	0.473166	0.06782	-0.076775	-0.082068	0.18562	0.562235	0.0340343	0.255167	0.287525	0.2241	-0.457549	0.476623	-0.024573	0.115531	0.233793	0.084357	0.08332	0.030644	-0.531217	0.0134771		16	4
RP5-831G13	1	109726608	109795611	0.153204	-0.013359	0.064311	0.273713	0.485912	0.214369	0.118596	-0.067558	-0.455896	0.369802	0.310201	-0.096671	0.543122	0.393938	0.046692	-0.109774	0.023648	0.388179	0.526961	0.178728	0.257104	0.429663	0.262275	-0.44906	0.402676	0.009448	0.135558	0.181985	0.054312	0.0952	0.107457	-0.496442	0.189005		15	4
RP11-284N8	1	110807795	111000976	0.256775	-0.186945	0.040735	0.229439	0.42389	0.232729	-0.047859	-0.134109	-0.568731	0.404514	0.239171	0.00984378	0.315098	0.333383	-0.026158	-0.116273	0.019199	0.050054	0.594638	0.023972	0.149709	0.286842	0.130682	-0.566277	0.374084	-0.077289	0.115021	0.072946	0.169568	0.105913	-0.085033	-0.53654	0.0752163		15	4
RP11-88H9	1	112222085	112391683	0.202141	-0.142815	0.02157	0.210004	0.399991	0.154635	-0.055397	-0.136751	-0.071673	0.295483	0.28985	-0.035268	0.24492	0.497835	-0.016272	-0.108432	-0.018729	0.26443	0.474849	-0.053422	0.16499	0.203674	0.196505	-0.436746	0.115916	-0.027234	0.069948	-0.074389	0.056189	0.073967	-0.282214	-0.619413	-0.024863		14	4
RP4-770C6	1	112771847	112871186	0.18579	-0.115346	0.031063	0.086026	0.442796	-0.089631	-0.03839	0.022162	0.102219	0.274745	0.29061	-0.020608	0.32378	0.430924	0.055735	-0.090948	0.088695	0.197382	0.518058	0.026195	0.32898	0.292212	0.226353	-0.426651	0.305564	-0.006514	0.0309605	0.032454	0.024865	0.14921	-0.23498	-0.547767	0.143712		14	4
RP11-31F15	1	113215388	113284270	0.243729	0.448446	0.252181	0.188813	0.407095	0.065759	0.053966	-0.000277	-0.538346	0.1118	0.384891	0.05256	0.440687	0.57119	0.074154	-0.115259	0.054169	0.268332	0.609344	-0.009078	0.234637	0.341307	0.339886	-0.337564	0.290058	0.041814	0.112071	0.163492	0.007435	0.159166	-0.193309	-0.514473	0.010232		14	4
RP5-1037B23	1	114319498	114433595	0.119395	-0.356151	0.061106	0.042165	0.396444	0.035327	-0.170821	-0.184479	-0.435161	0.235483	0.300273	-0.101608	0.326548	0.266374	0.061811	-0.105645	-0.093998	0.125596	0.460555	0.088348	0.222852	0.091014	0.072232	-0.630519	0.155084	-0.106538	0.064764	-0.102698	0.049594	-0.02456	-0.306909	-0.612698	0.013688		13	4
RP4-663N10	1	115570964	115748029	0.229127	-0.024873	0.033825	0.306332	0.529405	0.164316	0.050059	0.023207	-0.539779	0.28072	0.18483	-0.049609	0.345383	0.487527	0.137178	-0.071567	0.011881	0.319584	0.485849	-0.011324	0.219001	-0.193744	0.194041	-0.478959	0.159133	0.027593	-0.048896	-0.100963	0.067363	0.091474	-0.213755	-0.745971	0.025993		13	4
RP4-787H6	1	116491003	116618053	0.065536	-0.279131	-0.103366	0.09992	0.463366	-0.062896	-0.145207	-0.089604	-0.439386	0.198597	0.03667	0.045881	0.166945	0.228665	-0.002029	-0.169737	-0.074252	0.080596	0.778024	-0.010761	0.313947	-0.298164	0.12549	-0.70606	0.222237	-0.034787	0.014653	-0.09405	0.068369	0.041576	-0.100522	-0.767724	-0.076738		12	4
RP11-27K13	1	117190759	117317605	0.18848	-0.015385	-0.052756	0.16146	0.410605	0.073305	-0.060607	0.130768	-0.559857	0.25519	-0.069927	0.0147	0.340964	0.398281	0.012976	-0.09202	-0.028547	0.131919	0.785127	-0.039686	0.195944	-0.147051	0.216042	-0.527153	0.170782	-0.058983	0.069203	-0.046743	0.066101	0.086466	-0.331369	-0.623022	-0.00936033		12	4
RP11-13A12	1	118301428	118302187	0.276502	0.498907	0.086203	0.335157	0.457881	0.017428	0.167247	0.544019	-0.478862	0.169921	-0.084319	0.225147	0.271435	0.504678	0.015338	-0.12184	0.206195	0.307008	0.799523	-0.002005	0.244359	-0.000749	0.201753	-0.389032	0.299787	0.067628	-0.004011	-0.077106	0.031597	0.110903	-0.323702	-0.59171	0.049425		12	4
RP5-881A21	1	118571411	118596361	0.202815	0.25505	0.041674	0.171193	0.458546	-0.100997	-0.039779	0.401392	-0.490533	0.117236	0.028358	0.190566	0.097876	0.475662	0.187986	-0.055433	0.060471	0.074872	0.709063	-0.021731	0.222979	-0.088239	0.149079	-0.393561	0.253167	0.047996	0.00094	-0.139712	0.011024	0.231224	-0.249906	-0.517721	0.043339		12	4
RP4-610L12	1	119316386	119391169	0.174068	0.007212	-0.079268	0.079462	0.483214	-0.035899	-0.061725	0.316844	-0.352034	0.07137	-0.022267	0.000519	0.094061	0.277467	0.04737	-0.153672	-0.069886	-0.023396	0.758581	0.0052	0.15231	-0.283647	0.050812	-0.647707	0.119678	-0.100451	-0.158217	-0.146689	0.101493	0.028754	-0.374572	-0.627783	0.0213094		12	4
RP11-418J17	1	119411860	119571017	0.10074	-0.220757	-0.059747	0.056441	0.328465	-0.067701	-0.159369	0.272796	-0.434174	0.154071	0.002436	-0.019309	0.07099	0.284839	-0.010289	-0.140376	-0.098812	-0.008858	0.780146	-0.0528855	0.139907	-0.02459	0.169032	0.167474	0.132303	-0.127546	0.051495	-0.115423	0.036167	-0.038782	-0.352207	-0.485995	-0.068592		12	4
RP11-136A14	1	119957896	120126652	0.18115	0.050498	0.038336	0.160317	0.583129	0.053549	-0.023303	0.445697	-0.320527	0.338554	0.062148	0.101947	0.281083	0.366639	0.20947	-0.16149	0.046315	0.097123	0.908545	0.023346	0.222866	-0.15754	0.227087	-0.445741	0.206689	-0.109222	0.041624	-0.084563	-0.003639	0.193702	-0.219239	-0.379891	0.074823		12	4
RP3-365I19	1	141387477	141531920	-0.251627	0.252469	0.072392	-0.069112	0.201254	0.087951	-0.099863	-0.039212	-0.277039	0.294132	0.26979	0.017558	0.209997	0.060441	-0.08172	-0.298756	0.065487	0.036717	0.898693	0.051768	0.177656	-0.169894	0.220061	-0.170705	-0.21977	-0.079284	-0.158334	0.168296	-0.010422	0.032704	0.101435	0.165683	-0.204566		12	3
RP11-640M9	1	142029100	142199768	-0.029116	0.776152	0.155945	0.039685	0.310734	0.405972	0.085381	0.121165	-0.223853	0.348329	0.260332	0.092544	0.364441	0.378273	-0.067636	-0.146728	0.083196	0.163707	1.02296	0.049569	0.2549	0.012477	0.528047	-0.155381	0.131659	-0.004306	0.063078	0.317363	0.0226891	0.15816	0.135874	0.46244	-0.113708		14	3
RP11-326G21	1	142391276	142548088	0.156207	0.791799	0.018557	0.148572	0.416658	0.214572	0.140618	0.225972	-0.236428	-0.005946	0.217229	0.005911	0.682425	0.492508	-0.203145	-0.114683	0.093745	0.1522	1.02801	-0.045348	0.104739	0.019166	0.497122	-0.333001	0.070311	0.017259	-0.045053	0.297837	0.040053	0.061939	0.006283	0.220432	-0.225813		14	3
RP11-544O24	1	142586139	142665799	0.129193	0.858388	0.156804	0.094418	0.444522	0.354114	0.068851	0.26136	-0.211417	-0.028843	0.31791	0.31424	0.795609	0.575086	-0.232098	-0.068266	0.170078	0.114879	1.21291	0.095379	0.22469	0.183814	0.54495	-0.490897	0.17896	0.014487	-0.049172	0.386108	0.022669	0.142562	0.106227	0.34938	-0.223184		15	3
RP4-634B11	1	142880623	142904570	-0.233559	0.874215	0.209755	-0.065811	0.284249	0.505856	0.055455	0.012843	-0.115061	0.506686	0.305478	0.034671	0.689762	0.424029	-0.049687	-0.081879	0.06231	0.151357	1.03676	0.10627	0.220997	-0.066029	0.430555	-0.13178	0.128298	0.015537	-0.014239	0.338467	0.0283	0.10582	0.146947	0.767372	-0.132965		16	2
RP4-679C16	1	142902571	142929619	-0.31155	0.983493	0.224148	-0.070497	0.211046	0.50673	0.023656	0.020131	0.006727	0.535752	0.416423	0.030369	0.792542	0.341822	0.06032	-0.059903	0.105445	0.101377	1.08993	0.086325	0.330151	0.07806	0.499016	-0.031378	0.176971	0.019534	0.102392	0.372477	-0.003287	0.100705	0.166911	0.793541	0.191813		16	2
RP11-315I20	1	142927620	143134084	-0.440256	0.957556	0.202405	-0.255669	0.272884	0.257354	-0.169308	-0.036626	0.156023	0.673584	0.560241	0.034075	0.705144	0.300135	-0.32669	-0.125077	0.024262	0.105341	1.06644	0.188919	0.268196	-0.156117	0.360145	-0.134079	-0.03028	-0.060306	0.020892	0.387984	0.085211	0.069887	0.136004	0.942257	-0.043794		15	2
RP11-373C9	1	143117214	143257561	-0.067186	0.983533	0.245964	-0.04783	0.361983	0.245765	0.128337	0.201505	-0.069502	0.518863	0.539534	0.066168	0.333117	0.595019	-0.20365	-0.015785	0.100627	0.273901	0.991392	0.059522	0.251746	0.028411	0.430953	-0.042783	-0.005149	-0.067888	-0.026292	0.375817	0.0295974	0.127551	0.22568	0.940178	-0.199465		16	2
RP11-94I2	1	143352668	143518765	-0.146257	1.00155	0.280237	-0.008274	0.391048	0.290969	0.07903	0.106166	-0.164331	0.448507	0.44591	0.149268	0.459458	0.532315	-0.059574	-0.0466	0.172624	0.129292	1.09966	0.058524	0.269621	0.043701	0.489982	-0.041946	0.058849	0.008434	-0.014068	0.366877	0.052823	0.179206	0.229723	0.703488	-0.190584		16	2
RP11-47D6	1	143503556	143518762	-0.240478	0.566243	0.105935	-0.221031	0.175882	0.415034	-0.096134	-0.068381	-0.192188	0.204476	0.321172	-0.004834	0.269754	0.434515	0.04804	-0.126529	-0.047697	-0.166016	1.12103	0.062331	0.116612	-0.005183	0.372224	-0.235424	0.062304	-0.060991	-0.008418	0.253408	0.032126	-0.022667	0.163474	0.627977	-0.125588		16	2
RP4-565E6	1	143516766	143634199	-0.086831	0.742608	0.175223	-0.109127	0.377024	0.411186	0.098857	0.107551	-0.168536	0.144397	0.407131	0.129322	0.418086	0.544641	-0.147756	-0.034111	0.050678	0.045817	1.08329	0.137867	0.26679	0.034734	0.485747	-0.122216	0.021703	-0.031087	0.010576	0.295226	0.087834	0.148272	0.19608	0.703369	-0.332932		16	2
RP4-704D21	1	143684200	143739742	-0.26738	0.890623	0.244037	-0.05256	0.360206	0.498245	0.105415	0.11411	-0.096873	0.365298	0.371924	0.088323	0.492995	0.432391	0.035298	-0.055386	0.102545	0.15167	1.11786	0.113342	0.151722	0.037677	0.3823	-0.048377	0.00674	-0.001765	-0.0183894	0.189206	0.005807	0.144179	0.145817	0.700002	-0.147325		16	2
RP11-325P15	1	143737746	143828829	-0.159032	0.988969	0.323432	-0.055872	0.202358	0.718583	0.00192	0.026598	-0.030084	0.262597	0.53507	0.0673852	0.514346	0.657151	-0.013982	-0.026703	0.090095	-0.016049	1.22144	0.068431	0.19477	0.154411	0.529931	-0.064605	0.04231	0.011954	0.055741	0.30565	0.038293	0.152405	0.223827	0.784334	-0.125799		16	2
RP11-337C18	1	143826832	144029786	-0.050781	1.23524	0.52393	0.116838	0.318789	0.913953	0.220299	0.191338	-0.014724	0.171213	0.533409	0.18518	0.547455	0.700686	0.101332	0.001104	0.347768	0.177124	1.27416	0.08774	0.09388	0.247743	0.481407	0.153186	-0.001771	0.15231	-0.002669	0.30935	0.070975	0.295004	0.183489	0.844572	-0.116392		16	2
RP11-563P13	1	144027787	144096008	-0.146088	0.924819	0.332008	-0.068501	0.192767	0.731009	0.053283	0.30022	0.107937	0.19719	0.329305	-0.009477	0.321246	0.571759	0.097608	-0.059596	0.120325	-0.099705	1.06509	0.070678	0.095947	0.191087	0.431457	0.072092	-0.004817	0.063254	-0.033094	0.21673	0.08359	0.223591	0.114258	0.850269	0.038001		16	2
RP11-441L11	1	144094009	144269502	-0.254022	1.06356	0.37299	-0.034475	0.269235	0.765428	0.06834	0.297957	0.028363	0.243711	0.427699	0.0485667	0.479467	0.590133	0.144664	-0.034279	0.124322	0.029835	1.18005	0.087064	0.173125	0.174038	0.513737	-0.013964	0.039815	0.025153	-0.034741	0.284077	0.038626	0.167693	0.135463	0.820321	-0.163771		16	2
RP11-533N14	1	144267503	144380209	-0.345137	0.998558	0.267364	-0.113065	0.205035	0.883414	0.093859	0.285363	0.106136	0.302442	0.524134	0.129102	0.56335	0.419903	0.075018	-0.085056	0.078449	-0.002133	1.24873	0.052753	0.214973	0.075909	0.481043	-0.082777	-4.7e-05	-0.013353	-0.121433	0.25095	0.108084	0.124474	0.08149	0.809673	-0.213998		16	2
RP11-433J22	1	144378210	144492621	-0.362761	0.628352	0.138725	-0.119035	0.122163	0.577418	-0.02524	0.30111	0.231268	0.142739	0.280363	-0.013577	0.272195	0.414952	0.102107	-0.179452	0.092962	-0.084244	1.03776	-0.021914	0.142954	0.029218	0.338925	-0.052628	0.143924	-0.010098	-0.0260623	0.153666	0.039863	0.006489	0.003879	0.876567	-0.395152		16	2
RP11-314N2	1	144490622	144630713	-0.250905	1.01262	0.291152	-0.251037	0.290116	0.569073	-0.046331	0.247199	0.001949	0.373474	0.601594	0.107274	0.501991	0.47295	0.00577	-0.093926	0.029221	-0.007998	1.2801	0.064815	0.137117	0.032854	0.378687	0.058134	-0.054841	-0.069211	-0.089871	0.215781	0.028029	0.134232	0.086594	0.932932	0.0866916		16	2
RP11-301M17	1	144800023	144991013	-0.240225	1.0175	0.305079	-0.060004	0.237507	0.464397	0.143067	0.117889	-0.124042	0.352818	0.453569	0.095962	0.555536	0.538433	-0.301731	-0.087367	0.115489	0.143516	1.20104	0.082003	0.272224	0.165472	0.54081	0.104023	-0.009608	-0.000425	-0.137179	0.319665	-0.014975	0.223161	0.247469	0.768419	-0.229625		16	2
RP11-14N7	1	145669829	145727426	-0.209006	0.469462	0.155976	0.182664	0.039599	0.266622	0.25434	0.168284	-0.213897	0.13425	0.303134	0.368469	0.065651	0.457872	-0.131059	-0.051794	0.283507	0.074906	0.777137	-0.046772	0.089269	0.072856	0.401432	0.314791	-0.017031	0.020891	-0.019485	0.329305	-0.196093	0.183594	0.122907	0.45267	0.102456		16	2
RP11-403I13	1	145888591	146093292	-0.680386	0.526014	0.334478	0.035376	0.422317	0.366786	0.207956	0.108753	-0.372486	0.645306	0.515504	0.006965	0.35578	0.457865	-0.045759	-0.077991	0.165512	0.258378	1.41519	0.224286	0.30875	0.016212	0.444712	0.13172	-0.089541	-0.053718	-0.083523	0.339361	-0.139146	0.159881	0.219871	0.677949	-0.195611		16	2
RP11-277L2	1	146322719	146401747	-0.006697	0.945457	0.292862	0.159869	0.364702	0.535208	0.288014	0.267926	-0.276616	0.339857	0.480784	0.31489	0.503875	0.504045	0.054462	-0.232743	0.289809	0.334368	1.17492	0.024011	0.232159	0.134203	0.584789	-0.002337	0.116215	0.077644	0.062447	0.3765	0.006214	0.266262	0.244576	0.633624	-0.202818		16	2
RP11-353N4	1	146399748	146524913	-0.27891	0.534339	0.219447	0.084219	0.410739	0.435628	0.164138	0.193256	-0.466847	0.456254	0.417771	0.034669	0.546697	0.518617	-0.061481	-0.080032	0.14371	0.224599	1.30309	0.185818	0.354994	0.022862	0.49977	-0.05306	-0.009255	-0.025667	-0.067668	0.388851	-0.056341	0.165367	0.284051	0.507521	-0.26331		16	2
RP11-196G18	1	146522914	146711869	-0.379103	0.70243	0.241672	-0.109654	0.311677	0.782243	0.126227	0.146188	-0.368613	0.366412	0.485745	-0.082339	0.743745	0.386678	-0.025323	-0.034103	0.03155	0.14655	1.37992	0.157647	0.380667	0.065924	0.482636	0.01402	-0.023862	-0.028339	-0.023169	0.372463	-0.023984	0.139223	0.289362	0.783262	-0.214154		16	2
RP11-212K13	1	146709870	146803455	-0.395971	0.936063	0.182453	-0.29852	0.233471	0.771769	-0.057466	-0.086846	-0.110301	0.383613	0.564208	-0.191429	0.771829	0.276052	-0.070931	-0.045033	-0.184636	0.098294	1.2692	0.237363	0.379821	-0.023061	0.389241	-0.097651	0.070462	-0.157012	0.010946	0.395588	0.083299	0.091995	0.280734	1.0981	-0.147689		17	2
RP11-458I7	1	146785068	146973278	-0.282795	1.35393	-0.183788	-0.143654	0.002654	0.104143	0.137673	-0.238859	0.00117	-0.182102	-0.224831	0.162377	0.230841	0.161798	-0.362337	-0.129339	0.076047	0.022301	0.331026	-0.089474	0.062838	-0.130214	0.087406	-0.02617	-0.107064	-0.007161	-0.079918	0.242568	0.045162	0.095649	0.053594	0.423926	-0.137144		17	2
RP11-35F14	1	146899457	147080954	-0.239155	1.13724	0.237369	-0.118313	0.27786	0.452958	0.053022	0.099819	0.08811	0.391913	0.364541	0.083609	0.795021	0.458196	0.088562	-0.146112	0.046515	0.401248	1.25799	0.190193	0.357366	0.139244	0.475715	-0.067444	0.2038	-0.018078	-0.086094	0.454183	0.142203	0.251203	0.284649	1.1203	0.149212		17	2
RP4-790G17	1	146971282	147104104	-0.216911	1.1181	0.291077	-0.142236	0.375169	0.633298	0.039888	-0.021	-0.011315	0.244713	0.411162	-0.078089	0.821674	0.450599	0.094116	-0.068962	-0.029345	0.222714	1.18646	0.127894	0.316011	7e-05	0.435726	0.12535	0.086008	-0.027854	-0.060966	0.419394	0.113269	0.155664	0.344497	0.869757	0.017615		17	2
RP11-54A4	1	147258288	147434837	-0.34705	0.865033	0.323612	-0.117735	0.274019	0.632971	-0.033647	0.078229	0.042181	0.258916	0.584705	0.111169	0.782426	0.330969	0.21408	-0.072092	0.06532	0.023388	1.16818	0.114447	0.37395	0.040962	0.432954	-0.0197131	0.163761	-0.079166	0.00881075	0.381516	0.043799	0.130627	0.247147	0.92746	0.155279		17	2
RP11-363I22	1	147432838	147586905	-0.180343	1.39674	0.406655	0.094254	0.312012	0.67685	0.373128	0.291664	-0.281842	0.220706	0.631509	0.161585	0.723052	0.566989	0.317799	-0.032513	0.325704	0.275988	1.22874	0.176081	0.299886	0.320199	0.566464	0.104389	0.263569	0.091258	-0.187926	0.428771	0.154314	0.338345	0.405484	1.06256	0.0887855		18	2	0.458614	1q
RP11-235D19	1	147584906	147701356	-0.204864	1.32541	0.484738	0.091485	0.351501	0.700939	0.297154	0.308878	-0.080021	0.285595	0.611157	0.238464	0.635098	0.740921	0.314362	0.070404	0.272957	0.364273	1.25051	0.174711	0.294341	0.312421	0.613317	0.174967	0.29081	0.137508	-0.278351	0.5288	0.089812	0.360804	0.406928	1.07259	0.0887855		18	2
RP11-316M1	1	147699357	147891452	-0.287719	1.23693	0.398047	-0.025769	0.355062	0.568614	0.069997	0.106211	0.153661	0.319379	0.641635	0.049211	0.858261	0.460202	0.311015	-0.019394	0.058968	0.328829	1.24975	0.285028	0.32677	0.111868	0.463511	0.064156	0.144803	0.003271	0.142273	0.424989	0.091935	0.208089	0.326387	1.14443	0.0717567		18	2
RP11-126K1	1	148048595	148169951	-0.403737	1.01334	0.277115	-0.216324	0.118489	0.830202	-0.117278	-0.016023	0.118862	0.517204	0.685464	-0.028797	0.737417	0.452947	0.184874	-0.147502	-0.017907	-0.047946	1.26401	0.146992	0.344141	0.106572	0.492614	0.051147	0.165913	-0.077173	-0.152129	0.477934	0.068351	0.10737	0.224435	1.03098	-0.18074		17	2
RP11-806J18	1	148167952	148294442	-0.080203	-0.285777	0.219109	0.342444	-0.129925	0.149093	0.255401	0.417735	0.059511	-0.001954	0.318286	0.254551	-0.019107	0.409403	-0.236982	-0.017063	0.21264	-0.226844	0.217268	0.0155815	-0.049452	0.0687939	0.398081	0.114594	-0.062896	0.15236	-0.1546	-0.013811	-0.011472	0.263948	-0.012869	0.091795	0.316058		17	2
RP11-74C1	1	148292443	148384272	-0.239036	1.15676	0.388786	0.120898	0.206638	0.604599	0.0487052	0.105006	0.095232	0.336216	0.482667	0.0589197	0.738721	0.50784	0.238868	-0.058158	0.152901	0.127622	1.27229	0.088762	0.204691	0.13895	0.460849	0.095343	0.025206	0.039321	0.017668	0.304092	0.13934	0.213598	0.73219	0.929524	0.123123		17	2
RP11-404E16	1	148382273	148465173	-0.274438	1.14089	0.295645	-0.102555	0.179181	0.768491	0.061856	0.211205	0.034419	0.342119	0.623598	0.028234	0.627281	0.464048	0.107745	-0.105343	0.131198	0.074464	1.21923	0.078458	0.286934	0.11438	0.565354	0.00678456	0.161232	0.021929	0.134035	0.406408	0.083198	0.052056	0.645292	0.846434	0.087954		17	2
RP11-114B18	1	148434504	148607358	-0.365016	1.07573	0.38106	-0.155267	0.259964	0.808422	-0.010321	0.260725	0.136295	0.370198	0.654775	-0.035122	0.60421	0.471432	0.164959	-0.067298	0.097739	0.031859	1.23091	0.118726	0.251178	0.073629	0.554679	-0.016565	0.118753	0.006819	0.048908	0.329296	0.058228	0.168434	0.676812	0.798432	0.008469		17	2
RP11-98D18	1	148463175	148646793	-0.36804	1.02659	0.343469	-0.141492	0.258309	0.461729	0.0098594	0.180032	0.137457	0.329404	0.39738	0.0361016	0.638857	0.316062	0.083999	-0.119292	-0.011919	0.017735	1.24595	0.079119	0.255016	-0.011709	0.374616	-0.077407	0.010135	-0.042418	-0.0889255	0.312244	0.11424	0.102571	0.55255	0.972985	0.364982		17	2
RP11-139D23	1	148624564	148810010	-0.316873	1.15281	0.346573	-0.067718	0.250678	0.688678	0.098647	0.326153	0.232872	0.527929	0.696634	0.114491	0.808881	0.559443	0.179847	-0.08509	0.228485	0.08867	1.25111	0.09169	0.346354	0.203544	0.497442	0.004917	0.178905	0.074381	-0.240101	0.305771	0.07692	0.226347	0.614509	0.944574	0.012011		17	2
RP11-353M1	1	148808011	148883291	-0.27538	1.10238	0.371651	-0.070868	0.447389	0.853709	0.086381	0.364757	0.244734	0.343136	0.848125	0.063575	0.772618	0.553163	0.201916	-0.028465	0.250759	0.237286	1.25559	0.081231	0.281106	0.23212	0.491184	0.028773	0.077975	0.032976	-0.138587	0.301216	0.014532	0.228472	0.665759	0.808381	-0.157424		17	2
RP11-107M16	1	148881292	149032869	-0.288013	1.10148	0.387313	0.006255	0.349262	0.858882	0.154169	0.399138	0.055515	0.223525	0.966849	0.106599	0.446509	0.618737	0.163478	-0.100699	0.168432	0.10693	1.28353	0.011574	0.180989	0.159262	0.443745	0.013346	0.032925	0.030224	-0.219952	0.241541	0.034711	0.200741	0.637603	0.883369	0.0868369		17	2
RP1-14N1	1	149067874	149151422	-0.220763	1.08199	0.423555	0.032289	0.300122	0.268829	0.114792	0.437345	0.183891	0.135237	0.890501	0.305231	0.315169	0.551342	0.298956	0.020649	0.226794	0.234337	1.17324	0.081652	0.225605	0.234243	0.641725	0.105854	0.172247	0.125323	-0.013528	0.345652	0.164026	0.213241	0.580532	0.974227	0.351343		18	2
RP1-91G5	1	149149423	149337707	-0.283582	1.04982	0.236398	-0.090838	0.206705	0.361741	0.046953	0.296653	0.130459	0.232511	0.560897	0.228563	0.433467	0.349892	0.144369	-0.025268	0.121095	0.093939	1.14916	0.046802	0.189533	0.100059	0.371426	-0.075956	0.045988	-0.010455	-0.242822	0.221745	0.034275	0.110651	0.469399	0.892746	0.770111		17	2
RP1-110I3	1	149335708	149388062	-0.595889	0.894049	-0.008341	0.112847	0.608179	0.058158	0.429986	-0.052217	-0.182782	0.509395	0.184387	0.197088	0.588139	0.149954	0.276728	-0.269801	0.159714	0.15663	0.964685	-0.131851	-0.170471	0.192443	0.127458	0.367042	-0.030891	0.015231	-0.121009	-0.132445	0.461347	-0.110401	0.276389	1.29579	0.166129		16	2
RP1-52J10	1	149386063	149503146	-0.431462	0.931063	0.097665	-0.036432	0.396567	0.119179	0.103713	0.124938	-0.097475	0.279236	0.610023	0.208091	0.366144	0.221836	0.221704	-0.178983	0.086882	0.014469	1.06942	-0.062191	0.058605	0.093746	0.308921	0.126467	0.077693	-0.020095	-0.167908	0.047878	0.31589	-0.076149	0.352627	0.95336	0.115423		16	2
RP1-43O17	1	149501147	149597159	-0.162457	-0.930264	-0.31219	0.223916	0.173612	0.170513	0.16076	-0.480735	-0.603317	0.086758	-0.003618	0.12943	0.19637	-0.088618	0.079636	0.039861	-0.132486	-0.155855	0.271711	-0.170898	0.064584	-0.169433	-0.208507	-0.072383	0.467934	0.002669	-0.0787985	0.078823	-0.000106	0.054948	-0.098292	0.060775	-0.121675		16	2
RP1-13P20	1	149595160	149711226	-0.465565	0.942124	0.232403	-0.217984	0.104081	0.207303	-0.010612	0.125439	0.103233	0.155748	0.43896	0.12938	0.450547	0.364547	0.046503	-0.150754	0.067111	-0.006564	1.13043	-0.0546	0.205226	0.004464	0.37071	-0.089464	0.017292	-0.079011	-0.12821	0.050855	0.064244	-0.068949	0.337994	0.788935	0.058269		16	2
RP1-140J1	1	149954198	150091909	-0.398011	0.844819	0.123217	-0.207553	0.140708	0.548409	-0.133669	0.008595	-0.049851	0.181344	0.371502	0.025757	0.268534	0.28355	0.135714	-0.118786	-0.089205	-0.060229	1.10548	0.105578	0.249714	-0.081087	0.372791	-0.113284	-0.020875	-0.118921	-0.0740857	0.256498	0.059978	-0.060126	0.387048	0.798266	0.488812		16	2
RP1-128L15	1	150089910	150254053	-0.361853	0.775704	0.13401	-0.202322	0.088232	0.48771	-0.156126	-0.00351	-0.045661	0.176597	0.191934	-0.094963	0.44671	0.25783	0.085506	-0.112243	-0.13546	-0.018271	1.02199	0.213066	0.3036	-0.037069	0.467656	-0.075216	0.102993	-0.134139	0.024932	0.288696	0.0609	-0.069755	0.352597	0.819724	0.395249		16	2
RP1-148L21	1	150252054	150313451	-0.371914	1.07687	0.150193	-0.243855	0.238779	0.410251	-0.01393	0.162853	0.021454	0.453228	0.582753	0.011801	0.85197	0.371544	0.195514	-0.16422	-0.005178	0.179543	1.1403	0.204735	0.364155	0.101126	0.31269	-0.0189389	0.052021	-0.0496899	0.200611	0.358516	0.065	0.107754	0.494267	1.16837	0.234105		17	2
RP1-178F15	1	150410042	150437487	0.120021	0.107399	0.496771	-0.008664	0.093308	0.260663	0.28423	0.39247	-0.066883	-0.235297	0.063589	-0.056775	-0.037541	0.21589	0.416316	0.002287	0.169486	0.392183	0.184095	0.115173	0.092815	0.236364	0.197744	0.686057	-0.302655	0.107952	-0.107153	0.175099	-0.048796	0.329117	0.236756	1.4503	0.483876		17	2
RP11-216N14	1	150501122	150651287	-0.407702	0.969877	0.228167	-0.226212	0.244684	0.412287	-0.009836	0.191631	0.139996	0.255628	0.340949	0.0540784	0.649566	0.305878	0.110951	-0.12593	-0.015048	0.062686	1.1876	0.075556	0.248901	0.000926	0.276797	-0.148404	0.006372	-0.096967	-0.099933	0.335834	0.119757	0.069193	0.406778	0.876051	0.463335		17	2
RP11-422P24	1	150704924	150880750	-0.351564	0.997501	0.22543	-0.176845	0.294644	0.391889	-0.025335	0.24429	0.110097	0.385989	0.358808	0.082522	0.812753	0.331052	0.138967	-0.073764	-0.022965	0.186099	1.10729	0.174307	0.291544	0.05337	0.381481	-0.003367	0.101735	-0.076738	0.036347	0.424166	0.163341	0.08885	0.481883	0.947196	0.241412		17	2
RP11-144B19	1	150878751	150940154	-0.058024	1.28066	0.360128	0.118028	0.230422	0.567676	0.293634	0.503958	0.024715	0.237321	0.298524	0.331504	0.594585	0.647114	0.413873	0.025953	0.260094	0.425068	1.05018	0.094433	0.207687	0.388681	0.559333	0.387143	0.156004	0.134643	0.244068	0.464491	0.150167	0.345342	0.551894	0.963404	0.326138		17	2
RP11-205M9	1	150938155	151057614	-0.531224	-0.05861	-0.186267	-0.0812124	-0.0891857	-0.154169	-0.179541	-0.202296	0.021571	-0.121277	-0.231287	-0.243759	0.207897	0.266517	0.153282	-0.301334	-0.115133	-0.061488	0.372003	-0.096034	0.044422	-0.133261	0.035215	0.0522172	0.185144	-0.064751	0.100617	0.141564	0.028634	-0.38718	-0.094571	0.992112	-0.176188		17	2
RP11-44M13	1	150936318	151092314	-0.361714	0.978911	0.310437	-0.219274	0.333674	0.200096	-0.021361	0.353708	0.072486	0.228104	0.329115	-0.04196	0.579707	0.4367	0.126228	-0.054702	0.00584	0.101987	1.16446	0.0846	0.318092	0.004181	0.192742	-0.124323	0.048357	-0.113794	-0.253461	0.423187	0.028627	0.129658	0.519938	0.936788	0.474936		17	2
RP11-350G8	1	151108268	151309434	-0.394413	1.05844	0.247579	-0.064101	0.278252	0.392509	0.000371	0.357018	0.042112	0.44109	0.326118	0.081603	0.74975	0.44612	0.127286	-0.076715	0.077651	0.164529	1.13215	0.085274	0.369968	0.080962	0.188155	-0.001557	0.137234	-0.06653	-0.24534	0.425364	0.063834	0.142357	0.462509	1.01443	0.448536		17	2
RP11-274N19	1	151372188	151545201	-0.319187	1.07844	0.251092	-0.042859	0.239099	0.330565	0.070281	0.337679	0.096486	0.30974	0.246382	0.076892	0.679108	0.438335	0.143214	-0.033638	0.122122	0.173526	1.13542	0.114462	0.265691	0.121791	0.237359	0.016597	0.078334	-0.006713	-0.0974788	0.30865	0.034052	0.091559	0.43555	0.939913	0.448536		17	2
RP11-196D4	1	151569546	151746746	-0.362521	1.01041	0.184986	-0.164161	0.250383	0.341809	0.083417	0.252818	0.06469	0.316487	0.205723	0.0546102	0.624502	0.374775	0.187826	-0.03048	0.058724	0.14426	1.11708	0.256251	0.240388	0.043241	0.104692	-0.064695	-0.075405	-0.073997	-0.102743	0.186196	0.167922	0.055462	0.514325	0.908858	0.430347		17	2
RP11-307C12	1	151657112	151839277	-0.460009	0.877584	0.204558	-0.195481	0.292339	0.44012	-0.097431	0.24737	0.07654	0.455845	0.327435	-0.131919	0.771979	0.350896	0.076097	-0.126146	-0.02594	0.0435	1.21782	0.14053	0.319517	-0.008306	0.128803	-0.078374	-0.008945	-0.085706	-0.089138	0.303024	0.07269	0.058618	0.485067	0.807752	0.385086		17	2
RP11-98F1	1	152086110	152090103	-0.422217	0.864554	0.165613	-0.270918	0.304101	0.383311	-0.187626	0.151551	-0.020419	0.33298	0.410403	-0.216374	0.790888	0.337142	-0.005718	-0.128466	-0.141021	0.155271	0.562484	0.228212	0.356572	-0.112675	0.110589	-0.09233	-0.050078	-0.21189	0.03895	0.401183	0.106237	-0.024014	0.556868	0.951618	0.328919		17	2
RP11-21N7	1	152088104	152255579	-0.102772	1.08124	0.38948	-0.126352	0.232604	0.516198	0.111957	0.384689	-0.046597	0.435283	0.306913	0.0269626	0.621313	0.582867	0.080983	-0.033632	0.122974	0.138657	0.389625	0.099862	0.191623	0.179428	0.263914	0.161732	0.130035	0.026043	0.166897	0.41093	0.150616	0.157873	0.555072	0.908423	0.396888		17	2
RP11-29H23	1	152252391	152431454	-0.125342	0.940814	0.2711	-0.022076	0.11483	0.380191	0.023551	0.261535	-0.142423	0.287945	0.187441	-0.004764	0.585545	0.596841	0.153863	-0.037771	0.102976	0.068471	0.394672	0.124662	0.237866	0.0610735	0.346762	0.0261412	0.052374	0.072557	0.081069	0.404033	0.008927	0.144672	0.44312	0.756779	0.313111		17	2
RP11-243J18	1	152440691	152598904	-0.195164	1.3457	0.448247	-0.036223	0.276539	0.473418	0.121233	0.389359	-0.028078	0.446919	0.3797	0.091262	0.709669	0.786088	0.172442	-0.000253	0.144722	0.256969	0.590289	0.027881	0.286491	0.159077	0.45144	0.186681	0.198471	0.08522	0.00655433	0.544691	0.060933	0.229897	0.645244	0.902149	0.420792		17	2
RP11-101O6	1	152546352	152710305	-0.232115	1.34482	0.614517	-0.07198	0.320185	0.51754	0.137841	0.443164	-0.001494	0.241115	0.310029	0.108266	0.420765	0.664843	0.153171	0.002293	0.207204	0.170875	0.36081	0.155724	0.209074	0.138644	0.35655	0.253664	0.127444	0.078728	0.054591	0.536277	0.150944	0.244161	0.637955	0.962829	0.444465		17	2
RP11-336K24	1	152689185	152894647	-0.349851	1.02867	0.29917	-0.243126	0.24068	0.388831	-0.048568	0.306774	0.048724	0.461989	0.332722	-0.031001	0.730043	0.458705	0.045238	-0.111835	-0.031526	0.018342	0.324078	0.088756	0.291439	0.07191	0.197547	0.050984	0.003166	-0.078763	-0.115648	0.451473	0.107236	0.09777	0.505333	0.886652	0.436879		17	2
RP11-172I6	1	152892648	152897176	-0.455955	0.810143	0.200094	-0.225102	0.231276	0.351573	-0.181444	0.186638	0.084117	0.323878	0.334892	-0.106951	0.526542	0.247084	0.073555	-0.156342	-0.106422	-0.01074	0.383758	0.18676	0.297502	-0.048938	0.116081	-0.142926	-0.01888	-0.129807	0.032073	0.354648	0.077639	-0.012145	0.465559	0.688851	0.319371		17	2
RP11-54H19	1	152895177	153059344	-0.386256	0.793785	0.212921	-0.370229	0.193478	0.490157	-0.151403	0.117457	0.004009	0.414127	0.409827	-0.128343	0.161526	0.290748	-0.029774	-0.192848	-0.190576	0.00877	0.659606	0.161444	0.315054	-0.077897	0.110685	-0.106781	0.000256	-0.171317	-0.042916	0.400423	0.111107	0.064733	0.469203	0.720584	0.3938		17	2
RP11-443G18	1	153057345	153165163	-0.478791	0.814359	0.223963	-0.354078	0.119781	0.467668	-0.158663	0.116202	-0.058438	0.357898	0.396843	-0.074003	0.150779	0.402012	-0.03412	-0.162958	-0.198057	-0.112124	0.644738	0.135092	0.323883	-0.067713	0.162722	-0.144727	0.001348	-0.148685	-0.037271	0.404106	0.091968	0.038994	0.508295	0.718826	0.471861		17	2
RP11-139I14	1	153163164	153224308	-0.415792	0.788191	0.249205	-0.415095	0.222404	0.437557	-0.309077	0.042092	0.084736	0.407102	0.559204	-0.113441	0.225904	0.321816	0.017427	-0.137365	-0.28667	-0.214067	0.685358	0.182052	0.267788	-0.171819	0.048879	-0.236998	-0.007227	-0.280315	-0.096919	0.327478	0.192735	0.035916	0.475222	0.812616	0.420308		17	2
RP11-98G7	1	153222309	153273728	-0.49588	0.803487	0.222511	-0.317101	0.193358	0.575558	-0.244761	0.163912	-0.027437	0.337995	0.388633	-0.0742515	0.198147	0.279452	-0.043892	-0.164033	-0.206394	-0.248988	0.613194	0.130518	0.195638	-0.177588	0.043263	-0.189234	-0.016196	-0.264243	-0.124822	0.344112	0.166256	0.012199	0.188393	0.718921	0.465352		17	2
RP11-284F21	1	153271729	153436240	-0.501816	0.887735	0.174871	-0.318463	0.126694	0.488617	-0.224563	0.141096	0.022773	0.512722	0.364139	-0.17424	0.181786	0.339634	0.00929	-0.230253	-0.217109	-0.177513	0.576957	0.07293	0.220124	-0.124183	0.136919	-0.16706	-0.011055	-0.201958	-0.0231404	0.368207	0.131199	0.016927	0.100826	0.765887	0.322387		17	2
RP11-107D16	1	153592838	153692639	-0.115527	0.261649	0.39585	-0.194871	0.147222	-0.231889	0.005888	0.061114	-0.390417	-0.242267	0.168183	-0.154197	-0.234427	-0.030739	-0.394531	-0.017316	0.016814	-0.1401	0.919755	0.123322	0.118461	0.0944611	-0.006697	0.0624115	1.07101	-0.030718	0.08491	-0.028756	0.007476	0.012448	0.917016	-0.079536	0.549626		16	2
RP11-356J7	1	153690640	153787332	-0.387875	0.997416	0.331956	-0.163185	0.347693	0.347289	-0.061245	0.398594	0.066776	0.330291	0.33015	0.000283	-0.09041	0.517822	0.159624	-0.069276	0.059832	0.026015	0.543264	0.093265	0.044205	0.011146	0.176498	-0.027446	-0.011283	-0.066408	-0.013818	0.186029	0.048818	0.114804	0.096194	0.548984	0.288865		14	2
RP11-110J1	1	153785333	153952624	-0.261588	1.13486	0.432639	-0.080953	0.341987	0.354854	0.191128	0.381791	0.135707	0.279682	0.335223	0.0638696	0.11099	0.509938	0.201233	0.016714	0.141737	0.131325	0.55596	0.068089	0.019819	0.067646	0.122179	0.042135	-0.021302	0.011166	-0.0878673	0.162915	0.132218	0.201208	0.15768	0.742285	0.143137		14	2
RP11-71G12	1	153950625	153997560	-0.357751	0.929122	0.262014	-0.115311	0.210337	0.340797	-0.008277	0.463432	0.371443	0.352053	0.360709	0.015113	-0.114031	0.428469	0.150708	-0.092677	0.075914	-0.036772	0.513019	0.005463	0.0764825	0.051602	0.192829	-0.032715	0.071587	-0.009089	-0.309654	0.213383	0.023451	0.16177	0.018721	0.640961	0.458499		14	2
RP11-85G21	1	153995561	154177585	-0.370418	0.938638	0.312954	-0.150522	0.317316	0.378132	-0.032922	0.470335	0.332529	0.287264	0.324532	-0.016694	-0.114171	0.443909	0.20444	-0.049866	0.067427	-0.003814	0.507596	0.000433	0.031505	0.043078	0.194215	-0.02598	0.064069	-0.033632	-0.055864	0.182432	0.059109	0.176843	0.109789	0.599647	0.293272		14	2
RP11-217A12	1	154198019	154333751	-0.260787	1.23635	0.430527	-0.0733784	0.327035	0.505495	0.0730442	0.488	-0.413619	0.307484	0.301768	0.061311	-0.076486	0.566881	0.120715	-0.04639	0.197413	0.207221	0.622846	0.026638	-0.066774	0.117668	0.187123	0.121982	0.089225	0.043023	-0.040475	0.142125	0.113736	0.215843	0.122467	0.616346	0.005893		13	2
RP4-801G22	1	154331752	154428897	-0.284956	1.16809	0.309964	-0.01364	0.249827	0.370022	0.085314	0.343752	-0.328307	0.140068	0.271455	0.125473	-0.097173	0.509541	0.023277	-0.078642	0.135708	0.222072	0.477519	0.064523	-0.021595	0.122819	0.264527	0.035392	0.074771	0.045816	-0.013776	0.242732	0.016728	0.14269	0.071008	0.763376	-0.349333		13	2
RP11-367J7	1	154428798	154589153	-0.340422	1.00319	0.262843	-0.095387	0.162079	0.293961	0.023305	0.400349	0.066577	0.304368	0.216695	0.140862	-0.213009	0.461277	0.12006	-0.151215	0.106397	-0.052735	0.535872	0.032482	0.018318	0.114868	0.171256	-0.03987	0.05384	0.010366	-0.108378	0.18378	0.089621	0.179657	-0.024746	0.501325	0.143137		13	2
RP11-206M24	1	154602575	154603342	-0.363824	0.945975	0.212407	-0.090878	0.197787	0.393083	0.046535	0.322553	0.052745	0.305337	0.249028	0.0344257	-0.050932	0.346337	0.004141	-0.082611	-0.00545	-0.044228	0.500456	0.049765	-0.016852	-0.021379	0.076695	-0.021136	-0.053567	-0.047514	-0.0905051	0.138633	0.153486	0.105492	-0.002568	0.672265	0.222976		13	2
RP11-120D12	1	154589054	154652686	-0.375142	0.873612	0.304782	-0.204989	0.25483	0.321893	-0.025097	0.382705	0.073939	0.217451	0.275801	-0.005592	-0.210427	0.466816	0.148822	-0.082793	0.021272	-0.166596	0.553994	0.06345	0.017962	0.01413	0.142428	-0.068268	-0.004782	-0.076347	-0.13044	0.157903	0.070491	0.100299	0.009203	0.60578	-0.209914		13	2
RP11-444M10	1	154716835	154906311	-0.446678	0.321075	0.173116	-0.231654	0.252557	0.272742	-0.03845	0.146617	0.131283	0.453778	0.099064	-0.088356	-0.023194	0.255396	-0.24602	-0.164662	-0.044584	-0.162061	0.292064	0.013747	0.034418	-0.06237	-0.066495	0.055577	0.04131	-0.117495	-0.180113	0.120496	0.023288	0.00821	-0.057201	0.694925	-0.229822		12	3
RP11-404O13	1	154904312	155038448	-0.41945	-0.561361	0.195315	-0.260751	0.319633	0.320308	-0.148116	0.292707	0.148533	0.240117	0.295625	-0.061926	0.014489	0.310229	-0.30137	-0.128031	0.002517	-0.019485	0.510586	0.034738	0.065748	-0.008752	-0.009728	-0.129049	-0.089801	-0.09336	-0.027959	0.185967	0.054949	0.013823	-0.014131	0.460894	-0.180246		12	4
RP11-101J8	1	155036449	155205201	-0.208079	-0.290864	0.318002	0.038053	0.285088	0.249855	0.297762	0.384872	0.067997	0.150542	0.679467	0.338293	-0.012114	0.476131	-0.064796	0.020712	0.185702	0.114736	0.435108	0.2789	0.162745	0.108622	0.131239	0.116226	0.016626	0.018487	-0.120752	0.161734	0.155689	0.157919	0.078612	0.730641	0.0645167		13	3
RP11-144L1	1	155205102	155332055	-0.206384	-0.453463	0.283204	-0.02231	0.290279	0.219136	0.163536	0.553216	0.0527765	0.153369	0.854179	0.320827	-0.117604	0.570325	-0.24212	-0.024978	0.279786	0.050371	0.495359	-0.365349	0.230393	0.107332	0.240796	0.0303809	0.109683	0.090038	-0.202188	0.248801	0.017183	0.162622	-0.005995	0.694883	0.034569		13	3
RP11-317F9	1	155330056	155368507	-0.278054	-0.56159	0.307331	-0.019468	0.354711	0.210729	0.088109	0.495619	0.098656	0.148745	0.904092	0.246369	-0.100203	0.496455	-0.133272	-0.062409	0.149068	-0.069156	0.538374	0.0508538	0.284408	0.0955981	0.266313	0.00932243	0.15054	-0.01295	-0.129916	0.237574	0.01352	0.191637	0.045912	0.568259	-0.039548		13	3
RP11-452O22	1	155366508	155479177	-0.102564	-0.139041	0.504818	0.230243	0.363873	0.32341	0.458625	0.614615	0.04928	0.213603	0.882248	0.213543	0.015735	0.820486	-0.206869	0.051266	0.403004	0.287935	0.512279	0.213651	0.22479	0.349888	0.350007	0.201082	0.181986	0.195545	-0.047292	0.2393	0.061769	0.386331	0.199092	0.793474	-0.0295156		14	2
RP11-432E18	1	155477178	155658176	-0.209559	0.456714	0.318401	0.002334	0.290453	0.258955	0.088546	0.350126	-0.019763	0.177306	0.874568	0.154501	-0.071633	0.563609	-0.273398	-0.004517	0.147402	0.121392	0.50458	0.034853	0.226473	0.186783	0.185434	0.002642	0.071252	0.009629	-0.41156	0.228845	0.040095	0.196588	0.035023	-0.184447	0.169406		15	2
RP11-393K10	1	155656177	155687992	-0.138556	1.09429	0.345785	0.073982	0.36138	0.170049	0.190825	0.306484	-0.028512	0.119627	0.832978	0.201788	-0.053242	0.582746	-0.250129	0.032614	0.236016	0.196684	0.413328	-0.009715	0.213935	0.224525	0.255169	0.181958	0.084796	0.124515	-0.176587	0.292239	-0.028268	0.232092	0.111915	0.686199	0.0061894		15	2
RP11-520H16	1	155685996	155866737	-0.163964	1.29248	0.4065	0.140351	0.347447	0.335776	0.299323	0.421882	0.089521	0.214834	0.903761	0.273483	0.154844	0.658089	-0.234727	0.046368	0.22148	0.242767	0.499217	0.146085	0.194146	0.325942	0.208762	0.146868	0.058608	0.108322	-0.277849	0.200315	0.063666	0.304112	0.14361	0.746965	0.0061894		15	2
RP11-59J4	1	155864738	155914086	-0.357318	1.09868	0.317227	-0.015495	0.316548	0.264414	0.067607	0.316404	0.100343	0.335567	0.991093	0.12697	0.055505	0.500824	-0.387119	-0.067521	0.142114	0.04306	0.50842	0.123239	0.289087	0.078257	0.128189	-0.085058	0.021324	-0.018968	-0.36459	0.235306	0.031473	0.134559	0.037051	0.605378	0.17844		15	2
RP11-550P17	1	156029038	156197376	-0.140548	0.886526	0.500661	0.103122	0.41885	0.256324	0.272096	0.480446	0.103397	0.260179	0.897169	0.293794	-0.043022	0.713227	-0.146554	0.062327	0.349931	0.228928	0.527985	0.005566	0.19619	0.3258	0.315421	0.167649	0.124632	0.175053	-0.198491	0.203053	0.061632	0.343833	0.126721	0.528382	-0.136451		16	2
RP11-180D21	1	156195377	156281483	-0.165064	-0.139079	0.43936	0.129437	0.367231	0.343443	0.381265	0.362933	0.035194	0.166831	0.886237	0.168612	-0.044205	0.607285	-0.268643	0.006892	0.222442	0.191136	0.465246	0.072316	0.162593	0.235651	0.211629	0.181459	0.151183	0.054916	-0.267856	0.127137	0.136713	0.291938	0.136624	0.664046	0.112599		15	2
RP11-419N10	1	156364618	156559891	-0.201914	-0.312035	0.370004	0.916546	0.293634	0.274064	0.175704	0.357846	0.130741	0.154502	0.868896	0.202082	-0.073041	0.614032	-0.373815	-0.039016	0.239472	0.088638	0.480086	0.010635	0.215763	0.21315	0.193589	0.010352	0.104813	0.044052	-0.207447	0.254501	0.010854	0.226606	0.001114	0.738991	0.103514		15	3
RP11-190A12	1	156557892	156696753	-0.445561	-0.76046	0.167929	0.904629	0.170821	0.29695	-0.168715	0.062278	0.012882	0.255985	0.900986	0.018714	0.13022	0.25012	-0.476666	-0.139389	-0.087468	-0.058711	0.403322	0.007327	0.297795	0.0246295	0.088	-0.116934	-0.027527	-0.149594	-0.015339	0.244782	0.078166	0.000494	-0.010861	0.584956	-0.280501		15	3
RP11-48O20	1	156694756	156775153	-0.34758	-0.65576	0.101901	0.849117	0.186992	0.233424	-0.052405	0.009406	-0.029459	0.158546	0.909172	0.120454	0.171792	0.267461	-0.421848	-0.154287	-0.059323	0.033904	0.411608	0.0954722	0.288449	0.0400488	0.105258	-0.09022	-0.073083	-0.078908	-0.0336481	0.263669	0.129205	0.02427	0.010131	0.774293	-0.0248857		15	3
RP11-226L15	1	156773154	156830090	-0.462015	-0.690268	0.063889	0.784039	0.249945	0.296044	-0.150752	0.010159	-0.009342	0.285738	0.919029	0.005348	-0.005118	0.281442	-0.519042	-0.152457	-0.099131	0.044716	0.410615	0.145711	0.267278	-0.063934	0.049404	-0.114484	-0.098171	-0.116558	0.077687	0.251177	0.094254	-0.095957	-0.049104	0.771282	-0.018214		15	3
RP11-536C5	1	156828091	156998924	-0.493879	-0.723479	0.013869	0.755889	0.267724	0.218057	-0.275898	-0.072446	-0.037636	0.343408	0.975677	-0.17046	-0.058709	0.150257	-0.499688	-0.166679	-0.216018	0.073901	0.396985	0.122139	0.2516	-0.163877	0.026125	-0.305326	-0.047955	-0.265934	0.005638	0.297892	0.196726	-0.121544	-0.032411	0.750453	-0.178159		15	3
RP11-574F21	1	156996926	157049118	-0.342686	-0.541238	0.134645	0.470147	0.181748	0.242415	-0.05912	0.188981	-0.034539	0.159141	1.03523	0.179449	0.072022	0.328957	-0.487256	-0.188706	-0.041463	0.120311	0.471413	0.121816	0.311367	0.051229	0.168674	-0.085405	-0.050277	-0.089529	0.010602	0.416174	0.0522	0.10253	0.06774	0.836391	-0.0690055		15	3
RP11-179G5	1	157047119	157123855	0.14644	-1.26057	-0.0548	0.023116	-0.298334	-0.109363	-0.099698	-0.329037	-0.534504	-0.641794	-0.097646	-0.100358	-0.318611	0.155484	-0.569995	-0.056506	-0.096176	-0.212608	-0.257649	0.014342	-0.025124	-0.075469	-0.193308	-0.068325	-0.433825	-0.108553	0.052239	0.027863	-0.127685	-0.341863	-0.1026	-0.147206	0.350614		13	3
RP11-517F10	1	157121856	157224200	-0.322234	-0.522328	0.176396	-0.167136	0.242964	0.260891	0.024413	0.225954	0.12804	0.149798	0.958689	0.073812	0.000508	0.349488	-0.357785	-0.107364	0.027202	0.108546	0.487493	0.095783	0.222821	0.05222	0.128796	-0.117318	-0.037265	-0.041682	-0.068549	0.209319	0.128566	0.090178	-0.022595	0.790616	-0.137874		13	3
RP11-193E22	1	157117172	157298423	-0.370968	-0.62605	0.110317	-0.27081	0.182086	0.228468	-0.092883	0.146864	0.039588	0.153171	1.02575	-0.050949	-0.11722	0.360993	-0.514991	-0.168442	-0.106984	0.019771	0.45475	0.156043	0.264949	0.000798	0.102846	-0.160934	0.007498	-0.104505	-0.077246	0.288395	0.071196	0.03644	0.06149	0.763266	-0.216338		13	3
RP11-528G1	1	157222201	157397586	-0.353562	-0.498737	0.175299	-0.193064	0.290195	0.224736	-0.032593	0.189671	0.023128	0.119983	0.93391	0.144073	-0.040671	0.39963	-0.434131	-0.152649	0.00063	0.061557	0.384258	0.094542	0.246186	0.017112	0.159345	-0.142988	0.054627	-0.075595	-0.0652645	0.293703	0.094836	0.096644	-0.008579	0.668097	-0.137874		14	3
RP11-404F10	1	157395590	157591565	-0.252485	-0.402013	0.186421	-0.00176	0.281975	0.264783	0.007607	0.16057	-0.094576	0.150693	0.898833	0.095428	0.126852	0.410323	-0.383232	-0.111576	-0.000523	0.168872	0.421913	0.099783	0.275957	0.064325	0.181568	-0.088015	0.043193	-0.099269	-0.0592048	0.34155	0.165822	0.106396	0.069766	0.600423	-0.23553		14	3
RP11-312J18	1	157589566	157730861	-0.35491	-0.493054	0.109075	-0.261064	0.235589	0.26418	-0.052888	0.143901	-0.076906	0.191038	0.99768	0.107212	0.015218	0.392249	-0.392415	-0.185192	-0.05934	0.372482	0.418313	0.114774	0.23674	0.008775	0.101852	-0.044794	-0.01339	-0.143602	0.039208	0.309961	0.098114	0.085564	0.052425	0.807621	-0.194899		14	3
RP11-544M22	1	157728862	157929683	-0.451318	-0.582979	0.121504	-0.317475	0.291123	0.28221	-0.097629	0.002408	-0.069218	0.263548	0.965512	-0.112039	0.205115	0.257328	-0.487474	-0.127569	-0.160776	0.398624	0.461213	0.137927	0.303303	-0.062601	0.090724	-0.106649	-0.001367	-0.0790638	-0.032408	0.368502	0.132686	-0.016809	0.069745	0.837788	-0.208319		14	3
RP11-137A12	1	157885434	158056448	-0.366235	-0.399133	0.259315	-0.065907	0.236114	0.299796	-0.013179	0.073226	0.061503	0.228227	0.959126	0.0682392	0.331553	0.35696	-0.335317	-0.072183	-0.044497	0.401274	0.496974	0.131388	0.288008	-0.013135	0.124055	-0.028616	-0.033128	-0.101481	-0.062885	0.329362	0.138335	0.059722	0.085986	0.694269	-0.169913		15	3
RP11-5K23	1	158226187	158356091	-0.372632	-0.492445	0.213445	-0.108683	0.448722	0.407255	0.050665	0.121133	0.055768	0.362047	0.929657	0.075798	0.324428	0.649724	-0.411504	-0.053332	0.094342	0.161363	0.519582	-0.036	0.306567	0.169595	0.115913	-0.043427	0.05896	-0.000138	-0.00657	0.33888	0.124023	-0.039557	0.10624	0.615267	-0.135347		15	3
RP11-474I16	1	158334971	158493611	-0.280722	-0.550771	0.221171	-0.178261	0.373795	0.347749	0.060032	0.206945	-0.033747	0.198707	0.908713	0.064943	0.198664	0.575327	-0.427228	-0.096311	0.052492	0.408211	0.485962	0.026735	0.228164	0.189819	0.121657	-0.021013	-0.034136	0.014328	-0.000455	0.319359	0.114597	0.057678	0.107583	0.763462	-0.163757		15	3
RP11-195G14	1	158491612	158498620	-0.204424	0.734672	0.287604	-0.065283	0.267081	0.2386	0.080395	0.338314	0.036993	0.182588	0.998711	0.176215	0.104993	0.583099	-0.230294	-0.069487	0.10744	0.33056	0.578076	0.209754	0.245118	0.195897	0.271681	0.013756	0.103244	-0.043639	-0.028031	0.367252	0.003094	0.269349	0.067629	0.212227	-0.233394		15	3
RP11-456P18	1	158496621	158708282	-0.287724	-0.515281	0.217851	-0.078494	0.098488	0.267445	0.042338	0.196473	-0.016614	0.194711	0.761361	0.156923	-0.106677	0.446806	-0.288564	-0.067451	0.144905	0.374767	0.516018	0.003104	0.275925	0.118714	0.187024	0.017155	0.065226	0.000369	-0.0695314	0.276897	0.057474	0.202286	0.010847	0.725928	-0.195374		15	3
RP11-227F8	1	158706283	158809805	-0.436031	-0.578991	0.173892	-0.145623	0.153823	0.253555	-0.072412	0.13617	0.053337	0.277396	0.760482	0.094939	-0.052065	0.336691	-0.465669	-0.160336	-0.030633	0.420433	0.459007	0.105059	0.296014	-0.059386	0.159357	-0.125455	0.049631	-0.110984	-0.165007	0.225716	0.048179	0.071868	-0.005883	0.7631	-0.072048		15	3
RP11-384L19	1	158807806	159016213	-0.407367	-0.722262	0.215515	-0.161281	0.25068	0.244906	-0.084161	0.136222	0.034385	0.139595	0.856506	0.128298	-0.102156	0.366142	-0.423017	-0.090805	0.006575	0.29568	0.50424	0.0854854	0.224536	0.0573542	0.123856	-0.0649582	-0.002338	-0.087884	-0.09484	0.160511	0.002737	0.069161	-0.015462	0.577906	-0.273399		15	3
RP11-565P22	1	159014214	159131095	-0.404399	-0.54413	0.21845	-0.111937	0.257897	0.267031	0.037418	0.264729	0.145883	0.274122	0.963662	0.069987	-0.025742	0.400707	-0.398775	-0.115525	0.104205	0.298439	0.472988	0.112184	0.231481	0.030839	0.11648	-0.0404773	0.03941	-0.039964	-0.11454	0.174713	0.003452	0.076961	-0.042549	0.702072	-0.124797		15	3
RP11-130F5	1	159129113	159235014	-0.165916	-0.130205	0.362042	0.145326	0.299842	0.254013	0.30075	0.372004	0.094792	0.102452	0.92589	0.193975	0.193176	0.592524	-0.178884	-0.002203	0.250448	0.597864	0.491373	0.141053	0.25606	0.251426	0.243449	0.009708	0.125288	0.089407	-0.0877486	0.199308	0.116556	0.276123	0.133734	0.725963	-0.0188302		15	3
RP11-572K18	1	159383785	159500824	-0.232701	-0.3583	0.285334	0.025303	0.234272	0.351051	0.093369	0.32806	0.020485	0.132626	0.904919	0.125968	0.037814	0.466516	-0.350282	-0.027882	0.127325	0.468365	0.53755	0.149502	0.146673	0.146459	0.104158	0.059394	-0.082933	0.013655	-0.111381	0.152248	0.050108	0.180485	0.047794	0.835411	-0.0290222		15	3
RP11-331H2	1	159498827	159690698	-0.314077	-0.547075	0.305242	-0.019552	0.234078	0.249345	0.032467	0.300473	-0.009389	0.148762	0.920031	0.154621	-0.054366	0.520105	-0.316124	-0.074585	0.159249	0.264938	0.420349	0.066421	0.043448	0.150326	0.170957	0.098738	0.011437	0.023223	-0.040687	0.153074	0.027491	0.125867	0.065056	0.601024	0.191327		15	3
RP11-430G6	1	159688699	159854027	-0.241211	-0.513808	0.352099	0.86323	0.377867	0.179124	0.139841	0.299368	-0.043888	0.050577	0.977075	0.176459	-0.103642	0.589027	-0.380434	-0.005226	0.220884	0.421405	0.430895	0.039967	-0.016645	0.172269	0.210746	0.008929	-0.015693	0.098747	-0.1306	0.163919	0.018487	0.171637	0.077251	0.246742	0.304867		14	3
RP11-522G14	1	159852028	159894355	-0.171832	-0.213597	0.417779	0.0457577	0.246381	0.21943	0.416339	0.357848	0.004578	0.287813	0.870399	0.171837	-0.119014	0.700523	-0.246709	0.005333	0.34838	0.486768	0.429174	0.127942	-0.062462	0.270446	0.252095	0.114609	0.035122	0.152725	-0.267419	0.134564	0.108298	0.291879	0.135922	-1.06007	0.303316		14	4
RP11-239E12	1	160156260	160324803	-0.272768	-0.516215	0.356696	-0.104266	0.283684	0.289549	0.094523	0.322076	0.036631	0.191908	0.986124	0.045402	-0.283061	0.578542	-0.366584	-0.094783	0.166619	0.281758	0.451019	-0.0227	0.070925	0.121059	0.101398	0.014982	0.010981	0.027132	-0.258762	0.138005	0.025619	0.132145	-0.005085	-1.26786	0.358977		14	4
RP11-421P17	1	160322804	160340828	-0.192769	-0.348537	0.364478	-0.0358641	0.23776	0.269191	0.112552	0.291981	0.080685	0.147781	0.947068	0.169712	-0.234547	0.474174	-0.296031	-0.039224	0.156085	0.199908	0.472948	-0.02331	-0.034933	0.0522088	0.061336	0.044463	-0.0344	0.008775	-0.170759	0.101106	0.146054	0.163097	0.0597	-0.931184	0.42782		14	4
RP4-640E24	1	160439767	160542278	-0.172283	-0.515555	0.188336	-0.173226	0.174907	0.230435	0.043187	0.178357	-0.156364	0.022714	0.841776	0.166324	-0.297875	0.568397	-0.309006	-0.084352	0.05061	0.362801	0.300321	0.077576	0.002187	0.182746	0.220061	0.048594	-0.001209	-0.019228	-0.097039	0.202649	0.018792	0.043942	0.024978	-1.04946	0.099272		14	4
RP11-312H18	1	160540279	160711913	-0.231208	-0.43773	0.331423	-0.108078	0.255711	0.318117	0.109962	0.444036	0.187445	0.228714	0.849756	0.162268	-0.107725	0.594638	-0.233074	-0.063761	0.277652	0.107662	0.4954	0.003894	0.001512	0.07533	0.198781	-0.018386	0.108373	0.108534	-0.002568	0.124332	0.013789	0.236239	-0.030838	-1.23119	0.180127		14	4
RP11-26I16	1	160709914	160739698	-0.262729	-0.453146	0.324924	-0.120986	0.222284	0.238337	0.139011	0.372789	0.115418	0.172429	0.868102	0.145308	-0.188097	0.597751	-0.36144	-0.068763	0.22383	0.233198	0.498293	-0.044083	-0.028917	0.143504	0.180399	0.036065	0.022338	0.074537	-0.152667	0.092904	0.02966	0.198662	-0.015987	-1.26709	0.311305		14	4
RP11-343F16	1	160737699	160928098	-0.17411	-0.353964	0.395749	0.163454	0.260137	0.299382	0.162383	0.458146	0.128193	0.059231	0.899869	0.407498	-0.197995	0.65218	-0.286893	-0.040962	0.318338	0.274105	0.397607	-0.049179	-0.029602	0.0410791	0.195648	0.071204	0.125081	0.17478	-0.117263	0.158524	0.113618	0.301732	0.026034	-1.12004	0.345432		14	4
RP11-541J2	1	160910438	161094461	-0.214744	-0.318636	0.350768	0.018123	0.395801	0.263798	0.264273	0.316046	0.029058	0.250276	0.467551	0.141707	-0.183642	0.650816	-0.252871	-0.041348	0.244784	0.345014	0.089724	0.02135	-0.000427	0.000556	0.23622	0.078547	0.025442	0.073706	-0.106292	0.178062	-0.015817	0.224051	0.085918	-1.14907	0.323809		14	4
RP11-480N10	1	161092462	161167412	-0.188481	-0.391792	0.309459	-0.026637	0.289141	0.204334	0.140015	0.356347	0.080008	0.187738	0.493235	0.227702	-0.0593709	0.680025	-0.333207	-0.065436	0.306155	0.265634	0.115293	0.00592	0.049243	-0.036674	0.195744	0.018843	0.049725	0.125648	-0.174452	0.20187	-0.011549	0.164755	0.045687	-1.1024	0.303356		14	4
RP11-77G8	1	161165413	161254919	-0.274035	0.846405	0.364626	-0.0718301	0.316397	0.290677	0.237786	0.292371	0.190475	0.296816	0.632907	0.179668	0.139293	0.591543	-0.151478	-0.00674	0.299331	0.409326	0.15531	0.086122	0.052055	-0.0164502	0.209437	0.029933	0.114298	0.111961	-0.113914	0.272173	0.133337	0.210039	0.091317	-0.905589	0.342395		14	3
RP11-503N16	1	161252920	161273728	-0.398336	-0.007303	0.260159	-0.145849	0.230687	0.301467	-0.01669	0.238005	0.090613	0.215376	0.52619	0.073357	-0.130095	0.480568	-0.322215	-0.125916	0.060591	0.234639	0.129835	0.067168	0.029685	-0.16091	0.156907	-0.109331	-0.02117	-0.039442	0.024353	0.182716	0.014534	0.056965	-0.016241	-1.42818	0.242362		14	3
RP11-477H21	1	161271765	161468494	-0.420172	-0.602084	0.179012	-0.107448	0.186051	0.200716	0.013642	0.175041	0.102587	0.242855	0.616211	-0.035847	-0.159641	0.424872	-0.520065	-0.12081	0.084018	0.226208	0.079332	0.093075	0.034208	-0.204245	0.157861	-0.144321	-0.070778	-0.053031	-0.219805	0.162162	-0.001016	0.021584	-0.061333	-1.43795	0.265914		14	3
RP11-506O24	1	161466495	161537853	-0.395359	0.591968	0.291206	-0.170225	0.171413	0.342193	-0.096978	0.124892	0.107542	0.292434	0.716901	0.0181045	-0.184161	0.429762	-0.385246	-0.060358	0.091755	0.230583	0.063971	0.077981	-0.035727	-0.180515	0.136395	-0.111645	-0.120357	-0.040781	0.019866	0.156136	0.093864	0.089201	0.029464	-1.45378	0.284079		15	3
RP11-403P14	1	161535854	161733335	-0.412803	0.124082	0.145485	-0.260672	0.204573	0.283577	-0.154157	0.108496	-0.0214	0.150592	0.830878	0.0232352	-0.249557	0.400481	-0.485795	-0.139718	-0.064239	0.070334	0.133792	0.076549	-0.041769	-0.178064	0.099356	-0.0973778	-0.063343	-0.107878	-0.057165	0.148241	-0.003959	-0.07909	-0.061734	-1.3946	0.171723		15	3
RP11-2A6	1	161731336	161895348	-0.363922	0.262426	0.206831	-0.157998	0.087717	0.36542	-0.050792	0.16798	0.050573	0.225609	0.755186	-0.038707	-0.125744	0.468076	-0.506879	-0.196592	0.005446	0.105375	0.116733	0.0639518	-0.050778	-0.201047	0.191086	-0.135534	0.009203	-0.06327	-0.152775	0.202036	0.050604	0.082642	-0.058852	-1.21579	0.212878		15	3
RP11-180L13	1	161848061	162032317	-0.444816	1.01413	0.191212	-0.133136	0.227294	0.185615	-0.101052	0.18029	0.016082	0.304025	0.565737	0.042978	-0.171632	0.41874	-0.478539	-0.120397	-0.000156	0.281306	0.004976	0.066712	0.00648	-0.280972	0.068711	-0.164315	-0.068071	-0.111125	-0.209938	0.113408	-0.014367	0.077233	-0.079537	-1.2122	0.318319		15	3
RP11-38C18	1	161893349	162011107	-0.513494	0.988422	0.369334	-0.041563	0.266358	0.520291	-0.035092	0.167995	-0.03903	0.294096	0.644362	0.0550562	-0.153619	0.473327	-0.607848	-0.15513	0.068455	0.220197	0.163854	0.071009	-0.084516	-0.28015	0.121491	-0.093491	-0.067035	-0.083349	-0.0463431	0.173037	0.073005	0.08029	-0.060234	-1.37473	0.291411		15	3
RP11-238F10	1	162009109	162044228	-0.395767	0.874615	0.210565	-0.197407	0.176775	0.407273	-0.203532	-0.002737	-0.057099	0.352756	0.695814	0.014512	-0.116087	0.50175	-0.63382	-0.129446	-0.144354	0.119064	0.189506	0.080105	0.015737	-0.295206	0.09076	-0.201029	-0.124273	-0.146911	-0.120809	0.176651	0.039088	0.024322	0.006775	-1.38396	0.233628		15	3
RP11-280O1	1	162042229	162197597	-0.007432	0.291522	0.140932	-0.034604	0.13515	0.227773	0.021398	-0.114627	0.031751	0.292532	-0.07305	-0.055448	0.21214	0.263421	0.380038	-0.197056	-0.091081	0.095006	0.537607	0.007792	-0.034863	0.047134	0.118734	-0.022594	-0.321471	-0.009172	-0.276178	-0.048553	-0.023065	-0.294407	0.108874	0.055343	0.087531		15	3
RP11-541H12	1	162195598	162276054	-0.356762	0.973336	0.27658	-0.165621	0.159351	0.471823	-0.07612	0.089568	-0.06705	0.304352	0.769237	0.0547102	-0.049918	0.459443	-0.589762	-0.157847	-0.020619	0.283411	0.18829	0.040669	0.007419	-0.236937	0.132851	-0.074672	-0.002652	-0.082399	-0.101072	0.233207	0.037162	0.102416	-0.03732	-1.37706	0.291411		16	3
RP11-306I1	1	162274055	162349968	-0.372044	0.788391	0.264053	-0.11265	0.186453	0.243233	-0.021421	0.213735	-0.029851	0.323831	0.734213	0.0627498	-0.073189	0.488905	-0.367559	-0.120185	0.057801	0.260787	0.142782	0.060822	0.060088	-0.16767	0.167452	-0.146773	-0.010105	-0.062917	-0.0496216	0.268896	0.019127	0.138637	-0.005128	-1.21449	0.303799		16	3
RP11-466F5	1	162347969	162536185	-0.200666	0.445152	0.390253	-0.039325	0.23069	0.283949	0.110152	0.330794	0.060353	0.388112	0.6437	0.084635	0.079463	0.699847	-0.240321	-0.04878	0.204927	0.365762	0.197036	-0.038489	0.036274	0.026705	0.277087	0.111011	0.090788	0.085359	0.036493	0.313918	0.016549	0.286592	0.113365	-1.04183	0.400691		16	3
RP11-525G13	1	162534186	162634051	-0.242211	-0.13138	0.446895	0.04905	0.285638	0.436124	0.190344	0.245396	-0.006905	0.298117	0.658255	0.17112	0.106036	0.573326	-0.304478	-0.012199	0.236726	0.408551	0.25138	0.077615	-0.0325	-0.056823	0.224873	0.160087	-0.007237	0.074049	-0.05594	0.276517	0.100154	0.200327	0.071113	-1.03916	0.37379		15	3
RP11-7G12	1	162632052	162753015	-0.342975	-0.345182	0.319578	-0.032312	0.220065	0.280064	-0.012113	0.146567	-0.009134	0.291513	0.60091	0.196574	-0.041404	0.592735	-0.445256	-0.057729	0.072189	0.361938	0.200126	0.116191	0.053917	-0.122117	0.209647	-0.00237	-0.03687	0.00454	-0.0877841	0.252458	-0.002361	0.055531	0.075276	-1.21052	0.225916		15	4
RP11-9L18	1	162820901	163001618	-0.361045	-0.492125	0.139018	-0.194623	0.213047	0.275826	-0.040874	0.107246	-0.110578	0.090917	0.593173	-0.060995	-0.127089	0.377169	-0.547178	-0.181544	-0.072951	0.335123	0.048714	0.121836	0.197083	-0.229805	0.172616	-0.049739	-0.023227	-0.1098	0.07922	0.260017	0.048514	0.031305	0.034064	-1.02934	0.170041		15	4
RP11-479J7	1	162999619	163102151	-0.315142	0.123413	0.177646	-0.171957	0.252318	0.29519	0.029857	0.18291	-0.155816	0.061446	0.65315	-0.026568	-0.190808	0.607936	-0.569414	-0.139864	-0.017276	0.269556	0.078795	0.087909	0.21504	-0.112058	0.249394	-0.059142	-0.016323	-0.054289	0.058535	0.27536	-0.009236	0.088571	0.071369	-1.15024	0.153403		15	3
RP11-276E17	1	163100152	163268988	0.097912	0.063647	0.123062	-0.022198	0.013977	-0.108586	0.290858	0.43525	0.035435	-0.184123	0.029432	0.144928	-0.077477	0.155627	0.328786	0.037901	0.2254	0.263358	0.247703	-0.022693	0.043797	0.210672	0.073001	0.586867	-0.479473	0.087836	-0.116066	0.001858	0.067644	0.144732	-0.046306	-0.384223	0.251147		15	3
RP11-45J16	1	163266994	163350044	-0.271821	1.15964	0.260297	-0.013363	0.337244	0.24727	0.18345	0.327949	-0.039634	0.187403	0.526889	0.183788	-0.222936	0.583634	-0.290454	-0.088448	0.243759	0.461515	0.0789	0.040587	0.197839	-0.053173	0.129075	0.069353	-0.070768	0.067896	0.071383	0.207484	0.022348	0.160997	0.017215	-0.999155	0.361395		16	3
RP11-54B9	1	163348045	163466469	-0.169409	0.973089	0.161691	-0.136086	0.132445	0.180487	0.058041	0.258483	0.062256	0.019094	0.527505	0.238432	-0.207293	0.456655	-0.320691	-0.095765	0.198761	0.27945	0.052028	0.018679	0.212082	0.019657	0.214956	-0.018144	0.069602	0.036797	-0.0401368	0.210332	0.110692	0.167703	-0.097277	-0.974128	0.273588		16	3
RP1-9E21	1	163466370	163573346	-0.268004	1.14152	0.345608	-0.069276	0.088606	0.349397	0.007454	0.168127	-0.012551	0.407591	0.61027	0.172633	0.019152	0.600312	-0.370922	-0.025291	0.104848	0.244155	0.35592	0.171332	0.147663	-0.069743	0.301724	-0.016039	0.057604	0.041209	-0.0447659	0.277612	0.056228	0.082148	0.021078	-1.056	0.371866		16	3
RP4-782G3	1	163573247	163684266	-0.338199	0.922633	0.269147	-0.099678	0.16417	0.460881	-0.127351	0.076795	-0.020967	0.2471	0.554055	0.0460302	-0.135524	0.528191	-0.333318	-0.07795	-0.020929	0.082896	0.162683	0.0795929	0.174355	-0.200202	0.227626	-0.123545	-0.00112	-0.052505	0.063568	0.253454	0.043764	0.042992	-0.000851	-1.4745	0.273471		16	3
RP11-102C16	1	163684167	163833015	-0.341321	0.912821	0.113418	-0.291396	0.203588	0.312894	0.002776	0.147505	0.0326	0.275851	0.612161	0.180927	-0.160658	0.350589	-0.550374	-0.173771	0.000919	0.385153	0.072358	0.0638174	0.181331	-0.19807	0.06289	-0.090396	-0.092811	-0.088979	0.118002	0.235597	0.040319	0.073543	-0.010218	-1.14417	0.291428		16	3
RP11-277B15	1	163831016	163953431	-0.376797	0.797469	0.157356	-0.262373	0.211159	0.135075	-0.108632	0.10191	-0.013976	0.111632	0.540285	0.047359	-0.140468	0.331369	-0.497771	-0.14923	-0.046025	0.244913	0.054295	0.049382	0.111904	-0.251005	0.084457	-0.160196	-0.117284	-0.10405	-0.001986	0.188162	-0.001827	0.059122	-0.032997	-1.24308	0.227248		16	3
RP11-104L21	1	164119059	164186231	-0.402546	0.728417	0.16663	-0.273122	0.121294	0.336932	-0.143094	0.0538	0.115373	0.376141	0.523564	0.05298	0.002934	0.395253	-0.483411	-0.177821	-0.033835	0.084654	0.129098	0.08107	0.045218	-0.207406	0.064562	-0.182085	-0.056023	-0.100558	-0.150315	0.280085	0.070879	-0.087718	-0.080017	-1.2206	0.280922		16	3
RP3-455J7	1	164184232	164400092	-0.414869	0.797704	0.225558	-0.258698	0.198072	0.295389	-0.102694	0.107961	0.165448	0.398374	0.554578	-0.010495	0.159914	0.389265	-0.465336	-0.167004	-8.9e-05	0.111545	0.154243	0.030916	0.012744	-0.177849	0.112824	-0.134304	-0.101207	-0.114712	-0.135976	0.300545	0.10952	0.031583	-0.051457	-1.23546	0.419213		16	3
RP3-503M14	1	164399993	164424698	-0.251408	0.982283	0.323294	-0.166631	0.237474	0.352823	-0.078558	0.179495	-0.003634	0.320955	0.515453	0.0886756	0.156019	0.580207	-0.494573	-0.097116	0.06433	0.246702	0.062952	0.13881	0.036982	-0.10316	0.188167	-0.0786771	-0.050092	0.003404	-0.048743	0.34999	0.059024	0.075444	0.079922	-1.27326	0.264198		16	3
RP1-313L4	1	164424599	164552828	-0.203467	1.0936	0.466056	0.072879	0.326144	0.357488	0.140611	0.339573	0.048327	0.322482	0.591143	0.23212	0.067429	0.676947	-0.270312	-0.039992	0.162546	0.39089	0.129932	0.0492782	0.050509	0.023662	0.327985	0.111299	0.033402	0.061592	0.019018	0.332783	0.034968	0.234239	0.188303	-1.31607	0.253164		17	3
RP1-295C6	1	164546935	164649192	-0.272654	0.827188	0.30108	-0.18525	0.276914	0.20427	0.005317	0.298263	0.174936	0.378042	0.480477	0.101413	0.029261	0.492315	-0.090545	-0.04493	0.141835	0.124218	0.214184	0.070317	-0.002496	-0.039648	0.094187	-0.027629	-0.037814	-0.056446	-0.177658	0.164602	0.053502	0.211761	0.02953	-1.03065	0.341945		17	3
RP4-703H14	1	164649093	164723821	-0.031236	-0.091747	0.459061	0.067809	0.355158	0.3154	0.233295	0.455612	0.138627	0.348253	0.560967	0.035673	0.018572	0.723319	-0.170784	-0.02714	0.280508	0.367899	0.147	0.042065	-0.0833	0.119976	0.265705	0.246526	0.057988	0.179376	0.102544	0.246004	0.138928	0.25365	0.115481	-1.06155	0.554674		16	3
RP4-702J19	1	164723722	164772159	-0.264446	-0.096685	0.305454	-0.002705	0.236719	0.317453	0.017441	0.31266	0.188982	0.326404	0.544801	0.029402	0.01178	0.529788	-0.203602	-0.106261	0.218741	0.1949	0.085486	0.094351	0.04394	-0.058202	0.217003	-0.021218	0.034156	0.037785	0.031067	0.214517	0.057642	0.129889	0.039577	-1.19281	0.321807		16	3
RP4-745I14	1	164772060	164853690	-0.398943	-0.678122	0.226135	-0.215089	0.225146	0.269065	-0.116004	0.113126	0.112672	0.309578	0.585012	-0.000823	-0.060244	0.438357	-0.473682	-0.163453	0.015272	0.095302	0.027485	0.029597	0.033068	-0.234825	0.095788	-0.193718	-0.069793	-0.138621	-0.200909	0.250924	0.055606	-0.026603	-0.076507	-1.26856	0.363026		16	4
RP1-69E11	1	164853591	164917506	-0.086331	-0.260956	0.235384	-0.204754	0.224664	0.214205	0.046289	0.283938	-0.038347	0.172183	0.491698	-0.005616	-0.057302	0.545672	-0.466816	-0.041526	0.085461	0.187294	0.20411	0.108666	-0.002367	-0.034579	0.191784	0.061788	-0.041714	0.062996	-0.194513	0.160398	0.012924	0.122075	0.009232	-0.597083	0.218588		16	4
RP5-1059H15	1	165023622	165117202	-0.340819	-0.43673	0.205602	-0.117693	0.136961	0.328943	-0.047186	0.134006	0.124472	0.271028	0.509636	0.065036	-0.015329	0.342195	-0.170927	-0.148559	-0.001038	0.172667	0.146089	0.055725	0.004404	-0.163103	0.144266	-0.097927	-0.009237	-0.025394	0.008397	0.184076	0.084808	-0.028428	-0.021705	-0.969252	0.317983		16	4
RP5-968D22	1	165117103	165204816	-0.371796	-0.545853	0.254608	-0.124169	0.189759	0.2369	-0.075234	0.247198	0.230713	0.284776	0.513186	0.06519	0.118385	0.395501	-0.336932	-0.049242	0.137212	0.180362	0.104604	0.08995	0.049626	-0.095335	0.227742	-0.126816	0.049224	-0.010321	-0.142377	0.195745	0.044259	0.091614	-0.03451	-1.26337	0.381511		16	4
RP5-1082D3	1	165204717	165215802	-0.316706	-0.466732	0.252547	-0.064247	0.129865	0.214763	-0.027819	0.266257	0.166136	0.249656	0.496597	0.033755	0.020203	0.451031	-0.247461	-0.134724	0.160001	0.196737	0.076979	0.109334	0.056448	-0.062587	0.164087	-0.088556	-0.007216	0.01502	-0.021048	0.175359	0.065554	0.099867	-0.012708	-1.24012	0.320341		16	4
RP4-738P11	1	165215703	165363121	-0.299282	-0.390954	0.256999	-0.181798	0.323761	0.323116	0.05082	0.272407	0.119711	0.282626	0.612215	-0.044453	-0.059164	0.500653	-0.398622	-0.140357	0.010429	0.178441	0.034961	0.083499	-0.008055	-0.206783	0.069567	-0.113684	-0.073428	-0.046743	-0.223155	0.167951	0.069561	0.120884	0.0112	-1.29866	0.44096		16	4
RP5-968A20	1	165363023	165382967	-0.411657	-0.173192	0.265621	-0.143286	0.285657	0.240143	-0.019233	0.310213	0.091091	0.239279	0.376317	-0.002636	-0.098885	0.494592	-0.403786	-0.141973	0.071574	0.261019	-0.00774	0.0402	0.01715	-0.157134	0.152379	-0.089727	-0.035469	-0.028749	-0.281741	0.128259	-0.023566	0.141622	-0.036946	-1.42812	0.234361		16	4
RP4-797M17	1	165382868	165457689	-0.300371	-0.626905	0.283331	-0.131648	0.255115	0.226625	-0.025645	0.288131	0.086775	0.191943	0.307326	0.04744	-0.209404	0.485838	-0.346581	-0.105657	0.111037	0.248391	0.01209	0.03755	-0.006185	-0.17716	0.182396	-0.081388	-0.018145	-0.01937	-0.115795	0.134882	0.006654	0.115302	-0.010377	-1.51175	0.267399		16	4
RP1-10C16	1	165457590	165567410	-0.247827	-0.454381	0.331125	-0.010919	0.324831	0.388319	0.180968	0.40311	0.112439	0.303017	0.3168	0.196756	-0.123834	0.602624	-0.287225	-0.176243	0.210951	0.406765	0.055935	-0.091281	0.02452	-0.059511	0.241236	-0.019033	0.041679	0.048493	-0.168026	0.172914	0.0062	0.222002	-0.021929	-1.42437	0.365368		16	4
RP11-375F2	1	165567311	165725829	-0.255896	-0.33801	0.407127	-0.044478	0.330373	0.422559	0.045942	0.240216	0.024778	0.203068	0.417218	0.10614	-0.128663	0.598795	-0.278554	-0.061368	0.051635	0.158371	0.183579	0.111413	-0.014908	-0.122773	0.209052	-0.029839	0.089769	-0.001138	0.006163	0.231154	0.086128	0.110996	0.074136	-1.21755	0.271459		16	4
RP11-287J1	1	165723831	165743147	-0.314589	-0.570644	0.304983	-0.106209	0.199207	0.307904	0.007239	0.165649	0.053949	0.305678	0.274993	0.024184	-0.174419	0.51273	-0.54772	-0.142855	0.076945	0.158337	0.03511	-0.019955	-0.027928	-0.186911	0.175986	-0.115461	-0.02281	-0.008428	-0.047406	0.220121	0.059123	0.064253	-0.026511	-1.41545	0.361435		16	4
RP5-1018K9	1	165741149	165894772	-0.32863	-0.391496	0.324104	-0.001508	0.296521	0.243824	0.093581	0.294708	0.065593	0.213437	0.306739	0.146562	-0.12927	0.587972	-0.323593	-0.186057	0.197478	0.385289	0.066819	0.077527	0.051464	-0.060739	0.264605	0.026534	0.045069	0.027659	-0.24142	0.267047	-0.026917	0.191331	0.021574	-1.4721	0.1921		16	4
RP4-800F24	1	165892773	166033560	-0.16552	0.189601	0.383971	0.040749	0.437836	0.237958	0.107624	0.298619	0.15817	0.191083	0.324767	0.147561	-0.161417	0.516219	0.0909	-0.033652	0.25365	0.149227	0.148302	0.100713	0.023455	0.012434	0.133656	0.155525	0.040113	0.094342	0.003438	0.169782	0.034295	0.319658	0.048284	-0.960571	0.254146		16	3
RP1-206D15	1	166086309	166187882	-0.064337	1.02765	0.335778	0.052714	0.341424	0.283319	0.259316	0.446302	0.157327	0.247498	0.232673	0.195145	0.085559	0.600352	-0.276686	-0.009378	0.306758	-0.132411	0.096387	-0.044703	0.028575	0.100729	0.197961	0.115417	0.070385	0.174072	-0.151112	0.149681	0.073871	0.270194	0.019128	-1.08153	0.331949		16	3
RP1-86F14	1	166187779	166294349	-0.201737	0.948134	0.280095	-0.039522	0.240396	0.256445	0.122721	0.404168	0.15457	0.136288	0.250735	0.139959	-0.019228	0.60854	-0.42165	-0.065011	0.335282	-0.153506	0.120317	-0.0115707	0.043103	0.096971	0.229163	0.049016	0.066563	0.089328	-0.247446	0.195171	-0.003737	0.207615	0.007024	-1.32481	0.209671		16	3
RP4-780M13	1	166294250	166372274	-0.206257	1.0319	0.041657	0.000319	0.33167	0.258414	0.086202	0.368218	0.0964969	0.505564	0.795169	0.175671	0.46091	0.522192	-0.0625747	-0.033401	0.282042	-0.14692	0.619664	0.176383	0.182689	0.034664	0.358176	0.047637	0.402268	0.032722	-0.150154	0.181457	0.072984	0.203061	0.109984	-0.357367	0.13635		16	3
RP3-497B8	1	166616745	166620621	-0.183505	1.04999	0.341903	0.052621	0.339236	0.314549	0.089056	0.363401	0.112881	0.298475	0.311408	0.190201	0.057943	0.549726	-0.086092	-0.024854	0.205186	-0.070728	0.167542	0.125348	0.112082	0.12985	0.328817	0.007167	0.176353	0.085755	0.032711	0.278118	0.052416	0.247782	0.07005	-1.00668	0.51468		16	3
RP1-190I16	1	166620522	166709398	0.032248	1.33097	0.557778	0.303448	0.29985	0.478861	0.50054	0.653543	0.134629	0.27945	0.423474	0.537471	0.108521	0.764889	0.095536	0.067392	0.474974	0.123467	0.255557	0.1585	0.082699	0.29956	0.438667	0.354662	0.317012	0.183838	-0.19843	0.226001	0.084639	0.439951	0.172236	-0.51511	0.437299		16	3
RP11-332H17	1	166707400	166815446	0.001495	1.22235	0.540646	0.118574	0.376054	0.166424	0.32583	0.541424	0.120019	0.337395	0.418297	0.291496	-0.003589	0.757074	-0.043132	0.095466	0.382192	-0.055917	0.21804	0.127594	-0.037071	0.266838	0.327004	0.379743	0.077662	0.239677	-0.0528595	0.247035	0.063492	0.363076	0.099681	-0.883194	0.379556		16	3
RP11-212E1	1	166813447	166817440	-0.10231	1.16839	0.568731	0.09728	0.424656	0.206875	0.168363	0.40651	0.070535	0.278619	0.405271	0.195595	-0.080321	0.717689	-0.22259	0.032414	0.269715	-0.077473	0.194047	0.216623	-0.043417	0.09536	0.320607	0.214089	0.05743	0.132251	0.015581	0.170854	0.1467	0.344632	0.178456	-0.81245	0.365866		16	3
RP11-297H3	1	166815441	166989883	-0.295721	1.07016	0.434583	-0.095671	0.228397	0.314918	0.115329	0.261573	-0.029835	0.365209	0.33871	0.167421	-0.072989	0.692971	-0.350397	-0.052794	0.102183	-0.146549	0.153549	0.009002	0.024072	0.023522	0.276725	0.12276	0.044959	0.031681	-0.037599	0.287327	-0.005162	0.221246	0.106185	-1.02697	0.384323		16	3
RP11-349E20	1	166987884	167069366	-0.238208	0.972088	0.335134	-0.169926	0.17611	0.319585	-0.023233	0.250783	-0.034387	0.326352	0.418958	0.12987	-0.067424	0.602218	-0.509625	-0.096973	0.055034	-0.282997	0.239939	-0.020378	-0.004057	-0.104088	0.209001	-0.045003	0.029556	-0.017814	-0.324481	0.218595	-0.034777	0.216363	0.02048	-1.18326	0.296867		16	3
RP11-576I22	1	167067367	167206609	-0.109095	1.05985	0.437002	0.019053	0.331932	0.254309	0.111428	0.338827	0.122963	0.233754	0.296577	0.195638	0.040066	0.698248	-0.158248	0.015416	0.198587	-0.277399	0.241734	-0.029845	0.027098	0.133214	0.294182	0.161613	0.03124	0.057137	0.013358	0.248054	0.083739	0.360774	0.155791	-1.11873	0.319545		16	3
RP11-545I10	1	167204610	167296248	-0.202829	0.976168	0.356348	-0.073485	0.227561	0.300313	0.124897	0.350108	0.263268	0.400642	0.324079	0.068803	0.073638	0.534846	-0.483207	-0.104487	0.21011	-0.327225	0.150415	-0.260147	-0.006975	-0.003314	0.179423	0.021606	-0.021207	0.08109	-0.046623	0.252336	0.098996	0.229447	-0.001287	-1.11065	0.403082		16	3
RP4-681G13	1	167294250	167322233	-0.301399	0.962996	0.260371	-0.116516	0.254166	0.142246	0.048581	0.320811	0.182821	0.252625	0.332117	0.163972	0.066538	0.418629	-0.315989	-0.09735	0.188404	-0.283539	0.052272	-0.162108	0.095884	-0.051899	0.233247	-0.041971	0.06504	-0.020654	-0.058697	0.245229	-0.022417	0.169041	-0.019567	-0.990957	0.292339		15	3
RP1-58A9	1	167480583	167606929	-0.147074	0.76526	0.246172	-0.012149	0.190262	0.162387	0.081824	0.21733	-0.147768	0.240379	0.110184	0.168795	-0.166444	0.535812	-0.308104	-0.028582	0.200778	-0.012448	0.019171	-0.21907	-0.020246	0.006016	0.064786	0.107379	-0.083735	0.074385	-0.22629	0.188513	-0.007833	0.191315	0.067585	-0.487055	0.322548		15	3
RP3-355N11	1	167606830	167685165	-0.162767	1.12233	0.374052	0.042465	0.290966	0.250385	0.182873	0.400545	0.081447	0.111273	0.276135	0.303344	-0.100676	0.627258	-0.298446	-0.007753	0.259541	0.020672	0.036743	-0.200184	0.100209	0.027138	0.329201	0.072264	0.077586	0.083024	-0.129	0.265179	-0.025917	0.277546	0.077764	-1.13873	0.235445		15	3
RP1-127D3	1	167787742	167949816	-0.133528	1.07001	0.345557	-0.019383	0.32161	0.188792	0.094516	0.375101	-0.064681	0.158242	0.250846	0.26099	-0.133275	0.539319	-0.293552	-0.0706	0.171632	-0.079074	0.014123	0.073798	0.092192	-0.022131	0.274065	0.063337	0.064217	0.046078	-0.093962	0.30305	-0.009347	0.155682	0.014656	-1.15112	0.24694		15	3
RP1-45C12	1	167947817	167961708	-0.218497	1.05007	0.350286	-0.070197	0.297447	0.237685	0.179175	0.417212	0.011942	0.332809	0.240589	0.231128	-0.09772	0.596949	-0.425215	-0.058064	0.153724	-0.103284	0.073704	0.060369	0.023171	-0.042286	0.181875	0.004483	0.038665	0.029426	-0.347649	0.227363	-0.02364	0.19641	-0.043697	-1.10677	0.281978		15	3
RP4-798A17	1	167959709	168090175	-0.303928	0.857351	0.227028	-0.186896	0.239606	0.084888	-0.00375	0.213694	0.059067	0.160717	0.343216	0.123365	-0.128695	0.42135	-0.298415	-0.09737	0.01338	-0.188652	0.106257	0.038208	0.080004	-0.162969	0.113163	-0.1194	0.043693	-0.096742	-0.047811	0.182658	-0.023983	0.109492	-0.046302	-0.965787	0.272539		15	3
RP1-81F6	1	168090076	168190650	-0.285781	1.02049	0.371085	-0.011407	0.280019	0.158815	0.033489	0.193362	-0.018825	0.187295	0.324324	0.073897	-0.041653	0.523251	-0.147026	-0.041989	0.074321	-0.033275	0.035415	0.072574	0.070106	-0.063765	0.21192	0.037104	-0.017596	0.028199	0.014843	0.270464	-0.004728	0.021227	0.048471	-1.03464	0.271278		15	3
RP4-598F2	1	168190551	168290436	-0.127138	1.24598	0.390433	0.068672	0.301356	0.324514	0.25628	0.439656	0.011445	0.330594	0.299763	0.356859	0.039939	0.685636	0.02606	0.039529	0.262437	0.058311	0.109051	0.132634	0.08589	0.087293	0.35699	0.162755	0.098672	0.158095	-0.0566179	0.37546	-0.014748	0.179557	0.097062	-0.650829	0.358031		15	3
RP3-454G6	1	168290337	168369712	-0.236087	0.870164	0.190105	-0.053279	0.185336	0.184541	0.02416	0.124368	-0.049741	0.251825	0.233325	0.118707	-0.011528	0.414103	-0.261875	-0.139014	0.065859	0.07128	0.027494	0.028985	0.051206	-0.0945	0.213639	-0.053491	0.019222	-0.077282	-0.0444049	0.283898	-0.026441	0.113336	0.03443	-0.523703	0.331918		15	3
RP5-932N9	1	168468581	168479657	-0.284764	1.07648	0.236163	-0.177384	0.226054	0.311143	-0.001219	0.247709	0.043588	0.277188	0.411716	0.125795	0.029309	0.482883	-0.385255	-0.189223	0.053581	-0.041341	0.04643	0.165165	0.117554	-0.10212	0.181888	-0.007714	0.050425	-0.116369	-0.048155	0.324831	0.061965	0.122623	0.083998	-1.16551	0.385939		15	3
RP4-612B18	1	168479558	168594860	-0.311882	0.882119	0.197139	-0.220247	0.175574	0.270409	-0.075159	0.260389	0.035816	0.263926	0.393328	-0.031666	0.100345	0.427712	-0.5452	-0.222264	-0.061635	-0.233293	-0.016843	0.208382	0.08876	-0.211325	0.153177	-0.129016	0.035713	-0.162947	-0.059497	0.315874	0.064578	0.081521	0.089625	-1.10499	0.200047		15	3
RP11-277C14	1	168594761	168750701	-0.161195	1.04767	0.357278	-0.065557	0.260888	0.251962	-0.024745	0.319072	0.022984	0.121167	0.339249	0.176924	-0.174789	0.548219	-0.372796	-0.040128	0.106932	-0.165689	0.141771	0.04651	0.0182881	-0.095765	0.154903	-0.018433	-0.038186	0.081985	-0.164383	0.178568	0.031948	0.176511	0.04043	-1.06044	0.30165		15	3
RP11-184O20	1	168750602	168826285	-0.133892	0.955053	0.35676	0.022344	0.286925	0.252835	0.087318	0.383184	0.108171	0.1869	0.257145	0.271166	-0.161681	0.685706	-0.209456	-0.030408	0.210521	-0.18696	0.164586	0.027242	-0.024511	0.0313145	0.21204	0.071777	-0.001887	0.049541	0.004381	0.208533	0.070434	0.120479	0.042234	-1.18565	0.189991		15	3
RP11-103A6	1	168935433	168977850	-0.114947	1.00372	0.327171	-0.01914	0.253416	0.318252	0.210654	0.444456	0.131778	0.192098	0.219357	0.185835	0.014814	0.584078	-0.370696	-0.086034	0.309811	-0.210812	0.110227	0.023422	-0.01929	0.053097	0.249377	0.02077	-0.003226	0.108257	-0.101766	0.190709	0.022893	0.138236	0.005819	-1.11866	0.29099		15	3
RP1-106H8	1	169054815	169230639	-0.173798	0.883659	0.34734	-0.12122	0.235272	0.373301	0.181223	0.364813	-0.034492	0.322172	0.476338	0.148831	-0.051639	0.511552	-0.410937	-0.061409	0.125102	-0.038014	0.10135	0.086456	0.1268	0.069018	0.308723	0.12159	0.082652	0.022285	-0.03349	0.306757	-0.049878	0.301708	0.119677	-0.994993	0.338626		15	3
RP1-125H23	1	169230536	169283151	-0.192918	-0.447167	0.279533	-0.131368	0.225006	0.374206	0.073766	0.222464	-0.125437	0.170548	0.484861	0.095903	-0.047642	0.537791	-0.513239	-0.067997	0.02562	-0.14165	0.119738	0.072963	0.114683	-0.027407	0.308337	-0.007521	0.123083	-0.047877	-0.034925	0.305416	-0.042495	0.217057	0.095717	-0.855586	0.390188		15	3
RP1-105D12	1	169283048	169368858	-0.171935	-0.369637	0.267299	-0.151142	0.217274	0.356725	0.002762	0.299265	-0.126419	0.185664	0.55148	0.124727	0.001489	0.56808	-0.527576	-0.046989	0.020619	-0.1628	0.085323	0.135094	0.136628	-0.104907	0.325014	-0.021918	0.086218	-0.037851	0.037878	0.313148	0.057717	0.186685	0.109535	-0.963898	0.415524		15	3
RP1-300A12	1	169779017	169835870	-0.149413	1.10127	0.38508	-0.091303	0.159745	0.372715	0.101356	0.234803	-0.021589	0.266277	0.322688	0.161728	-0.015831	0.711612	-0.235206	-0.067216	0.110648	-0.250977	0.103911	-0.002324	0.048667	0.00230167	0.27171	0.0497604	0.018639	0.075052	0.119601	0.324482	0.052246	0.043474	0.044301	-1.12111	0.476179		15	3
RP3-395P12	1	169835771	169983494	-0.191304	1.13793	0.430673	0.021636	0.234594	0.302332	0.098128	0.264183	0.039349	0.3218	0.351297	0.182145	-0.041206	0.737284	-0.472664	0.020315	0.064506	-0.175703	0.201105	0.107836	-0.006537	0.021831	0.263661	0.149025	-0.028784	0.061907	-0.287803	0.284095	0.039425	0.162026	0.138973	-1.14328	0.300028		15	3
RP3-436N22	1	170174930	170334700	-0.154725	1.01818	0.321336	-0.088153	0.249532	0.303722	0.071033	0.305011	0.091767	0.252144	0.286128	0.009014	-0.03459	0.57649	-0.33991	-0.089266	0.097679	-0.223119	0.135899	-0.045946	-0.052269	-0.035187	0.230788	0.06124	-0.06839	0.107154	0.042993	0.235369	0.102193	0.20756	0.026744	-1.06529	0.451232		15	3
RP5-1198E17	1	170558160	170687600	-0.044569	1.55275	0.486949	0.295474	0.396631	0.44048	0.421422	0.434474	0.100929	0.241121	0.398931	0.296735	0.274285	0.80356	0.062145	0.0222141	0.325992	0.191401	0.264765	0.17828	0.077867	0.25796	0.421461	0.437433	0.119289	0.326124	-0.221028	0.399129	0.098508	0.433498	0.329	-0.453631	0.589778		15	3
RP11-160H22	1	170687501	170852936	-0.078108	-0.007655	0.443076	0.015117	0.305525	0.223786	0.241847	0.45639	0.244994	0.324731	0.38883	0.152667	0.088453	0.71146	0.030923	-0.0007	0.266	0.020763	0.185433	0.125101	0.025817	0.136854	0.378408	0.299074	-0.01452	0.161919	0.100633	0.317017	0.019026	0.266597	0.125379	-1.03419	0.426955		13	3
RP4-681J21	1	170852837	170921606	-0.12788	-0.18654	0.538665	-0.088855	0.16434	0.389811	0.221628	0.395388	-0.32739	0.203527	0.442727	0.150893	0.065215	0.808393	-0.234159	0.0633	0.102635	-0.155289	0.282557	0.173018	0.047622	0.053864	0.32843	0.110377	-0.072292	0.16337	-0.0100036	0.348949	0.062467	0.332223	0.247967	-0.9362	0.486653		13	4
RP4-809F4	1	170921507	171069841	0.010145	-0.147074	0.45954	0.075629	0.264161	0.373345	0.173429	0.306854	0.05847	0.206388	0.429279	0.179859	0.106073	0.710385	-0.123677	0.059762	0.087555	-0.146562	0.264263	0.144799	0.024599	0.18115	0.395555	0.160704	-0.027426	0.175651	0.062979	0.275166	0.129624	0.377346	0.193023	-0.797914	0.366147		13	4
RP3-384F21	1	171069737	171166615	-0.145064	-0.394886	0.43252	-0.036765	0.304553	0.387311	0.220865	0.422979	-0.293886	0.29457	0.346916	0.16726	-0.157937	0.745727	-0.274627	-0.013682	0.117266	-0.127809	0.168564	0.020274	-0.050468	0.108659	0.239092	0.203152	-0.174492	0.155143	-0.00415025	0.217821	0.115341	0.230633	0.046091	-0.863884	0.332486		13	4
RP5-970D1	1	171200938	171301433	0.044001	-0.21589	0.39772	0.043185	0.324507	0.231145	0.185551	0.322611	-0.17419	0.167115	0.237061	0.309398	-0.152507	0.693687	-0.083761	0.034816	0.122234	-0.11606	0.197469	0.0472532	-0.091558	0.105391	0.260789	0.219961	-0.095621	0.121483	0.093915	0.217758	0.06057	0.227356	0.146403	-0.737176	0.269187		13	4
RP11-11B12	1	171299434	171377194	0.0476763	-0.077573	0.551831	0.164843	0.328239	0.317575	0.34932	0.590428	-0.123615	0.193982	0.450784	0.168806	0.072062	0.822994	-0.113151	0.122559	0.178019	0.129177	0.24341	0.188717	0.089481	0.155353	0.234663	0.260983	0.06456	0.24538	-0.105519	0.220127	0.257348	0.327577	0.20119	-0.428123	0.29741		13	4
RP5-830A10	1	171339593	171455403	-0.109729	-0.232631	0.400747	0.021195	0.222018	0.345361	0.249009	0.399535	-0.370206	0.27409	0.226566	0.181112	-0.019546	0.671974	-0.020365	-0.023428	0.130784	-0.035651	0.129027	-0.017182	-0.024582	0.098274	0.291197	0.178172	-0.109132	0.139941	-0.010548	0.256723	0.039028	0.129803	0.090121	-1.00352	0.53749		13	4
RP11-64I24	1	171453404	171555752	-0.164348	-0.400731	0.331198	-0.033077	0.263399	0.174382	0.133013	0.292364	-0.349156	0.10704	0.344158	0.159343	-0.135135	0.572053	-0.24666	-0.087341	0.046046	-0.104211	0.107744	-0.02732	0.036044	-0.008122	0.195049	0.088418	-0.102429	0.078924	0.018404	0.249687	0.003462	0.162453	0.058439	-1.06623	0.290152		13	5
RP3-433G19	1	171553753	171592317	-0.226579	-0.277417	0.335531	0.023337	0.182505	0.211736	0.161754	0.273822	-0.099073	0.185641	0.548649	0.02925	0.052578	0.535363	-0.206969	-0.082856	0.073396	0.034592	0.075888	0.088143	0.023147	0.017446	0.36376	0.082825	-0.014706	0.060595	-0.118612	0.278826	-0.007173	0.240856	0.118459	-0.967669	0.302245		13	4
RP1-102G20	1	171590318	171714738	-0.070952	-0.180679	0.430515	0.108866	0.29156	0.257386	0.259377	0.533081	0.41766	0.321638	0.497391	0.193502	0.199096	0.749098	0.070222	0.033992	0.290571	0.004313	0.158895	0.077104	0.069176	0.2258	0.376837	0.262361	-0.033196	0.193497	0.066303	0.266521	-0.009198	0.29997	0.269079	-1.15367	0.416825		13	4
RP1-262D12	1	171714636	171815632	-0.268761	-0.511076	0.27211	-0.015945	0.271218	0.385955	0.158849	0.355883	0.48649	0.355906	0.517062	-0.040349	0.126793	0.56595	-0.306103	-0.056072	0.027459	-0.075195	0.055709	0.024501	0.064124	-0.006756	0.178552	0.007192	-0.205478	0.001331	-0.210374	0.188201	0.063851	0.141517	0.28027	-1.19993	0.410583		11	6
RP5-1141O19	1	171815529	171867614	-0.463456	-0.691281	0.205075	-0.157455	0.209738	0.28678	-0.098897	0.220461	0.288715	0.278865	0.492866	-0.043323	-0.053726	0.432624	-0.482672	-0.140536	-0.119821	-0.174784	0.026356	0.037696	0.104369	-0.19682	0.057554	-0.079476	-0.26792	-0.07365	-0.134206	0.016149	-0.000154	0.057558	0.108013	-1.35354	0.211287		10	6
RP5-1114G22	1	171867511	171998136	-0.303275	-0.583663	0.258326	-0.172044	0.211998	0.307704	-0.068725	0.232048	0.027685	0.310009	0.597587	0.020524	-0.132898	0.432774	-0.188985	-0.054113	-0.113464	-0.206177	0.076102	0.015801	0.049469	-0.098468	0.157216	-0.022616	-0.208323	-0.052431	-0.129801	-0.040039	-0.011745	0.114421	-0.000347	-1.20322	0.312855		10	6
RP3-518E13	1	171998037	172078160	-0.417661	-0.666101	0.194324	-0.12004	0.220342	0.387622	-0.015017	0.205412	0.058002	0.368529	0.583405	-0.040883	-0.137799	0.459752	-0.481608	-0.170028	-0.132515	-0.207487	0.01394	0.06615	0.032622	-0.234957	0.097533	-0.102964	-0.290723	-0.087546	-0.206807	-0.03971	0.044923	0.0369	-0.019852	-1.45359	0.349835		9	6
RP1-24M15	1	172078056	172212594	-0.484682	-0.946534	0.09923	-0.393412	0.157321	0.278122	-0.229377	0.070881	0.127425	0.275823	0.517626	-0.09011	-0.264628	0.272343	-0.457194	-0.179664	-0.240085	-0.456019	0.023778	0.092234	0.017554	-0.351877	0.01617	-0.327876	-0.368241	-0.187865	-0.168424	0.017492	0.014266	-0.063721	-0.117202	-1.49586	0.174999		9	6
RP5-1045J21	1	172212495	172351130	-0.566208	-0.831444	0.114177	-0.218861	0.137116	0.354838	-0.20078	0.049496	0.053512	0.234654	0.607003	-0.050728	-0.273109	0.247082	-0.471853	-0.165327	-0.237114	-0.274826	-0.071395	0.107384	0.056493	-0.368842	0.058452	-0.308359	-0.299461	-0.142202	-0.108876	0.050283	0.041265	-0.087835	-0.108668	-1.51598	0.179919		9	6
RP5-838O12	1	172351031	172364089	-0.419239	-0.682839	0.222804	-0.165992	0.176227	0.511097	-0.006355	0.211177	0.073955	0.454402	0.558591	-0.047676	-0.204978	0.431683	-0.477079	-0.165754	-0.189293	-0.203598	0.005603	-0.005909	0.040131	-0.295123	0.072321	-0.149945	-0.256502	-0.132236	-0.291274	-0.022156	0.020968	-0.000925	-0.083122	-1.43259	0.356608		9	6
RP3-474A14	1	172363990	172471341	-0.455535	-0.720967	0.242892	-0.102521	0.268524	0.387808	-0.089682	0.132272	-0.014859	0.364227	0.565492	0.097957	-0.249288	0.48976	-0.537878	-0.108866	-0.108684	-0.113572	-0.039194	0.0474058	-0.016098	-0.243368	0.078104	-0.077279	-0.287899	-0.072071	-0.149739	-0.015459	-0.02771	0.032817	-0.006728	-1.49984	0.138873		9	6
RP11-222A5	1	172469342	172585645	-0.345228	-0.520771	0.272552	-0.16611	0.222873	0.283176	-0.047261	0.22939	0.034548	0.36294	0.5685	0.081347	-0.192998	0.520853	-0.242699	-0.085765	-0.037671	-0.069268	0.007448	0.0508618	0.022786	-0.120131	0.152228	0.011579	-0.252131	-0.043421	-0.076431	0.031768	-0.032554	0.066518	0.042207	-1.37634	0.248124		9	6
RP11-102E20	1	172506198	172663602	-0.248239	-0.363601	0.375346	0.050795	0.212706	0.437435	0.160442	0.34139	0.041933	0.412536	0.578632	0.062706	-0.091897	0.62076	-0.363852	-0.128601	0.040011	0.012992	0.061076	0.041391	0.002236	-0.069257	0.218665	0.078882	-0.198729	0.055716	-0.163131	0.067376	0.007715	0.116446	0.038956	-1.41935	0.287477		9	6
RP11-318C24	1	172583646	172665063	-0.31801	-0.434484	0.364945	-0.029364	0.182225	0.326272	0.063664	0.261359	0.097646	0.283859	0.517388	-0.007047	-0.137433	0.572248	-0.266148	-0.115317	0.057067	-0.163136	0.090119	0.039337	0.017713	-0.03552	0.234796	0.067652	-0.106457	0.045183	-0.162299	0.101446	-0.039483	0.185172	0.003958	-1.21852	0.186891		9	6
RP11-501L15	1	172611432	172804693	-0.120371	-0.306137	0.374852	0.029557	0.19836	0.243375	0.127701	0.361734	0.113071	0.21436	0.575643	0.075575	-0.120473	0.632395	-0.137466	-0.0707	0.108239	-0.127611	0.120264	0.100892	0.038603	0.08574	0.251655	0.157724	-0.073699	0.12859	-0.015995	0.092926	-0.019931	0.193553	0.033472	-1.09704	0.210519		9	6
RP11-492I21	1	172663064	172841286	-0.059853	-0.279988	0.425702	0.030224	0.383167	0.331691	0.301394	0.485224	0.114844	0.216838	0.565805	0.103834	-0.060732	0.677786	-0.209265	-0.022397	0.14278	-0.052474	0.127827	-0.031557	-0.005123	0.114662	0.276933	0.153289	-0.064787	0.133216	-0.12912	0.077443	0.048599	0.281621	0.02574	-0.904548	0.52213		9	6
RP11-415M14	1	172762642	172922232	-0.122027	-0.365424	0.371412	0.023882	0.292629	0.189926	0.175979	0.418566	0.042527	0.243549	0.561823	0.203578	-0.036817	0.678369	-0.135453	-0.021799	0.183096	-0.015394	0.082534	0.081214	0.044175	0.130871	0.245959	0.126819	-0.129451	0.140859	-0.0830503	0.045165	-0.038697	0.255931	0.059995	-0.934914	0.35992		9	6
RP4-652L8	1	173154471	173323305	-0.370545	-0.756258	0.214392	-0.187406	0.151372	0.009583	-0.068642	0.206664	0.120838	0.164166	0.568825	0.055988	-0.240954	0.401815	-0.341151	-0.132308	-0.029154	-0.319974	-0.039859	0.069196	-0.016319	-0.1608	0.110155	-0.149192	-0.31002	-0.0557	-0.108199	-0.120636	-0.029855	-0.028828	-0.089885	-1.52411	0.156489		8	6
RP11-252L24	1	173321306	173393512	-0.386781	-0.657261	0.259508	-0.145225	0.150941	-0.07676	0.029359	0.217115	0.022479	0.071203	0.517023	0.167533	-0.203097	0.485236	-0.429535	-0.07576	0.002803	-0.179996	-0.028269	0.060226	0.029318	-0.13518	0.153743	-0.109164	-0.209803	-0.027484	-0.026777	-0.060614	-0.033368	0.065383	-0.050044	-1.29101	0.229022		8	6
RP1-144B6	1	173391513	173482394	-0.369614	-0.63774	0.219996	-0.144274	0.230499	0.075212	0.05974	0.337778	0.165396	0.305512	0.525971	0.161388	-0.154262	0.400401	-0.421327	-0.085814	-0.056686	-0.174783	-0.017781	0.024833	0.006783	-0.116387	0.117525	-0.143964	-0.193484	-0.056746	-0.245882	-0.099408	0.014172	0.069211	-0.117461	-1.25936	0.245636		8	6
RP4-774I24	1	173480395	173602174	-0.406743	-0.689512	0.184136	-0.182262	0.227502	-0.078788	-0.06032	0.226919	0.113499	0.294178	0.532494	0.142964	-0.190924	0.403164	-0.448922	-0.106026	-0.098607	-0.122209	-0.058975	0.054684	0.03232	-0.184128	0.107982	-0.118808	-0.248777	-0.110863	-0.069787	-0.114319	-0.033103	0.040398	-0.007717	-1.4547	0.225793		8	6
RP3-423N22	1	173602075	173737081	-0.361082	-0.746329	0.200227	-0.148446	0.258	0.012514	0.005814	0.236148	0.06017	0.256694	0.357799	0.145224	-0.253354	0.411822	-0.39086	-0.115063	-0.105842	-0.145971	-0.043269	0.056817	0.020579	-0.202699	0.092178	-0.190023	-0.251815	-0.045075	-0.12613	-0.067422	0.038113	0.042329	-0.051476	-1.37549	0.375728		8	6
RP11-247D3	1	173736982	173776948	-0.423852	-0.78428	0.199042	-0.170308	0.192568	-0.026136	-0.127865	0.183678	0.107924	0.114382	0.252526	0.116687	-0.313666	0.325444	-0.386405	-0.11854	-0.141879	-0.280496	-0.057615	0.078776	0.024328	-0.212012	0.115758	-0.197318	-0.223576	-0.070445	-0.059515	-0.001567	0.047233	-0.083685	-0.095922	-1.28051	0.203652		8	6
RP5-964D12	1	173776849	173923811	-0.27645	-0.682441	0.2638	-0.0981	0.219435	0.0023	0.043298	0.338181	0.152351	0.279761	0.238956	0.259273	-0.244769	0.459947	-0.402092	-0.073854	-0.024824	-0.309877	-0.075418	0.064591	-0.024403	-0.002623	0.051087	-0.139409	-0.220114	-0.064018	-0.350138	-0.081939	0.030437	0.04731	-0.099815	-1.19515	0.260891		8	6
RP5-1026E2	1	173923708	174024125	-0.408285	-0.613356	0.262702	-0.157753	0.2186	0.010793	0.005102	0.256011	0.032055	0.22011	0.255121	0.109616	-0.109179	0.450143	-0.3572	-0.144941	-0.071451	-0.183374	-0.008033	0.036379	0.011385	-0.057033	0.087145	-0.083621	-0.157806	-0.073024	-0.127533	-0.118374	-0.047108	0.074251	-0.043559	-1.23935	0.193603		8	6
RP1-35C21	1	174024026	174115042	-0.356802	0.058366	0.311759	-0.119233	0.266672	-0.109652	-0.040527	0.219174	0.0148044	0.276129	0.214104	0.077694	-0.179076	0.274747	-0.354082	-0.099411	-0.165759	-0.076546	-0.061588	0.084574	0.035157	-0.227944	0.128632	-0.116862	-0.156992	-0.068887	-0.111254	-0.073879	0.017241	0.016123	-0.000967	-1.15197	0.25282		8	6
RP3-371M1	1	174114943	174173600	-0.330239	-0.081708	0.284197	-0.067151	0.292049	0.01814	0.065107	0.2924	-0.005021	0.314718	0.237511	0.119274	-0.139492	0.50707	-0.310856	-0.064938	-0.086068	-0.077577	-0.038145	0.071101	-0.011257	-0.174088	0.105832	-0.090823	-0.230446	-0.04106	-0.254054	-0.101351	-0.005218	0.05562	-0.041424	-1.19861	0.388509		8	6
RP5-831A12	1	174173499	174284037	-0.286065	-0.576386	0.326182	-0.05214	0.327795	-0.041996	0.073549	0.40335	0.15164	0.134345	0.325814	0.19615	-0.202127	0.53778	-0.326307	-0.03425	0.032243	-0.105955	0.010657	-0.0038	-0.01705	-0.088025	0.145075	-0.054756	-0.1713	0.024014	-0.27328	-0.120607	0.033116	0.131697	-0.036262	-0.753317	0.268201		8	6
RP11-147M1	1	174283938	174364489	-0.384071	-0.613356	0.225855	-0.158149	0.219472	-0.034916	-0.033739	0.157637	-0.001564	0.008085	0.229816	0.102747	-0.212226	0.407925	-0.380844	-0.042915	-0.062809	-0.118418	-0.056847	0.033809	-0.013988	-0.083403	0.087423	-0.119176	-0.250763	-0.077008	-0.087787	-0.140728	-0.006823	-0.006271	-0.077301	-1.14078	0.307057		8	6
RP11-63B19	1	174362490	174490381	-0.323623	-0.614328	0.202061	-0.16293	0.223658	-0.075448	0.003185	0.177469	-0.082602	0.009682	0.236931	0.085896	-0.283401	0.26334	-0.335375	-0.057379	-0.077688	-0.104538	-0.064206	0.001052	0.023202	-0.165794	0.070812	-0.03634	-0.199612	-0.067095	-0.014622	-0.058222	0.04784	-0.046429	-0.031217	-1.24373	0.20441		8	6
RP11-163L4	1	174439974	174620290	-0.319158	-0.529275	0.233234	-0.119348	0.282753	0.03946	-0.033945	0.171933	-0.027242	0.188204	0.288653	0.064815	-0.168009	0.391556	-0.450125	-0.063764	-0.120991	-0.029476	-0.059367	0.036484	0.020294	-0.24574	0.064366	-0.04686	-0.20486	-0.102009	-0.112529	-0.090817	0.003858	0.013562	-0.041389	-1.12755	0.254615		8	6
RP4-798P15	1	174534406	174647137	-0.242964	-0.555358	0.308211	-0.081816	0.363355	0.04353	-0.034294	0.259339	0.01949	0.232783	0.334763	0.082079	-0.226554	0.521012	-0.224552	-0.080311	-0.062212	-0.050507	-0.00867	0.077445	0.069728	-0.090312	0.071455	-0.069489	-0.183974	-0.007112	-0.145669	-0.081138	0.009029	0.046254	0.011229	-1.19306	0.252363		8	6
RP11-65O1	1	174645138	174673847	-0.422	-0.573169	0.259655	-0.119125	0.26737	-0.035424	-0.047627	0.190171	0.108301	0.231929	0.321979	0.082584	-0.138704	0.396575	-0.422646	-0.113428	-0.075963	-0.126242	-0.010299	0.087951	0.056296	-0.203129	0.064508	-0.109502	-0.211184	-0.089792	-0.045192	-0.06508	-0.012942	0.057363	-0.029176	-1.25751	0.219231		8	6
RP11-568K15	1	174671848	174791706	-0.313482	-0.701917	0.175962	-0.242706	0.278903	-0.055703	-0.169861	0.163749	0.037401	0.130599	0.297044	0.146758	-0.157036	0.319114	-0.345679	-0.103311	-0.154756	-0.197535	0.009469	0.08631	0.060599	-0.160197	0.048234	-0.188429	-0.186982	-0.091373	-0.089614	-0.046152	0.070797	0.020359	-0.049294	-1.11411	0.306469		8	6
RP11-21M7	1	174789707	174970660	-0.059628	-0.164551	0.446783	0.110148	0.283214	0.064715	0.397021	0.536197	0.054952	0.368792	0.519923	0.368482	0.033807	0.738415	-0.130027	0.022718	0.21234	0.139185	0.289567	0.039772	0.054998	0.184668	0.269479	0.241438	-0.006842	0.13862	-0.31504	0.100764	0.037245	0.353853	0.063588	-0.812883	0.224516		8	5
RP11-312I14	1	174968661	175011945	-0.107038	-0.206264	0.418945	0.095585	0.212715	-0.101871	0.300938	0.361621	-0.064767	0.104137	0.236859	0.26014	0.013019	0.674671	-0.269886	0.013133	0.223784	0.097877	0.05551	-0.010939	0.024326	0.186949	0.310417	0.22544	-0.06571	0.129098	0.045313	0.173046	-0.05892	0.231977	0.070567	-0.816666	0.254609		8	5
RP4-765C7	1	175009946	175118233	-0.105062	0.270096	0.386945	0.052319	0.265636	-0.004023	0.284575	0.472564	0.161977	0.262913	0.23577	0.236323	-0.011158	0.605818	-0.25424	-0.029867	0.206321	-0.071595	0.042806	0.051004	0.013639	0.080093	0.224352	0.099426	0.015208	0.123619	-0.326657	0.159975	0.01239	0.236733	-0.029734	-0.878101	0.331846		8	5
RP4-593C16	1	175116234	175198204	-0.184131	0.947651	0.35891	0.006151	0.290597	-0.074484	0.249225	0.377884	0.058205	0.179278	0.316252	0.214313	-0.093113	0.627822	-0.319594	-0.056149	0.082351	-0.123598	0.048311	0.05015	0.015908	0.031557	0.227306	0.069786	-0.077419	0.05441	-0.16382	0.1591	-0.014591	0.227479	0.038834	-1.15546	0.300572		8	5
RP5-990P15	1	175196205	175273205	-0.42144	-0.348727	0.26552	-0.051659	0.344843	-0.03809	0.020426	0.107369	-0.004983	0.180999	0.523853	0.100027	0.140327	0.440266	-0.483314	-0.070697	-0.087346	-0.080762	0.153529	0.072656	0.078464	-0.240958	0.184405	-0.055649	-0.059496	-0.063449	-0.098085	0.154961	0.02523	0.1093	0.085316	-0.381666	0.184777		8	5
RP5-1098D14	1	175271208	175359131	-0.377673	-0.372057	0.190435	-0.157245	0.234907	0.015992	0.087024	0.18638	-0.023865	0.240289	0.357126	0.131215	-0.025128	0.516848	-0.309759	-0.162955	-0.042589	-0.037906	0.030297	0.137048	0.065037	-0.108153	0.137081	-0.0949064	-0.161225	0.000422	0.146834	0.213037	0.016892	-0.006639	0.034769	-0.955382	0.244594		8	5
RP11-428K3	1	175357133	175431803	-0.280847	-0.415313	0.295177	-0.140147	0.269277	-0.091495	0.023699	0.229783	-0.061575	0.128204	0.298877	0.141689	-0.048283	0.518432	-0.228782	-0.058689	-0.075498	-0.014356	0.007863	0.063578	0.0632	-0.087149	0.172628	0.028471	-0.202939	-0.029638	-0.049715	0.127225	0.031712	0.082819	0.074486	-0.514357	0.249732		8	5
RP4-595C2	1	175510952	175668526	-0.01186	-0.176002	0.412403	0.089441	0.356811	0.066436	0.29247	0.378421	-0.073728	0.167639	0.336236	0.275986	-0.023588	0.719984	-0.15681	-0.094807	0.159426	0.111479	0.033262	0.039333	0.045321	0.101859	0.291637	0.343113	-0.045894	0.095364	0.065775	0.154348	-0.04191	0.303038	0.165889	-0.79628	0.403846		8	5
RP11-177A2	1	175666527	175824392	-0.215215	-0.005059	0.162996	-0.233954	0.178739	0.035294	-0.012503	0.125957	-0.151026	0.141738	0.28041	0.040035	-0.008899	0.4612	-0.408994	-0.157778	-0.101095	-0.052278	-0.012831	0.076242	0.028715	-0.121954	0.176867	-0.061547	-0.218599	-0.055202	-0.011095	0.123246	0.000965	0.112611	0.092275	-0.596691	0.267967		8	5
RP11-550D19	1	175822393	175828386	-0.169595	0.186334	0.271157	-0.11102	0.299585	0.012317	0.085272	0.266446	-0.077638	0.148933	0.31515	0.029211	0.03619	0.644418	-0.429053	-0.083593	-0.042303	0.017557	0.002248	0.188265	0.09976	-0.068342	0.292017	0.013853	-0.111363	-0.012974	0.000909	0.186322	0.019522	0.110484	0.132508	-0.364567	0.276868		8	4
RP11-345I18	1	175826381	176013650	-0.140832	-0.057901	0.360263	-0.024671	0.229364	0.062392	0.198122	0.369109	0.051824	0.391116	0.45917	0.147437	0.086112	0.615692	-0.254073	-0.07777	0.106554	0.094099	0.084086	0.211303	0.130938	0.121637	0.318197	0.282338	-0.093813	0.065909	0.033432	0.292208	0.032734	0.264409	0.176127	0.169617	0.386259		8	4
RP4-632K5	1	176011651	176019509	-0.142838	-0.358532	0.300172	-0.109484	0.316492	-0.069301	0.157046	0.339869	0.01587	0.144389	0.38744	0.026288	0.081269	0.64038	-0.199401	-0.065241	0.0049	-0.004403	0.01578	0.195529	0.112253	0.041616	0.309532	0.0869493	-0.061113	0.012108	-0.032223	0.385485	0.020984	0.127302	0.17704	0.087434	0.445702		8	5
RP11-215I23	1	176017510	176171446	0.013592	-0.173972	0.262059	-0.123039	0.196398	0.063572	0.165238	0.268003	-0.005419	0.233747	0.545517	0.054921	0.123827	0.563623	-0.254733	-0.063245	0.008268	0.095397	0.150269	0.138376	0.116293	0.126174	0.313322	0.284999	-0.015751	0.03011	0.093745	0.324456	0.10144	0.275008	0.230428	0.44256	0.408264		8	5
RP11-545A16	1	176169447	176324862	-0.200776	-0.397962	0.201502	-0.24813	0.207257	0.036717	-0.055248	0.180093	-0.003598	0.002253	0.453026	0.08454	-0.11849	0.438795	-0.276519	-0.108717	-0.1236	-0.067253	-0.000336	0.111475	0.089136	-0.114578	0.222473	0.13443	-0.076743	-0.060524	-0.066545	0.227773	0.111836	0.110744	0.079195	0.221551	0.382512		7	5
RP11-12M5	1	176407487	176580517	-0.375499	-0.674853	0.052199	-0.325305	0.140287	0.0470621	-0.050719	0.066086	-0.0557	-0.000442889	0.287259	0.085733	-0.065205	0.306427	-0.580539	-0.155601	-0.1599	-0.142737	-0.05659	0.0537137	-0.006699	-0.100521	0.107359	-0.0823071	-0.275957	0.003991	0.144389	0.248247	0.047177	-0.025104	0.04163	0.079539	0.231795		6	5
RP11-46A10	1	177558688	177761291	-0.354118	-0.6013	0.095192	-0.241077	0.014045	0.036151	-0.077122	0.031929	-0.060038	0.10887	0.333215	-0.023828	-0.016037	0.330819	-0.539452	-0.150514	-0.224939	-0.055714	-0.044509	0.148504	-0.001079	-0.181217	0.142816	-0.109062	-0.220267	-0.070227	0.128493	0.274901	0.07011	-0.037496	0.012095	0.079993	0.19177		6	5
RP11-538D16	1	178751097	178825611	-0.368555	-0.612232	0.137059	-0.268836	-0.057446	0.036406	-0.075388	0.053398	-0.15422	0.09742	-0.254112	-0.109091	-0.141071	0.415266	-0.598685	-0.191302	-0.254729	-0.211338	-0.038596	0.093768	0.032995	-0.214737	0.167725	-0.153219	-0.186332	-0.131766	-0.057034	0.080513	-0.032338	0.04417	0.032585	0.068401	0.202974		5	5
RP11-71D4	1	179439704	179511167	-0.374539	-0.684553	0.131087	-0.220986	-0.031096	0.080643	-0.05196	0.196461	0.124745	-0.0318149	-0.443655	0.117017	-0.100876	0.313505	-0.537377	-0.179875	-0.131256	-0.150392	-0.026073	0.074135	-0.001144	-0.184247	0.053354	-0.20125	-0.24588	-0.087772	-0.064401	-0.031043	0.041163	0.059639	-0.076674	0.073742	0.16021		5	5
RP11-181K3	1	179794771	179958854	-0.075338	-0.170914	0.061415	-0.038803	-0.010259	-0.023617	0.128873	0.145443	-0.451827	0.094729	-0.220331	0.0262804	0.026019	0.418071	-0.233563	-0.030282	-0.02813	0.037899	0.024269	0.000764	-0.068442	0.015806	-0.01499	0.027584	-0.197496	-0.010204	0.044326	-0.012242	0.008545	0.129299	0.086807	-0.000862	0.0472619		5	5
RP11-293B7	1	180384081	180414420	-0.288164	-0.461276	0.131116	-0.207835	0.060527	0.027328	-0.112419	0.142918	-0.346984	-0.135935	0.219566	0.051248	0.046559	0.367279	-0.469719	-0.133446	-0.120596	0.001349	-0.001462	0.070264	0.067108	-0.126409	0.12994	-0.138745	-0.30603	-0.06574	-0.020832	0.053127	0.015601	0.028069	-0.0422	0.160453	0.303308		5	6
RP4-768P8	1	181299451	181341827	-0.173075	-0.478585	0.270073	0.04158	0.16344	-0.07446	0.048058	0.287655	-0.044798	-0.086097	0.150173	0.162571	-0.118344	0.571077	-0.384535	-0.053004	0.0082	-0.058954	0.028078	0.038109	-0.029196	-0.093387	0.213586	0.021584	-0.265302	0.056941	-0.023916	-0.010404	0.038756	0.174413	0.056208	-0.060381	0.213283		5	6
RP5-936P19	1	183414744	183515789	-0.060138	-0.329376	0.36918	0.124471	0.139592	0.046402	0.365008	0.513344	0.191556	-0.104552	0.154399	0.385955	-0.011911	0.668217	-0.313237	0.016527	0.344644	-0.053683	-0.009428	0.011643	-0.006329	0.173611	0.267419	0.084891	-0.150614	0.207144	-0.284485	0.002402	0.005923	0.255613	-0.003593	0.027038	0.332147		5	6
RP11-108M21	1	183908428	184079067	-0.099649	-0.331197	0.238088	-0.064782	0.098964	0.0217878	0.238658	0.303192	-0.07368	-0.213694	-0.33974	0.337261	-0.142576	0.634195	-0.380804	-0.12665	0.171584	0.080297	-0.007349	-0.004298	-0.061811	0.125451	0.160401	0.16012	-0.224184	0.138746	-0.087656	-0.03456	-0.023923	0.280864	-0.005401	0.091279	0.300469		5	6
RP11-336D15	1	185871259	185875252	-0.225554	-0.415712	-0.014662	0.000853	-0.251293	0.016948	0.115424	0.270759	-0.025124	-0.101112	0.232028	0.312073	-0.160779	0.09421	-0.434567	-0.191978	0.033446	-0.070641	-0.074714	0.015865	-0.037797	0.075289	0.298549	0.081167	-0.079768	0.074643	-0.146999	0.076647	-0.006329	0.15624	-0.065791	0.1327	0.240675		4	7
RP11-445K1	1	186717334	186907496	-0.138363	-0.327687	-0.004109	0.275827	-0.127024	0.02924	0.292856	0.302505	-0.126723	-0.056916	0.309946	0.251227	-0.134567	0.304728	-0.409229	-0.111033	0.152322	-0.101207	0.006241	0.109555	-0.041337	0.075049	0.300673	0.191242	-0.034252	0.099659	-0.000152286	0.023534	-0.028648	0.248816	0.092879	0.175437	0.277561		4	7
RP11-463J7	1	187357751	187523669	-0.198878	-0.461129	-0.074205	-0.200909	-0.21233	0.126559	0.167526	0.243271	-0.656461	-0.270125	0.321499	0.138275	-0.209836	0.106422	-0.446505	-0.123774	-0.027093	-0.207948	-0.017741	-0.00036	-0.040629	0.077223	0.241815	0.093262	-0.23687	0.087074	-0.070732	0.01996	-0.034804	0.174065	-0.051829	0.152933	0.311325		4	8
RP11-3B17	1	187439284	187591174	-0.220321	-0.577864	-0.017959	-0.094662	-0.231446	0.037435	0.057323	0.155195	-0.412603	-0.25475	0.335271	0.120438	-0.147854	0.155635	-0.510655	-0.116	0.068509	-0.340831	0.080466	0.001419	-0.09873	0.027219	0.262817	-0.079259	-0.207093	0.021724	-0.287556	-0.053658	0.008062	0.095484	-0.078217	-0.289141	0.161658		4	8
RP11-440G22	1	188607233	188784525	-0.194617	-0.559194	-0.015931	-0.160739	-0.247519	-0.021531	0.148779	0.237119	-0.536796	-0.220589	0.808357	0.160947	-0.18576	0.068224	-0.479092	-0.045963	0.002797	-0.278898	0.074503	0.093571	-0.009147	0.039061	0.231789	0.028518	-0.059213	0.068758	-0.078766	-0.026168	0.016496	0.151282	-0.068464	0.24661	0.305847		4	8
RP11-142L4	1	188797827	188976520	-0.117272	-0.545468	-0.056548	-0.208247	-0.245146	0.053723	0.038586	0.267655	-0.488189	-0.29776	0.796794	0.125035	-0.076556	0.105215	-0.519811	-0.062387	-0.059662	-0.25299	0.06801	0.04083	-0.006511	-0.019386	0.187452	0.006784	-0.027472	0.044441	-0.021829	0.008959	-0.008038	0.113565	-0.099678	0.170976	0.281063		4	8
RP11-239J11	1	189820406	189943269	-0.162888	-0.442395	0.136253	0.039412	-0.169248	-0.027171	0.175842	0.223445	-0.563402	-0.142429	-0.449122	0.106845	0.044903	0.259488	-0.316484	-0.048978	0.148052	-0.158931	0.054357	-0.004048	-0.064604	0.086502	0.263772	0.191799	-0.092757	0.1269	-0.054449	0.034197	-0.003314	0.074559	-0.02477	0.015654	0.129999		4	8
RP1-61P15	1	190796659	190889837	-0.182162	-0.403561	0.024388	-0.031256	-0.071857	-0.141255	-0.039759	0.295928	-0.447431	-0.067284	1.56177	0.225433	-0.039972	0.189526	-0.214175	-0.017685	0.139478	-0.139576	-0.011507	-0.057717	0.00919	0.06323	0.227863	0.067341	0.084791	0.104695	-0.303445	-0.036618	-0.015067	0.266021	0.042103	0.126546	0.302572		4	8
RP11-435N12	1	191662958	191842739	-0.066466	-0.345804	0.163686	-0.041819	-0.297598	0.002319	-0.189208	0.302964	-0.104859	-0.207324	1.56559	0.0841113	-0.126346	0.213436	-0.388772	-0.124639	0.099129	-0.048252	0.122842	-0.036474	-0.134467	0.015254	-0.076097	0.231613	-0.156543	0.117608	-0.23793	-0.033522	-0.060829	0.162122	-0.017839	0.005899	0.246589		3	8
RP11-552K17	1	192985204	193082884	-0.035432	-0.506476	0.147621	0.095072	-0.166415	0.049088	-0.0234	0.376062	0.019044	-0.164984	-0.409203	0.0609784	-0.107578	0.369332	-0.324413	-0.049649	0.176703	-0.186638	0.112791	0.006868	-0.125791	0.157126	-0.031298	0.107752	-0.21146	0.157774	0.011816	-0.058439	-0.00757	0.312643	0.0056	-0.112514	0.200091		3	8
RP11-75C23	1	194079274	194242502	-0.158087	-0.624227	0.006175	-0.015217	-0.26944	-0.046607	-0.16521	0.464354	0.156348	-0.252139	-0.110302	0.202686	-0.16523	0.106383	-0.547466	-0.120751	0.126142	-0.222023	-0.058295	-0.117431	-0.171792	0.052014	-0.167704	0.000945	-0.299232	0.13895	-0.121844	-0.103762	0.020615	0.056933	-0.057209	-0.076263	0.0738889		3	9
RP11-404H1	1	195068870	195217630	-0.206946	-0.653997	-0.127913	-0.079176	-0.242378	-0.136917	-0.24179	0.469482	0.032133	-0.292328	0.184544	0.138487	-0.210952	0.081947	-0.424513	-0.056273	0.096823	-0.322107	-0.020671	0.023712	-0.118566	0.003719	-0.178712	-0.0539956	-0.311417	0.072899	-0.253393	-0.093868	-0.003857	0.107294	-0.068368	-0.290774	0.220395		3	10
RP11-152M20	1	196240021	196378731	-0.050752	-0.354371	0.033784	0.117959	-0.103756	-0.030198	-0.149109	0.386471	-0.356805	-0.150873	0.650583	0.197781	-0.074828	0.164837	-0.22916	-0.061447	0.139691	-0.068562	0.001697	0.018494	-0.096548	0.051796	0.276034	0.062605	-0.186846	0.129019	0.1851	-0.03077	-0.00839	0.130564	0.04218	-0.034203	-0.079302		2	10
RP11-469A15	1	197013971	197179466	-0.167003	-0.37814	-0.144095	-0.000762	-0.25447	0.072901	-0.127169	0.270131	-0.128737	-0.114799	1.11144	0.076873	0.211355	0.290312	-0.52568	-0.089296	0.043412	0.025526	-0.032986	0.084728	0.027101	0.059748	-0.048012	0.150212	-0.293321	0.122885	0.136674	0.197539	0.017846	0.100749	0.129256	-0.037112	0.0150382		2	11
RP11-572A16	1	198883767	199061110	-0.450514	-0.711682	-0.300567	-0.210726	-0.296347	0.128824	-0.540721	0.064777	0.379458	-0.033937	-0.331263	-0.0689538	0.050234	-0.135036	-0.568864	-0.125474	-0.229779	-0.293432	0.037126	0.089573	-0.027421	-0.351831	-0.266043	-0.183897	-0.329568	-0.166096	-0.052401	0.073811	0.077104	-0.12615	-0.053104	-0.499231	-0.019226		2	12
RP11-480I12	1	199439616	199641469	-0.243496	-0.404907	-0.092056	-0.046511	-0.288035	0.10728	-0.152432	0.301952	0.283447	-0.0948358	-0.451645	-0.009092	0.188759	0.146732	-0.574806	-0.07882	-0.028067	-0.059739	-0.029841	0.025722	-0.015582	-0.042523	-0.03689	0.092508	-0.235115	0.076248	-0.034645	0.216663	0.067129	0.06357	0.065831	-0.02836	0.140335		2	13
RP11-739N20	1	201048828	201215906	-0.565598	-0.823504	-0.43758	-0.386704	-0.329644	0.010483	-0.556094	0.11873	0.52278	-0.03086	-0.423088	-0.188862	0.014649	-0.303335	-0.549064	-0.201044	-0.259291	-0.282054	-0.068277	-0.253115	0.04708	-0.328682	-0.393729	-0.37702	-0.308972	-0.22567	-0.037551	0.019633	0.055281	-0.181937	-0.149233	-0.0878825	-0.034218		1	14
RP11-563I16	1	201133610	201297517	-0.409695	-0.720496	-0.314967	-0.250018	-0.315283	0.014002	-0.478315	0.121148	0.364517	-0.024387	-0.50221	-0.101331	0.120702	-0.10358	-0.45911	-0.110491	-0.200375	-0.259221	-0.015401	-0.147338	-0.109804	-0.251606	-0.258021	-0.156889	-0.323199	-0.054969	-0.093461	0.09692	0.104419	-0.037439	-0.029725	-0.012147	0.000593		1	14
RP11-430C7	1	201213907	201347890	-0.449379	-0.763221	-0.364209	-0.244917	-0.289967	-0.002813	-0.449074	0.199248	0.452626	-0.059094	-0.411566	-0.050339	-0.101478	-0.236373	-0.370993	-0.162122	-0.165578	-0.319668	-0.10799	-0.17067	-0.04356	-0.277086	-0.349898	-0.201895	-0.34758	-0.100327	-0.0307151	-0.009299	0.040903	-0.12988	-0.108001	-0.120737	-0.02855		1	14
RP11-383G10	1	201807724	201988595	-0.31836	-0.625603	-0.201842	-0.132741	-0.236579	0.02977	-0.398709	-0.316512	0.369904	-0.15368	-0.385426	0.025379	0.119058	0.010816	-0.441564	-0.092771	-0.120402	-0.171993	0.019784	-0.112018	-0.057927	-0.131923	-0.18317	-0.240282	-0.327525	-0.009088	-0.055192	0.077724	0.034639	-0.114976	0.14058	-0.017743	-0.039178		1	14
RP11-534L20	1	203028091	203135779	-0.498512	-0.871718	-0.437587	-0.241019	-0.397307	0.135273	-0.448306	-0.962804	0.196708	-0.049787	-0.47872	-0.150569	0.244111	-0.297187	-0.561187	-0.219207	-0.228628	-0.54582	-0.078998	-0.116949	0.043071	-0.296045	-0.310611	-0.34824	-0.375852	-0.147034	-0.043209	-0.023951	0.083399	-0.227459	0.002678	-0.093082	-0.362551		1	16
RP11-564A8	1	203409712	203602276	-0.451672	-0.684732	-0.291753	-0.109679	-0.297177	0.000657	-0.407144	-0.829348	0.107613	-0.130514	-0.474533	-0.096273	-0.047168	-0.045677	-0.477598	-0.167731	-0.129456	-0.358022	-0.049135	-0.337366	0.035594	-0.253963	-0.268013	-0.14984	-0.356972	-0.112137	-0.180351	-0.049949	0.074554	-0.069533	0.11436	-0.302908	-0.858289		0	16
RP11-59A2	1	204934380	205111126	-0.34541	-0.704524	-0.279825	-0.16568	-0.283463	-0.001986	-0.359646	-0.783959	0.052861	-0.279936	-0.311739	-0.056933	-0.241002	-0.014123	-0.280101	-0.093304	-0.042292	-0.395371	-0.034304	-0.180233	-0.189804	-0.210194	-0.3022	-0.106977	-0.359032	-0.068277	-0.0922	-0.174428	0.047738	-0.06344	0.171469	-0.11337	-0.690043		0	17
RP11-385M4	1	205660422	205834338	-0.336994	-0.495009	-0.164617	-0.024162	-0.133943	0.114934	-0.103197	-0.677397	0.051747	-0.117346	-0.434063	0.075416	-0.12954	0.112985	-0.382257	-0.142048	0.072973	-0.245897	-0.133231	-0.279259	-0.186344	-0.094717	-0.249792	0.020177	-0.313168	0.063074	-0.244693	-0.089631	0.07238	0.074735	0.123197	-0.101909	-0.561507		0	17
RP5-879K22	1	206911140	207048817	-0.395193	-0.580791	-0.323104	-0.249095	-0.216818	-0.152399	-0.44533	-0.829895	-0.578416	-0.33116	-0.384757	-0.080731	-0.172633	-0.142884	-0.384014	-0.120608	-0.198992	-0.328265	-0.116919	-0.241716	-0.163078	-0.314922	-0.318841	-0.175077	-0.345124	-0.119888	-0.043213	-0.080755	0.029205	-0.146806	0.050596	-1.17153	-0.581883		0	17
RP11-354K1	1	208088895	208303120	-0.245251	-0.540665	-0.209115	-0.040475	-0.198617	-0.006564	-0.269139	-0.739525	0.273641	-0.093923	-0.379681	0.086117	-0.021034	0.004254	-0.32836	-0.132366	-0.143147	-0.111209	-0.064754	-0.275543	-0.082368	-0.19461	-0.243177	-0.043017	-0.299587	-0.088216	-0.0786387	0.033191	-0.037972	-0.000967	0.032915	-1.33191	-0.654018		0	17
RP11-286E7	1	209626325	209803014	-0.174136	-0.513611	-0.123145	-0.119717	-0.055279	-0.174624	-0.234794	-0.533558	0.364291	-0.270098	-0.256549	0.043101	-0.337396	0.113564	-0.18447	-0.0113	0.028692	-0.350505	-0.01623	-0.21693	-0.220228	-0.073063	-0.260197	0.017036	-0.304838	0.054619	-0.058287	-0.062967	-0.007706	0.138378	0.051573	0.025112	-0.501526		1	17
RP11-434B7	1	209801015	209923222	-0.224627	-0.376804	-0.183219	-0.035916	-0.201706	0.01464	-0.116871	-0.655042	0.314678	-0.194838	-0.469657	-0.016318	-0.204161	0.150833	-0.453252	-0.074584	0.036306	-0.191433	-0.104381	-0.260032	-0.254945	-0.083055	-0.229802	0.026779	-0.34438	0.093345	-0.249772	-0.074683	0.010946	0.045365	0.025251	-0.129802	-0.523999		1	17
RP11-323K10	1	211461945	211553226	-0.319904	-0.600371	-0.268886	-0.120662	-0.297809	-0.059186	-0.205109	-0.60541	-0.474755	-0.213772	-0.51764	0.04717	-0.345255	0.059955	-0.423738	-0.161125	-0.034307	-0.381792	-0.059058	-0.258488	-0.172694	-0.114765	-0.238918	-0.021228	-0.318677	-0.014059	-0.286809	-0.130489	-0.063598	0.098349	-0.109095	-0.071214	-0.897341		0	18	2.33324	1q
RP11-438G15	1	212007839	212080384	-0.248202	-0.657423	-0.254364	-0.123921	-0.291804	-0.129382	-0.322571	-0.750164	-0.469847	-0.335327	-0.454926	-0.001505	-0.363134	0.021527	-0.378688	-0.101213	-0.033004	-0.531385	-0.082019	-0.186353	-0.187754	-0.116331	-0.311915	-0.052158	-0.367846	0.002513	-0.184183	-0.198473	0.028825	0.030018	-0.05432	-1.28691	-0.648818		0	18
RP11-66M7	1	213531713	213695638	-0.283611	-0.485276	-0.182422	0.008704	-0.309532	0.120523	-0.154715	-0.702053	-0.504976	-0.159488	-0.492612	0.027738	-0.33652	0.080775	-0.43005	-0.06784	0.05241	-0.247111	-0.128313	-0.256233	-0.202486	-0.121387	-0.2445	-0.038479	-0.317709	0.043353	-0.274174	-0.094348	0.0146	0.01572	-0.10675	-0.138044	-0.643917		0	18
RP11-241C9	1	213693639	213795180	-0.262058	-0.446349	-0.168478	0.024228	-0.336504	-0.007374	-0.180405	-0.679725	-0.554579	-0.216469	-0.495753	0.09018	-0.215354	0.184202	-0.504694	-0.0848248	0.070042	-0.22852	-0.093857	-0.285899	-0.14155	-0.050004	-0.149696	0.083103	-0.255485	0.063091	-0.100127	-0.066111	-0.085663	0.071875	-0.022823	-0.21001	-0.452391		0	18
RP11-224O19	1	214854372	215040155	-0.197773	-0.533731	-0.328357	-0.180723	-0.385364	0.00691	-0.216354	-0.711979	-0.653757	-0.187661	-0.356147	0.062098	-0.25149	0.037704	-0.592997	-0.112769	-0.082092	-0.304462	-0.096054	-0.161712	-0.103765	-0.0526	-0.187095	-0.038786	-0.312017	-0.001848	0.057033	0.050516	0.007774	0.047039	0.119771	0.026144	-0.777809		0	17
RP11-392O17	1	215800630	215979677	-0.18546	-0.36859	-0.137224	-0.041894	-0.275642	0.001431	-0.167197	-0.512255	-0.399448	-0.161752	-0.322878	0.102252	-0.350583	0.209165	-0.266578	-0.053606	0.154374	-0.285125	-0.05049	-0.212555	-0.200242	0.030025	-0.13744	0.120369	-0.258688	0.111907	-0.04643	-0.053824	-0.046503	0.0992	0.03693	-0.13758	-0.611078		0	17
RP11-492K2	1	215864587	216065023	-0.240892	-0.468724	-0.207789	0.012777	-0.223701	-0.006765	-0.136241	-0.627751	-0.634352	-0.178598	-0.474205	0.104927	-0.248627	0.100852	-0.460188	-0.053906	0.050494	-0.294576	-0.12117	-0.250367	-0.190703	-0.06421	-0.122558	-0.054114	-0.29801	0.025822	-0.108572	-0.106877	-0.040886	-0.029423	-0.047826	-0.033672	-0.452391		0	17
RP11-332J14	1	217020453	217187798	-0.276087	-0.614853	-0.273303	-0.078625	-0.284138	-0.120724	-0.214605	-0.6706	-0.559179	-0.262762	-0.446152	0.108229	-0.361675	0.056106	-0.475234	-0.076841	0.01012	-0.400728	-0.080427	-0.244709	-0.160306	-0.120911	-0.272819	-0.075383	-0.285351	-0.002568	-0.07209	-0.08294	-0.017494	0.046406	-0.070306	-0.081343	-0.125929		0	17
RP11-308L13	1	218216085	218241326	-0.255494	-0.477303	-0.215483	0.007896	-0.249694	-0.054833	-0.211524	-0.670764	-0.613791	-0.1924	-0.34012	0.12061	-0.17932	0.068034	-0.334698	-0.072765	-0.020061	-0.260777	-0.071073	-0.203906	-0.122726	-0.099076	-0.202131	-0.089219	-0.269063	-0.155262	-0.10749	0.025277	0.046568	0.038808	7.8e-05	-0.063068	-0.093359		0	17
RP11-239E10	1	219658089	219839554	-0.440353	-0.774228	-0.418014	-0.206921	-0.310456	-0.063407	-0.484186	-0.956689	-0.608833	-0.222546	-0.459801	-0.155893	-0.173868	-0.245753	-0.554326	-0.105397	-0.232077	-0.336146	-0.129655	-0.144485	-0.149862	-0.334129	-0.350702	-0.286622	-0.4067	-0.193971	-0.072674	-0.090221	0.016725	-0.119882	-0.088762	-0.026078	-0.135691		0	17
RP11-105I12	1	220130542	220311794	-0.339534	-0.528856	-0.254189	-0.104403	-0.27401	-0.05352	-0.368646	-0.805637	-0.700648	-0.156968	-0.422978	-0.010788	-0.118589	-0.037748	-0.390475	-0.086927	-0.116821	-0.207957	-0.119961	-0.09747	-0.092048	-0.163059	-0.216232	-0.082606	-0.286489	-0.037309	-0.034827	0.064857	0.041554	-0.077177	0.006793	-0.087193	-0.017304		0	16
RP11-100E13	1	221002859	221166604	-0.38435	-0.60519	-0.271566	-0.030212	-0.121934	-0.030021	-0.241148	-0.80437	-0.021529	-0.054659	-0.454766	0.070977	-0.111262	-0.020491	-0.498476	-0.08967	-0.097381	-0.248805	-0.131263	-0.193781	-0.133142	-0.263181	-0.302606	-0.066493	-0.402989	-0.033357	-0.188499	0.062715	0.049091	-0.041263	0.045936	-0.027921	-0.569153		0	15
RP4-555J6	1	221711686	221833513	-0.281435	0.713415	0.341648	0.230709	0.371544	0.447715	0.295694	0.253845	-0.228093	0.605444	0.432793	0.136805	0.600788	0.461508	0.095177	-0.175871	0.356761	0.342336	1.28698	0.141616	0.228328	0.07526	0.513974	0.092918	-0.126794	0.151025	-0.163197	0.290348	-0.064134	0.136641	0.297706	0.370862	-0.145026		0	15
RP11-375H24	1	223371346	223434251	-0.477573	-0.680785	-0.404321	-0.233522	-0.348829	-0.056424	-0.503022	-0.820131	0.254815	-0.131871	-0.427057	0.025291	-0.158836	-0.273217	-0.352159	-0.171607	-0.14465	-0.432958	-0.104287	-0.183283	-0.124445	-0.280355	-0.309631	-0.319097	-0.347477	-0.084164	0.010561	-0.028332	0.065991	-0.090486	-0.142412	-0.030706	-0.046522		0	15
RP11-276J4	1	223890023	224047840	-0.276728	-0.360041	-0.273571	-0.0833	-0.187234	-0.0122426	-0.1765	-0.701656	-0.518178	-0.13074	-0.400218	0.008911	-0.244945	0.012527	-0.392615	-0.031365	-0.095687	-0.147969	-0.054412	-0.198526	-0.092261	-0.232119	-0.222552	-0.024358	-0.303682	-0.047478	-0.294015	-0.047381	-0.003857	5.4e-05	-0.014044	0.116907	-0.425943		0	15
RP4-799G3	1	225195410	225323048	-0.413382	-0.371154	-0.327788	-0.116248	-0.289849	-0.054633	-0.214282	-0.779761	-0.033384	0.010329	-0.413327	0.075687	-0.06641	-0.035441	-0.286248	-0.177304	-0.016531	-0.207237	-0.125788	-0.183241	-0.114185	-0.172464	-0.25426	-0.030798	-0.199482	0.026757	0.146069	0.081236	0.035657	-0.012046	-0.008306	0.069385	-0.422696		0	15
RP4-679K16	1	225905399	225930467	-0.092092	-0.346062	-0.242436	-0.090604	-0.21741	-0.016254	-0.138382	-0.608846	-0.032167	-0.070098	-0.327556	0.088858	-0.054492	0.062812	-0.43974	-0.087247	0.056138	-0.127148	-0.135221	-0.140463	-0.114458	-0.035512	-0.07584	-0.023721	-0.099155	0.098144	-0.012703	0.091706	0.008247	0.17502	0.040653	0.051709	-0.286454		0	15
RP11-99J16	1	227197843	227397006	-0.489821	-0.812681	-0.429282	-0.214637	-0.143598	-0.429143	-0.400794	-0.892706	0.098365	-0.228726	-0.438747	-0.035937	-0.271121	-0.224948	-0.544748	-0.152258	-0.145456	-0.429573	-0.174986	-0.164993	-0.111334	-0.344358	-0.3301	-0.295334	-0.199125	-0.113106	-0.029794	0.082995	-0.004277	-0.116134	-0.137814	-0.057728	-0.412843		0	17
RP11-87P4	1	228978880	229162150	-0.47397	-0.838813	-0.443723	-0.259156	-0.031476	-0.491647	-0.428695	-0.873345	-0.080305	-0.249129	-0.461627	0.093032	-0.163365	-0.130206	-0.440711	-0.10644	-0.201933	-0.431672	-0.151557	-0.133823	-0.027419	-0.284491	-0.331628	-0.158224	-0.195457	-0.08885	-0.047679	-0.025972	-0.003332	-0.176319	-0.131927	-0.070881	-0.411994		0	17
RP11-528D17	1	229940876	230054295	-0.288722	-0.483508	-0.300117	-0.104154	-0.31757	0.082564	-0.175946	-0.740987	-0.582464	-0.232134	-0.379049	0.121356	0.107195	0.031846	-0.478884	-0.131104	-0.015445	-0.214812	-0.089251	-0.159827	-0.017042	-0.113126	-0.217024	-0.049013	-0.29341	0.069854	0.073212	0.104763	0.018495	-0.016913	-0.019112	0.02319	-0.425943		0	17
RP11-509I1	1	232131194	232211294	-0.070144	-0.570629	-0.290502	-0.142101	-0.00316	-0.451692	0.066123	-0.676496	0.009902	-0.282867	-0.401147	0.166512	-0.330301	-0.022687	-0.556208	-0.111978	0.014575	-0.340418	0.122594	-0.164631	-0.101064	0.125891	-0.225069	-0.109512	-0.06748	0.013517	-0.058978	0.23746	0.021828	0.081932	-0.051321	0.150698	-0.314709		0	15
RP5-940F7	1	232415075	232518682	-0.242725	-0.451809	-0.26638	-0.128635	0.159867	-0.359121	0.021723	-0.755262	-0.183939	-0.203341	-0.376342	0.00761	-0.007176	0.089489	-0.509248	-0.096776	-0.115144	-0.117732	-0.09937	-0.096202	0.010806	0.060534	-0.194285	0.009014	-0.080172	-0.056243	-0.084824	0.270353	0.03744	-0.005947	0.112071	-0.07398	-0.360334		0	15
RP11-214M7	1	233801618	233985166	-0.161237	-0.567631	-0.324652	-0.103368	0.067742	-0.3913	0.085576	-0.610212	0.021031	-0.692248	-0.427887	0.162222	-0.301253	0.102468	-0.580422	-0.080717	0.010284	-0.241447	-0.162776	-0.119203	-0.009736	-0.188708	-0.125265	-0.118943	0.012969	0.003377	-0.093777	0.141525	-0.0003334	0.027815	-0.074559	-0.102117	-0.353637		0	15
RP11-433N10	1	234827780	235014768	-0.152957	0.004288	-0.207276	-0.073542	-0.050274	-0.366423	0.205923	-0.618681	-0.100344	-0.379845	-0.285792	0.125876	-0.206435	0.095129	-0.493597	-0.087699	0.024725	-0.135457	-0.091595	-0.157512	-0.035785	0.17042	-0.075555	0.113594	-0.330823	0.071392	-0.028879	0.032778	-0.037095	0.161557	0.046541	0.070922	-0.225136		0	15
RP11-359A17	1	235850820	236040328	-0.244639	-0.609009	-0.36814	-0.182117	-0.102187	-0.400554	0.07683	-0.720393	-0.179723	-0.613855	-0.327063	0.080164	-0.331916	0.044215	-0.675876	-0.127463	-0.120201	-0.35358	-0.164333	-0.152833	0.004826	0.006942	-0.242359	-0.093468	-0.428937	-0.034229	-0.071603	0.031032	-0.020914	0.043163	-0.060678	0.018064	-0.415066		0	15
RP11-80B9	1	237216930	237390563	-0.100637	-0.180675	-0.16186	-0.009606	0.008466	-0.285052	0.119321	-0.58477	-0.657493	-0.467952	-0.214714	0.080787	-0.110929	0.219078	-0.487209	-0.06292	-0.002302	-0.115695	-0.078736	-0.110506	-0.072341	0.391286	-0.005952	0.140405	-0.29686	0.11601	-0.012012	0.19094	0.055514	0.191271	0.074725	-1.00942	-0.339898		0	14
RP11-553N16	1	238261761	238405727	-0.251145	-0.270244	-0.281626	-0.06847	-0.024558	-0.392248	0.181363	-0.691532	-0.067912	-0.53094	-0.393735	0.10001	0.019738	0.092447	-0.420506	-0.152635	0.075107	-0.028829	-0.17993	-0.218468	0.016596	-0.175003	-0.13702	0.054516	-0.366507	0.102098	-0.036392	0.153252	-0.032865	0.120394	-0.01648	0.05474	-0.359549		0	14
RP11-411G13	1	239599386	239754740	-0.001633	0.361998	-0.110432	0.034696	-0.083115	-0.271038	0.195725	-0.098547	-0.198264	-0.566236	-0.328965	0.231936	-0.02302	0.193904	-0.191681	-0.068731	0.212359	-0.063343	0.145542	-0.231278	0.020817	0.0038	0.040523	0.367798	-0.529058	0.118222	-0.150011	0.144781	-0.180077	0.22381	-0.03405	-0.164202	-0.227778		0	14
RP11-13L16	1	240750935	240907231	-0.308282	0.36029	-0.349758	-0.24831	0.028857	-0.411819	-0.089619	-0.637544	-0.197623	-0.61115	-0.33339	0.059386	0.12109	-0.06375	-0.52039	-0.166634	-0.213718	-0.296909	-0.157615	-0.063055	0.043066	-0.191553	-0.252163	-0.145876	-0.311521	-0.13586	-0.04776	0.069474	0.048737	-0.095591	-0.010708	-0.03607	-0.314012		1	15
RP11-399B15	1	241481713	241690809	-0.388531	1.07522	-0.417958	-0.303024	-0.028758	-0.390164	-0.055336	-0.606795	-0.117555	-0.55889	-0.375023	0.087581	-0.116813	-0.078209	-0.54154	-0.226715	-0.165367	-0.198767	-0.169336	-0.144361	0.00766	-0.392558	-0.325563	-0.129864	-0.356555	-0.075731	0.015778	0.214421	0.030957	-0.069822	-0.018927	0.031386	-0.318667		2	15
RP11-551G24	1	243471733	243539815	-0.205146	1.22135	-0.301204	-0.136687	-0.055379	-0.271678	0.047853	-0.672557	-0.223975	-0.43773	-0.276757	-0.096809	0.065672	0.090769	-0.446126	-0.143327	-0.073214	-0.171753	-0.070786	-0.27233	0.015455	0.086724	-0.037777	-0.002861	-0.189904	-0.015441	-0.022236	0.094082	-0.047316	0.102517	0.040288	0.615347	-0.296086		2	15
RP11-438H8	1	244273235	244440465	-0.245191	0.7386	-0.500988	-0.332195	-0.109094	-0.347615	-0.22663	-0.77535	-0.432116	-0.758569	-0.326247	0.001886	-0.273352	-0.1569	-0.635069	-0.177555	-0.25423	-0.481152	-0.077878	-0.136219	-0.039306	-0.404731	-0.181391	-0.315887	-0.385007	-0.06362	-0.121907	-0.226361	0.130572	-0.156979	-0.127093	0.528851	-0.351372		2	15
CTB-160H23	1	245272863	245407169	-0.394414	0.696713	-0.183062	-0.09954	0.025151	0.112055	-0.06063	0.23022	0.030076	-0.357566	-0.376531	0.050104	0.125931	-0.095296	-0.099597	-0.109407	-0.182428	-0.356139	-0.026977	-0.161012	0.068154	-0.373433	-0.085231	-0.0186907	-1.22215	-0.072231	-0.134756	-0.172923	0.038642	0.010399	0.063369	0.642546	-0.262126		3	10
GS1-68F18	2	224263	405255	-0.438624	-0.537171	-0.489744	-0.240952	-0.339991	-0.723113	-0.371582	-0.381221	-0.010507	-0.453926	-0.370406	-0.231585	-0.105575	-0.532175	-0.08573	-0.099943	-0.192977	-0.389317	-0.48406	-0.273591	-0.078639	0.323274	-0.223237	-0.244532	-1.27893	-0.018074	-0.164754	-0.318909	0.033045	-0.146892	-0.196935	-0.176391	-0.143459		1	15
GS1-8L3	2	330000	430000	-0.408522	-0.759516	0.006542	-0.086084	-0.56385	0.163419	-0.196535	-0.761809	-0.046112	-0.445888	-0.32399	-0.23393	0.290065	-0.155738	-0.340651	-0.035623	-0.247286	-0.175716	-0.223307	0.068824	-0.223895	-0.409896	-0.011551	-0.058647	0.170368	0.037741	0.15442	-0.187776	0.142931	-0.296351	-0.133434	0.243772	-0.626975		2	11
RP11-168K7	2	1604133	1776577	-0.232636	-0.550375	-0.014306	0.072378	-0.258886	-0.21314	-0.141524	-0.038102	0.082845	-0.026672	-0.089593	0.107103	-0.023901	-0.00608389	0.0416921	-0.008709	0.047687	-0.206018	-0.021447	-0.062001	-0.145085	0.076521	-0.146496	0.0922	-0.517274	0.040706	-0.071604	-0.052238	0.172183	-0.0294949	-0.156802	-0.081238	0.04303		0	13
RP11-352J11	2	2201507	2381298	-0.384	-0.459946	-0.325212	-0.085964	-0.207203	-0.713566	-0.227953	-0.193421	0.116002	-0.040309	-0.037054	0.017675	-0.296823	-0.361551	0.147463	-0.021697	0.052411	-0.326453	-0.525536	-0.210091	-0.120452	-0.159313	-0.270439	-0.118671	-1.28766	0.065339	-0.122652	-0.055121	0.143931	-0.341623	-0.175221	-0.298249	-0.201886		0	16	6.0498	2p
RP11-327H5	2	3437074	3642424	-0.471621	-0.772966	-0.374115	-0.161232	-0.260284	-0.274765	-0.325475	-0.382339	0.075485	-0.836033	-0.092717	-0.192059	-0.173053	-0.432328	-0.102289	-0.051279	-0.042151	-0.405742	-0.48266	-0.23205	-0.082516	-0.229972	-0.383465	-0.254227	-0.375118	-0.020349	-0.008901	0.022876	0.275295	-0.523896	-0.037021	-0.427242	-0.128735		0	16
RP11-292A20	2	4295218	4453491	-0.378208	-0.659678	-0.275328	0.068766	-0.208368	-0.346584	-0.120123	-0.194574	0.07765	-0.702075	-0.053409	-0.099616	-0.243745	-0.29908	0.097181	-0.00388	0.054196	-0.349383	-0.566492	-0.276358	-0.140896	-0.126198	-0.269021	-0.055647	-0.255903	0.111965	-0.249782	0.117699	0.211675	-0.354815	-0.203439	-0.493769	-0.059498		0	16
RP11-350H23	2	5797393	5989326	-0.420445	-0.761525	-0.331461	-0.082072	-0.291557	-0.300872	-0.286294	-0.318361	0.07616	-0.796554	-0.11767	-0.164753	-0.297291	-0.355584	-0.040868	-0.048168	0.030756	-0.481249	-0.55831	-0.270482	-0.155243	-0.244292	-0.335577	-0.192607	-0.377753	-0.026175	-0.156031	-0.12486	0.289305	-0.36749	0.138626	-0.588095	-0.160473		0	16
RP11-485O17	2	6681415	6773641	-0.318665	-0.54311	-0.275578	-0.056437	-0.331804	-0.296275	-0.173108	-0.298563	-0.07377	-0.710027	0.065094	-0.123614	-0.206579	-0.193016	-0.104056	0.015962	0.069327	-0.531408	-0.446087	-0.197263	-0.125066	-0.123434	-0.257492	-0.063827	-0.335574	0.095165	-0.242447	-0.070237	0.288122	-0.37337	-0.079642	-0.570058	-0.217775		0	16
RP11-496C3	2	7481746	7660122	-0.309296	-0.516005	-0.261853	-0.103781	-0.257997	-0.31062	-0.198558	-0.261376	-0.049926	-0.68936	0.013147	-0.124938	-0.125274	-0.305106	0.06562	-0.036885	0.023747	-0.232048	-0.104324	-0.166462	-0.06929	-0.129373	-0.248897	-0.085414	-0.298696	0.006176	-0.039028	-0.084283	0.05433	-0.328693	-0.051206	-0.319115	-0.144187		0	16
RP11-16D24	2	7742709	7863200	-0.302571	-0.420101	-0.300736	-0.052483	-0.222685	-0.0658433	-0.129405	-0.034023	-0.012179	-0.378621	0.007268	-0.093997	-0.039588	-0.080295	0.008021	-0.002289	0.07312	-0.101566	0.053998	-0.227798	-0.091572	-0.080526	-0.171175	0.000697	-0.100636	0.038182	-0.048394	-0.070326	0.028516	-0.338898	0.063247	0.0115846	-0.244671		0	16
RP11-542B5	2	8065119	8251305	-0.443064	-0.411905	-0.231617	0.076924	-0.204689	-0.323758	-0.223567	-0.219359	-0.054376	-0.718065	-0.009303	-0.144333	0.127009	-0.288016	0.096699	0.037505	0.030173	-0.078978	-0.120801	-0.241672	0.043142	-0.178658	-0.193608	-0.11644	-0.222569	0.036983	-0.131045	0.034405	0.36516	-0.373549	-0.094189	-0.145126	-0.091357		0	16
RP11-434B12	2	8639084	8816516	-0.364632	-0.470998	-0.254396	-0.0495328	-0.135144	-0.071477	-0.116839	-0.254678	-0.010388	-0.621942	-0.054942	-0.0937584	0.213278	-0.21007	0.096042	0.020783	0.076891	-0.178508	0.077592	-0.248577	-0.065872	-0.141616	-0.28421	-0.021399	-0.32628	0.075171	-0.077877	-0.072549	0.414603	-0.317879	0.003705	-0.52337	-0.100103		0	15
RP11-214N9	2	9621423	9720257	-0.364092	-0.398789	-0.186505	0.139847	-0.169102	-0.353002	-0.182521	-0.220961	0.020521	-0.665328	0.080261	-0.191946	0.027921	-0.34829	0.098778	0.010333	0.019724	-0.077951	-0.01177	-0.2162	-0.064831	-0.153317	-0.202349	-0.0952898	-0.215824	0.006222	-0.066809	0.126255	0.104937	-0.368777	0.105958	-0.145126	-0.108811		0	15
RP11-83M8	2	10223093	10426342	-0.501427	-0.658808	-0.402856	-0.22903	-0.279482	-0.237755	-0.418001	-0.477319	-0.049502	-0.639003	0.079041	-0.316661	0.131292	-0.518023	-0.0029555	-0.079562	-0.205398	-0.294506	-0.068912	-0.169096	-0.017679	-0.242773	-0.344188	-0.28177	-0.28584	-0.197881	0.0123344	0.044614	0.085567	-0.485834	-0.139821	-0.196651	-0.056266		0	15
RP11-345J13	2	11155220	11327985	-0.328655	-0.453087	-0.224352	0.011133	-0.264125	-0.480968	-0.129354	-0.450164	0.023027	-0.618807	0.015027	-0.14219	0.059316	-0.309326	-0.066655	-0.028379	0.060125	-0.265028	0.083929	-0.192026	-0.116103	-0.163264	-0.211318	-0.069717	-0.305042	0.066873	0.114142	0.117408	0.092251	-0.35151	-0.058278	-0.400805	-0.125574		0	15
RP11-333O1	2	12733637	12937354	-0.499457	-0.560561	-0.27362	-0.036357	-0.242671	-0.868849	-0.21507	-0.270144	-0.069338	-0.80047	-0.086226	-0.144848	-0.077403	-0.331357	0.014375	0.04112	0.029336	-0.162862	-0.141196	-0.199052	-0.073014	-0.199894	-0.305701	-0.109131	-0.34361	0.044813	-0.0808677	-0.043272	-0.026399	-0.343293	-0.209963	-0.535863	-0.037249		0	15
RP11-132H1	2	13534171	13669992	-0.206362	-0.324969	-0.119747	0.061357	-0.141037	-0.342594	-0.004105	0.000451	0.043683	-0.489727	0.044382	0.027899	-0.051368	0.044278	0.249981	0.066774	0.163881	-0.251523	0.115208	-0.156885	-0.097597	0.075236	-0.095156	0.061092	-0.127522	0.131531	-0.207519	-0.00462	-0.03945	-0.081418	-0.07225	-0.149684	0.036802		0	15
RP11-163G14	2	14556520	14726327	-0.32968	-0.322482	-0.172927	-0.017225	-0.14995	-0.253617	-0.124358	-0.131073	0.020025	-0.606471	-0.006186	-0.0980364	-0.127835	-0.210407	0.116112	0.061151	0.083834	-0.047689	-0.094517	-0.240248	-0.123678	-0.118015	-0.260048	-0.0857008	-0.163542	0.122024	-0.102969	-0.044961	-0.032428	-0.308347	-0.191566	-0.250506	-0.0985989		0	15
RP11-136K18	2	14777585	14924713	-0.286932	-0.290768	-0.183495	-0.0537	0.011301	-0.023178	0.009973	0.216485	-0.161878	-0.260969	-0.169166	-0.040541	-0.220211	0.053335	0.15471	-0.024153	0.07894	-0.111333	0.191724	-0.210068	6e-05	-0.182666	-0.083347	0.146628	-0.249009	0.014548	-0.169102	-0.033042	-0.072832	-0.053348	-0.128452	-0.220013	0.037098		0	14
RP11-247H16	2	15152787	15242057	-0.42807	-0.443761	-0.341781	-0.091036	-0.373728	0.051381	-0.219187	-0.236093	0.166216	-0.789566	-0.012765	-0.03435	-0.135363	-0.385635	0.014369	-0.055731	0.129081	-0.244324	-0.144407	-0.240841	-0.095008	-0.096874	-0.2956	-0.119973	-0.280131	0.058038	0.042413	-0.050062	-0.062966	-0.447878	-0.249335	-0.516592	-0.082928		0	14
RP11-355H10	2	15965376	16164335	-0.35627	-0.646637	-0.347757	-0.199463	-0.328805	0.045536	-0.371475	-0.504483	-0.084999	-0.902203	0.117651	-0.108074	-0.144021	0.060644	-0.099183	-0.012012	-0.119242	-0.347655	-0.046343	-0.211264	-0.114279	-0.291549	-0.293187	-0.269543	-0.337952	-0.060597	-0.030249	0.030563	-0.041134	-0.483465	-0.18718	-0.624063	-0.120015		0	14
RP11-549D18	2	16304097	16493990	-0.455303	-0.562469	-0.41898	-0.200048	-0.219623	-0.009113	-0.275088	-0.364836	-0.01598	-0.70726	0.020958	-0.195667	-0.232007	-0.146334	-0.021706	-0.08316	-0.127383	-0.255903	-0.130437	-0.143107	-0.014861	-0.284326	-0.303423	-0.257212	-0.255515	-0.10107	-0.080181	-0.011536	-0.033769	-0.4248	-0.261823	-0.424089	-0.154573		0	14
RP11-502F14	2	16442178	16442976	-0.505495	-0.648912	-0.40662	-0.249775	-0.340346	0.079468	-0.278334	-0.471416	-0.107212	-0.848189	0.127027	-0.287691	-0.250209	-0.250386	-0.121901	-0.008688	-0.183827	-0.234574	-0.131766	-0.094635	-0.012331	-0.23163	-0.292615	-0.232656	-0.246658	-0.071541	0.103097	0.046316	0.004386	-0.482942	-0.240668	-0.278266	-0.14812		0	14
RP11-262D22	2	17179449	17190666	-0.40281	-0.596947	-0.345523	-0.116456	-0.242503	-0.039374	-0.1752	-0.21628	-0.007937	-0.84105	0.065089	-0.158123	-0.162113	-0.364902	-0.016943	-0.052854	-0.008624	-0.221018	-0.132404	-0.18911	-0.115037	-0.117971	-0.1669	-0.232349	-0.21066	0.016983	-0.0574264	-0.00445	0.0991583	-0.397115	-0.103624	-0.397666	-0.172171		0	14
RP11-111J6	2	18548232	18724921	0.087961	-0.070246	-0.196446	-0.23749	-0.112809	0.02371	-0.108597	-0.187057	-0.076702	-0.219701	0.242273	-0.002953	-0.156777	0.064206	-0.122926	0.025664	-0.064058	-0.04242	0.584158	-0.068612	-0.008381	-0.038135	-0.237086	-0.329623	-0.201944	0.057332	0.04446	0.006068	0.035445	-0.207306	-0.044656	-0.44295	-0.253538		0	13
RP11-458J18	2	19386598	19569888	-0.36532	-0.500822	-0.221062	-0.201426	-0.27018	-0.31622	-0.171716	-0.222308	-0.036943	-0.346546	0.006524	-0.030718	-0.113177	0.080652	-0.003232	-0.013093	-0.002651	-0.299635	-0.045031	-0.228228	-0.031232	-0.152024	-0.207316	-0.096189	-0.257317	0.058968	-0.033381	-0.015908	-0.013581	-0.401257	0.038513	-0.499948	-0.058545		0	13
RP11-17L8	2	20096061	20273620	-0.227425	-0.271883	-0.14804	-0.06382	-0.142431	0.333589	0.015934	-0.110333	0.061041	-0.08327	0.020707	-0.088308	0.1503	0.138732	0.064234	-0.008193	0.116384	-0.083523	0.036205	-0.177875	-0.01997	-0.000564	-0.18377	0.062006	-0.21801	0.063948	-0.132676	0.060808	-0.032299	-0.257165	0.121207	-0.0662197	0.08778		1	13
RP11-23F10	2	21385612	21429807	-0.343958	-0.421616	-0.261042	-0.140825	-0.194285	0.356097	-0.107644	-0.170008	0.0345617	-0.303676	-0.099953	0.012405	-0.045491	-0.00998	0.058835	0.038311	0.154126	-0.123051	-0.146637	-0.253785	-0.155664	-0.115009	-0.278329	-0.162533	-0.280296	0.074672	-0.211259	-0.093753	-0.042323	-0.374137	0.159706	-0.465287	0.101847		1	13
RP11-368O18	2	22469792	22686173	-0.343061	-0.547666	-0.273906	-0.307253	-0.296727	0.405207	-0.159899	-0.261834	-0.116364	-0.302333	-0.05565	0.126918	-0.207724	0.202935	-0.045146	0.002651	0.030341	-0.366055	-0.057159	-0.289184	-0.080329	-0.096607	-0.220047	-0.09061	-0.302902	-0.023123	-0.278938	0.022829	-0.030605	-0.327781	-0.116013	-0.499976	-0.0752783		1	13
RP11-560C7	2	23056715	23241165	-0.47573	-0.539173	-0.323857	-0.223062	-0.246819	0.493935	-0.248533	-0.220107	0.161833	-0.290815	-0.008955	-0.112184	-0.133667	-0.04406	0.034727	-0.048885	-0.036773	-0.28078	-0.071355	-0.277413	-0.153319	-0.220154	-0.352254	-0.157941	-0.307696	-0.091136	-0.030289	-0.115595	0.026207	-0.404034	-0.119294	-0.125147	0.014859		1	12
RP11-557N21	2	23728364	23940106	-0.492314	-0.599095	-0.386949	-0.309032	-0.293405	0.351868	-0.258434	-0.289359	0.161599	-0.351144	-0.121682	-0.127864	-0.159025	-0.099033	0.039219	-0.017438	0.08568	-0.372375	-0.164823	-0.202179	-0.080592	-0.208138	-0.37275	-0.185359	-0.295479	-0.091352	-0.083804	-0.018245	-0.012914	-0.429142	-0.152092	-0.063631	-0.059197		1	12
RP11-169L20	2	24763124	24933828	-0.215368	-0.467014	-0.228769	-0.362993	-0.281762	0.294854	-0.2977	-0.158758	0.104284	-0.328691	-0.002358	-0.239816	-0.194207	0.251666	2.8e-05	0.002211	0.018029	-0.38946	0.068736	-0.182874	-0.107238	0.012905	-0.025384	-0.107179	-0.163053	-0.063494	-0.028364	0.150426	0.023951	-0.273599	0.031528	0.081451	0.015499		2	11
RP11-404P12	2	25755114	25929006	-0.361291	-0.33189	-0.112204	-0.047334	-0.155877	0.273855	-0.065051	-0.1744	-0.074734	-0.45056	-0.042581	-0.153098	-0.033953	0.270766	0.071698	0.059253	0.115553	-0.138102	-0.074202	-0.232016	-0.062505	-0.097159	0.044518	0.072291	-0.20212	0.007817	0.070007	0.147806	-0.048694	-0.334394	0.162378	-0.036731	-0.048151		2	10
RP11-106G13	2	26879348	27048339	0.259977	-0.053546	0.323022	-0.036523	-0.007994	0.312137	0.201538	-0.185546	-0.094775	0.052582	-0.318545	-0.048542	0.063106	0.20686	0.103402	-0.145382	0.052052	0.145683	0.174536	0.030664	0.034577	0.075402	-0.060667	0.037502	0.290369	0.054797	-0.0711496	0.110663	-0.041053	0.041422	-0.01014	0.588063	-0.215596		3	9
RP11-373D23	2	28472604	28630268	-0.400559	-0.36824	0.12533	-0.016016	-0.232556	0.378682	-0.185235	-0.212256	0.032197	-0.110484	-0.018292	-0.181299	0.24505	0.19156	0.086757	-0.095732	0.029303	-0.11264	0.03881	-0.081241	0.020341	-0.11226	-0.038249	-0.109067	-0.204371	-0.033158	-0.072837	0.07315	0.025703	-0.300501	0.197104	-0.054351	-0.004487		3	9
RP11-328L16	2	29319259	29511907	-0.406397	-0.5194	0.249817	0.120388	-0.150336	0.168177	-0.192439	-0.304858	0.037817	-0.231193	-0.000717	-0.293911	-0.036189	0.215018	0.064697	0.071106	0.053612	-0.088251	-0.106652	-0.264954	-0.127841	-0.215488	-0.098845	-0.130017	-0.234108	-0.05056	0.018178	0.020776	0.071026	-0.361258	0.139227	-0.061017	0.00868412		3	9
RP11-23B13	2	30723725	30891313	-0.352598	-0.444516	0.374341	-0.016748	-0.249095	0.394808	-0.157538	-0.263131	-0.130001	-0.340394	0.116741	-0.243006	0.014193	0.199167	-0.132942	0.016187	-0.060574	0.011592	-0.088585	-0.12322	0.014803	-0.122582	0.025504	-0.060231	-0.063813	-0.070086	0.08042	0.095328	-0.005703	-0.364078	0.149084	0.467105	-0.072686		4	9
RP11-540E17	2	31515073	31517604	-0.469255	-0.369925	0.497211	-0.01705	-0.21737	0.366186	-0.294851	-0.566086	-0.0592093	-0.361296	0.145233	-0.070481	0.024392	0.192576	-0.022401	0.031735	-0.043174	-0.266275	0.000254	-0.174215	-0.131549	-0.20171	-0.007742	-0.154214	-0.138359	-0.144942	-0.072354	0.006706	-0.04364	-0.327322	-0.091712	0.312767	-0.109799		4	9
RP11-559D11	2	32541774	32708072	-0.092918	0.063931	0.715639	0.326199	-0.068862	0.207347	0.196606	-0.048649	0.180564	-0.170901	0.16232	-0.072472	0.089247	0.555948	0.380083	0.1018	0.292527	0.108303	0.065439	-0.154372	-0.050781	0.246086	0.202891	0.245047	0.211247	0.141866	-0.089762	0.196793	-0.069146	-0.021717	0.003838	0.471949	0.165709		4	9
RP11-258F20	2	33085144	33267987	-0.144747	-0.185556	0.459482	0.045707	-0.097953	0.263392	-0.056683	-0.316625	-0.03415	-0.248844	0.064696	-0.134969	0.001824	0.279627	-0.059776	-0.030339	0.043283	0.100201	0.016266	-0.243047	-0.002589	-0.114705	-0.022348	0.052262	0.153427	-0.110611	-0.164942	0.133492	-0.14579	0.009152	0.059634	0.206029	-0.152154		4	9
RP11-257N21	2	34269223	34461563	-0.118223	-0.335938	0.564189	0.04877	-0.23385	0.214017	-0.026083	-0.241939	-0.11174	-0.486084	-0.072277	-0.105193	-0.239561	0.366851	0.151295	0.099859	0.14884	-0.029797	-0.053753	-0.254741	-0.029682	0.016234	0.068903	0.04924	-0.025213	0.101364	-0.082203	0.034367	-0.078082	-0.227786	-0.042523	0.252893	-0.165748		4	9
RP11-153O16	2	35079312	35171360	-0.282338	-0.236144	0.431936	0.030622	-0.190787	0.195657	-0.136457	-0.296576	0.050005	-0.299698	-0.112855	-0.005761	-0.145799	0.223097	0.410986	-0.013319	0.10056	-0.19718	0.005941	-0.151915	-0.122401	0.000715	-0.030272	0.030727	-0.07288	0.112541	0.0118063	-0.08216	-0.008784	0.090986	0.070541	0.201015	0.055279		4	9
RP11-288C18	2	36963151	37043697	-0.276557	-0.284788	0.710189	0.015461	-0.215903	0.363016	-0.094323	-0.441654	-0.193552	-0.268549	0.071884	-0.337693	-0.046534	0.420955	0.012561	0.039792	0.005551	-0.067256	0.14755	-0.215115	-0.11387	-0.149333	0.039703	-0.0223467	-0.060893	-0.019555	-0.245236	0.121069	-0.04837	-0.250005	0.019131	0.344011	-0.07181		4	9
RP11-278G12	2	37708317	37896675	-0.265278	-0.291382	0.544742	0.27959	-0.139041	0.362599	-0.151341	-0.247201	0.085765	-0.198036	-0.000468	-0.308427	0.121587	0.392161	0.040808	0.060764	0.04693	-0.102598	0.02715	-0.146099	-0.015544	-0.095653	0.041924	0.028801	0.007441	0.018598	-0.142647	0.046018	0.017358	-0.263192	-0.116672	0.262042	-0.105011		4	9
RP11-173C1	2	39065415	39245859	-0.223188	-0.29116	0.540302	0.215208	-0.134512	0.0207999	-0.010763	-0.165892	0.049436	-0.104018	0.040529	0.0627	-0.076476	0.351964	0.136432	-0.034265	0.163298	-0.068013	0.012544	-0.354569	-0.110456	-0.066868	0.0866	0.071483	-0.01175	0.0198765	0.144751	0.118662	0.010099	-0.212785	-0.100717	0.664881	0.150746		4	9
RP11-395B14	2	39597417	39749571	-0.258535	-0.399319	0.539862	0.170412	-0.312932	0.351917	-0.158453	-0.436118	-0.15772	-0.439317	0.025876	-0.110418	-0.090292	0.390402	-0.011377	0.07649	0.056694	-0.129612	0.014861	-0.203381	-0.086503	-0.095039	0.138462	-0.0961474	-0.096781	-0.002645	-0.093113	0.166071	-0.042594	-0.34257	-0.055066	0.480758	-0.068419		4	9
RP11-457F14	2	40404846	40584188	-0.449028	-0.644769	0.313966	0.082569	-0.0942	0.219634	-0.257341	-0.359338	-0.070867	-0.59479	0.085364	-0.148426	-0.166692	0.020083	-0.156273	-0.070427	-0.046558	-0.262677	-0.110575	-0.08421	-0.024848	-0.14599	-0.007886	-0.123639	-0.107085	-0.104781	-0.088881	0.057571	0.073249	-0.463797	-0.171728	0.530561	-0.065323		4	9
RP11-299C5	2	42391941	42576890	-0.208599	-0.212473	-0.001515	0.385292	-0.018564	0.235105	-0.109068	-0.236825	-0.03332	-0.348144	0.064584	0.051904	0.133413	0.075874	0.140612	0.071416	0.20406	0.054415	-0.008967	-0.205876	0.082974	0.008198	0.099524	0.030202	-0.043954	0.046847	-0.119186	0.205274	-0.030797	-0.169912	-0.018429	0.641037	0.032469		3	9
RP11-204D19	2	43576392	43756737	-0.07677	-0.186685	0.049786	0.0468203	-0.001601	0.0091783	0.069252	-0.108508	0.076245	-0.173301	-0.018923	-0.222187	0.101922	0.119167	0.032474	0.037764	0.212451	-0.146857	0.082184	-0.280241	-0.048243	0.021209	-0.002024	0.098195	-0.087605	0.077071	-0.093825	0.14023	0.060613	-0.155067	0.144827	0.769737	0.069169		2	9
RP11-24I5	2	44331849	44500661	-0.314263	-0.485057	-0.06267	0.257432	-0.142317	0.132242	-0.181407	-0.215376	0.002212	-0.41451	0.007763	-0.106348	-0.089966	-0.00539	0.146664	0.025104	0.085289	-0.152446	-0.003566	-0.261411	-0.08235	-0.052121	0.028351	-0.051177	-0.021773	0.0369371	-0.0687972	0.082068	-0.0086246	-0.285098	-0.108798	0.602743	-0.036322		2	9
RP11-27C22	2	45951965	46143177	-0.426593	-0.613199	-0.118168	0.279825	-0.232845	0.191711	-0.303278	-0.313006	0.036571	-0.32832	-0.015458	-0.215019	-0.123222	-0.054707	-0.089842	-0.037003	0.022305	-0.233164	0.008531	-0.217202	-0.094523	-0.2214	-0.015474	-0.128484	-0.180713	-0.115842	-0.169991	0.014011	-0.018178	-0.470153	-0.07898	0.589478	-0.152443		2	9
RP11-110G2	2	46163218	46355170	-0.157419	-0.051232	-0.116024	0.078401	-0.068444	-0.100055	-0.220725	-0.16094	-0.066871	-0.060859	0.020104	-0.19584	-0.016649	0.047121	-0.033107	-0.100485	-0.069978	0.162068	0.163289	0.106455	0.04647	-0.178399	0.101746	0.111095	0.022236	-0.148154	-0.013291	0.132789	0.058547	-0.190142	0.100208	0.64629	0.10755		2	9
RP11-436K12	2	47752134	47752933	-0.324643	-0.388714	-0.118176	0.130957	-0.087451	-0.242387	-0.253056	-0.262226	-0.050019	-0.431336	-0.008628	-0.190396	-0.050469	0.056731	-0.07676	-0.056847	-0.033092	-0.136906	0.022785	-0.221721	-0.123618	-0.180992	0.020842	-0.027628	-0.177697	-0.023354	-0.167418	0.186154	0.004672	-0.328646	-0.159644	0.550764	0.004223		2	9
RP5-960D23	2	47831892	47955823	-0.0808428	-0.213107	-0.039712	0.183203	-0.024248	-0.337639	-0.086374	-0.159963	-0.171497	-0.270575	0.065788	-0.066558	0.046115	0.11084	0.080415	-0.003052	0.103439	0.045358	-0.067816	-0.184087	-0.010621	-0.062987	0.125888	0.087694	0.003148	-0.06052	-0.0101361	0.196992	-0.03557	-0.157334	-0.041664	0.722725	0.04564		2	9
RP11-19A8	2	48996696	49151284	-0.414776	-0.611713	-0.144089	0.114941	-0.128773	-0.417293	-0.3114	-0.253186	-0.055607	-0.493074	0.021621	-0.126088	-0.26481	-0.114169	0.059559	-0.010766	-0.047423	-0.162615	-0.089432	-0.264777	-0.096783	-0.243143	-0.073082	-0.175356	-0.209832	-0.061832	-0.008964	-0.066274	0.002259	-0.461163	-0.196505	0.245655	-0.194195		2	9
RP11-436L21	2	49217438	49217902	-0.365929	-0.560506	-0.126321	0.084609	-0.240953	-0.370589	-0.206383	-0.173889	-0.050901	-0.473707	-0.121964	-0.064584	-0.266648	0.032137	0.072091	-0.018872	0.065358	-0.246911	-0.096625	-0.211763	-0.128527	-0.135438	-0.067861	-0.180323	-0.126397	-0.032329	-0.251798	-0.015711	-0.070898	-0.292474	-0.09686	0.404635	-0.135747		2	9
RP11-319N5	2	50445029	50606403	-0.276868	-0.426033	-0.071853	0.285965	-0.046426	-0.28993	-0.111317	0.051774	-0.054446	-0.372761	-0.002605	0.077586	-0.076423	0.128324	0.132927	0.063258	0.214979	-0.143306	-0.063008	-0.138448	0.019392	-0.021788	0.125496	0.074469	-0.002809	0.138027	-0.148748	0.030241	-0.006238	-0.259433	-0.127991	0.101227	-0.101688		2	9
RP11-5M9	2	50457090	50618861	-0.392454	-0.423721	0.006962	0.193805	-0.245446	-0.143684	-0.083031	-0.097217	0.006848	-0.353439	-0.003431	-0.0682159	-0.124267	0.184015	0.020845	0.032673	0.16075	-0.266201	0.027848	-0.209964	-0.109208	0.007965	0.161781	0.041534	0.018971	0.12417	-0.114876	0.03876	-0.047292	-0.270735	-0.107514	0.613456	-0.0586137		2	9
RP11-391D19	2	51007849	51197816	-0.001292	-0.572829	0.055149	0.126546	-0.413744	0.1489	-0.143853	-0.436692	0.015671	-0.305568	-0.082435	0.041778	0.289724	0.18268	-0.019259	0.151679	0.08692	0.060172	0.182711	-0.207558	0.002826	0.052988	-0.15953	-0.033942	-0.130715	0.030268	0.091203	0.149071	0.015296	-0.301089	0.004106	0.398838	-0.129192		2	9
RP11-389K20	2	52103840	52291971	-0.353565	-0.47601	-0.133222	0.180442	-0.246506	-0.359119	-0.10996	-0.108242	-0.065007	-0.477475	-0.061085	-0.016362	-0.227979	0.057364	0.006814	-0.018043	0.130452	-0.093484	-0.110196	-0.210754	-0.071143	-0.004096	0.005729	-0.029049	-0.069376	0.041413	0.00211	-0.01066	-0.095663	-0.352518	-0.25595	0.608764	-0.132406		2	9
RP11-335O22	2	52251412	52431359	-0.144678	-0.375855	0.069448	0.320022	-0.006256	-0.256952	0.022026	-0.012985	-0.124278	-0.268474	-0.075678	0.093998	-0.174502	0.27662	0.339373	0.18598	0.22641	-0.062455	-0.046507	-0.152438	-0.084139	0.104411	0.124466	0.0626874	-0.13813	0.082915	-0.103454	-0.046043	-0.059136	0.132443	0.050441	-0.0399291	-0.099752		2	9
RP11-7H13	2	52962105	53159432	-0.110658	-0.168286	0.072846	0.231695	-0.126051	-0.023862	0.015895	0.015487	-0.007162	-0.127052	0.020289	0.0747798	-0.093215	0.492288	0.173132	0.040552	0.106514	-0.063391	0.372541	-0.32873	-0.150504	0.0341172	0.118806	0.14616	-0.16751	0.074784	-0.121242	0.187972	-0.123812	0.189715	0.014572	0.508202	-0.116577		2	9
RP11-508L23	2	53851904	53965092	0.03807	-0.03936	0.023758	0.24463	-0.107585	-0.111475	-0.024671	-0.149717	-0.110542	-0.405552	0.099551	0.097262	0.065119	0.328466	0.027657	0.102207	0.149694	-0.044175	0.108918	-0.255623	-0.096102	0.063137	0.155297	0.166199	-0.040364	0.033834	0.051339	0.118827	-0.060698	-0.158929	-0.003323	0.510826	0.116925		2	9
RP11-30C22	2	54867309	54977151	-0.281631	-0.391617	-0.04304	0.0701949	-0.107711	-0.0978382	-0.027947	-0.16288	0.06002	-0.309345	0.067309	-0.304583	-0.066834	0.265773	0.086125	0.091244	0.062671	-0.15537	-0.036926	-0.325506	-0.133219	-0.167939	-0.103538	0.019842	-0.096368	-0.066036	-0.115028	0.046831	0.059766	-0.291377	-0.095523	0.794706	-0.0775714		2	9
RP11-152O18	2	55725498	55892723	-0.218223	-0.187767	0.062943	0.172641	-0.110319	-0.135443	-0.176713	-0.232968	0.014261	-0.150442	0.094876	0.209435	0.020384	0.365798	0.017018	0.044094	0.015081	-0.165721	0.131343	-0.093754	-0.138508	-0.046045	0.084656	0.011112	0.009012	-0.099207	-0.026088	0.160512	0.016034	-0.22595	-0.009461	0.579579	0.271336		2	9
RP11-201J10	2	57196182	57352998	-0.240955	-0.352338	-0.016588	0.136177	-0.128664	-0.239954	-0.032204	-0.011426	0.078124	-0.311138	-0.098984	0.117245	-0.150833	0.367062	0.103025	0.034644	0.27544	-0.129136	-0.035784	-0.279176	-0.187421	0.119848	0.033138	0.067743	0.169765	0.107547	-0.132495	-0.044811	-0.0904	-0.255082	-0.16214	0.0773219	0.009402		2	9
RP11-260K8	2	59017476	59199494	-0.181578	-0.522506	-0.191838	-0.087062	-0.291522	-0.159997	-0.138907	-0.15566	-0.158131	-0.366737	0.008134	-0.114537	-0.27561	0.272272	-0.15753	0.035342	-0.033082	-0.147252	-0.077422	-0.176582	-0.015191	-0.047497	0.045266	-0.073997	-0.104146	-0.094444	-0.032162	0.091822	-0.093659	-0.262875	-0.119803	0.551886	-0.134759		2	9
RP11-440P5	2	60611241	60748249	-0.448699	-0.63894	-0.20807	-0.120322	-0.090848	-0.282062	-0.281208	-0.185829	0.187789	-0.282541	-0.046868	-0.152318	-0.015866	0.18545	0.20543	0.000151	0.035726	-0.303898	-0.073268	-0.187969	0.010074	-0.160415	-0.11084	-0.15748	-0.154632	0.052862	-0.074146	0.013696	-0.092048	-0.444573	-0.195028	0.874505	-0.086845		2	9
RP11-373L24	2	60985332	61194391	-0.227555	-0.426617	-0.073713	0.064704	-0.010545	-0.354702	-0.050262	-0.091933	0.048537	-0.31235	0.034256	-0.043047	0.099979	0.33047	0.052104	-0.043835	0.219285	-0.07168	-0.018019	-0.250708	-0.000708	0.026645	0.047742	0.070239	-0.01252	0.118288	-0.220524	0.155464	-0.035486	-0.27004	-0.115623	0.001515	0.002458		2	9
RP11-479F13	2	61344731	61438814	-0.226457	-0.253935	0.018677	0.154222	-0.12432	-0.417474	-0.020687	-0.040389	0.028463	-0.299916	0.043864	0.015564	0.046071	0.35808	0.104047	0.072334	0.258403	-0.173492	-0.013382	-0.174801	-0.056825	0.115345	0.109042	0.126605	0.112341	0.12613	-0.026248	0.187413	-0.090137	-0.168747	-0.112131	0.192238	-0.018746		2	9
RP11-52F10	2	62653646	62800899	-0.191168	-0.403333	0.042958	0.044127	-0.063032	0.032447	0.044047	-0.229772	0.014953	-0.158204	-0.005581	-0.008174	0.021687	0.278689	-0.035171	-0.020573	0.083848	-0.282702	0.102856	-0.241186	-0.14876	-0.132956	-0.009595	0.132719	-0.000405	0.129802	-0.056633	0.065381	0.056488	-0.179318	-0.122877	0.505497	-0.002559		2	9
RP11-568N6	2	64536417	64734503	-0.292677	-0.663477	-0.280499	-0.045147	-0.25594	-0.132222	-0.22084	-0.291922	-0.111854	-0.509466	-0.142952	-0.128988	-0.061211	0.211457	0.01491	0.0435	-0.015865	-0.095273	-0.132492	-0.124509	0.004938	-0.074427	0.01659	-0.185008	-0.201362	0.029871	-0.000893	0.104935	-0.02346	-0.315098	-0.144169	-0.019856	-0.121706		1	9
RP11-263L17	2	65644944	65804042	-0.408468	-0.545799	0.013343	-0.002863	0.046071	-0.072219	-0.242756	-0.303475	-0.016214	-0.416873	0.131134	-0.148899	-0.04596	0.362241	0.019021	0.031372	-0.027547	-0.058575	-0.051809	-0.198424	-0.185495	-0.194182	-0.035695	-0.02869	-0.191055	0.038241	-0.039748	0.041805	-0.036335	-0.398853	-0.002734	-0.092189	-0.115365		1	9
RP11-554F14	2	66452255	66634716	-0.285478	-0.504957	-0.085393	-0.020599	-0.118005	0.059018	-0.114264	-0.141066	-0.002054	-0.296561	-0.012446	-0.184852	-0.122797	0.123215	-0.008548	-0.051536	0.091514	-0.282907	0.034734	-0.247745	-0.152171	-0.134245	-0.096261	-0.032598	-0.093667	0.063133	-0.193638	-0.011756	0.02422	-0.300042	-0.214082	0.048417	-0.04413		1	9
RP11-547F18	2	67036017	67212337	-0.382813	-0.631925	-0.182785	-0.029414	-0.122843	-0.069119	-0.203857	-0.172304	-0.024305	-0.530026	-0.002354	-0.082758	-0.26402	0.161327	0.00883	-0.0074974	0.026934	-0.242011	-0.136296	-0.234553	-0.056621	-0.157623	-0.033149	-0.096975	-0.114391	0.06527	-0.08469	-0.030435	-0.047944	-0.380725	-0.179834	-0.027907	-0.158284		1	9
RP11-67K11	2	68065385	68221272	-0.290889	-0.594587	-0.178302	-0.087667	-0.113191	-0.160729	-0.19885	-0.253497	-0.125829	-0.504082	0.034031	-0.214344	-0.222465	0.257284	-0.075413	0.003237	-0.010559	-0.120053	-0.102115	-0.146116	-0.080745	-0.13701	0.040626	-0.083341	-0.121696	0.025091	-0.053863	0.041835	-0.052638	-0.398244	-0.129463	-0.014195	-0.087377		1	9
RP11-304A15	2	68918397	69082390	-0.315699	-0.567649	-0.099638	-0.029349	-0.07761	0.024013	-0.232895	-0.199406	0.062333	-0.367822	0.029191	-0.237144	0.179146	0.185352	0.010616	-0.016882	0.005439	-0.170155	-0.065953	-0.266712	-0.025556	-0.144847	-0.021851	-0.121425	-0.15154	0.027511	-0.0577471	0.04622	-0.018281	-0.363335	-0.090895	0.063833	-0.005754		1	9
RP11-245N4	2	70432669	70572501	-0.142937	-0.341592	-0.385363	-0.151777	-0.160489	0.133278	-0.093232	-0.166201	-0.111373	-0.258882	-0.043049	0.005235	-0.096845	0.147723	-0.041305	-0.084193	-0.035148	0.072831	0.040351	-0.130305	0.019221	0.069784	-0.162416	-0.006612	-0.063031	-0.057235	0.199836	0.079299	-0.045061	-0.378241	0.005467	0.158521	0.115944		1	9
CTB-11K1	2	70935636	70936133	-0.110097	-0.550543	1.01392	0.039042	-0.34396	0.242477	-0.220666	-0.413835	0.060158	-0.427648	-0.031332	-0.030849	0.167346	0.033356	0.023285	0.110975	0.001183	-0.003464	0.067195	-0.376015	0.033527	-0.0766771	-0.226717	-0.206086	0.386432	-0.019277	-0.038669	0.013278	0.02373	-0.382568	-0.036992	-0.026462	-0.041915		1	9
RP11-343N14	2	72305490	72486704	-0.336614	-0.538489	-0.286407	0.012497	-0.195465	0.036096	-0.231836	-0.200281	-0.020117	-0.474301	0.098465	-0.177644	-0.03228	-0.196395	0.0215333	-0.039415	-0.051775	-0.155353	-0.047556	-0.169607	-0.021358	-0.144314	-0.209622	-0.130002	-0.060685	0.029686	-0.074322	0.052286	-0.078447	-0.355036	-0.036448	0.150824	4.9e-05		1	9
RP11-434P11	2	73728650	73941722	-0.309159	-0.279628	0.016413	0.309902	-0.076474	-0.059469	-0.111875	-0.130247	-0.008436	-0.248922	-0.057258	-0.123888	0.143698	0.174301	0.063086	0.037833	0.133799	-0.048662	0.022957	-0.239074	-0.052302	0.0900389	-0.056656	-0.0255941	-0.062715	0.138751	-0.223476	0.179701	-0.072719	-0.115615	0.003873	-0.007473	-0.109964		1	9
RP11-1P9	2	74393573	74482924	-0.179087	-0.396718	-0.201545	-0.021669	-0.225235	0.019495	-0.180024	-0.365644	-0.190463	-0.283743	-0.023939	-0.058995	-0.017329	0.172133	-0.040069	-0.007695	-0.070082	-0.104499	0.050456	-0.207278	-0.043133	-0.152871	-0.083544	-0.104963	-0.329779	-0.038239	0.002022	0.067089	-0.084909	-0.288146	-0.096879	-0.022603	-0.006185		1	9
RP11-335E8	2	76231201	76416374	-0.224015	-0.308485	0.01257	0.348599	-0.011768	-0.173878	0.158659	0.054043	-0.040584	-0.3815	-0.043719	-0.0122569	-0.076843	0.216653	0.132665	0.050658	0.248719	0.013643	-0.080802	-0.067267	-0.091462	0.091984	-0.164451	0.115237	-0.006134	0.199336	-0.271106	0.012655	-0.086012	-0.17054	-0.124485	-0.012638	-0.0237072		1	7
RP11-535E19	2	77189692	77253947	-0.237579	-0.465811	-0.145923	0.259694	-0.013671	0.042951	0.007607	-0.078375	0.088533	-0.208258	-0.04273	-0.030574	-0.153794	0.085114	0.11803	-0.009108	0.191264	-0.263057	0.100713	-0.088956	-0.203973	0.071507	-0.119068	0.015252	-0.109287	0.11537	-0.051899	-0.07047	0.075092	-0.198431	-0.120209	0.219195	0.001488		1	7
RP11-9O10	2	77992250	78146869	-0.284576	-0.390383	-0.11729	0.196491	-0.05825	0.003943	-0.032278	0.078983	0.034065	-0.248238	-0.067083	-0.054615	-0.037883	0.102171	0.214113	0.040284	0.173269	-0.091224	-0.051025	-0.101677	-0.130797	-0.010956	0.108339	0.089841	-0.053983	0.133686	-0.229543	-0.059419	-0.03299	-0.150406	-0.114872	-0.021534	0.178408		1	7
RP11-419E14	2	78797793	78987258	-0.206791	-0.404765	-0.165235	0.058256	-0.161754	-0.083454	-0.011225	0.021499	0.117874	-0.352232	-0.060957	-0.098233	-0.028752	0.043382	0.165099	0.011206	0.07722	-0.158168	0.082656	-0.13859	-0.146401	-0.096202	-0.056092	0.0827847	0.016433	0.024351	-0.149183	-0.047161	-0.058045	-0.14572	-0.18698	0.035682	0.127365		1	7
RP11-458O14	2	79877922	79980541	-0.331314	-0.501616	-0.105285	0.223111	-0.14399	-0.098398	-0.115821	0.068456	-0.038522	-0.433682	-0.136589	-0.0298803	-0.045167	0.173246	0.052315	0.090224	0.189185	-0.242134	0.014021	-0.040639	-0.121245	0.014643	-0.152102	0.019345	-0.074285	0.108101	-0.288026	-0.045819	-0.133551	-0.297745	-0.215313	-0.139064	-0.103235		1	6
RP11-303I4	2	80715784	80867025	-0.360643	-0.408214	-0.113045	0.214781	-0.235699	0.016844	-0.129599	-0.052689	-0.084896	-0.457488	-0.013458	-0.096482	-0.174877	0.107836	0.031386	-0.013323	0.112048	-0.139148	-0.059134	-0.009653	-0.000329	-0.072794	-0.140907	0.048127	-0.02809	0.152831	-0.084317	0.021145	-0.065311	-0.314251	-0.158811	-0.090999	-0.131997		1	6
RP11-89C12	2	81677117	81821676	-0.047578	-0.635625	-0.039815	0.073056	-0.309702	-0.314284	-0.167769	-0.401348	-0.352928	-0.135466	-0.370292	-0.139917	-0.351389	-0.064046	-0.374509	-0.019658	-0.003608	-0.228009	-0.315319	-0.154482	-0.105622	-0.1682	-0.243605	0.033956	-0.286732	-0.106961	-0.017364	-0.13014	-0.154731	-0.448203	-0.119764	-0.266338	-0.071033		1	6
RP11-495B16	2	82669826	82774612	-0.224217	-0.463979	-0.153961	0.24027	-0.134811	-0.111668	-0.063687	0.166171	0.249064	-0.000124	-0.149382	0.026887	-0.094651	0.010007	0.134963	0.006463	0.239606	-0.296873	-0.046159	0.067699	-0.098661	0.094496	-0.052822	0.305899	-0.080203	0.138802	-0.220618	-0.0280682	-0.055698	-0.088334	-0.304162	0.507912	0.062578		1	6
RP11-548D17	2	83505932	83692618	-0.209996	-0.433611	-0.115638	0.127376	-0.023026	0.035291	0.051285	-0.079388	-0.143808	-0.304803	-0.0695683	-0.043008	-0.048156	0.601549	-0.067495	-0.027274	0.065336	-0.090781	-0.177126	-0.039308	0.061522	0.093099	-0.14792	0.424308	-0.258567	0.015019	0.047184	-0.028029	-0.042746	-0.204034	-0.073807	0.630164	0.00912117		1	6
RP11-513O19	2	85571823	85747516	-0.398145	-0.314891	0.125495	0.107904	-0.092828	0.225168	0.296374	-0.171928	0.029999	0.020544	-0.087871	-0.209678	0.353869	1.12757	0.048238	-0.021851	0.098283	-0.029929	0.027021	0.065663	0.01016	-0.105346	0.227724	0.246608	-0.079968	0.066142	0.149182	0.141326	-0.010537	-0.210842	0.002671	0.522103	-0.006002		2	6
RP11-301O19	2	86188635	86359354	-0.301402	-0.525745	0.047159	0.093432	-0.004127	0.073606	-0.016353	-0.281372	-0.067219	-0.123601	-0.022188	-0.144711	0.031357	1.11068	-0.032178	-0.009961	-0.061543	-0.154751	0.474583	0.117698	0.022451	-0.173826	0.150968	0.189991	-0.040286	-0.037121	0.511335	0.126229	-0.049796	-0.203446	-0.068062	0.263296	0.048798		1	6
RP11-21P18	2	88109843	88273126	-0.394563	-0.4707	0.072129	0.329486	-0.071966	0.178034	-0.072525	-0.359343	-0.137066	-0.128619	0.492514	-0.098767	0.079925	0.484637	0.029468	0.01697	-0.025756	-0.010773	-0.008409	0.075882	0.091216	-0.17876	-0.152636	0.190956	0.114094	0.035794	-0.064088	0.144899	0.019864	-0.258407	0.02468	0.140173	-0.016955		1	6
RP11-294I20	2	88997538	89163193	-0.387048	-0.591162	-0.071118	0.125546	-0.191691	0.201183	-0.120356	-0.23988	0.111023	-0.148897	0.28569	-0.207	-0.090142	0.476726	-0.063336	-0.047335	0.009608	-0.478441	-0.014305	0.001343	-0.022891	-0.042439	-0.120418	0.184298	0.305748	0.028065	-0.179445	0.062364	0.004582	-0.099515	-0.065979	0.189803	0.138806		2	5
RP11-316G9	2	89619699	89830899	-0.33826	-0.496035	-0.363939	0.338256	-0.098698	0.138883	-0.05196	-0.170798	-0.073939	-0.008382	0.469934	-0.039696	-0.026917	0.519627	-0.175089	0.085624	0.171046	-0.591428	-0.082345	0.050563	0.110591	-0.013531	-0.046372	0.286116	0.331722	0.140606	0.206624	0.170876	-0.034197	-0.113654	0.030847	0.264342	0.043245		2	6
RP11-71B7	2	94840306	95041912	-0.052475	0.136787	-0.019621	0.041515	-0.297453	0.2414	0.309332	0.180591	-0.07565	-0.191761	-0.319117	0.137563	-0.107709	0.361951	-0.0808	-0.046204	0.064322	-0.114062	0.349163	-0.299702	-0.093417	-0.009679	0.090124	0.128431	-0.120802	-0.10166	0.14921	0.184981	-0.05559	0.186764	-0.07376	-0.023519	0.0260252		4	5
RP11-34G16	2	95733908	95921790	-0.361739	0.516378	-0.258587	0.08339	-0.341057	-0.112033	0.682548	0.380597	-0.061627	-0.005317	-0.105149	0.0016155	0.094789	0.466392	0.031292	0.131816	0.009386	-0.008168	0.318587	0.043724	0.001854	-0.034089	0.184707	-0.059205	0.216748	-0.020095	0.016394	0.014985	0.006291	-0.110512	0.33675	0.025967	0.127654		5	5
RP11-363D14	2	96493360	96656080	-0.360165	0.439537	-0.30081	-0.131078	-0.321354	-0.076923	0.339826	0.257417	-0.018189	0.020472	0.070365	-0.236873	0.26061	0.3076	-0.017791	-0.068322	-0.168104	-0.191278	0.409048	0.105449	0.012005	-0.03838	0.238205	-0.258185	0.37539	-0.054199	-0.0387307	0.199789	-0.046761	-0.285362	0.277172	0.080962	0.079465		6	5
RP11-542D13	2	97564600	97795025	-0.225499	0.513152	-0.220334	0.144328	-0.200211	-0.208159	0.627698	0.481243	-0.021912	-0.02573	-0.073004	0.002635	0.0942	0.559118	-0.010711	0.073633	0.11457	-0.04359	0.37794	0.031331	0.035327	0.204949	0.335654	-0.095682	0.305744	0.059128	-0.199696	0.094759	-0.14067	-0.074089	0.212922	-0.117453	0.008952		6	5
RP11-547F10	2	98104038	98291335	-0.376079	0.517004	-0.322991	-0.085459	-0.292953	-0.132589	0.458816	0.103813	-0.054995	-0.00543	0.052375	-0.177093	0.080065	0.333303	-0.066751	-0.053347	-0.114772	-0.055009	0.369581	0.086111	0.024094	0.008109	0.308991	-0.23857	0.426741	-0.037643	-0.001334	0.133961	-0.082348	-0.239754	0.191015	0.109733	0.071833		6	5
RP11-38C17	2	99204128	99273607	-0.291718	0.553977	-0.216686	-0.013293	-0.36205	-0.148257	0.532042	0.067041	0.038031	-0.107464	-0.031267	0.032919	0.437487	0.494979	-0.089532	0.001851	0.030075	-0.110461	0.400244	-0.015709	-0.02475	0.139658	0.270556	-0.114459	0.338671	0.098629	-0.035721	0.207	-0.032316	-0.239756	0.195161	-0.014155	0.410566		6	5
RP11-549H5	2	100047310	100219883	-0.354469	0.409142	-0.334066	-0.059556	-0.413191	-0.067765	0.525876	0.069843	-0.039029	-0.060544	-0.087782	0.095987	0.061019	0.395246	-0.199145	-0.102739	-0.124605	-0.131521	0.366372	0.046779	0.075819	-0.0035	0.320184	-0.147289	0.450978	-0.019401	-0.03632	0.14418	-0.079451	-0.303911	0.136207	0.135158	0.002257		6	5
RP11-30G7	2	100209259	100384334	-0.484019	0.186482	-0.364899	-0.080079	-0.415187	-0.227736	0.393933	-0.061017	0.048845	-0.068202	-0.042218	0.028683	-0.024233	0.2157	-0.086683	-0.124832	-0.125972	-0.30318	0.344126	0.018337	0.007503	-0.083711	0.121009	-0.416033	0.302217	-0.069936	-0.097583	0.020831	-0.053308	-0.326428	0.065752	-0.21596	-0.012188		6	5
RP11-299H21	2	101163997	101371572	-0.194335	0.686838	-0.249243	-0.002309	-0.359214	-0.109979	0.577353	0.335721	-0.107736	-0.039424	-0.007732	0.090886	0.152279	0.394106	-0.080522	-0.016691	-0.07303	0.041781	0.357627	0.050284	0.103894	0.021722	0.358743	-0.143868	0.402516	-0.002827	-0.026441	0.158719	-0.081573	-0.32885	0.293684	0.067102	0.171088		6	5
RP11-451C2	2	102076852	102122664	-0.265527	0.456915	-0.329475	-0.084161	-0.396344	0.013945	0.420805	0.288702	-0.050054	0.093318	0.088324	0.039532	0.36777	0.240851	-0.066262	-0.063896	-0.146566	-0.013433	0.405374	0.055681	0.183259	0.0352525	0.311837	-0.114465	0.332471	-0.017082	0.117785	0.096605	-0.041831	-0.336532	0.180138	0.202977	0.151835		6	5
RP11-373G23	2	102805053	102986016	-0.21183	0.562475	-0.019148	0.144516	-0.280195	-0.0922698	0.492879	0.423357	0.008906	-0.050439	-0.074918	-0.053976	0.036669	0.412271	-0.015235	0.035973	0.113884	-0.105126	0.288021	-0.042581	-0.099637	0.150173	0.238745	0.032625	0.265414	0.071202	-0.156851	-0.079683	-0.022456	-0.112489	0.116734	-0.006022	0.197409		6	5
RP11-350B7	2	104959168	105141503	-0.260606	0.790689	-0.240062	-0.04088	-0.444324	-0.122153	0.479733	0.043392	-0.073654	-0.074325	0.009814	0.053053	-0.049592	0.560425	-0.135206	-0.009066	0.017114	-0.227948	0.020783	-0.010022	-0.104425	0.114259	0.336408	-0.011069	0.318087	0.110702	-0.147965	-0.071991	-0.038436	-0.385595	0.16286	-0.085549	-0.023909		6	5
RP11-526D2	2	105942305	106106184	-0.356475	0.913035	-0.251595	0.084901	-0.42695	-0.055242	0.578384	0.041081	-0.029648	-0.0201951	-0.021804	0.150848	0.090232	0.397946	-0.124245	0.009562	0.040598	0.083742	0.213713	0.031904	0.04214	0.088748	0.255456	-0.023948	0.34599	0.062807	-0.049003	-0.049086	-0.091788	-0.373112	0.156499	-0.00891	0.132592		6	5
RP11-519H15	2	106939463	107129303	-0.392577	0.60735	-0.332265	-0.002759	-0.318411	-0.200661	0.479755	0.130949	0.038569	-0.016025	-0.260056	0.001143	0.072683	0.225248	-0.03648	-0.004761	-0.094783	-0.137197	0.301439	0.073668	0.052772	-0.078938	0.197931	-0.173044	0.38317	-0.036429	0.027278	-0.03038	-0.025189	-0.230701	0.180446	0.029854	0.079659		6	6
RP11-443K8	2	108223698	108437172	-0.108206	0.645795	-0.058904	0.131454	-0.247159	-0.008725	0.430588	0.183469	-0.079256	0.063699	-0.112127	0.109679	0.129637	0.327331	0.121179	0.052675	0.045909	0.063471	0.296053	-0.059776	0.023078	0.099022	0.195954	-0.018704	0.276231	0.057567	-0.092401	-0.004189	-0.07095	-0.198652	0.134123	0.0740898	0.16194		6	6
RP11-566O4	2	109203284	109411854	-0.445844	0.142267	-0.318847	-0.026411	-0.493983	-0.198936	0.526069	0.03276	0.055989	0.096274	-0.465083	0.0670527	0.30175	0.342058	-0.08426	0.019896	-0.109286	-0.088476	0.260667	-0.017109	0.045202	0.002261	0.508313	-0.135876	0.343945	-0.049034	-0.327056	-0.027815	-0.095256	-0.471585	0.142794	0.084348	-0.0607668		6	6
RP11-528G9	2	110255188	110348736	-0.278932	0.075746	-0.281086	-0.084727	-0.382497	0.511503	0.337968	-0.035714	0.061149	-0.096296	-0.315282	0.0453526	0.049466	0.411805	-0.185535	0.018169	-0.125762	-0.398395	0.392112	0.005462	-0.054691	-0.018471	0.59232	0.171114	0.260399	-0.047883	-0.143008	-0.073155	-0.059976	-0.38398	0.180796	-0.036721	0.095562		7	6
RP11-438K19	2	111491532	111673028	-0.191931	0.006616	-0.221427	0.008219	-0.41617	0.456934	0.152331	0.00423	0.034255	-0.003466	-0.257015	0.001535	0.147162	0.330576	-0.024807	0.019304	-0.081753	-0.238046	0.30072	0.057467	0.014478	0.05863	0.413667	0.385375	0.213508	-0.058804	-0.060511	-0.066591	0.078707	-0.308088	0.215568	-0.138002	0.049094		7	6
RP11-368A17	2	113063687	113232083	-0.344862	0.301529	-0.08168	0.115741	-0.386858	0.618189	0.295281	-0.015491	-0.024693	-0.0224713	-0.126688	-0.062654	0.530223	0.437362	-0.076831	-0.017862	-0.035954	-0.085652	0.387646	-0.0375477	0.074021	0.020592	0.697128	0.397728	0.344302	0.015902	0.124876	0.174095	0.096611	0.141616	0.20447	-0.091972	0.059555		7	5
RP11-504G11	2	115568165	115730064	-0.228939	0.343029	-0.232122	0.142602	-0.456219	0.155337	0.513354	0.148141	-0.034246	-0.032513	-0.116936	0.155528	-0.074363	0.525468	-0.072271	-0.006297	0.177349	-0.002681	0.219341	-0.017756	0.019876	0.0899022	0.607556	0.0010084	0.358769	0.165192	0.043283	-0.02084	-0.049138	0.114597	0.136942	0.220477	0.0802556		7	5
RP11-412A2	2	115793324	115935996	-0.259208	0.321808	-0.234992	0.076369	-0.389605	-0.024824	0.478662	0.209682	-0.040845	-0.064463	-0.103863	0.065097	-0.168718	0.472274	-0.034849	0.097501	0.192517	-0.088372	0.687958	-0.101516	0.033485	0.261762	0.672987	0.039456	0.3843	0.167314	-0.101342	-0.068458	-0.036375	0.15206	0.101745	0.00205625	0.081548		6	5
RP11-339P1	2	116380661	116516523	-0.223457	0.296941	-0.183362	0.127292	-0.344367	-0.250821	0.494598	0.177372	-0.120592	-0.184604	-0.054993	0.104678	-0.00988	0.553366	0.039044	0.025356	0.093219	0.026828	0.757434	-0.065845	0.09035	0.121584	0.840421	0.089963	0.47206	0.08075	-0.082256	0.021898	-0.028311	0.257375	0.220397	-0.030443	0.058513		6	5
RP11-59P4	2	117162531	117350284	-0.27635	0.145392	-0.203212	0.077188	-0.360068	-0.241236	0.451225	0.213938	0.198115	-0.117072	-0.439213	0.127748	-0.140236	0.649834	0.094433	-0.001254	0.231029	-0.297189	0.789786	-0.06066	-0.060072	0.205516	0.560888	-0.010752	0.33375	0.10795	-0.207317	-0.149746	-0.014586	0.199942	0.125295	-0.186313	0.04379		5	5
RP11-425F6	2	118086841	118291560	-0.380232	0.141953	-0.242925	-0.049678	-0.380404	-0.202868	0.302231	0.046776	-0.099129	-0.206452	-0.386796	0.092187	-0.096481	0.308828	0.011946	-0.014194	-0.029336	-0.111716	0.671375	-0.014793	0.077765	0.048539	0.527816	0.270663	0.268111	0.024537	-0.0807692	-0.038748	-0.101506	0.000859	0.07832	0.0311237	-0.081897		5	5
RP11-19E11	2	119282005	119408043	-0.400724	0.056429	-0.305632	-0.046889	-0.388174	-0.154854	0.183505	-0.028313	0.002403	0.009579	-0.305179	-0.047613	0.072919	0.170016	6.9e-05	-0.100487	-0.112506	-0.162024	0.723193	0.05223	0.056564	-0.081613	0.532536	0.102401	0.348328	-0.089109	-0.106581	-0.134836	-0.019863	0.005044	0.093377	0.104761	-0.039374		5	5
RP11-77A13	2	119406044	119582597	-0.38048	-0.066596	-0.333722	-0.082924	-0.46224	-0.160221	0.309892	-0.024487	0.038072	-0.173138	-0.389063	-0.019563	0.004275	0.196168	0.053178	-0.088604	-0.083033	-0.222867	0.749017	0.027257	-0.010062	-0.074198	0.541453	0.189429	0.272072	-0.028926	0.012132	-0.237416	-0.093189	0.041084	0.128582	-0.09941	-0.11307		5	5
RP11-69O6	2	121703878	121875689	-0.603607	-0.043045	-0.432452	-0.242485	-0.5817	-0.171692	0.043151	-0.171217	-0.012541	0.099191	-0.83917	-0.105696	-0.04216	0.155316	-0.023098	-0.13059	-0.273727	-0.454832	0.781417	0.012206	0.060104	-0.160684	0.555064	0.118414	0.303619	-0.148584	-0.158639	-0.076526	-0.094468	-0.085105	-0.005084	0.162834	0.108379		5	5
RP11-202H24	2	122949983	122990114	-0.312915	-0.118141	-0.221954	0.080037	-0.451622	-0.175139	0.477888	0.169568	0.065037	-0.105387	-0.89136	0.003504	-0.208377	0.490232	-0.056545	0.014071	0.033316	-0.186302	0.737076	-0.054821	0.042707	0.089688	0.865272	0.346642	0.642717	0.124566	-0.232882	-0.120399	-0.110185	0.196495	0.164162	-0.053928	0.066596		5	5
RP11-11G20	2	125735245	125900995	-0.172689	-0.39381	0.032353	0.03252	-0.525972	-0.184041	0.255111	0.042106	0.091375	-0.481878	0.098812	0.086204	-0.1434	0.361979	-0.027864	0.083206	0.046314	-0.19945	0.273846	-0.08581	0.027936	0.125551	0.39072	-0.11526	0.575258	0.020912	-0.148275	-0.035946	-0.089327	-0.370883	0.077737	0.010612	0.033859		5	7
RP11-48K7	2	127088967	127253635	-0.398241	-0.418926	-0.50366	-0.253687	-0.548281	-0.137682	0.086265	-0.119061	-0.077063	-0.019204	-0.715225	-0.037193	-0.163273	0.15572	-0.234757	-0.124209	-0.240202	-0.166099	1.08838	0.083308	0.111996	-0.117052	0.357245	-0.280021	0.626565	-0.159457	0.019706	-0.078067	-0.08774	-0.50809	0.031559	0.022201	-0.143128		5	7
RP11-314L11	2	127792717	127998058	-0.225158	-0.185853	-0.213612	0.057946	-0.396518	-0.212998	0.398814	0.151902	-0.044681	-0.127172	-0.861468	0.092017	0.011667	0.479042	-0.021191	0.06016	0.067285	0.006636	1.09851	0.03645	0.161966	0.053205	0.641018	0.073069	0.679414	0.049639	-0.171527	0.030625	-0.099474	-0.349506	0.234499	-0.0253726	0.038467		5	7
RP11-207G14	2	129638035	129801083	-0.391178	-0.397907	-0.276768	0.033414	-0.431042	-0.149627	0.296292	0.120138	0.117152	-0.169671	0.201581	0.127114	-0.261866	0.43898	-0.006378	-0.020355	-0.00897	-0.180537	0.851918	-0.01137	-0.016814	-0.134669	0.743525	-0.088116	0.741394	0.040101	-0.088643	-0.089475	-0.126272	-0.402638	0.086058	-0.149443	-0.19557		5	6
RP11-32C20	2	130417795	130583205	-0.115826	-0.032779	0.04939	0.083216	-0.257876	-0.0791455	0.526894	0.158148	-0.01229	0.333253	0.061137	0.0524183	-0.032489	0.441004	0.01698	-0.03696	0.039237	-0.057495	1.18523	0.0225036	0.08574	0.022551	0.508334	0.098646	0.618435	0.130122	-0.0836073	0.070757	-0.197493	-0.162044	0.075732	-0.100315	-0.01258		6	6
RP11-510C1	2	131281833	131473372	-0.187556	-0.147535	-0.218114	-0.028945	-0.512924	0.041671	0.266225	0.034194	-0.070594	0.475619	0.280824	0.0474685	-0.072644	0.484766	-0.128185	-0.000479	0.007941	-0.0889431	1.31658	0.144603	-0.045407	-0.017774	0.759012	0.057424	0.69125	0.0766761	-0.0660234	0.054078	-0.0603859	0.0028828	0.142855	-0.013977	-0.086301		6	6
RP11-209H16	2	131615215	131788285	-0.064898	-0.242963	-0.09299	-0.252889	-0.279081	-0.03172	0.285293	0.095467	-0.005917	0.696401	0.318279	-0.00437	0.035569	0.196987	-0.1143	-0.244009	-0.155375	-0.211039	0.924959	0.073905	0.094729	0.007067	0.409774	0.003113	0.668311	0.073164	-0.0949217	0.166474	-0.159446	-0.259006	-0.070562	-0.04912	-0.170609		6	6
RP11-24O13	2	132110319	132114312	-0.271265	0.008822	-0.135901	-0.140602	-0.396872	0.101204	0.329408	-0.011065	-0.085537	0.661907	0.530146	0.08347	-0.081121	0.302443	-0.0540244	-0.124791	-0.053726	0.07329	1.02257	0.163561	0.033129	-0.048345	0.6149	-0.00613667	0.647115	0.016436	0.092656	0.102405	-0.122429	-0.244671	0.12768	0.167966	-0.00395943		6	6
RP11-1L22	2	133003528	133183138	-0.323553	-0.526861	-0.381366	-0.081273	-0.411453	-0.009114	0.044988	-0.080637	-0.047404	0.338128	0.27881	0.050735	-0.12906	0.32569	-0.119127	-0.029406	-0.140699	-0.245158	1.10328	-0.0934564	-0.1065	-0.519293	0.515928	-0.0983311	-0.095934	-0.053303	0.014748	-0.087334	-0.080338	-0.570684	0.100995	-0.083966	-0.186728		6	7
RP11-105K20	2	133630358	133805991	-0.142518	-0.263735	-0.164262	0.009351	-0.002625	-0.128812	0.075022	-0.152529	0.135889	0.112241	-0.39828	0.006644	-0.060077	0.137956	0.6305	-0.201975	-0.105945	-0.118748	0.259314	-0.013177	-0.064504	-0.175226	0.181966	-0.109875	-0.275773	-0.119183	-0.005174	-0.210515	-0.050722	-0.530066	0.04847	0.235592	-0.15839		6	7
RP11-250H22	2	133908838	134076663	-0.460929	-0.299432	-0.268266	0.046613	-0.509977	0.054414	0.295445	0.186456	0.079503	0.585566	0.083526	-0.057705	-0.246263	0.595007	-0.062904	0.039534	0.045316	-0.172071	0.264792	-0.070136	0.039707	-0.397586	0.84965	0.025822	0.148424	0.078035	-0.081904	-0.156323	-0.118365	-0.496737	0.163689	-0.222532	-0.088917		7	7
RP11-289K3	2	135756585	135908487	-0.330425	-0.14087	-0.223178	0.071829	-0.366937	0.184991	0.218107	0.044237	0.024957	0.495547	-0.364279	-0.041449	-0.130982	0.726538	0.007913	-0.008858	-0.049991	-0.1252	0.928769	-0.002899	-0.046189	-0.354053	0.379314	-0.040585	0.230705	0.062844	-0.026619	0.066475	-0.036113	-0.31655	0.228668	0.017868	0.042643		7	8
RP11-355I13	2	136992813	137204560	-0.348712	-0.285272	-0.341255	0.026766	-0.460449	0.322028	0.319312	0.135485	-0.052874	-0.493976	-1.05806	-0.02073	-0.269605	0.696667	-0.099973	-0.007888	-0.00287	-0.056622	0.54021	-0.010672	0.006479	-0.397862	0.346848	-0.079181	0.091827	0.059193	-0.136954	-0.077787	-0.130829	-0.471181	-0.187237	-0.063134	-0.07535		6	9
RP11-58C7	2	138186859	138373102	-0.122464	0.040706	-0.063414	0.2863	-0.393142	-0.101958	0.606449	0.358877	0.047882	-0.233483	-1.10969	0.11287	-0.128239	0.89951	-0.049843	0.06502	0.26733	-0.055427	0.688398	-0.28023	-0.129319	-0.185588	0.446773	0.231669	0.17655	0.189229	-0.049718	-0.06705	-0.049493	-0.250979	-0.145402	0.010159	-0.00342186		6	10
RP11-12M21	2	139646882	139815023	-0.032028	-0.091832	-0.124812	0.184597	-0.408719	-0.152795	0.508843	0.288364	-0.091176	-0.428372	-0.718967	0.184563	-0.044394	0.736721	0.002227	0.014877	0.20542	0.037342	0.44186	-0.26135	0.0277	-0.054248	0.434805	0.14014	0.141228	0.179021	-0.103003	0.013199	-0.125205	-0.209264	-0.076286	-0.03223	-0.099858		6	10
RP11-279M2	2	141580581	141681289	-0.145663	-0.028191	-0.130061	0.192484	-0.405589	-0.030844	0.516304	0.32167	-0.123319	-0.0665089	-0.956157	-0.054564	-0.119222	0.784854	-0.094008	0.016723	0.229764	-0.043999	0.637935	-0.285673	-0.069503	-0.107321	0.484549	0.214923	0.403582	0.241006	-0.08247	-0.014321	-0.082087	-0.294182	-0.167946	0.03523	0.0216819		6	10
RP11-215D12	2	142809515	142993635	-0.21813	-0.148407	-0.07582	0.158638	-0.48027	-0.103402	0.395527	0.317435	-0.040771	-0.250022	-0.466747	-0.019139	-0.150484	0.669994	-0.100901	0.030799	0.142458	-0.095299	0.582249	-0.279369	-0.094364	-0.148779	0.482413	0.147554	0.301638	0.173642	-0.185552	-0.051028	-0.064609	0.190955	-0.124137	-0.004143	0.101799		6	9
RP11-190J23	2	143616900	143784323	-0.160953	-0.040204	-0.208578	0.050417	-0.402317	0.32553	0.423482	0.30098	-0.01751	-0.31509	-0.357481	0.0628144	-0.027475	0.618622	-0.055927	0.021903	0.138063	-0.142705	0.508397	-0.086693	0.012239	-0.098243	0.415212	0.13295	0.280992	0.057011	-0.0622101	-0.051244	-0.064801	0.178227	-0.116462	0.109163	0.0156781		6	9
RP11-285H23	2	144706018	144897136	-0.134232	-0.154713	-0.154203	0.133645	-0.554793	-0.195948	0.35143	0.282632	-0.014265	-0.377392	-0.402514	0.017623	-0.116687	0.199808	-0.127691	0.057427	0.09564	-0.266217	0.744328	-0.010685	-0.034678	-0.275316	0.047421	0.043963	0.341323	0.161128	-0.393426	0.021722	-0.090914	0.232564	-0.115094	-0.039692	-0.019994		5	9
RP11-207O14	2	146708827	146893232	-0.105615	0.140346	-0.065179	0.278988	-0.334617	0.0313444	0.614887	0.439748	0.077264	-0.283673	-0.441191	0.0917597	-0.088184	0.202928	-0.031641	0.075596	0.332539	0.035052	0.498646	-0.277162	0.079443	-0.007162	0.040503	0.130705	0.335998	0.213108	-0.295028	-0.053594	-0.066726	0.344361	-0.180593	-0.013552	-0.132344		5	9
RP11-3P4	2	148045023	148206207	-0.328419	-0.266156	-0.250322	-0.016627	-0.580892	-0.03778	0.370411	0.067132	-0.134736	-0.340288	-0.485017	0.0254568	-0.100688	0.107932	-0.156107	-0.018189	-0.041005	-0.129333	0.702789	-0.304461	0.106289	-0.396311	-0.055833	-0.080069	0.07012	0.096741	-0.060277	-0.050198	-0.041694	0.119062	-0.158222	-0.054959	0.0234787		4	9
RP11-16J22	2	148126970	148305202	-0.15547	-0.253319	-0.248675	0.01736	-0.370682	-0.217341	0.31455	0.220817	-0.039018	-0.422327	-0.383899	0.181788	-0.272824	0.090598	0.051482	0.014179	0.028781	-0.180141	0.567957	-0.235674	0.092672	-0.254111	-0.102964	-0.134005	0.08709	0.053472	-0.01203	-0.080946	-0.10035	0.12867	-0.108958	-0.155589	-0.028949		4	10
RP11-329H24	2	150283160	150484067	-0.269775	-0.229584	-0.225766	0.184476	-0.487132	-0.101204	0.434101	0.026407	0.105832	-0.366321	-0.388674	-0.052052	-0.082235	0.055964	-0.037672	-0.015816	0.061956	-0.262601	0.048491	-0.28584	-0.119281	-0.308087	-0.149972	-0.098175	0.224091	0.110602	-0.109354	-0.052643	0.027789	0.208118	-0.199863	0.043556	0.09674		2	11
RP11-62P16	2	150720410	150896902	-0.343699	-0.345711	-0.269947	0.049866	-0.491523	-0.050515	0.347526	-0.034244	0.053253	-0.393875	-0.486138	0.057117	-0.14031	-0.014276	-0.019932	0.003632	0.055544	-0.211283	-0.110898	-0.293256	-0.088426	-0.374426	-0.153465	-0.038754	0.214839	0.030796	-0.101446	-0.034106	-0.103794	0.218998	-0.239997	0.08029	0.187678		2	11
RP11-21M18	2	150982258	151157148	-0.248933	-0.212553	-0.264561	0.12583	-0.410695	-0.036555	0.454283	0.025011	0.120036	-0.347572	-0.475336	0.183471	-0.119891	0.033475	0.356368	0.041894	0.093451	-0.186352	-0.154347	-0.226092	-0.074946	-0.250759	-0.186722	-0.162894	0.186646	0.134404	-0.232515	-0.109841	-0.051679	0.206822	-0.234039	0.047372	0.0415289		2	11
RP11-311L3	2	151943215	152103839	-0.394585	0.002459	-0.210571	0.086528	-0.318823	0.025812	0.363361	-0.172984	0.019278	-0.182338	-0.29333	-0.100398	0.162145	-0.044367	-0.029073	-0.063295	-0.115458	-0.089466	0.008121	-0.335538	-0.093677	-0.413162	-0.094142	0.019864	0.198822	-0.022792	-0.161376	0.040062	-0.099998	0.054516	-0.081333	0.007312	0.156164		2	11
RP11-458J7	2	152545587	152731072	-0.122596	-0.133635	-0.227445	-0.043687	-0.427524	0.156455	0.179084	-0.094404	-0.121609	-0.513805	-0.077657	0.065884	-0.045201	0.044634	-0.16916	0.0289	-0.080443	-0.138867	0.065266	-0.067163	-0.032171	-0.233911	0.000754	-0.067118	0.154993	-0.018427	-0.0411	0.104107	0.020102	0.112349	0.010714	0.058887	0.063723		2	11
RP11-547P13	2	153667420	153868986	-0.332105	-0.251506	-0.392689	-0.159737	-0.481132	-0.22033	0.210295	-0.139484	0.10249	-0.437261	-0.277684	-0.115517	-0.298102	-0.184194	-0.191569	-0.097029	-0.16642	-0.2085	-0.097484	-0.183555	-0.077515	-0.38886	-0.132131	-0.118307	0.212338	-0.074815	-0.15539	-0.05095	0.033948	0.129517	-0.222082	0.163494	0.032653		2	12
RP11-21L17	2	154544456	154698306	-0.199287	-0.181883	-0.263397	-0.072519	-0.467214	-0.0721274	0.25107	-0.095999	0.103911	-0.238572	-0.278134	0.0091111	-0.085767	0.070807	0.029443	-0.025893	0.034905	-0.220149	0.076208	-0.225846	-0.184262	-0.262285	-0.030945	-0.0922033	0.217803	0.06916	-0.103302	-0.057367	-0.07147	0.054248	-0.189462	0.099619	-0.039673		2	12
RP11-266L10	2	155644812	155824018	-0.079377	-0.328329	-0.262932	-0.012217	-0.443265	-0.072459	0.404235	0.015154	-0.078164	-0.34774	-0.314531	0.000672	-0.104385	0.192513	-0.125751	0.015249	0.104935	-0.279209	0.010461	-0.273629	-0.130469	-0.171002	-0.058278	0.038858	0.137759	0.144813	-0.183888	-0.060765	-0.07584	0.14521	-0.188408	-0.065576	-0.051401		2	12
RP11-228F17	2	156637208	156697439	-0.160708	-0.190673	-0.188219	0.098309	-0.299869	-0.143015	0.384927	0.075174	-0.115937	-0.413405	-0.387873	0.07804	-0.04883	0.064157	-0.008714	0.064248	0.140615	0.005237	-0.048096	-0.259497	-0.028685	-0.241587	0.039439	-0.0821674	0.154634	0.102255	0.086166	0.005	-0.036901	0.176826	-0.131662	0.011194	-0.016431		2	12
RP11-301K6	2	158281996	158449096	-0.140154	0.143927	-0.007805	0.153868	-0.197081	0.016047	0.322765	0.137062	-0.198083	-0.209358	-0.113712	0.122599	-0.102974	0.215701	0.0717	-0.001788	0.051202	0.100104	0.106141	-0.219135	0.049635	-0.024409	-0.018256	0.190385	0.020333	0.073862	-0.029484	0.047481	-0.073139	0.144704	-0.016028	0.305042	0.160316		1	12
RP11-552E1	2	159226087	159418304	-0.411452	-0.27787	-0.372039	-0.078656	-0.410259	-0.210752	0.132987	0.044411	0.044552	-0.540744	-0.476106	-0.063056	-0.270292	-0.096549	0.142848	-0.01616	-0.093198	-0.426351	-0.084823	-0.202614	-0.12783	-0.309025	-0.302931	-0.213843	-0.238381	-0.01303	-0.068458	-0.160322	0.028115	0.061757	-0.16215	0.080522	-0.049537		2	13
RP11-23H14	2	160805538	160973554	-0.412081	-0.457029	-0.168075	0.100025	-0.439241	-0.196009	0.38256	-0.055562	-0.011928	-0.366317	-0.432003	0.072127	0.044369	-0.045524	0.25217	-0.000732	0.076739	-0.066374	-0.136911	-0.195299	-0.083213	-0.11263	-0.070397	-0.387763	0.019182	0.084674	0.016924	-0.023416	-0.06488	0.117823	-0.116823	-0.019857	-0.083518		2	13
RP11-440P12	2	161713725	161885605	-0.304876	-0.671564	-0.290684	-0.12789	-0.547517	-0.186625	0.205058	0.01504	0.192717	-0.400201	-0.289945	-0.034883	0.134841	-0.14339	0.354744	-0.02822	0.012736	-0.40648	-0.013189	-0.257187	0.016149	-0.310639	-0.157407	-0.603318	0.142784	0.025795	-0.022411	-0.030847	0.012674	0.125888	-0.211268	-0.002788	0.082672		2	13
RP11-576I16	2	162800163	162963843	-0.255268	-0.578357	-0.244979	0.126874	-0.372561	-0.087379	-0.130209	0.070058	0.087906	-0.39508	-0.367672	0.0268384	-0.028578	0.146555	0.293021	0.039781	0.082421	-0.2833	0.110269	-0.227737	-0.134424	-0.052477	-0.125134	-0.184888	-0.195579	0.11973	-0.253385	-0.121272	-0.011877	0.223703	-0.13208	0.342847	0.056066		1	12
RP11-5J4	2	164202898	164365195	-0.293916	-0.291189	-0.243678	0.065101	-0.375372	-0.147644	-0.036107	0.024407	-0.010721	-0.346131	-0.442374	0.144299	-0.186827	0.064925	0.221655	0.053323	0.110372	0.037391	-0.078809	-0.230871	-0.109073	-0.065368	-0.071059	-0.006254	-0.091845	0.201316	-0.10512	-0.017681	-0.039885	0.106673	-0.102973	0.300167	0.0516317		1	12
RP11-272E3	2	165355726	165546723	-0.217934	-0.309847	-0.09884	0.184018	-0.57332	-0.144126	0.105413	0.109056	-0.094132	-0.362811	-0.536879	0.186786	-0.027314	0.418775	-0.159321	0.088651	0.272684	-0.0562974	0.045129	-0.304478	-0.178727	0.194834	0.039008	-0.266453	-0.145106	0.22922	-0.070869	0.017444	-0.074305	0.233405	-0.02079	0.32465	-0.108863		1	12
RP11-218M2	2	165889466	165955436	-0.233543	-0.438714	-0.15064	0.0558721	-0.538369	0.012396	0.017523	0.045111	0.088338	-0.393617	-0.398145	0.025402	-0.163579	0.105145	0.030522	0.014074	0.21721	-0.106159	-0.03817	-0.376007	-0.232959	0.035909	-0.047584	-0.389295	-0.257187	0.175931	0.000824	-0.040475	0.041594	0.179198	-0.140721	0.256459	-0.003227		1	12
RP11-2I8	2	166627355	166817420	-0.087339	-0.416864	-0.147713	0.054785	-0.17533	0.039191	-0.14777	0.088996	0.069715	-0.108335	-0.432494	0.016219	-0.017365	0.00319	0.195884	0.057968	0.099234	0.014558	0.058684	-0.143092	-0.081949	-0.05075	-0.058746	-0.221412	-0.200036	0.099994	-0.316883	-0.082357	0.002958	-0.274476	-0.050739	0.294223	0.191776		1	13
RP11-11N16	2	169016879	169207143	-0.12342	-0.641516	-0.294492	0.04027	-0.359127	-0.127715	-0.054545	-0.192733	-0.303116	-0.418316	-0.24756	0.024148	-0.157224	0.064954	0.117066	0.062163	-0.063545	-0.002344	-0.026266	-0.129415	-0.014838	0.079664	-0.122593	0.179383	0.006703	0.029017	-0.085184	0.035528	-0.075001	0.187555	-0.068155	0.462826	0.058121		1	13
RP11-285F23	2	169324017	169514365	-0.297259	-0.572619	-0.280533	0.005483	-0.504881	-0.178295	-0.191943	-0.156747	-0.064673	-0.381073	-0.400104	0.02397	-0.166155	0.138361	0.29255	0.01227	0.042033	-0.228399	-0.025429	-0.242781	-0.189768	0.121557	-0.107888	-0.467622	-0.28546	0.10673	-0.109796	-0.007859	-0.018325	-0.243613	-0.118225	0.39285	0.108845		1	13
RP11-551O2	2	169914098	170054522	-0.265635	-0.541422	-0.18656	-0.02795	-0.39899	-0.080705	-0.190456	-0.117669	0.148608	-0.364393	-0.354877	0.052448	-0.169412	-0.081314	0.295182	-0.000595	0.004772	-0.29994	0.035775	-0.226128	-0.117108	0.083149	-0.160273	-0.093325	-0.179862	0.033271	-0.04352	-0.062019	0.040914	0.099552	-0.219477	0.057283	0.103776		1	13
RP11-141H20	2	169906687	170070826	-0.334467	-0.458494	-0.261281	-0.109195	-0.515023	-0.107454	-0.238156	-0.227903	-0.023487	-0.195631	-0.369333	0.024128	-0.173298	-0.061588	0.314396	-0.033668	-0.017333	-0.119502	-0.095147	-0.247842	-0.111971	0.0371	-0.223091	-0.278136	-0.143819	-0.05502	0.163236	0.024866	-0.034888	-0.007713	-0.200102	0.080143	0.0698554		1	13
RP11-389F18	2	170588347	170807521	-0.168567	-0.423108	-0.310875	-0.047399	-0.478815	-0.261056	-0.170672	-0.043099	-0.047014	-0.431622	-0.353359	0.044387	-0.241978	0.129269	0.24636	0.013362	0.033418	-0.135447	-0.092696	-0.147079	-0.149897	0.149611	-0.046144	0.027095	-0.161931	0.036246	-0.06402	0.060636	-0.057904	0.159052	-0.129135	-0.470248	0.047485		1	14
RP11-244E6	2	171198186	171378406	-0.220188	-0.48175	-0.220176	0.01723	-0.516114	-0.14947	-0.156789	-0.110162	-0.115227	-0.479048	-0.471476	0.0595846	-0.161411	0.141256	0.262035	-0.073546	0.057169	-0.135234	0.026145	-0.289107	-0.130186	-0.029103	-0.106938	-0.253327	-0.174918	0.0975168	-0.0678887	-0.002231	-0.0303797	-0.21636	0.0510212	-0.729571	-0.187947		1	14
RP11-176L20	2	172251845	172388658	-0.207151	-0.00019	-0.005984	0.192698	-0.259675	-0.0024436	0.113467	0.0411	0.049783	-0.242233	-0.278121	0.0418977	0.109969	0.17841	0.515193	0.128667	0.214421	0.093044	0.001029	-0.206614	-0.093597	0.054251	-0.076194	0.236647	-0.043222	0.109681	-0.154179	0.073005	-0.00859	0.298202	0.281406	-0.069964	-0.00915312		2	14
RP11-343H10	2	173286014	173442846	-0.379163	-0.418051	-0.260274	-0.050675	-0.398121	-0.173555	-0.191671	-0.203469	-0.0641	-0.341895	-0.268831	-0.083825	-0.110803	-0.031445	0.295691	-0.05176	-0.136618	-0.115036	-0.123461	-0.110811	-0.080243	-0.20293	-0.080235	-0.46591	-0.157137	-0.019065	-0.044265	0.00669	-0.032019	0.072455	0.306505	-0.298819	0.051381		2	14
RP11-158L8	2	174112569	174292006	-0.243846	-0.16107	-0.191536	0.066374	-0.360571	-0.116621	-0.131428	-0.053945	0.117163	-0.225014	-0.41915	0.074951	-0.001052	0.060714	0.369825	0.076047	0.063957	-0.001036	0.003392	-0.235858	-0.113679	-0.00848	-0.07691	-0.276894	-0.165914	0.054315	-0.182043	-0.022046	-0.068077	-0.147288	0.244382	-0.363735	0.134652		2	14
RP11-483E17	2	175167028	175348690	-0.243789	-0.517711	-0.356728	-0.043829	-0.442207	-0.0859	-0.259511	-0.125197	-0.13856	-0.447097	-0.24659	-0.057142	0.076132	0.05745	0.208598	-0.029061	-0.087066	-0.139831	-0.098313	-0.148587	-0.000897	-0.076434	-0.068305	-0.537689	-0.218039	0.049888	0.013641	0.128461	-0.03466	-0.527478	0.267951	-0.358661	0.044946		2	14
RP11-205B19	2	176095657	176262631	-0.255388	-0.541748	-0.341888	0.019789	-0.387487	-0.189461	-0.18834	-0.12735	0.006304	-0.354796	-0.496553	0.000526	-0.170463	-0.011153	0.274449	-0.023395	-0.032172	-0.147538	-0.125259	-0.203818	-0.105317	-0.0854072	-0.192522	-0.366062	-0.275052	-0.00556	-0.089054	-0.035899	-0.053145	-0.35029	0.091558	-0.392682	-0.041168		2	14
RP11-157E8	2	177169341	177322759	-0.275247	-0.398133	-0.138055	0.061006	-0.467419	-0.099671	-0.181108	0.000595	0.044533	-0.255079	-0.413064	0.047577	-0.039747	0.076069	0.355856	0.012939	0.072493	-0.102562	0.041444	-0.271426	-0.193131	-0.072774	-0.085845	-0.372913	-0.107692	0.102135	-0.064587	-0.111836	-0.045467	0.232857	0.283316	-0.522804	0.002054		2	14
RP11-250N10	2	178197140	178369554	-0.304604	-0.466509	-0.264501	0.020808	-0.539427	-0.096728	-0.257132	-0.063926	0.182769	-0.437335	-0.321976	0.092067	-0.130888	0.003625	0.307359	0.008413	0.095856	-0.224594	-0.001779	-0.227308	-0.170135	-0.096311	-0.085827	-0.47304	-0.192642	0.076186	-0.094268	-0.075965	-0.048251	-0.41608	0.218933	-0.363295	-0.029618		2	14
RP11-65L3	2	179083645	179256472	-0.205298	-0.29836	-0.249887	0.031583	-0.479481	-0.096461	-0.138061	-0.119755	-0.180416	-0.182807	-0.223507	0.016293	0.01259	0.140642	0.258403	-0.023903	-0.028199	-0.1253	-0.053813	-0.175191	-0.07781	-0.052435	0.054099	-0.315077	-0.103709	0.028022	-0.016747	0.016847	-0.074628	-0.271065	0.325223	-0.294206	0.062099		2	14
RP11-535B12	2	180062619	180235223	-0.205985	-0.190947	-0.046111	0.130954	-0.319763	-0.171332	-0.110673	0.015042	0.207831	-0.124536	-0.174749	0.003803	0.04322	0.065334	0.274871	0.08553	0.129246	0.00641	0.110144	-0.164085	-0.149729	-0.044134	-0.016063	-0.249829	-0.033314	0.132505	-0.139295	-0.101757	-0.020628	-0.149137	0.266747	-0.136561	0.22522		2	15
RP11-391P1	2	180448657	180600907	-0.271052	-0.375414	-0.068832	0.185502	-0.531011	0.003486	-0.119794	-0.095039	-0.087614	-0.354759	-0.433319	0.0498196	-0.121111	0.227454	0.301525	0.00225	0.11526	-0.163172	-0.047373	-0.24011	-0.188129	-0.022351	-0.052663	-0.224181	-0.162893	0.105641	-0.212524	-0.018213	0.00324	-0.308653	0.277786	-0.530525	0.0236421		2	15
RP11-67G7	2	182805602	182955815	-0.185266	-0.247298	-0.205865	0.076312	-0.407237	0.030753	0.008023	0.071901	-0.076014	-0.312014	-0.105823	0.209624	-0.092694	0.179855	0.320299	-0.037171	0.171866	0.016249	-0.078323	-0.251767	-0.119079	0.090409	-0.026583	0.289421	-0.048537	0.164701	-0.027298	0.037398	-0.028533	-0.141326	0.220402	-0.164658	0.107147		2	15
RP11-38H6	2	183263206	183429135	-0.230029	-0.208283	-0.085498	0.252345	-0.458143	-0.078038	0.049801	0.042211	0.025259	-0.267054	-0.045128	0.045498	-0.069848	0.161001	0.370337	-0.001289	0.161985	-0.067568	0.119892	-0.293626	-0.243673	0.013372	-0.00169	-0.257342	-0.121289	0.106833	-0.149118	-0.047479	0.026075	-0.208595	0.197799	-0.248736	0.123206		2	15
RP11-571N13	2	184546950	184586499	-0.316178	-0.43041	-0.302819	-0.064711	-0.386709	-0.305203	-0.182372	-0.109478	-0.084942	-0.430535	0.011675	-0.115538	-0.248929	-0.125342	0.161242	-0.109749	-0.146475	-0.096273	-0.057996	-0.166548	-0.117749	-0.149672	-0.066193	-0.3814	-0.19766	-0.053565	-0.095539	-0.102569	-0.001969	-0.334623	0.169241	-0.202068	0.020574		2	15
RP11-363K21	2	185257322	185451829	-0.151878	-0.257033	-0.229033	0.05982	-0.508011	-0.049943	0.038266	0.0836	-0.083451	-0.26721	-0.000606	0.150212	-0.124487	0.094962	0.293893	-0.009293	0.150506	-0.131001	-0.120168	-0.238845	-0.086922	0.106423	-0.095404	-0.317256	0.084985	0.218066	-0.140038	0.01069	-0.107513	-0.204757	0.283598	-0.268013	0.085899		2	15
RP11-29E4	2	185913317	186118506	-0.145369	-0.109012	-0.163932	0.227272	-0.326625	-0.037301	0.097772	0.014018	-0.00249	-0.206104	-0.394702	0.167271	-0.094879	0.144865	0.34792	0.032364	0.277379	0.172892	-0.065548	-0.244428	-0.13842	0.072127	-0.192641	-0.262391	-0.106831	0.182542	-0.081848	-0.045625	-0.036393	-0.231313	0.251656	-0.312812	0.078633		2	15
RP11-372A6	2	187527654	187736577	-0.149246	-0.520464	-0.168265	0.047134	-0.442238	-0.108196	-0.054376	-0.104514	0.064176	-0.390996	-0.294951	0.003641	-0.098655	0.033961	0.361011	-0.002182	0.080737	-0.235366	0.114667	-0.307095	-0.123872	-0.104898	-0.265273	-0.276751	-0.098954	0.065259	-0.092446	-0.050158	0.00861	-0.246041	0.195491	-0.328503	0.150379		2	15
RP11-172N20	2	188973020	189142947	-0.032064	-0.298217	-0.178785	0.105685	-0.498418	-0.142227	-0.080151	-0.150229	-0.17984	-0.451064	-0.270885	0.115761	-0.179165	0.242879	0.249043	0.062467	0.069793	-0.078756	-0.001636	-0.129761	-0.143106	0.060324	-0.227718	-0.243468	-0.185839	0.167578	-0.02152	-0.044007	-0.088101	-0.263605	0.296231	-0.420362	0.067355		2	15
CTC-444N24	2	189908000	189965350	-0.328512	-0.499584	-0.361598	-0.071803	-0.546182	-0.120943	-0.174013	-0.187501	0.200627	-0.340883	-0.353508	0.160049	-0.031754	-0.118694	0.272261	-0.106834	0.025552	-0.302552	-0.071641	-0.126448	0.146106	-0.064984	-0.322072	-0.579003	-0.087762	0.050968	-0.172245	-0.042929	0.030367	-0.338471	0.189112	-0.226995	0.0597539		2	15
RP11-235L22	2	190532681	190693355	-0.121729	-0.176751	-0.152406	0.05598	-0.446145	-0.094975	0.029086	0.00747	-0.040773	-0.268459	-0.355883	0.226598	-0.202861	0.181616	0.312112	0.045536	0.228498	0.013267	-0.04268	-0.202767	-0.043195	0.103892	-0.111159	0.131497	-0.069978	0.16536	-0.0677259	0.098415	-0.042743	-0.177544	0.272857	-0.179278	0.089568		2	15
RP11-284E5	2	191279221	191472235	-0.262674	-0.250306	-0.251441	0.048005	-0.396444	-0.15809	-0.103808	-0.027006	-0.061871	-0.281966	-0.384672	0.12223	-0.022915	0.097462	0.323472	0.003714	0.087207	0.031005	-0.059138	-0.22843	0.00354	-0.069881	-0.307244	-0.38919	-0.10801	0.073103	0.180349	-0.011168	-0.052804	-0.305185	-0.082256	-0.220951	0.237828		1	15
RP11-59L22	2	193032180	193194019	-0.178805	-0.416823	-0.085512	0.117941	-0.365066	-0.21683	0.069615	0.006667	0.049628	-0.155583	-0.414211	0.083602	-0.197089	0.189844	0.342553	0.017998	0.177115	-0.205877	-0.039616	-0.358513	-0.099725	0.0400121	-0.381602	-0.171888	-0.118529	0.101367	-0.00447678	-0.136043	0.067894	0.064067	0.016398	-0.316343	0.132763		1	15
RP11-363G3	2	193887574	194055514	-0.173149	-0.273585	-0.164708	0.106074	-0.376683	-0.151925	-0.044608	-0.041664	-0.037165	-0.243894	-0.237769	0.151311	-0.17094	0.161593	0.265812	-0.05302	0.086324	-0.01832	-0.034517	-0.162921	-0.117572	0.222756	-0.140782	-0.286068	-0.034386	0.063869	0.045791	0.030161	-0.099588	-0.246684	-0.089317	-0.171879	0.125557		1	15
RP11-1A1	2	195347067	195529015	0.126954	-0.169938	-0.035444	0.072726	-0.237489	0.089589	0.075129	0.01687	-0.002849	0.120528	-0.22409	0.044662	-0.012029	0.273424	0.01141	0.069767	0.124742	0.065204	0.293048	-0.165166	-0.104795	0.167756	0.005324	-0.094894	-0.220179	0.11277	0.027358	0.078878	0.018402	-0.100613	-0.020881	-0.052613	0.165603		1	15
RP11-149P12	2	195944174	196113459	-0.159674	-0.363168	-0.106775	0.140449	-0.506919	-0.034826	-0.023524	-0.207043	-0.024834	-0.321096	-0.416674	0.0708697	-0.096029	0.235336	0.315402	0.009288	0.189966	-0.187964	-0.038707	-0.295592	-0.223707	0.211919	-0.244428	-0.292685	-0.191154	0.135491	-0.143333	0.046206	0.026118	-0.26572	-0.132876	-0.384612	0.0419141		1	15
RP11-347P5	2	196655619	196870772	-0.295832	-0.502488	-0.215967	-0.031013	-0.556702	-0.057593	-0.217224	-0.407054	-0.043815	-0.36513	-0.413748	-0.00965771	-0.064296	0.100751	0.328096	-0.051339	-0.021824	-0.218469	-0.08346	-0.295919	-0.127409	0.225961	-0.350285	-0.488718	-0.188375	0.080432	-0.071837	0.070378	0.013134	0.188945	-0.049256	-0.525206	0.168603		1	15
RP11-172B9	2	197900241	197956614	-0.342914	-0.3776	-0.173609	0.079781	-0.423296	-0.182663	-0.189259	-0.276872	0.062708	-0.243301	-0.338657	-0.016489	0.001685	0.077166	0.336059	-0.038412	0.042897	-0.098458	-0.044772	-0.24819	-0.072025	0.125924	-0.430505	-0.39535	-0.057722	0.032124	-0.055407	-0.019563	-0.038531	0.185244	-0.102348	-0.382459	0.111765		1	14
RP11-530J6	2	200107023	200239085	-0.244473	-0.083682	-0.161197	0.066107	-0.550552	0.054815	-0.093968	-0.295299	-0.106709	-0.332607	-0.391756	0.0219491	0.006401	0.242823	0.211736	-0.000999	0.065654	-0.173385	-0.0275	-0.275667	-0.148586	0.250286	-0.181754	0.612952	0.002798	0.091965	0.004408	0.018213	-0.040765	-0.254478	-0.098482	-0.404191	-0.2258		2	14
RP11-23F11	2	200129341	200326333	-0.219625	0.063052	-0.201136	0.036326	-0.587813	-0.059568	-0.129074	-0.203412	-0.15341	-0.40154	-0.214135	0.061205	-0.148492	0.17769	0.143069	0.090427	-0.015073	-0.063198	-0.048941	-0.171869	-0.089171	0.319676	-0.221486	0.658612	0.066991	0.099924	0.13782	0.091243	0.04195	-0.33736	-0.045239	-0.446906	-0.186155		2	14
RP11-34K3	2	200825645	201002183	-0.442658	-0.62283	-0.254714	-0.070304	-0.551363	-0.118587	-0.311944	-0.414798	0.026301	-0.335738	-0.324292	-0.14582	-0.115467	0.025258	0.341997	0.008845	-0.08513	-0.252679	0.035999	-0.147408	-0.173611	-0.042034	-0.334431	0.634813	-0.062786	-0.013963	0.025443	-0.061295	0.04236	0.093212	-0.122358	-0.560369	-0.058944		2	14
RP11-13J8	2	201673326	201846513	-0.354571	-0.594399	-0.106753	0.023658	-0.389586	-0.060032	-0.11319	-0.252365	0.045541	-0.286038	-0.256884	-0.023156	0.351503	0.085141	0.315587	-0.014961	0.015702	-0.075109	0.025641	-0.187218	0.019021	0.163099	-0.22875	0.857585	0.029105	0.038869	-0.058922	0.139322	-0.039317	0.205339	-0.023996	-0.413187	0.148002		3	14
RP11-309N8	2	202317540	202455809	-0.375621	-0.800536	-0.312336	-0.118411	-0.472887	-0.239714	-0.231462	-0.185898	0.126813	-0.43264	-0.401761	0.001469	-0.067009	-0.053967	0.26265	-0.006857	0.049557	-0.18501	-0.023609	-0.258509	-0.059282	0.017704	-0.343296	-0.0824703	-0.039269	0.107698	0.051528	-0.034958	-0.010898	0.06858	-0.116398	-0.499294	0.021541		2	14
RP11-329O10	2	203482868	203499614	-0.166859	-0.258098	-0.04089	0.091436	-0.329681	-0.051138	-0.014782	0.054759	0.080216	-0.166113	-0.3285	0.079532	-0.078072	0.183171	0.478394	0.010758	0.220849	-0.069937	0.091876	-0.241968	-0.193547	0.207136	-0.159816	0.522217	0.09766	0.180881	0.159065	0.072826	-0.009738	-0.139275	0.03698	-0.295182	0.160657		2	14
RP11-507C18	2	204832492	205032445	-0.262478	-0.437621	-0.277348	0.024864	-0.513079	-0.114253	-0.158046	-0.097051	0.161098	-0.317012	-0.395213	0.0245799	-0.063477	-0.030675	0.324108	0.008842	0.032779	-0.150912	-0.017967	-0.224343	-0.225784	-0.153709	-0.146616	-0.024307	-0.098484	0.0755729	-0.0759058	-0.049387	-0.0359565	-0.113901	0.0723962	-0.442673	0.077098		1	14
RP11-15J24	2	205292081	205464556	-0.070448	-0.464988	-0.286511	-0.138691	-0.173601	-0.127799	-0.038649	0.235542	-0.065464	-0.409977	-0.504955	-0.049803	-0.183166	0.074999	0.200901	-0.015897	0.105775	-0.159081	-0.032561	-0.114899	-0.069455	0.019948	0.075154	0.257481	-0.157624	0.066388	-0.030742	-0.037466	0.017709	0.146875	-0.191944	-0.526361	0.09049		1	15
RP11-325M10	2	206171619	206359680	-0.215667	-0.792631	-0.218874	-0.016593	-0.431229	-0.079391	-0.288253	-0.355794	-0.068382	-0.366836	-0.320684	-0.000803857	-0.094983	0.090403	0.222566	0.043368	-0.057745	-0.280227	0.003593	-0.223923	-0.168209	0.0162997	-0.318369	-0.0316553	-0.123888	-0.001567	0.134432	0.012307	0.002411	0.054548	-0.0328	-0.468393	-0.049814		1	15
RP11-470J24	2	206964219	207113680	-0.322713	-0.770257	-0.197906	-0.09077	-0.450413	-0.204153	-0.182585	0.006873	0.086184	-0.321465	-0.357985	-0.061249	-0.124514	0.076337	0.398308	0.00121	0.07248	-0.195136	-0.012319	-0.273014	-0.145284	-0.03932	-0.344486	-0.026791	0.027614	0.082005	-0.070865	-0.044201	-0.074155	0.184462	-0.140036	-0.421042	0.011972		1	15
RP11-140C4	2	208832298	208995786	-0.078266	0.044489	-0.121566	0.030159	-0.047961	-0.042119	-0.06624	-0.055012	-0.349746	-0.230516	-0.146587	-0.0033	-0.048589	0.109915	0.084351	0.013957	-0.103345	0.140309	0.107116	-0.119047	0.081967	-0.036823	-0.032116	0.173045	-0.216493	-0.041995	0.045341	-0.006884	-0.027286	-0.033161	-0.076315	0.228857	0.014769		1	15
RP11-479L11	2	210068962	210267450	-0.256604	-0.665405	-0.218126	0.040445	-0.449869	-0.231743	-0.073939	-0.034523	0.0325789	-0.453939	-0.446196	0.098924	-0.147951	0.03804	0.320209	0.001492	0.141171	-0.057815	-0.10502	-0.186449	-0.00316	-0.048756	-0.210168	-0.488991	0.138311	0.12813	0.019087	-0.005347	0.003611	-0.419196	-0.244687	-0.418304	0.007024		1	16
RP11-92L12	2	210284909	210448993	-0.176965	-0.460894	-0.149008	0.095015	-0.379169	-0.114243	0.055498	-0.080526	0.126375	-0.172291	-0.36632	0.031804	-0.165619	0.258259	0.267105	0.069338	0.176618	0.03871	0.012897	-0.283626	-0.036506	0.072968	-0.174498	-0.177042	-0.058809	0.177433	0.001142	-0.066195	-0.074636	-0.19551	-0.201139	-0.376689	-0.008326		1	16
RP11-396J8	2	210745171	210937274	-0.210082	-0.596098	-0.144386	0.139143	-0.468644	-0.033845	0.107627	-0.185625	0.021303	-0.328946	-0.449978	0.162463	-0.118815	0.231372	0.388137	0.052849	0.181338	-0.01492	-0.059793	-0.297755	-0.22466	0.059942	-0.046954	-0.301534	0.085869	0.168541	-0.00529	-0.016391	-0.0152	-0.248148	-0.248628	-0.551394	0.122141		2	16
RP11-300D24	2	211988771	212156835	-0.272166	-0.680151	-0.319233	-0.02835	-0.485959	-0.081204	-0.08215	-0.229273	-0.180336	-0.459866	-0.296241	0.058142	-0.270655	0.063175	0.13714	-0.100132	-0.045014	-0.074595	-0.085363	-0.213642	-0.07181	0.002835	-0.123373	0.456795	0.068561	0.075653	0.062281	0.001398	-0.053541	-0.219505	-0.189427	-0.278216	-0.100789		2	16
RP11-560C24	2	213278234	213464451	-0.314106	-1.27995	-0.233077	0.020665	-0.524807	-0.240016	-0.163155	-0.279772	0.084694	-0.390321	-0.50937	0.005772	-0.195879	0.039539	0.307183	-0.002524	0.065375	-0.213675	-0.086011	-0.296547	-0.216914	-0.065991	-0.36398	0.809199	0.043086	0.156952	-0.174819	-0.190887	-0.07238	-0.352514	-0.325468	-0.5159	-0.013122		2	16
RP11-105N14	2	213830414	213991444	-0.004944	-0.09581	-0.034279	0.047113	0.098041	-0.142272	-0.052878	-0.170767	-0.01275	-0.194503	0.019783	0.047504	-0.044639	0.039992	0.253042	-0.09956	-0.062469	0.012928	0.055436	-0.044098	-0.007926	-0.026981	0.011147	0.225503	-0.124811	0.010522	-0.105262	-0.024774	-0.067694	-0.169802	-0.02758	0.281025	0.025395		2	17
RP11-427F22	2	214823539	215024677	-0.217455	-0.761022	-0.228872	0.044676	-0.374127	-0.266698	-0.146866	-0.195606	-0.024982	-0.296214	-0.352981	0.113933	-0.265614	0.044	0.358922	0.061317	0.03995	-0.092439	-0.074653	-0.142017	-0.051252	-0.094872	-0.296656	-0.436779	-0.190223	0.024356	0.075082	-0.072629	0.038085	-0.33106	-0.264027	-0.453608	0.057021		1	18
RP11-489P15	2	216388090	216519816	-0.169771	-1.17908	-0.174617	0.014275	-0.43581	-0.091636	-0.285314	-0.486303	-0.159695	-0.474194	-0.253135	0.153386	0.183647	0.113487	0.318533	0.07977	-0.03255	-0.143233	0.057828	-0.211246	-0.125177	-0.052254	-0.316631	-0.39468	-0.301698	0.043944	0.224288	0.057813	0.05445	-0.407501	-0.104707	-0.635371	-0.035275		1	18
RP11-307A11	2	217179278	217341485	-0.458594	-0.307082	-0.365774	-0.111554	-0.576819	-0.146229	-0.383747	-0.475024	-0.007912	-0.33825	-0.500733	-0.09822	-0.079963	-0.109633	0.338969	0.018057	-0.074873	-0.222563	-0.109671	-0.268082	-0.143556	-0.257084	-0.427299	-0.587503	-0.36956	-0.028112	0.251852	-0.038148	0.028338	-0.523323	-0.276505	-0.555779	0.017219		1	19
RP11-506C8	2	217341286	217521144	-0.425138	-0.626463	-0.336387	-0.147981	-0.652849	0.0289312	-0.384137	-0.606107	-0.133292	-0.258385	-0.417323	-0.155421	-0.084771	-0.048383	0.314059	-0.031394	-0.22225	-0.165056	-0.057515	-0.201172	-0.199886	-0.230843	-0.28154	-0.523183	-0.407022	-0.065551	0.133201	-0.023512	0.041076	-0.559015	-0.253919	-0.499623	0.034847		1	19
RP11-423F9	2	217914888	218127436	-0.338624	0.048905	-0.325946	-0.103075	-0.527134	-0.14154	-0.259778	-0.40271	-0.130896	-0.377056	-0.363359	-0.011189	-0.082149	0.020036	0.228605	0.016046	-0.090424	-0.071962	-0.090237	-0.218144	-0.111858	-0.134924	0.09581	-0.495059	-0.323586	0.018329	0.177438	-0.029843	-0.03419	-0.463275	-0.220057	-0.488492	-0.143642		1	18
RP11-378A13	2	218944354	219136108	-0.561276	0.210519	-0.287543	-0.092961	-0.436873	0.121299	-0.315761	-0.48149	0.230827	0.046432	-0.278868	-0.140433	0.383358	-0.173097	0.305115	-0.090109	-0.276977	-0.020993	0.004812	-0.155775	-0.043959	-0.266323	0.004297	-0.440903	-0.213402	-0.136343	0.038344	0.108264	-0.01226	-0.412211	-0.183817	0.085596	-0.334845		1	18
RP11-512O7	2	220354172	220549129	-0.385276	-0.526243	-0.305303	0.011589	-0.480219	0.001877	-0.296896	-0.418438	0.071169	-0.265018	-0.343885	-0.18573	-0.082536	-0.060929	0.328545	-0.016464	-0.112251	-0.220798	-0.016425	-0.29584	-0.182354	-0.240801	-0.036026	-0.535473	-0.346474	0.02068	-0.040074	-0.111105	0.039836	-0.460998	-0.326617	-0.35082	0.147585		1	18
RP11-444B5	2	221452429	221539325	-0.357723	-0.414262	-0.277912	0.006233	-0.528578	-0.248253	-0.215546	-0.324612	-0.001936	-0.34936	-0.430494	0.08826	-0.122053	0.08686	0.405618	0.014392	-0.001752	-0.107815	-0.129489	-0.249496	-0.121667	-0.067726	0.392434	-0.462828	-0.133061	-0.007558	-0.064647	-0.068615	-0.04392	-0.226953	-0.280709	-0.324893	0.003515		1	18
RP11-71J24	2	222610551	222791520	-0.246774	0.04441	-0.235692	-0.009041	-0.502173	-0.164027	-0.173558	-0.286236	0.000422	-0.434496	-0.418148	-0.129162	-0.19168	0.051011	0.273725	0.042907	0.051933	-0.14398	-0.000462	-0.250284	-0.147791	0.0178267	0.048609	-0.0907805	-0.264624	0.096276	0.02273	-0.081509	-0.050312	-0.447491	-0.275242	-0.459912	-0.157318		1	18
RP11-397D2	2	222972564	223129900	-0.258494	-0.247117	-0.176799	0.050313	-0.497131	-0.117045	-0.061916	-0.195202	-0.036092	-0.275855	-0.351422	0.01785	0.056998	0.145566	0.272353	0.041117	0.089538	-0.119256	0.00545	-0.235135	-0.150057	0.004822	0.117832	-0.187456	-0.230934	0.131804	0.059221	0.057343	-0.013518	-0.315608	-0.201935	-0.36033	0.0663607		1	18
RP11-3I22	2	223297497	223466803	-0.319243	-1.20391	-0.20595	0.070876	-0.325234	-0.278462	-0.213791	-0.280243	0.000129	-0.357497	-0.403215	-0.096142	0.007248	-0.013785	0.396754	0.052937	0.061909	0.00031	-0.108479	-0.207045	-0.0594	-0.092114	0.0667	-0.52165	0.102596	0.080487	0.048259	0.030814	0.031757	-0.391219	-0.268212	-0.505244	-0.081059		1	17
RP11-551D18	2	224135318	224264870	-0.28996	-0.771547	-0.175402	0.004316	-0.638974	-0.149428	-0.110271	-0.308132	-0.056862	-0.340223	-0.377588	0.223493	-0.03393	0.168333	0.267542	0.028141	0.026588	-0.219478	0.065291	-0.230933	-0.185706	-0.050291	0.395068	-0.437553	7.3e-05	0.084455	0.008135	0.058683	-0.054217	-0.314294	-0.25401	-0.566811	-0.097442		1	17
RP11-516C4	2	225673416	225857094	-0.243535	-0.516866	-0.213402	0.0285982	-0.579494	-0.154954	-0.053243	-0.304968	-0.015925	-0.386127	-0.926488	0.083466	0.00229	0.031284	0.403942	0.055594	0.014783	-0.140202	-0.01936	-0.247645	-0.158686	-0.0160836	0.273796	-0.163658	0.005296	0.007313	-0.084963	-0.056394	-0.008512	-0.34318	-0.270742	-0.325352	-0.0449879		1	17
RP11-211K17	2	227157066	227322490	-0.25031	-1.31971	-0.295629	-0.026468	-0.637019	-0.221685	-0.23402	-0.394621	-0.119437	-0.509593	-0.935445	-0.140899	-0.156636	-0.041241	-0.091592	-0.022743	-0.082194	-0.167795	-0.132592	-0.214378	-0.117778	-0.251511	-0.31623	-0.533166	-0.021752	-0.010885	0.074693	-0.017169	0.066739	-0.454889	-0.258168	-0.524822	-0.148244		0	18
RP11-149O3	2	228483956	228659300	0.067308	-0.202907	-0.134362	0.11231	-0.364745	0.0770205	-0.137346	-0.308443	-0.137024	-0.297832	-0.50685	-0.082272	-0.003803	0.188388	-0.488796	0.018374	0.015916	-0.133623	0.239328	-0.21142	-0.160883	0.004103	-0.131203	-0.010643	0.092973	0.062682	0.195145	0.047246	-0.027626	-0.159115	-0.080307	-0.135377	0.083356		0	19
RP11-70L16	2	229433843	229554221	-0.229033	-1.13192	-0.212492	-0.048891	-0.605824	-0.142706	-0.269217	-0.410438	-0.017913	-0.501552	-0.753513	-0.20047	-0.219875	0.142563	-0.653042	0.021274	0.000187	-0.225928	-0.386006	-0.194247	-0.187126	-0.088461	-0.336114	-0.428748	-0.016186	0.058279	-0.159421	-0.034144	-0.035159	-0.353308	-0.24289	-0.484141	-0.002901		0	20	6.86091	2q
RP11-457P23	2	230504217	230706599	-0.087339	-0.60549	-0.153028	-0.079227	-0.474098	-0.029394	-0.087204	-0.252679	-0.058912	-0.230525	-0.183163	-0.190154	-0.04561	0.073027	-0.323343	0.030665	-0.073148	-0.065414	-0.080126	-0.132942	-0.019983	-0.110729	-0.163265	-0.248772	0.065634	-0.047488	0.062427	0.06705	-0.0682062	-0.250098	-0.069623	-0.114345	0.074806		0	20
RP11-52C8	2	232485851	232659089	-0.217915	-0.765763	-0.38275	-0.23181	-0.533531	-0.049831	-0.221102	-0.287443	0.070008	-0.245233	-0.471127	-0.266267	-0.032957	-0.080823	-0.490355	-0.073638	-0.108518	-0.026267	-0.30475	-0.128803	-0.019709	-0.224728	-0.1813	-0.323216	-0.001263	-0.039427	0.123867	0.156681	-0.120849	-0.386068	-0.104634	-0.045277	0.045815		0	20
RP11-91N19	2	233104541	233261053	-0.081897	-1.45962	-0.228326	-0.155677	-0.449194	-0.131978	-0.344832	-0.634174	-0.417962	-0.556794	-0.546645	-0.355245	-0.266816	0.003054	-0.368545	-0.065145	-0.359803	-0.388426	-0.48031	-0.122975	-0.110792	-0.451126	-0.420505	-0.323585	-0.228015	-0.196152	-0.21376	-0.144036	-0.166026	-0.595526	-0.278094	-0.358746	0.522633		0	20
RP11-534J17	2	234054852	234218410	-0.358957	-1.32493	-0.329346	-0.104313	-0.546911	-0.220264	-0.300195	-0.424304	0.181158	-0.353051	-0.951845	-0.338369	-0.034182	-0.124387	-0.398922	0.018783	0.014687	-0.167643	-0.499344	-0.168676	-0.135831	-0.377833	-0.421073	-0.462931	-0.102787	0.038429	0.183459	-0.055149	0.066912	-0.466962	-0.264094	-0.502262	0.213915		0	20
RP11-263G22	2	234710316	234819026	-0.243342	-0.737679	-0.222694	-0.02276	-0.272476	-0.089958	-0.120727	-0.853743	-0.093804	-0.289056	-0.709612	0.024349	-0.127406	0.062035	-0.72589	0.014076	-0.040794	-0.128163	-0.392592	-0.191052	-0.137613	-0.366325	-0.264088	-0.323951	-0.111767	0.094069	-0.037322	0.020147	0.034279	-0.153234	-0.075162	-0.249659	-0.026486		0	20
RP11-84G18	2	236104371	236294755	-0.50577	-1.19951	-0.200275	-0.427627	-0.711089	-0.241786	-0.498578	-1.14052	-0.077909	-0.467944	-0.972575	-0.475842	-0.212462	-0.261305	-0.76719	-0.110784	-0.298241	-0.343934	-0.623244	-0.203485	-0.157894	-0.640275	-0.519816	-0.736755	-0.163751	-0.136292	0.185038	-0.080028	-0.003109	-0.633824	-0.388006	-0.396863	-0.01393		0	20
RP11-260J21	2	237157331	237338113	-0.074213	-0.67928	0.021609	-0.23444	-0.222044	0.031334	-0.133587	-0.562794	-0.198973	-0.218382	-0.674606	-0.277204	-0.041251	0.108463	-0.410818	-0.139225	-0.172424	-0.073824	-0.066342	-0.03229	0.004862	-0.249665	-0.249602	-0.35663	-0.025731	-0.053111	0.058738	0.020835	0.084201	-0.288918	-0.188033	0.136215	-0.106921		0	19
RP11-497D24	2	238368923	238581197	-0.285002	-1.105	0.014247	-0.038417	-0.56101	-0.135827	-0.233923	-0.877693	0.016863	-0.457606	-0.640014	-0.359746	-0.006919	-0.075802	-0.649499	-0.005304	-0.108448	-0.143299	-0.349776	-0.094118	-0.077651	-0.317953	-0.244631	-0.060872	-0.148388	0.021268	0.464246	-0.040945	-0.001726	-0.579275	-0.169188	-0.478083	-0.034904		0	18
RP11-15L18	2	239039974	239208490	-0.382144	-1.30686	0.026986	-0.185221	-0.611943	-0.156953	-0.39755	-0.948072	0.139344	-0.326056	-0.841746	-0.36431	-0.003474	-0.223591	-0.461913	-0.038838	-0.178712	-0.386569	-0.443179	-0.188417	-0.178334	-0.50157	-0.465629	-0.181927	-0.115062	-0.090554	0.226163	-0.144205	0.050236	-0.497769	-0.196042	-0.310221	0.153776		0	18
RP11-546M8	2	240069142	240213761	-0.417955	-1.0423	-0.009284	-0.039017	-0.590351	0.098566	-0.187859	-0.868803	-0.045692	-0.485169	-0.691693	-0.286119	0.267923	-0.127955	-0.481385	-0.054779	-0.090041	0.005084	-0.467349	-0.04669	-0.042504	-0.359462	-0.205386	-0.032226	-0.018551	0.041286	0.405355	-0.034858	0.04743	-0.379805	-0.177656	-0.23867	0.082208		0	17
RP11-556H17	2	241691439	241866617	-0.469653	-1.20483	-0.033245	-0.088184	-0.706561	-0.024198	-0.284494	-0.899271	0.123741	-0.667951	-0.878834	-0.248269	0.202216	-0.090975	-0.573925	0.020768	-0.028731	-0.093299	-0.414891	-0.176564	-0.086948	-0.385769	-0.307188	-0.051436	-0.061388	0.086299	0.167245	-0.259251	0.079706	-0.359731	-0.248573	-0.379952	0.056902		0	17
GS1-172I13	2	242518229	242618229	0.083955	-0.305197	-0.566565	-0.372816	0.009897	0.05322	-0.298211	-0.04287	-0.414578	0.152368	0.024762	-0.20526	-0.140349	0.227402	-0.310044	-0.204982	-0.329001	-0.247917	0.107758	-0.210912	0.012778	0.045891	-0.118274	-0.275006	-0.449006	-0.129771	-0.018948	-0.082755	-0.005232	0.034103	-0.024894	0.059204	-0.0494177		1	7
RP11-86C13	3	768338	958276	0.397417	-0.4852	-0.346112	0.041931	-0.123909	0.054397	0.369913	-0.329079	-0.58363	-0.197648	-0.165186	0.227546	0.023394	-0.002942	-0.076564	0.051929	-0.099685	0.226631	0.418706	0.374533	-0.022545	0.551194	0.194099	-0.004007	-1.07161	0.068963	0.011563	-0.222739	0.002331	0.11116	-0.078886	-0.066839	-0.201556		6	4
RP11-299N3	3	2181272	2367278	0.48297	-0.057545	0.326061	0.275126	-0.128716	0.100622	0.590593	-0.209713	-0.499341	-0.045866	-0.251385	0.254442	-0.016366	0.289578	-0.068415	0.033436	0.150766	0.381856	0.209071	0.432797	0.084479	0.617752	0.207375	0.03867	-0.552033	0.193978	-0.052675	-0.059838	-0.056458	0.351609	0.046624	-0.234592	-0.121666		8	3
RP11-97C16	3	3100219	3274531	0.1407	-0.33561	-0.102797	0.100354	-0.205688	0.323417	0.036224	-0.2027	-0.228665	-0.072701	-0.109844	0.042344	0.099998	0.274136	0.022414	0.087969	-0.040204	0.046976	0.458712	0.170241	0.000293	0.190481	0.082152	-0.358204	-0.396	0.025445	-0.043934	-0.014813	-0.010594	0.165678	-0.019934	-0.411068	0.140074		7	3
RP11-95E11	3	3134172	3304965	0.036326	-0.030174	-0.200749	-0.117182	-0.209632	0.312578	0.189819	-0.144745	-0.395551	-0.078837	-0.117031	0.01074	-0.240517	0.145221	0.0099328	-0.231039	-0.143408	0.173828	-0.069037	0.131844	0.041186	0.079746	0.08284	0.194749	-0.435475	-0.001502	-0.029566	0.015671	-0.027268	0.009591	0.045926	-0.077124	-0.136297		7	5
RP11-10H6	3	3156042	3326580	0.326612	-0.089267	-0.310846	0.118018	-0.10966	-0.090442	0.425491	-0.341783	-0.620947	-0.182126	-0.525024	0.10785	-0.321019	-0.006212	0.019063	0.082741	-0.088348	0.244827	-0.113592	0.480898	-0.00966	0.381092	-0.010449	-0.087274	-0.520237	0.074618	-0.078883	-0.097818	-0.059344	0.04343	0.09195	-0.300333	-0.0607276		7	5
RP11-183N22	3	4492889	4493650	0.658851	0.220126	-0.128185	0.443747	0.017793	0.00515011	0.0744776	-0.043595	-0.50941	-0.217407	-0.441689	0.0263608	0.243954	0.113633	0.029246	0.075357	0.098531	0.216762	0.179932	0.468203	-0.044954	0.47431	0.084423	0.089962	-0.524604	0.199721	-0.193956	-0.044733	0.064342	0.306043	-0.092927	-2.90934	-0.309852		7	6
RP11-238A9	3	4490452	4652964	0.369226	0.082452	-0.406787	0.082492	-0.099449	-0.074865	0.153195	-0.228678	-0.567058	-0.228299	-0.376998	0.045274	0.096035	0.004207	-0.027888	-0.008338	-0.113183	0.347266	-0.006017	0.518746	0.005096	0.351972	0.059053	-0.104847	-0.510322	0.014927	0.118674	0.012149	-0.037496	0.013827	-0.072741	-2.17071	-0.334218		7	6
RP11-129J10	3	5027803	5180954	0.200348	0.092003	-0.197285	0.017464	-0.084554	0.020592	-0.000836	-0.1719	-0.459217	0.063773	-0.227249	-0.134512	0.367826	0.00595	0.048531	-0.041409	-0.249655	0.093814	0.163101	0.198459	0.052593	0.713719	-0.004095	-0.138928	-0.467974	-0.05689	-0.290623	0.055064	0.029622	0.166618	-0.059933	-1.47198	0.02396		7	6
RP11-33E18	3	5501957	5696842	0.301012	0.004513	-0.095949	0.233272	-0.030682	-0.035391	0.120067	-0.074126	-0.407014	-0.224359	-0.365153	0.145366	-0.191645	-0.053237	0.030964	0.0007	-0.0381	0.172827	-0.013362	0.249735	-0.023982	0.347607	-0.021858	-0.0345627	-0.389976	0.032927	-0.056952	-0.064091	-0.08644	0.124527	-0.127218	-0.749747	-0.430785		7	5
RP11-277D17	3	6475245	6636733	0.311725	0.024425	-0.107329	0.080986	-0.154425	-0.050254	0.102092	-0.074226	-0.29391	-0.262887	-0.431312	0.028056	-0.034274	-0.021951	-0.040332	0.009597	0.020479	-0.033297	0.094122	0.222197	-0.084269	0.951291	0.025132	-0.102282	-0.228916	0.035502	-0.0393134	-0.157464	-0.056225	0.200905	-0.043381	-2.32068	-0.210632		7	5
RP11-167K17	3	6749027	6942291	0.376481	0.281581	-0.1194	0.148396	-0.026261	-0.036756	0.250703	-0.146647	-0.558255	-0.108545	-0.350627	0.090655	-0.088389	0.062529	0.048239	-0.01201	0.000685	0.272155	-0.030957	0.241141	-0.043491	0.966698	0.105321	0.0643484	-0.168511	0.045691	-0.0697279	-0.072515	-0.04852	0.135348	0.037872	0.128103	-0.275088		7	4
CTB-114A6	3	7498176	7537606	0.268599	-0.173726	1.13133	0.184161	-0.287062	0.196611	0.018022	-0.335814	-0.139132	-0.261126	-0.182273	0.131988	0.040822	0.012746	0.052511	0.115871	-0.032996	0.143229	0.117581	-0.020132	0.070081	0.118171	-0.071098	-0.328812	0.367879	-0.012811	-0.155893	-0.042063	0.029494	-0.055529	0.051912	0.237122	-0.075411		7	4
RP11-329A2	3	7560405	7760383	0.39175	0.276362	0.03485	0.293913	-0.0085385	0.137588	0.240382	0.052281	-0.332813	-0.0571161	-0.220868	0.303898	-0.049411	0.161098	0.206574	0.070858	0.097863	0.172712	0.139222	0.148019	0.007842	0.913211	0.141644	0.166015	-0.093493	0.136882	-0.097647	-0.043831	-0.022607	0.276472	0.205607	-1.25387	-0.116204		7	4
RP11-105K13	3	8869825	9037105	0.413936	0.314673	0.042438	0.327775	0.016711	0.07283	0.317505	0.135581	-0.232443	0.016122	-0.203197	0.254746	-0.182822	0.189443	0.070595	-0.027953	0.12453	0.189306	0.088703	0.235486	0.014786	0.600142	0.120265	0.134825	-0.235763	0.050409	-0.128272	-0.012811	-0.140441	0.07402	0.072994	-0.042616	-0.0947099		7	4
RP11-334L22	3	9053943	9236203	0.195675	-0.085942	-0.196143	0.055445	-0.011484	-0.049459	-0.038165	-0.498365	-0.421265	0.007084	-0.365476	-0.095484	-0.004652	-0.358586	0.041096	-0.034858	-0.287226	0.11519	-0.00847	0.494959	0.068306	0.572676	-0.055994	-0.282075	-0.511918	-0.165333	-0.068866	-0.070512	0.007691	0.098346	0.007558	0.116881	-0.154137		7	5
RP11-382A21	3	10066555	10067156	0.265888	0.159962	-0.13496	-0.036357	-0.076995	0.067096	0.043395	-0.416685	-0.519282	-0.039985	-0.260225	-0.061338	0.242261	-0.124361	-0.004618	-0.060463	-0.219716	0.344667	0.067046	0.525072	0.169515	0.714561	0.062957	-0.035063	-0.38536	-0.072215	-0.00811	0.178249	0.032528	0.087795	0.227571	0.265027	-0.254851		7	5
RP11-438J1	3	10137483	10347535	0.243423	-0.111848	-0.116237	0.006555	-0.165576	0.100289	0.03018	-0.490804	-0.409224	-0.105908	-0.497613	0.008667	0.247178	-0.106552	0.019424	-0.001512	-0.137515	0.095756	-0.002948	0.261433	0.063614	0.721856	-0.043794	-0.147322	-0.445059	-0.009005	-0.023942	0.054857	-0.062578	0.036393	0.215606	-0.154837	-0.274728		7	5
RP11-25C10	3	12420266	12590814	0.297144	-0.153858	-0.152961	-0.017729	-0.113915	0.164053	0.130001	0.078028	-0.528675	-0.085563	-0.151167	-0.068285	0.226112	-0.024887	-0.117759	0.03665	-0.215168	0.203052	0.058513	0.497166	0.086514	0.723103	0.089885	0.031172	-0.442705	-0.069785	0.052585	0.186852	-0.057362	0.172138	0.145105	0.936235	-0.084795		8	5
RP11-163D23	3	12590779	12735990	0.363899	0.182325	-0.034236	0.160849	0.04889	-0.062032	0.240146	0.287641	-0.421533	-0.03212	-0.354966	0.067853	0.374594	-0.015035	0.027589	0.054404	0.058694	0.334609	0.03489	0.491342	0.077516	0.901854	0.007273	-0.023325	-0.443271	0.057809	-0.180772	0.10679	-0.075413	0.182714	0.116946	0.76359	-0.059827		8	5
RP11-488M6	3	13474877	13656208	0.174963	-0.436205	-0.126328	-0.042327	-0.180859	0.048558	-0.166069	-0.07208	-0.367677	0.123381	-0.123992	-0.106899	0.360333	-0.256999	0.011261	-0.021929	-0.276191	-0.098591	0.312158	0.562668	-0.048752	0.748796	-0.047744	-0.176347	-0.485274	-0.205793	-0.124312	-0.123501	-0.010058	0.065886	0.14174	1.10085	-0.299459		8	5
RP11-165B2	3	13797747	13964637	0.10698	-0.320722	-0.266261	-0.101125	-0.149954	0.261438	-0.087132	0.039055	-0.338952	0.202347	-0.268527	0.056828	0.006445	-0.305324	0.016014	-0.143736	-0.230937	0.145353	0.028667	0.463473	0.019392	0.632571	-0.125269	-0.173883	-0.338753	-0.164858	0.004264	-0.019563	0.017938	0.027583	-0.066758	0.948559	-0.101366		8	5
RP11-316A10	3	14886274	15046975	0.197756	-0.351261	-0.34349	0.022142	-0.097193	0.026362	0.013904	0.126971	-0.310714	0.005621	-0.198741	0.111807	0.237091	-0.159935	-0.083054	0.007702	-0.115897	0.161032	0.129014	0.381376	0.042813	0.607696	-0.115342	-0.266997	-0.21964	-0.04794	-0.047707	-0.043003	-0.028422	-0.037503	0.230951	0.720109	-0.273119		8	5
RP11-305L22	3	15628045	15764879	0.42468	-0.167594	-0.153654	0.135566	-0.15815	0.043367	0.104297	0.204415	-0.545827	0.028425	-0.26718	-0.008086	0.217975	0.103504	0.016528	-0.019621	-0.136719	-0.011801	0.169006	0.407846	0.051021	0.851562	0.160839	-0.083827	-0.410651	0.022784	-0.248553	0.06794	-0.071666	0.280645	0.22362	0.643575	-0.103151		8	5
RP11-255O19	3	15780358	15940642	0.489143	-0.180343	-0.163851	0.247616	0.012752	-0.063708	0.33954	0.387116	-0.490837	0.00486	-0.337011	0.178748	0.158559	0.13247	-0.03245	0.078471	0.034059	0.360969	0.091425	0.459644	0.061176	0.942416	0.054694	0.073558	-0.368003	0.149423	-0.182112	-0.033534	-0.033288	0.207595	0.170571	0.869015	0.023184		8	5
RP11-80D24	3	17181366	17345270	0.528897	0.163066	-0.146313	0.345094	-0.015796	-0.015091	0.310302	-0.252347	-0.514224	-0.130407	-0.469125	0.174692	-0.031324	0.110027	-0.030161	0.111262	0.108405	0.330371	0.028112	0.444492	0.04283	0.92496	0.135556	0.0839986	-0.391408	0.148595	-0.085003	0.044061	-0.116059	0.191519	0.194147	0.173261	-0.11662		8	6
RP11-8D23	3	17809290	17960793	0.271514	-0.11174	-0.234553	0.031586	-0.093754	0.141195	0.033974	-0.338804	-0.466149	-0.231916	-0.317984	0.139518	0.072928	0.134771	-0.037305	-0.007167	-0.145777	-0.021644	0.286129	0.306985	0.05762	0.509989	0.130292	-0.114967	-0.188042	0.033744	-0.062873	0.09531	-0.028127	0.08924	0.130054	0.615725	-0.124851		8	6
RP11-44M22	3	19336535	19494336	0.589716	0.197724	-0.121821	0.285003	0.003147	-0.0225975	0.344847	-0.077329	-0.356438	-0.185177	-0.374895	0.362838	-0.066577	0.141545	0.104083	-0.022085	0.206896	0.209651	0.021527	0.24899	-0.010035	0.856935	0.042591	0.129784	-0.385326	0.220455	-0.210038	-0.145958	-0.019745	0.333218	0.087743	0.698219	-0.085664		8	6
RP11-27J5	3	20636015	20828584	0.441935	-0.01453	-0.157278	0.201666	-0.084219	-0.070576	0.265936	-0.15465	-0.176155	-0.291839	-0.420129	0.109482	-0.094006	0.128227	0.056168	0.079221	0.10394	0.096726	0.036263	0.319646	-0.06469	0.672825	0.068599	0.132944	-0.518915	0.197003	-0.199915	-0.129344	-0.09709	0.190228	0.139993	0.643905	-0.233747		8	6
RP11-180N14	3	21314358	21484066	0.413991	0.174251	-0.054515	0.269419	0.041161	-0.073007	0.214359	-0.146931	-0.303867	-0.068868	-0.475544	0.238276	-0.079442	0.036907	0.18731	0.065794	0.028057	0.10012	0.240373	0.197854	-0.052871	0.540419	0.133278	0.166617	-0.116326	0.092405	0.115684	-0.06041	-0.080305	0.164042	0.15355	0.141126	-0.08917		8	6
RP11-16E8	3	21574260	21742237	0.484887	0.240113	-0.251229	0.272142	-0.069071	0.066101	0.229819	-0.281585	-0.399354	-0.12377	-0.45266	0.134353	0.045963	0.009735	0.056048	0.095363	0.057612	0.330183	0.255638	0.376753	-0.052115	0.540864	0.000555	0.039533	-0.589091	0.097594	-0.135856	-0.109303	-0.050008	0.216402	0.121298	0.700962	-0.172005		8	6
RP11-208G16	3	22372629	22514821	0.407834	0.066381	-0.136187	0.290027	-0.038212	0.063326	0.168231	-0.153946	-0.37702	-0.173607	-0.374539	0.268378	-0.016393	0.002694	0.084209	0.050523	0.073116	0.15861	0.214408	0.164513	-0.016031	0.389213	0.132116	0.182521	-0.369678	0.165835	-0.145626	-0.030372	-0.086593	0.18159	0.095025	0.397973	-0.210088		8	6
RP11-89F18	3	23404804	23575751	0.154773	-0.84523	-0.099444	0.0234	-0.266047	-0.104215	-0.117605	-0.45661	-0.50929	-0.582222	-0.382703	-0.150421	-0.294894	-0.020621	-0.268255	0.006744	-0.127578	-0.250973	-0.200191	0.078496	-0.09354	-0.190577	-0.221356	-0.074505	-0.480928	-0.053568	0.023002	-0.10025	-0.116652	-0.33825	-0.086413	-0.06941	0.232441		7	6
RP11-18L17	3	24167259	24311442	0.351399	-0.738741	-0.164638	0.268889	0.007394	-0.041078	0.209404	-0.246079	-0.400241	0.109453	-0.363079	0.178106	0.112545	-0.019681	0.102628	-0.002737	-0.039453	0.313336	0.279893	0.248572	-0.018903	-0.160665	-0.045876	-0.10877	-0.448511	0.041871	-0.272888	-0.111424	-0.043652	0.133378	0.084475	0.704061	-0.010847		7	6
RP11-421F9	3	25447987	25518546	0.143582	0.114173	-0.168414	0.060848	-0.034256	0.047582	0.142208	-0.110712	-0.284825	-0.0133081	-0.171803	0.104892	-0.14343	-0.007446	0.079829	-0.044151	-0.101635	-0.024024	0.382015	0.306374	0.032289	-0.191351	-0.019212	0.0957495	-0.33833	-0.009192	-0.142279	-0.025863	-0.077938	0.100121	0.062673	0.570616	-0.304283		7	6
RP11-226E22	3	26718031	26882772	0.056905	0.130464	-0.27705	0.118239	-0.163213	-0.052435	0.098563	-0.29832	-0.427597	-0.290377	-0.441701	0.0313137	-0.138437	0.114848	-0.0354721	-0.022679	0.05791	0.008177	0.154867	0.219583	-0.036166	-0.099333	-0.025077	-0.04502	-0.451402	0.0173047	-0.0230989	-0.084439	-0.0501417	0.0042681	-0.0312378	0.24996	-0.199277		7	6
RP11-2G22	3	27349564	27531283	0.539909	0.299704	-0.050089	0.27534	-0.054361	-0.053669	0.276829	-0.090767	-0.211733	-0.090862	-0.35432	0.075563	0.007786	0.224704	0.175577	0.064637	0.195843	0.164721	0.308278	0.400564	0.00069	0.206778	0.103844	0.22155	-0.474605	0.1601	-0.067341	-0.029046	-0.06532	0.306583	0.185179	0.489367	-0.061998		8	6
RP11-11L6	3	28645912	28824358	0.45894	0.193149	-0.205715	0.237591	-0.02562	-0.100339	0.137786	-0.195347	-0.573194	-0.044667	-0.061612	0.198753	-0.171187	0.067172	0.074258	0.093718	0.018091	0.192618	0.210756	0.43539	0.032199	-0.058667	0.076191	-0.020798	-0.482916	0.100391	-0.071729	-0.090178	-0.061527	0.105384	0.151256	0.410485	-0.254263		8	6
RP11-30G4	3	28813263	28966852	0.586928	0.238613	-0.177019	0.253426	-0.154728	0.097736	0.131992	-0.36769	-0.625898	-0.119323	0.030471	0.123771	-0.083278	0.187254	-0.024581	0.056443	-0.011037	-0.011938	0.396507	0.214263	-0.098536	-0.099397	0.12902	-0.022449	-0.479594	0.082479	0.042491	-0.039267	-0.071967	0.098892	0.138447	0.523513	-0.321765		8	5
RP11-103N21	3	29867264	30018477	0.392392	0.09324	-0.100936	0.112159	0.04199	-0.007653	0.301782	0.286325	-0.45265	-0.054485	-0.115578	0.105992	-0.133234	0.322473	0.146687	0.025144	0.225389	-0.026427	0.1175	0.130997	0.017956	0.086342	0.220112	0.463221	-0.209657	0.131833	-0.246841	-0.033503	-0.070371	0.265078	0.031365	-0.145489	-0.016962		8	5
RP11-69K20	3	30275511	30447593	0.613402	0.230731	-0.277257	0.099119	-0.137811	0.010725	0.105766	-0.284367	-0.58224	-0.267072	0.088329	0.148754	0.10325	0.058428	-0.060738	0.072789	-0.119741	0.034122	0.311655	0.493784	0.036149	-0.032119	0.146584	-0.057015	-0.19781	0.084868	0.021662	0.001211	0.004029	0.112022	0.019281	0.567961	-0.199944		8	5
RP11-7I16	3	30704315	30705070	0.433511	0.155538	-0.157289	0.302728	-0.071855	0.025495	0.233588	-0.274832	-0.58033	-0.16107	-0.145593	0.061883	0.310073	0.071714	0.044208	0.085125	0.059131	0.110009	0.24614	0.40593	0.016009	0.045286	0.161124	0.044883	-0.244382	0.087962	-0.023088	0.035834	-0.022775	0.098695	0.089039	0.475705	-0.200807		8	5
RP11-48E16	3	31634821	31812073	-0.065455	0.160214	-0.240528	0.190726	0.037409	-0.096214	0.07703	-0.40035	-0.630064	-0.201346	-0.008427	0.049963	0.032833	-0.061939	0.081427	0.098037	-0.095267	0.25121	0.191523	0.489883	0.015288	-0.229732	-0.003771	-0.132767	-0.297252	0.006102	-0.064729	-0.024226	-0.073787	0.162519	0.125683	0.78933	-0.346176		7	5
RP11-524O15	3	32453732	32650841	0.115965	-0.121152	0.303166	-0.064706	-0.132348	0.018416	-0.018184	-0.384508	-0.227704	-0.22081	0.015019	-0.043237	0.014293	0.084925	-0.030153	0.124041	-0.114855	0.024892	0.250968	0.094202	0.017252	-0.084054	-0.007608	-0.333801	0.096492	-0.064367	-0.08426	-0.017409	-0.05511	-0.034141	0.06804	0.570633	-0.046865		6	4
RP11-35C18	3	34495503	34655809	-0.018282	0.594402	-0.220838	0.229593	-0.081391	0.113265	0.222284	-0.327499	-0.640685	-0.202983	-0.045594	0.108315	-0.1082	0.081567	-0.020637	0.013653	-0.002855	0.259489	0.215601	0.002651	0.016977	-0.024153	0.218801	0.028757	-0.12006	0.102537	-0.154675	0.029758	-0.108004	0.197458	-0.108767	0.829006	-0.340296		6	4
RP11-56P22	3	34981197	35131137	0.032979	0.29658	-0.13184	0.172209	-0.1948	0.034199	0.177023	-0.205252	-0.408594	-0.123542	-0.078505	0.058559	-0.029125	0.166781	-0.010423	0.007147	0.02743	-0.037409	0.324242	0.015675	-0.09606	0.055281	0.22975	0.106912	-0.111719	0.125285	-0.013225	-0.023401	-0.019165	0.258544	-0.077655	0.761068	-0.167576		6	4
RP11-380G10	3	35590144	35766135	0.003945	0.434659	-0.217435	0.316018	-0.089195	0.006638	0.281761	-0.201711	-0.561485	-0.061526	-0.115633	0.212743	-0.04922	0.182101	0.097066	0.069863	0.156508	0.274059	0.203872	0.005808	-0.023022	0.045184	0.11256	0.072163	-0.162443	0.136105	-0.330525	-0.074467	-0.152578	0.270547	-0.161311	0.775835	-0.14999		6	4
RP11-134C18	3	36562383	36744610	0.009073	0.512896	-0.126024	0.2024	0.061066	0.072411	0.147009	-0.218004	-0.452425	-0.010207	0.111754	0.135168	0.064981	0.092224	0.166174	0.07331	-0.020137	0.188494	0.324798	-0.024907	-0.058317	-0.176427	0.078981	0.107647	-0.221518	0.075185	-0.151788	-0.063775	-0.072983	0.212757	-0.074538	0.819145	-0.146757		6	4
RP11-129K12	3	36866838	37036150	-0.066631	0.405015	-0.210134	0.2213	-0.059743	0.037468	0.147308	-0.278547	-0.5163	-0.019311	-0.047987	0.152688	0.26927	0.081205	0.036295	0.015364	0.005277	0.080734	0.268276	0.20251	0.021137	-0.004353	0.107989	0.021339	-0.268933	0.092635	-0.057418	0.016141	-0.036266	0.11123	-0.050082	0.642494	-0.194019		6	4
RP11-331G2	3	39135103	39311642	-0.22838	0.167281	-0.333474	0.09272	0.058685	0.058876	0.057202	-0.429115	-0.366281	-0.03803	0.028423	-0.014959	0.090745	-0.116422	0.062114	-0.006655	-0.121888	0.004157	0.264463	-0.217467	0.066576	-0.219404	-0.069845	-0.109939	-0.080307	-0.033817	0.001816	-0.066966	0.0548	0.024892	-0.097283	0.0881651	-0.195703		6	5
RP11-66G8	3	39667049	39836466	-0.118126	0.309246	-0.189948	0.122206	0.042974	-0.109618	0.158647	-0.371606	-0.48589	-0.036948	-0.012517	0.050989	-0.134563	-0.01009	0.068643	-0.023145	-0.095994	0.198182	0.202323	-0.147566	0.01488	-0.145884	-0.113223	0.026392	-0.075649	-0.038175	-0.067095	-0.049106	0.008696	0.089702	-0.05082	0.847145	-0.04058		6	6
RP11-527M19	3	41172081	41354719	-0.05714	0.39976	-0.284687	0.122214	0.113144	0.076279	0.024785	-0.506272	-0.456768	-0.05599	0.05786	-0.013074	-0.088374	0.018978	-0.029641	-0.010798	-0.149536	0.026975	0.356673	-0.267861	0.015626	-0.134093	-0.153977	-0.066579	-0.168989	-0.019891	-0.074722	-0.020992	-0.013418	0.072516	-0.114472	0.737606	-0.321556		7	6
RP11-437N10	3	42498457	42700997	0.063097	0.206645	-0.111023	0.157786	0.195075	0.173023	0.062413	-0.234843	-0.342581	-0.045391	-0.051468	0.086343	0.122848	0.073986	-0.011763	0.112273	-0.052688	0.201953	0.325908	-0.061419	0.136979	0.047904	-0.019385	0.017928	-0.072066	0.037658	-0.033723	0.058288	0.026583	0.074418	-0.023084	0.453423	-0.122717		7	6
RP4-613B23	3	42599809	42784969	-0.025717	0.319413	-0.198972	0.169316	0.179738	0.011919	0.072688	-0.411755	-0.466874	0.065218	-0.04622	0.0277388	0.106818	0.041184	0.055944	0.066566	-0.032343	0.110464	0.355861	-0.204764	0.014883	-0.188545	-0.158986	0.020918	-0.183431	0.018958	-0.109948	-0.000135	-0.030673	0.122264	-0.08233	0.87093	-0.243029		7	6
RP11-189H19	3	44567516	44737858	-0.079895	0.502015	-0.198232	0.176297	0.217495	0.001108	0.100641	-0.375691	-0.589854	-0.073311	0.008114	0.020485	-0.06741	-0.016967	0.021305	0.02183	-0.091065	0.340578	0.256563	0.115573	0.047183	-0.172452	-0.082035	-0.027611	-0.108535	0.006107	-0.020985	0.050323	-0.023916	0.092032	-0.048368	0.890826	-0.164577		7	6
RP11-111P21	3	45315409	45497977	-0.078441	0.405477	-0.149456	0.156539	0.171403	0.053763	0.088217	-0.386243	-0.584853	0.050922	0.09683	0.034763	-0.02262	0.032128	0.052969	-0.011715	-0.126948	-0.005978	0.440813	-0.352859	-0.035298	-0.114781	-0.134874	0.048598	-0.121552	0.048698	-0.164884	0.074037	-0.012924	0.150813	-0.108924	1.10388	0.022165		7	6
RP11-91E8	3	45989826	46150224	-0.04077	0.361293	0.301926	0.208519	-0.026053	0.030231	0.046149	0.025583	-0.473745	-0.215268	-0.029063	0.166752	0.157494	0.197932	0.417379	0.046407	-0.025993	0.201397	0.224717	-0.086888	0.078442	-0.062001	0.058815	0.081008	-0.076795	0.022605	-0.004488	0.014699	0.084867	-0.16993	-0.103123	0.300272	-0.057653		7	6
RP4-544D10	3	47295529	47384746	-0.102629	0.236201	-0.450959	-0.129628	0.211942	0.011632	-0.150462	-0.511431	-0.523714	-0.15997	0.226102	-0.183082	-0.075876	-0.255712	-0.169448	-0.094125	-0.386312	-0.000823	0.282051	-0.037435	0.095266	-0.329308	-0.22341	-0.25569	-0.078807	-0.172577	-0.080599	0.118612	0.01684	-0.096854	-0.100345	0.983548	-0.077872		7	6
RP11-88B8	3	47858079	48047343	-0.031993	0.234148	-0.186381	0.01114	0.137288	-0.048882	0.053198	-0.425125	-0.356811	-0.159605	0.118568	-0.066675	-0.095157	-0.083295	0.135636	0.008172	-0.158043	0.034547	0.341705	-0.157334	0.039876	-0.259967	-0.19316	-0.017803	-0.15558	-0.068381	-0.036256	0.113928	-0.029876	0.067123	-0.046272	0.821612	-0.194658		7	6
RP1-289H18	3	48080483	48208886	-0.114553	0.114546	-0.219228	-0.026096	0.031615	0.102039	0.086508	-0.321193	-0.090741	0.267571	-0.03514	-0.109294	-0.007155	-0.079282	0.211444	-0.01262	-0.106581	-0.031401	0.225445	-0.209122	-0.030246	-0.105637	-0.134671	0.078991	0.205024	-0.000696	-0.205065	0.051712	0.021251	0.145286	-0.164436	0.656648	0.096973		8	5
RP11-24C3	3	48357034	48512503	-0.244076	0.186044	-0.217952	0.108479	0.122295	0.145535	0.007149	-0.443272	-0.276541	0.145284	0.124552	-0.00275	0.173254	-0.164377	0.047344	-0.016093	-0.117537	-0.083388	0.278873	-0.120483	0.080181	-0.22868	-0.299876	-0.039854	0.339122	-0.041161	-0.124604	0.176791	0.020878	0.062493	-0.079482	1.10424	0.0249392		8	5
RP11-3B7	3	49222551	49393337	0.005613	0.27309	-0.151785	0.117714	0.096232	0.01879	0.111873	-0.27997	-0.383396	-0.086424	-0.123201	-0.023862	0.236513	0.028102	0.091273	0.141217	0.020776	0.137272	0.163616	-0.099115	0.051446	0.014157	-0.155818	0.09922	0.20719	0.023915	-0.027774	0.161606	-0.041134	0.131553	0.106733	0.730249	-0.124113		8	5
RP11-78O10	3	49843918	50006856	-0.302604	0.258748	-0.309949	0.060615	0.098088	0.046755	-0.036147	-0.502256	-0.357952	0.042136	0.073336	-0.054968	0.157311	-0.328173	0.116667	-0.036714	-0.259355	-0.242104	0.300366	-0.080698	0.090549	-0.297077	-0.339385	0.120842	0.600949	-0.101317	0.028283	0.118902	0.017105	0.020399	-0.105229	0.919341	0.115806		7	5
RP11-89F17	3	51390597	51559095	-0.019425	-0.413716	0.126049	-0.076188	-0.093116	0.080924	-0.007365	-0.173336	-0.038444	-0.285614	-0.139408	-0.009893	-0.100474	-0.059355	0.134137	-0.003601	0.008236	-0.002555	0.170161	-0.099067	-0.003282	-0.066459	-0.077316	0.19748	-0.255981	0.021289	-0.069033	-0.003565	-0.110348	0.007435	-0.014823	0.767777	0.20814		7	6
RP11-314A5	3	51791953	52007218	-0.114543	-0.620449	-0.253202	0.14	0.054868	0.060249	0.089779	-0.436162	-0.416384	-0.026288	0.035582	-0.050774	0.105927	-0.061753	0.069118	-0.010433	-0.102659	-0.141592	0.261597	-0.272799	-0.003195	-0.369969	-0.184061	-0.039381	0.385261	-0.01213	-0.025092	-0.015336	-0.063859	-0.011057	-0.080669	0.021512	-0.078159		7	6
RP11-447A21	3	52556292	52743025	0.059937	0.468374	-0.269775	0.073312	0.104885	0.078538	0.197319	-0.321029	-0.465179	-0.038561	0.102602	0.120557	0.203149	-0.017344	-0.013986	0.000455	-0.030039	0.009855	0.319282	-0.102017	0.08537	0.066491	-0.085555	0.034071	0.59674	0.074942	0.096492	0.211996	-0.010332	0.201522	-0.124754	0.152232	-0.191898		7	6
RP11-122D19	3	54007389	54188449	0.213336	-0.833882	-0.365862	-0.011612	0.068719	0.144556	0.042233	-0.362268	-0.559769	-0.0453511	-0.003521	0.017786	-0.228241	-0.121949	0.049687	-0.101976	-0.290901	-0.112115	0.252457	-0.170272	0.090837	-0.203507	-0.234889	0.0512174	0.50364	-0.107973	-0.057029	-0.031545	0.006129	0.077859	-0.166744	0.304032	-0.124213		8	7
RP11-554O1	3	54612410	54778936	0.249297	-0.991468	-0.279497	0.057815	0.112466	0.100813	-0.007038	-0.434715	-0.593439	-0.02792	-0.029151	-0.00305978	-0.250813	-0.025697	-0.03369	-0.078969	-0.198273	-0.282137	0.281583	-0.291264	-0.047817	-0.230012	-0.284097	0.21988	0.470856	-0.02304	-0.173807	-0.042543	-0.041727	0.03022	-0.160759	-0.038755	-0.341405		8	7
RP11-58O15	3	55606071	55797580	0.168685	-0.827557	-0.336238	0.011751	0.168539	0.023546	-0.059664	-0.424862	-0.342863	-0.101688	0.000257	0.017875	-0.214887	-0.257574	0.059995	-0.067843	-0.199537	-0.34092	0.233061	-0.29805	0.00873	-0.301097	-0.34091	0.062588	0.53458	-0.109624	-0.183776	-0.158859	-0.054601	0.022354	-0.261841	0.548655	-0.271131		8	7
RP11-229A12	3	57370434	57534933	0.382956	0.45059	-0.274878	0.272306	-0.021178	0.370346	0.220862	-0.274591	-0.159053	-0.115728	-0.038865	0.123113	0.109467	0.253531	0.022326	0.205849	0.082328	0.194708	0.259328	-0.209204	0.044839	0.102263	-0.170613	0.0848085	0.125336	0.103805	0.0499908	0.095592	-0.019673	0.055838	-0.004994	0.490881	-0.0291057		8	7
RP11-80H18	3	58149203	58327213	0.405169	-0.697815	-0.207148	0.157134	0.18189	-0.024282	0.075759	-0.421016	-0.514672	-0.134432	-0.023119	0.067985	0.071043	-0.059889	0.085727	0.097449	-0.06544	0.310104	0.217779	-0.144	0.099981	-0.096882	-0.189247	0.25303	0.422997	0.003986	0.617473	0.129109	0.000849	0.055811	-0.053564	0.656172	0.031236		8	7
RP11-170K19	3	59701342	59875950	0.300303	-0.899666	-0.30331	0.139373	0.137175	0.048311	0.140637	-0.380216	-0.548355	-0.05743	-0.051913	-0.001319	-0.129773	-0.048763	0.047164	-0.005251	-0.075626	0.060464	0.257971	-0.186376	0.012817	-0.175046	-0.273272	0.282961	0.5792	0.021285	-0.001435	-0.124448	-0.059503	0.054047	-0.160702	0.489602	-0.017746		8	7
RP11-154D3	3	62016747	62182595	0.429559	-0.923327	-0.311056	0.150499	0.078347	0.0794921	0.083997	-0.462393	-0.596922	0.020651	-0.048131	-0.046471	-0.1574	0.09148	-0.068992	-0.026902	-0.120829	0.082008	0.321674	-0.221757	-0.039797	-0.132196	-0.26497	-0.065545	0.579831	-0.010698	-0.216914	-0.05801	-0.028339	0.150469	-0.164141	0.595073	-0.069432		8	7
RP11-204J18	3	62190612	62347194	0.405434	-0.899513	-0.246654	0.156839	0.154371	-0.031905	0.174204	-0.329777	-0.477988	-0.1504	-0.023559	0.110696	-0.194257	-0.007814	0.056826	0.021775	0.01273	0.160761	0.253087	-0.225687	-0.033651	-0.138842	-0.262246	-0.020732	0.540972	0.082308	-0.041999	-0.111642	-0.092251	0.077173	-0.167859	0.335464	0.050362		8	7
RP11-108A8	3	63254921	63396321	0.116599	-0.290239	-0.155495	0.27815	0.154765	-0.023797	0.248052	0.205248	-0.707004	-0.144381	1.05079	0.138276	-0.041557	0.253071	-0.207402	0.073846	0.081683	0.075986	0.223669	-0.052918	0.158629	-0.014835	0.02395	0.302399	0.019002	0.096459	0.465729	0.098366	-0.005223	0.058815	-0.063962	0.102766	-0.228615		9	7
RP11-9A1	3	64198694	64357759	0.403873	-1.11272	-0.332092	0.217926	0.071995	-0.093871	0.133693	-0.30787	-0.542415	-0.046858	-0.041757	0.160808	-0.082384	-0.022044	0.045174	-0.045988	-0.045381	0.123641	0.279143	-0.250267	0.067275	-0.161025	-0.318256	1.56431	0.642285	0.064849	-0.131142	-0.090858	-0.051218	0.153118	-0.158216	0.501429	0.0618		9	7
RP11-88H12	3	65182347	65361126	0.325236	0.325058	-0.047888	0.164805	-0.067365	-0.097071	0.015756	-0.500239	-0.5348	0.032262	-0.135448	0.124788	-0.20143	0.122545	0.09172	0.041337	-0.011545	0.115406	0.028405	0.0938149	-0.113217	0.176045	-0.126285	0.0486487	0.195458	0.051856	0.070135	0.013463	-0.133533	-0.23344	-0.0058	0.614272	-0.058518		9	6
RP11-24O17	3	66860334	67018893	0.40443	0.724625	-0.298859	0.04283	0.093053	0.077843	0.052473	-0.484665	-0.544894	-0.182883	0.04185	0.018142	-0.114113	-0.068773	-0.072537	-0.065029	-0.184746	0.116085	0.23495	-0.165597	0.015783	-0.213036	-0.26872	0.968463	0.560811	-0.000405	0.032757	-0.001121	-0.004361	0.08795	-0.11371	0.772471	0.435816		9	6
RP11-79C12	3	68008697	68146379	0.28728	-0.728517	-0.178639	0.174412	0.059349	0.00548767	0.220306	-0.22108	-0.285844	-0.134175	-0.154285	-0.0222571	-0.185955	0.014384	0.089159	0.042547	-0.004399	0.149335	0.196046	-0.172942	-0.043444	-0.137342	-0.234075	0.0504831	0.424936	0.013762	-0.0677568	-0.088181	-0.026706	0.124174	-0.100151	0.460771	-0.0188449		9	6
RP11-152N21	3	69383517	69541168	0.239965	-0.712497	-0.235692	-0.051168	-0.051537	0.148075	-0.102284	-0.565969	-0.548803	0.109311	-0.00466	-0.212152	0.125946	0.019992	0.005843	0.082532	-0.206602	0.056213	0.358458	-0.275131	-0.019795	-0.163605	-0.138123	-0.016019	0.644006	-0.013777	-0.0694407	0.082627	-0.014347	0.105589	-0.094028	0.593703	-0.0988113		9	6
RP11-118O11	3	70632733	70792904	0.469406	0.719826	-0.155531	0.229692	0.187725	0.124857	0.377402	-0.095121	-0.456326	-0.0696516	0.074735	0.315586	-0.135585	0.109996	0.0631155	0.093463	0.044031	0.146141	0.343789	-0.244031	0.089558	-0.001489	-0.132262	0.61028	0.795585	0.077197	-0.347332	-0.065971	-0.014745	0.271236	-0.151583	0.934794	0.0243504		9	6
RP11-154H23	3	71622956	71816508	0.302972	-0.9026	-0.284845	0.082595	0.220587	-0.045371	0.093192	-0.384991	-0.483559	0.002641	-0.016134	-0.015837	0.032613	-0.024867	0.036163	-0.043261	-0.105727	0.047604	0.270033	-0.216182	0.100369	-0.13067	-0.271398	0.766656	0.600686	0.01473	-0.052885	-0.039422	-0.043248	0.103503	-0.094712	0.591437	0.149568		9	6
RP11-522N9	3	72455281	72633499	0.30647	1.26402	-0.338103	0.094158	0.162888	-0.020612	-0.036209	-0.291797	-0.381655	0.005583	0.048738	0.03812	0.07187	-0.15659	0.008117	-0.001489	-0.123958	0.12489	0.258949	-0.307686	0.059258	-0.202471	-0.283514	0.734663	0.498675	-0.049073	-0.0657429	0.060048	-0.050612	0.055068	-0.176243	0.579457	0.062612		10	6
RP11-252O10	3	73463946	73612108	0.309567	0.84171	-0.330438	0.126814	0.154928	-0.036453	0.134757	-0.374422	-0.550333	-0.079716	-0.013246	0.067432	-0.204953	-0.144305	0.030956	0.004031	-0.140512	0.133184	0.195718	-0.253487	0.004928	-0.260034	-0.290349	0.841064	0.66686	-0.02044	-0.221714	-0.105659	-0.100326	0.075747	-0.205239	0.618761	-0.018121		10	6
RP11-20B7	3	73854898	74026003	0.223475	1.35863	-0.284073	0.069156	0.111698	0.108623	0.066859	-0.344368	-0.505052	-0.006613	0.246095	-0.110833	-0.189428	0.0424689	-0.030248	0.051959	-0.268088	0.143488	0.212332	-0.178847	0.068712	-0.223358	-0.144807	0.46877	0.312686	-0.060217	-0.093204	0.014037	-0.250042	0.076026	-0.174783	0.704018	-0.018231		10	6
RP11-11L10	3	74234096	74391234	0.470314	1.28509	-0.084995	0.190027	0.259072	-0.092713	0.223147	-0.141416	-0.255417	-0.094188	-0.093745	0.289711	-0.117844	0.031215	0.006157	0.075636	0.070762	0.151852	0.187116	-0.281721	-0.012529	-0.015507	-0.243858	0.514163	0.219325	0.113297	-0.209418	-0.131174	-0.069613	0.199003	-0.215095	0.637597	0.188095		10	5
RP11-514J23	3	76310308	76477952	0.304164	0.72944	-0.04452	0.277932	0.094893	0.152514	0.263855	0.019647	-0.388745	-0.044193	-0.01629	0.145477	-0.227823	0.068693	0.074923	0.010166	0.026916	0.187668	0.279827	-0.270496	-0.053954	0.023074	-0.140692	0.731828	0.294039	0.154061	-0.127109	-0.133656	-0.048261	0.164686	-0.120761	0.485893	-0.000395		11	5
RP11-220O14	3	77650543	77654543	0.26888	0.692607	-0.18354	0.137539	0.049504	0.150789	0.208602	0.16299	-0.142278	-0.161113	-0.118249	0.207485	-0.133661	0.147785	0.002132	0.007356	0.211806	0.094537	0.181511	-0.347452	0.002613	0.137613	-0.19127	0.103335	0.265519	0.137463	0.021191	-0.05364	-0.0759	0.24915	-0.220982	0.192159	-0.103637		11	5
RP11-16M12	3	78395760	78564986	0.341674	0.975821	-0.106788	0.193045	0.091886	0.186594	0.228478	0.078763	-0.297795	-0.0466915	0.032276	0.052836	-0.186211	0.204236	0.108585	0.043964	0.064569	0.088669	0.354761	-0.167734	-0.067753	0.016896	-0.137167	0.171833	0.227734	0.08534	0.254416	-0.072576	-0.045492	0.219924	-0.072633	0.401385	-0.043929		11	5
RP11-333I20	3	78932918	79097077	0.464745	0.872291	-0.200388	0.253962	0.274938	0.166321	0.243996	1.19695	-0.494913	-0.106243	0.043332	0.216034	-0.122377	0.082261	0.105174	0.058696	-0.015411	0.156833	0.338517	-0.218768	0.08224	-0.0264	-0.164438	0.075557	0.273915	0.132478	0.324034	-0.057025	-0.055763	0.196443	-0.087588	0.575161	0.003467		12	5
RP11-26H10	3	80133749	80297117	0.44233	0.847034	-0.06392	0.323939	0.037969	0.148374	0.20222	0.747245	-0.441742	-0.017288	-0.007732	0.216542	-0.141579	0.141485	0.091037	0.049179	0.095132	0.112891	0.382737	-0.241783	0.02814	0.090438	-0.109743	0.095744	0.34508	0.197307	-0.171329	-0.085723	-0.059907	0.181357	-0.106045	0.702091	-0.018319		12	5
RP11-425D6	3	81649533	81650325	0.50661	1.20586	-0.152496	0.334004	0.081504	0.134599	0.34877	0.726536	-0.538638	-0.197496	-0.108028	0.261099	-0.123723	0.104167	0.076029	0.076408	0.106786	0.254759	0.256348	-0.256776	0.095025	0.074492	-0.101064	0.916862	0.328156	0.139491	-0.108308	-0.02785	-0.102444	0.210524	-0.124935	0.857509	0.081189		12	5
RP11-442C9	3	81647507	81740107	0.458128	1.07763	-0.105374	0.234353	0.085551	0.157062	0.222445	0.588845	-0.288376	0.14151	-0.089425	0.220677	-0.103562	0.119169	0.134169	-0.079908	0.117063	0.212529	0.267746	-0.203443	0.061184	0.046651	-0.101765	0.853925	0.321188	0.078384	-0.203761	-0.024575	-0.136219	0.235702	-0.110815	0.63947	-0.082704		12	5
RP11-359D24	3	81904890	82066186	0.523071	1.29569	-0.082009	0.355069	0.295368	0.384883	0.445903	0.589954	-0.475807	-0.04144	-0.067962	0.243925	0.05491	0.17363	0.109106	0.09118	0.09625	0.349914	0.280199	-0.263947	0.092241	0.08182	-0.234389	0.979748	0.288429	0.154562	-0.356148	-0.054456	-0.053476	0.316542	-0.071902	1.23844	0.322773		12	5
RP11-206J21	3	82655791	82799472	0.255894	0.891049	-0.192732	0.157846	0.045989	0.248863	0.187447	0.530127	-0.386798	-0.225348	-0.075431	0.179658	-0.23117	-0.089663	0.078856	-0.036519	-0.070462	0.026731	0.221062	-0.301591	0.056822	0.0272508	-0.137173	0.48768	0.271801	-0.017342	0.259944	-0.066881	-0.095798	0.270147	-0.129518	1.01885	0.008254		12	5
RP11-382L10	3	83811935	83922050	-0.222019	0.229861	-0.315778	-0.03517	-0.23224	0.096357	0.028024	0.20743	-0.32356	-0.238959	-0.449559	-0.015874	-0.130037	0.317734	0.049206	-0.180235	0.092064	-0.014271	0.259295	-0.121222	-0.027758	-0.095073	-0.137282	0.076837	0.22825	0.072735	-0.016659	0.422024	-0.07701	-0.297696	-0.185695	-0.153181	-0.404877		13	5	3.91832	3p
RP11-474M18	3	84623842	84801874	0.368337	1.05018	-0.106516	0.305694	0.127483	0.499402	0.355064	1.04817	-0.312514	-0.064319	-0.08962	0.122914	-0.189176	0.041393	0.188841	-0.088646	0.051026	0.03595	0.2581	-0.320976	0.035669	0.082378	-0.128519	0.480504	0.365079	-0.000341	-0.203601	1.12117	-0.31008	0.118315	-0.264052	1.14922	0.062604		13	5
RP11-447J13	3	86088395	86268610	0.30175	0.914774	-0.080429	0.118353	0.013099	0.611907	0.135902	0.306824	-0.298554	-0.04222	0.005619	0.614736	-0.017367	0.078231	0.156692	0.071014	-0.0105	0.131353	0.282658	-0.152568	0.05436	0.046092	-0.038939	0.380958	0.206885	0.018602	0.0373622	0.909066	-0.09869	0.103756	0.343183	0.616673	0.091511		13	5
RP11-81P15	3	87044531	87223753	0.226665	0.89219	-0.252329	0.206494	0.07578	1.94108	0.333843	0.606829	-0.447153	-0.063414	0.022508	0.276247	0.13652	0.076722	-0.026756	0.036735	0.091119	0.145968	0.309913	-0.146617	0.211123	0.055806	-0.050821	0.604164	0.429316	0.06932	-0.0939873	2.35248	-0.0548324	0.20531	0.132962	1.14285	0.005647		13	5
RP11-312H1	3	87569839	87730259	0.359865	1.51101	-0.223789	0.072495	0.042105	1.8455	0.168417	0.556955	-0.283518	-0.187928	-0.038457	0.443657	-0.032387	-0.011502	0.082688	-0.023619	-0.004858	0.051328	0.305634	-0.218316	0.041151	-0.021227	-0.21952	0.581098	0.425755	0.129382	-0.050944	0.197693	-0.011974	0.138375	0.648758	0.928707	0.071179		13	5
RP11-88I7	3	95519622	95706420	0.209072	0.254369	0.040324	-0.06553	0.102183	-0.040824	0.185722	0.134516	-0.217242	-0.171876	-0.226406	0.070356	-0.132072	0.242402	-0.356086	-0.122586	0.103799	-0.026823	0.219647	0.019506	-0.126832	0.274636	-0.016999	0.355122	-0.081964	0.120127	-0.097285	0.068851	-0.010372	0.054742	-0.130434	-0.07208	0.0366084		10	3
RP11-12A13	3	96093190	96250469	0.258823	0.352157	-0.100997	0.011445	0.170097	-0.085576	0.38973	0.522662	-0.316476	-0.074574	0.176684	0.199063	-0.130733	0.328587	0.202991	0.01657	0.263889	0.117029	-0.074895	-0.011958	-0.012522	0.282585	0.134871	0.495302	-0.183275	0.150153	-0.03533	0.090124	-0.014093	0.233467	-0.104487	-0.112024	0.369504		10	4
RP11-12J13	3	97022208	97176859	0.065082	0.461179	0.169439	0.018048	-0.157683	0.073285	0.158503	0.317122	-0.214676	-0.082125	0.056527	0.031274	-0.057949	0.132236	-0.125025	-0.003266	0.064855	0.013111	0.154065	-0.120124	-0.084458	0.047414	0.247247	0.375803	-0.162321	0.07141	-0.066516	-0.022018	0.028352	-0.107556	-0.053128	-0.156221	0.281612		10	5
RP11-529P9	3	98524225	98714854	0.234108	0.478195	-0.163952	-0.034026	0.091982	0.020276	0.226436	0.472872	-0.442871	-0.037597	0.201024	-0.005943	-0.245951	0.359509	0.005704	-0.01175	0.18464	0.046122	-0.04398	-0.060109	-0.063324	0.250114	0.154151	0.362806	-0.230801	0.10624	-0.299801	-0.049242	0.010153	0.24564	-0.18919	-0.475907	0.106447		9	5
RP11-214N20	3	99256544	99288218	0.196239	-0.319672	-0.257847	-0.060821	0.004471	0.060135	0.062465	0.32196	-0.36794	-0.097163	0.142993	-0.0513595	-0.09726	0.229619	-0.040758	0.030486	0.06371	-0.036039	0.021988	-0.016493	-0.074746	0.149502	0.076081	0.144769	-0.227579	-0.014199	0.0146379	-0.002375	0.035006	0.03038	-0.112648	-0.448757	-0.004795		8	5
RP11-569H14	3	99856399	99905946	0.146927	-0.107453	-0.306007	-0.193662	0.123922	0.05556	0.145458	0.285144	-0.313089	-0.079374	0.181889	0.003978	0.058324	0.253187	-0.115312	-0.001853	-0.005234	0.190266	-0.091141	0.060004	0.0683	0.215935	0.061338	0.083877	-0.39878	0.036833	0.036305	0.072989	0.03402	0.180927	-0.112501	-0.371916	0.043264		8	5
RP11-121C1	3	100490741	100545594	0.031845	-0.004941	-0.015994	-0.07065	0.151648	-0.037372	0.075055	0.284658	-0.228876	-0.155763	-0.024545	0.12567	-0.090876	0.184999	0.00198511	0.043446	0.037039	0.196461	0.140681	-0.010192	0.046652	-0.041566	0.147114	0.194695	-0.069314	0.074121	-0.078587	-0.030065	0.078532	0.039155	-0.048964	0.145521	0.0873001		8	5
RP11-114I8	3	101478697	101632377	0.128645	-0.004076	-0.122624	-0.078728	0.08554	0.112543	0.141582	0.319444	-0.363461	-0.180506	-0.125557	0.0736324	-0.018801	0.390931	0.038005	-0.050422	0.005956	0.176036	0.079909	-0.012827	-0.057006	0.173506	0.198443	0.376401	-0.239763	0.123713	-0.13753	0.080589	0.028653	0.130331	0.036348	-0.173585	0.026713		8	5
RP11-49I4	3	102991639	103144287	0.254575	-0.383442	-0.300174	-0.267824	0.134417	-0.071709	0.084046	0.282473	-0.554907	-0.427977	0.017697	-0.098712	-0.015281	0.227101	-0.110808	-0.02987	-0.045263	-0.166395	-0.074403	0.1425	0.08784	-0.112173	0.074805	0.177125	-0.2987	-0.056598	-0.055287	0.140631	-0.058059	0.041827	-0.142277	-0.337101	0.033921		8	5
RP11-17H6	3	104141030	104174030	0.389189	0.467716	-0.000483	0.090403	0.189708	0.047057	0.439676	0.563227	-0.348533	0.075788	-0.094163	0.280395	-0.160142	0.438349	0.100365	0.171772	0.340327	-0.01855	-0.003287	-0.039933	-0.053912	0.170304	0.213339	0.404477	-0.197788	0.210948	-0.271473	-0.019789	-0.0576	0.369478	-0.080133	-0.241552	0.275807		8	5
RP11-40M23	3	105180932	105347897	0.3263	-0.181062	-0.051491	0.04655	0.109834	0.044915	0.333505	0.549188	-0.463514	-0.047248	-0.060162	0.074399	-0.249505	0.452397	0.166086	0.097094	0.24137	-0.229116	0.00725	0.006056	-0.167807	0.090839	0.211171	0.562062	-0.201056	0.177393	-0.321204	-0.099839	-0.028455	0.313259	-0.145428	-0.327065	0.141421		8	5
RP11-115B22	3	105815245	105971443	0.3246	-0.113584	-0.066354	0.036428	0.161436	-0.077091	0.280203	0.576126	-0.184958	0.266899	0.265686	0.239021	0.011613	0.414559	0.0217346	0.079681	0.190455	-0.236828	0.087801	0.00989922	-0.121131	0.047486	0.11825	0.40179	-0.186788	0.13689	-0.187939	-0.02118	0.017037	0.232136	-0.081522	-0.132351	0.162899		8	5
RP11-91B3	3	106786819	106966498	0.496455	0.254555	-0.110492	0.211128	-0.009384	-0.049507	0.320115	0.085641	-0.466056	-0.064197	-0.080234	0.211681	-0.055016	0.202418	0.130042	0.117362	0.206288	0.145346	0.130412	0.272455	-0.033702	0.077104	0.177655	0.414467	-0.292622	0.177042	-0.0501193	-0.048256	-0.065002	0.290365	0.0507089	0.331168	-0.120899		9	5
RP11-20N7	3	107633520	107818033	0.45794	-0.04725	-0.21279	0.037812	0.103139	-0.085204	0.217049	0.257092	-0.480416	-0.274335	-0.192385	0.110368	-0.148367	0.548453	-0.01916	-0.040622	0.185956	-0.049109	-0.038147	-0.06425	-0.144804	0.179756	0.144687	0.106157	-0.478306	0.094609	-0.109509	-0.102707	-0.047122	0.017889	-0.085833	-0.423839	0.053108		8	5
RP11-561O4	3	108272967	108465288	0.215029	-0.027984	-0.071384	-0.007113	0.213613	0.0066099	0.334807	0.386058	-0.449775	0.11273	-0.016119	0.030976	-0.090885	0.31269	0.266928	0.085163	0.131646	-0.059134	-0.101623	0.00747244	-0.097561	0.001085	0.106972	0.39904	-0.315457	0.098761	-0.227884	-0.05402	0.039516	0.181805	-0.142476	-0.32052	0.170186		8	5
RP11-25F15	3	109236225	109385450	0.294414	-0.010239	-0.231002	-0.051453	0.108336	0.130423	0.227706	0.398193	-0.549367	0.021441	-0.021421	0.042262	0.087879	0.28743	0.056648	-0.009425	0.117933	-0.022532	-0.17436	0.081415	0.002618	-0.024673	0.173463	0.399588	-0.211715	0.098051	-0.01849	0.055415	-0.014967	0.122157	-0.120102	-0.195134	-0.003608		8	5
RP11-93N14	3	110118060	110272409	0.136477	-0.256447	-0.363848	-0.259968	-0.261447	0.179157	0.053074	0.048166	-0.233644	-0.135723	0.255705	-0.062577	-0.163342	0.070874	-0.127458	-0.129778	-0.103109	-0.189545	-0.061603	-0.034811	0.064898	-0.035698	0.043112	-0.020021	0.056156	-0.065858	0.046701	0.041882	-0.020239	-0.177604	0.112294	-0.263198	-0.075822		8	5
RP11-286P15	3	111576106	111691384	0.241827	-0.293338	-0.082751	0.0018	0.286925	0.083196	0.221238	0.411961	-0.457622	-0.141173	-0.017664	0.039528	-0.113506	0.391347	0.071968	0.023274	0.115661	-0.319845	-0.041295	-0.040993	-0.175327	-0.046296	0.142091	0.372177	-0.278141	0.108543	-0.039621	-0.092541	0.010157	0.19774	-0.083348	-0.499351	0.015276		8	4
RP11-553A10	3	112059456	112226454	0.179136	-0.118946	-0.208202	-0.123681	-0.02482	0.114939	0.194045	0.313608	-0.43911	-0.022871	-0.237333	-0.00882517	0.058957	0.33981	-0.001769	-0.023566	0.153659	-0.261121	-0.060475	-0.140104	-0.136711	-0.004977	0.176585	0.411544	-0.315023	0.060497	-0.09257	-0.096879	0.020838	0.265734	-0.150166	-0.344139	-0.112191		8	5
RP11-572C15	3	113764648	113980366	0.0896586	0.151767	-0.157178	0.015153	0.168098	0.084339	0.330064	0.458928	-0.613977	-0.084509	-0.276456	0.053007	0.090991	0.530056	-0.04876	0.147855	0.175467	-0.0147197	-0.059677	0.046674	-0.003552	0.02664	0.35261	0.503653	-0.187407	0.0815024	-0.0893403	0.156797	-0.0100489	0.195671	-0.0945075	1.90761	-0.029175		9	5
RP11-107J18	3	113978071	113984070	-0.054576	-0.047223	-0.228152	-0.072429	0.124023	-0.10342	0.070692	0.339562	-0.553186	-0.025351	-0.4065	0.095052	-0.194285	0.197661	0.084663	0.072073	-0.056196	0.075696	0.170004	0.005733	0.008999	-0.162979	0.032753	0.200765	-0.373589	0.002108	-0.038386	-0.129346	0.025316	0.020519	-0.16431	0.0903028	-0.080231		10	5
RP11-239J2	3	114747398	114895031	0.227533	-0.117747	-0.170316	-0.12745	0.065505	0.039109	0.206902	0.420401	-0.653072	0.04251	-0.343281	0.092576	-0.135857	0.366445	-0.031893	0.030881	0.105556	-0.188766	0.352993	0.024195	-0.191738	-0.091601	0.196525	0.35759	-0.350215	0.087811	-0.138956	0.084887	-0.024344	0.086486	-0.123557	1.85394	-0.059055		10	5
RP11-44J2	3	115539059	115697740	0.316813	-0.0793894	-0.253374	-0.0247735	0.150533	-0.0542486	0.421994	0.528486	-0.46799	-0.134443	-0.127468	0.083159	-0.112862	0.313627	0.033245	0.08486	0.2177	-0.099948	0.295325	-0.03528	-0.168738	-0.038276	0.130775	0.386205	-0.373905	0.17012	-0.145429	-0.141136	0.06734	0.200588	-0.132293	1.83732	0.0550998		10	5
RP11-58D2	3	116288762	116400887	0.299168	-0.230197	-0.17191	-0.004869	0.124176	-0.03543	0.327664	0.528489	-0.470113	-0.037097	-0.138131	0.036475	-0.085583	0.405221	0.030953	0.085297	0.242163	-0.239075	0.290352	-0.018236	-0.153282	0.095584	0.212477	0.43863	-0.240744	0.190658	-0.104085	-0.024049	-0.017375	0.209646	-0.148938	1.75527	0.097348		10	5
RP11-249J17	3	117048246	117110595	0.146852	-0.269959	-0.273824	-0.163233	0.164797	-0.052548	0.120642	0.393143	-0.529179	-0.160889	-0.212714	-0.045793	-0.16949	0.217502	0.06001	-0.044204	0.049994	-0.263433	0.264392	0.051455	-0.022647	-0.148584	0.058235	0.235004	-0.288282	0.034909	-0.080074	-0.054399	-0.022651	0.07713	-0.208802	1.69622	-0.013595		10	5
RP11-324H4	3	118153862	118326556	-0.121587	0.014885	-0.188291	0.043309	0.1867	-0.019577	0.35338	0.508576	-0.728366	-0.158513	-0.432011	0.126031	-0.252897	0.559219	-0.478161	0.045838	0.206196	0.062713	0.22533	0.067846	-0.031961	0.090228	0.377813	0.445287	-0.139004	0.157785	-0.120613	0.028534	0.068923	0.201987	-0.060948	1.34691	0.010607		9	6
RP11-165B13	3	119084438	119158437	0.112752	-0.168309	-0.246246	-0.047682	0.114857	-0.053567	0.296461	0.451855	-0.512337	-0.079839	-0.41895	0.153834	-0.226478	0.330721	-0.358997	0.039653	0.223687	0.016643	0.176374	-0.013458	-0.126214	0.044382	0.171013	0.529427	-0.264915	0.108606	-0.147685	-0.072242	-0.01232	0.194134	-0.182224	1.30753	0.064451		9	6
RP4-635B5	3	120110923	120259376	0.026776	-0.21672	-0.132456	-0.154006	0.208695	-0.026422	0.107991	0.281724	-0.313788	-0.158904	-0.000677	0.006846	-0.136049	0.31181	-0.444152	0.016997	0.108556	-0.255066	0.366252	-0.019018	-0.162959	-0.072863	0.125878	0.306613	-0.251497	0.074217	-0.103336	-0.037346	0.011921	0.142557	-0.073813	-0.057495	-0.074624		8	6
RP11-73F12	3	121089567	121205100	-0.023677	-0.448029	-0.139608	-0.101425	-0.044774	-0.096968	0.167417	0.136752	-0.520783	-0.282343	-0.111945	0.113692	-0.195251	0.208079	-0.36011	-0.067469	0.216242	-0.077085	0.353285	-0.071015	-0.094987	-0.00576	-0.017081	0.189193	-0.322417	0.099693	-0.035156	0.049018	-0.055188	0.136056	-0.055415	-0.171865	-0.261696		8	6
RP11-767L7	3	121148320	121326513	0.004151	-0.094077	-0.173699	-0.025719	-0.125023	0.014681	0.242676	0.492114	-0.39182	-0.025251	0.027201	-0.067917	-0.04931	0.295439	-0.372409	0.004098	0.203384	0.180313	0.326279	-0.056091	-0.122269	0.008655	0.136246	0.337774	-0.214145	0.12838	-0.185015	0.040023	-0.020851	0.267892	-0.156933	0.0534	0.036187		8	6
RP11-359H3	3	121651165	121848108	-0.080097	-0.153059	-0.272441	-0.124843	-0.064955	-0.087922	0.197738	0.353667	-0.533027	-0.046322	-0.02824	-0.013584	-0.057005	0.266947	-0.38652	0.009122	0.043906	0.246696	0.281888	0.000318	-0.13356	-0.118254	0.059311	0.256774	-0.347083	0.009588	-0.214659	0.03328	-0.059279	0.127744	-0.143211	-0.077637	0.126862		8	6
RP11-480B17	3	122378928	122541240	0.034733	-0.233741	-0.138289	-0.09342	-0.105806	-0.092514	0.270161	0.446175	-0.395958	-0.213179	0.003108	0.172404	-0.181632	0.24401	-0.292818	0.026522	0.189027	0.030681	0.287257	-0.020215	-0.095894	0.012912	0.143837	0.325651	-0.162982	0.097483	-0.114223	-0.015024	-0.067476	0.189636	-0.222873	0.118295	0.011907		8	6
RP11-299J3	3	123486719	123658121	0.100911	0.05378	-0.308416	-0.234034	0.513618	-0.074247	0.114724	0.319884	-0.666566	-0.264756	0.025296	-0.080742	-0.116686	0.247376	-0.461958	-0.01492	-0.063142	0.212726	0.273061	0.154899	0.01932	-0.124879	0.051745	0.194642	-0.296986	-0.048796	0.136023	0.051415	0.05815	0.036736	-0.070431	-0.006378	0.029541		8	6
RP11-457E6	3	123899748	124000616	0.041089	0.285489	-0.159316	-0.108907	0.389352	-0.006637	0.2298	0.467916	-0.539189	-0.078519	0.028976	0.035383	-0.036618	0.298586	-0.528024	-0.011728	0.105996	0.274507	0.267317	0.043509	-0.047346	0.049451	0.144779	0.363542	-0.221121	0.098426	0.05465	0.10452	0.011259	0.157329	-0.077283	0.098993	-0.019188		9	6
RP11-9N20	3	124853435	125034608	-0.227831	-0.027885	-0.337518	-0.228428	0.35597	0.018512	0.064905	0.26952	-0.513491	0.037908	-0.328431	-0.076394	-0.006287	0.094026	-0.408149	-0.02516	-0.005998	0.071023	0.288664	0.130591	-0.070753	-0.290147	0.0525	0.159984	-0.282993	-0.102764	0.063372	-0.076222	0.057352	0.027851	-0.162168	-0.01415	0.074921		9	6
RP11-521J5	3	125236904	125434263	-0.158571	0.072919	-0.228792	-0.047959	0.537853	0.004098	0.127693	0.32677	-0.484325	-0.056182	-0.357257	0.016555	-0.227373	0.139725	-0.385759	0.056722	0.016525	0.209791	0.245649	0.016794	-0.022692	-0.118264	0.054731	0.180166	-0.406923	0.016319	0.120395	-0.117066	0.006701	0.069378	-0.125607	0.015406	-0.140972		9	6
RP11-71H17	3	125910478	126076548	-0.04992	0.355185	-0.190824	-0.115106	0.321064	0.040008	0.129968	0.282307	-0.502817	0.052937	-0.414491	-0.063416	0.032038	0.276592	-0.298155	0.013974	0.033985	0.089881	0.257328	0.014802	0.045119	-0.106399	0.158429	0.189957	-0.282157	-0.004581	0.066877	0.036457	0.02329	0.069561	-0.080307	0.150102	0.059289		9	6
RP11-205A6	3	127432277	127483277	-0.013698	0.410153	-0.173905	0.001487	0.289384	0.107964	0.197364	0.25172	-0.325322	0.020079	-0.341057	0.058345	-0.06856	0.201781	-0.325193	0.053055	0.174326	0.248053	0.22617	-0.0253	0.003743	-0.010428	0.094309	0.252712	-0.122542	0.067299	0.028948	-0.085692	-0.046947	0.122625	-0.163622	-0.056603	0.12114		9	6
RP11-321A2	3	127985695	128108628	-0.221671	0.324098	-0.493438	-0.336115	0.111238	0.041377	-0.00426	0.139804	-0.620889	-0.026818	-0.383862	-0.200336	-0.057141	-0.045136	-0.623107	-0.063687	-0.167911	0.208221	0.251352	0.071802	0.099061	-0.129861	0.08834	0.154192	-0.438157	-0.050284	0.271474	0.014534	0.045543	-0.065319	-0.180454	0.064839	0.040101		9	6
RP11-59J16	3	128599468	128752054	-0.203655	-0.540135	-0.315811	-0.374197	0.028299	0.054023	-0.08028	0.215122	-0.30675	-0.015676	-0.468627	0.006462	-0.078443	-0.03749	0.302909	-0.074333	-0.105618	-0.165276	0.211919	-0.014713	-0.00584	-0.229968	-0.0168	-0.000132	-0.291016	-0.087686	-0.030426	-0.111626	0.002371	-0.024475	-0.236265	0.019354	0.093978		8	7
RP11-475N22	3	129634296	129803878	-0.283615	-0.225735	-0.310139	-0.212343	0.128857	0.142889	0.02433	0.212227	-0.466709	0.131128	-0.349861	-0.152233	0.074411	-0.006181	-0.426657	0.024218	-0.05772	0.23965	0.263994	0.056364	0.206532	-0.278588	0.021829	0.129099	-0.276042	-0.046249	0.026148	0.030167	0.029214	-0.040322	-0.165885	0.336534	0.0582143		9	7
RP11-221E20	3	129991755	130058439	-0.165252	-0.20753	-0.212726	-0.137259	0.104907	0.042896	0.11351	0.195308	-0.251372	-0.077855	-0.33697	-0.013409	0.060286	0.072917	-0.219815	0.007553	0.056086	0.118514	0.175428	-0.042941	0.127344	-0.127306	0.072188	0.215285	-0.255111	0.017231	0.13413	0.093748	-0.044147	-0.036025	-0.14078	-0.048856	-0.021768		9	7
RP11-129J11	3	131457232	131616365	-0.045375	-0.152253	-0.144557	-0.241081	0.215093	0.04541	0.179047	0.465666	-0.490826	-0.0997291	-0.301809	0.0531513	-0.074709	0.29827	-0.199388	0.072933	0.032529	-0.064175	0.458564	-0.090879	-0.079966	-0.0641016	0.118857	0.261602	-0.308906	0.075728	-0.082858	-0.028906	0.056411	0.205495	-0.074609	0.243579	0.136446		9	7
RP11-21N8	3	131810701	131810927	-0.028935	-0.209723	-0.257634	-0.067267	0.200659	-0.082465	0.279794	0.44819	-0.485154	-0.125644	-0.42572	0.088725	-0.168486	0.269821	0.082939	0.071564	0.054498	0.131298	0.288921	0.042524	-0.002815	-0.070472	0.142439	0.256929	-0.282691	0.109325	-0.039218	-0.038844	-0.051389	0.183955	-0.178425	-0.006999	-0.072788		9	7
RP11-517B11	3	132613095	132784656	-0.129051	-0.169425	-0.299228	-0.083115	0.078655	-0.089043	0.163104	0.376082	-0.345631	-0.06325	-0.43849	0.064514	-0.115088	0.152949	-0.255386	0.005099	0.021328	0.069501	0.249868	-0.014881	-0.021021	-0.121305	0.104447	0.119739	-0.295	0.04812	0.074864	-0.052464	-0.002998	0.035005	-0.24196	0.012878	0.072533		9	7
RP11-48F15	3	133822607	133959239	0.126719	0.028252	-0.208893	-0.038333	0.148767	0.184517	0.414182	0.520535	-0.531486	-0.0799431	-0.277075	0.215029	-0.01838	0.404796	-0.342568	0.012002	0.127238	0.280683	0.314269	0.046052	0.023757	0.190388	0.120498	0.495913	-0.189842	0.187707	0.110355	0.105822	-0.006909	0.354231	-0.048427	0.215092	0.029337		9	6
RP11-91K8	3	134620122	134771767	0.08093	-0.333142	-0.306662	-0.030297	-0.117395	0.018678	0.002554	-0.026543	-0.11497	-0.007268	-0.0811308	-0.045367	-0.059898	0.277169	-0.123084	-0.035479	-0.029742	-0.023	0.087318	-0.086312	0.00964	0.134787	0.037093	0.03517	-0.166759	0.001223	0.109633	0.043588	-0.071706	-0.199212	-0.025095	-0.13975	0.790874		9	6
RP11-22E12	3	135843628	136012659	-0.191586	0.2654	-0.308182	-0.139869	0.199701	0.042392	0.181636	0.354014	-0.561117	0.091006	-0.482481	0.019214	-0.112902	0.141163	-0.505442	0.008484	-0.140972	0.114178	0.232625	0.015496	0.02938	-0.279687	-0.010316	0.202321	-0.372742	-0.029107	-0.008912	-0.073271	-0.034887	0.035754	-0.229719	0.372852	0.18186		10	6
RP11-91O5	3	136539154	136692414	-0.072507	0.343399	0.31665	0.10995	-0.062038	-0.004279	0.196804	0.300057	-0.562273	-0.300425	-0.246301	0.105302	-0.137951	0.348804	0.259981	0.071165	0.043648	0.020099	0.300596	-0.18752	-0.015943	-0.080461	0.124505	0.327291	-0.085889	0.023183	0.004036	-0.074863	-0.077423	0.092804	-0.150798	0.402204	0.275366		10	6
RP11-311K2	3	137747916	137748620	0.129183	0.531698	-0.060193	-0.076007	0.199861	-0.030789	0.248957	0.433855	-0.319052	-0.089086	-0.145652	0.020132	-0.097863	0.268229	-0.222753	0.067532	0.025954	0.011161	0.303211	-0.048012	0.040788	-0.0047	0.16651	0.39732	-0.213749	0.167085	0.063904	0.140602	0.025367	0.21939	0.013165	0.254545	0.108205		10	6
RP11-197K1	3	137845270	137888020	0.200068	0.464106	-0.115952	-0.137481	0.138955	-0.008957	0.146029	0.355377	-0.582719	-0.143788	-0.242627	0.0774483	-0.146352	0.425736	-0.41791	0.097332	-0.061582	-0.059443	0.34711	0.100369	-0.078387	-0.012732	0.166959	0.31077	-0.281128	0.010273	-0.046987	0.167978	-0.057804	0.112789	-0.074674	0.334409	0.117259		10	6
RP11-269A14	3	138231898	138416938	-0.114997	0.119025	-0.317132	-0.142658	0.277802	-0.010449	0.187555	0.348438	-0.451122	-0.030704	-0.44244	-0.044053	-0.262486	0.217823	-0.453753	-0.105464	-0.032685	0.054873	0.233462	0.005644	-0.038118	-0.199537	-0.037023	0.219831	-0.369614	0.060902	-0.071398	-0.022859	-0.021131	0.0364	-0.230844	0.309293	0.095431		10	6
RP11-2A4	3	138893131	139048151	-0.064595	0.020923	-0.094849	-0.203738	-0.076486	0.186229	0.0763	0.173042	-0.350034	-0.0793433	-0.171551	0.0200302	-0.17041	0.32908	-0.393447	0.0649	-0.091846	-0.100382	0.324367	-0.057602	-0.043551	-0.025106	0.102859	0.000914	-0.433871	0.041538	-0.193931	0.050656	-0.010279	0.029795	-0.108714	0.103777	0.049069		10	6
RP11-349D24	3	140626767	140627384	-0.196014	0.074859	-0.342806	-0.192584	0.107016	0.099555	0.120226	0.169877	-0.598599	-0.055225	-0.436426	-0.012038	-0.18811	0.159508	-0.093453	-0.051553	-0.166744	0.085161	0.257069	0.077811	-0.006801	-0.246736	0.103333	0.154996	-0.357557	-0.042109	0.012321	0.00712	0.018368	0.050742	-0.195148	0.008628	-0.038807		10	5
RP11-89E16	3	141263363	141441462	-0.024548	-0.380863	-0.37569	-0.156579	0.109547	0.054723	0.116826	0.211082	-0.529963	-0.103324	-0.441879	-0.11914	-0.263899	0.134084	0.00494	-0.055312	-0.004186	-0.117323	0.103044	-0.051213	-0.13693	-0.215775	-0.042657	0.133341	-0.451687	-0.029481	0.031967	-0.135713	-0.015894	-0.138881	-0.233476	0.987075	0.126524		10	5
RP11-231L11	3	142172417	142328314	-0.004893	0.0980764	-0.283442	-0.201135	0.099195	0.007464	0.162242	0.184359	-0.582198	-0.025807	0.599136	0.260311	-0.129421	0.350091	0.493775	0.127345	0.029682	0.226167	0.2398	0.350023	-0.010726	-0.09078	0.137324	0.480519	-0.287197	0.193507	0.274704	0.024674	0.311336	0.583303	0.248911	0.136808	0.110698		10	5
RP11-235I18	3	143078423	143237521	-0.002201	0.521888	-0.150838	-0.064683	0.08942	0.10329	0.323325	0.383787	-0.42011	0.0966025	-0.311677	0.105569	0.045193	0.268932	0.098535	0.042332	0.133379	0.341975	0.267919	0.04655	0.080994	0.032818	0.125663	0.382495	-0.109436	0.129336	0.278727	0.259808	0.040829	0.152209	0.688746	0.200877	0.0116148		10	5
RP11-160A13	3	144154889	144312261	0.065431	0.226082	-0.178655	-0.000741	-0.043478	-0.145239	0.255582	0.505433	-0.392958	0.149672	-0.444473	0.137771	0.040481	0.344601	0.010766	0.082405	0.183207	0.080325	0.286823	-0.022318	0.046862	0.003909	0.109908	0.386869	-0.287951	0.130892	0.018561	-0.009055	-0.00255	0.223539	0.07465	0.190596	0.248494		9	5
RP11-165M11	3	144846148	144912579	-0.053815	0.270556	-0.29142	-0.221644	-0.20565	-0.087151	0.172216	0.418204	-0.448946	-0.0619231	-0.325962	0.021585	-0.123337	0.114982	0.010414	-0.016537	-0.047668	0.079736	0.233594	0.080029	0.078603	-0.057792	0.144059	0.236415	-0.297226	0.010761	0.082157	0.038274	-0.009467	0.110419	0.068666	0.42407	0.029913		9	5
RP1-38G8	3	145241201	145382433	-0.024252	0.234738	-0.318637	-0.22011	-0.225444	0.004159	0.156055	0.426021	-0.61817	0.027282	-0.35956	0.035629	-0.209058	0.262542	-0.054315	-0.026227	-0.057757	0.050487	0.275598	0.020567	0.039469	-0.043826	0.24222	0.273051	-0.296653	0.107238	0.088619	0.050947	0.03469	0.127019	0.072566	0.480894	-0.068821		9	5
RP11-200O17	3	145885191	146013690	-0.005144	0.266817	-0.07629	-0.007935	-0.134778	-0.023306	0.377505	0.412062	-0.365371	-0.104328	-0.451064	0.0971982	-0.196752	0.244577	0.048042	0.025304	0.0493202	0.008418	0.268701	-0.026352	-0.102832	0.112093	0.262444	0.451139	-0.202133	0.195032	0.05216	0.045553	-0.027011	0.179757	-0.197564	0.31556	0.129978		9	5
RP11-88H10	3	147011375	147184830	0.061308	0.158213	0.263465	0.028098	-0.1611	0.057555	0.03195	0.177188	-0.476011	-0.128323	-0.218107	0.0844881	-0.109166	0.37183	0.291032	-0.004215	-0.043092	-0.206233	0.292257	-0.164089	-0.073812	-0.02123	0.119682	0.199819	-0.182691	0.053615	-0.433228	0.006852	-0.043572	-0.230026	-0.09346	0.032183	0.168721		9	5
RP11-21M4	3	147710171	147710643	0.02138	0.483912	-0.133418	0.073567	-0.077124	0.030281	0.332988	0.411599	-0.303414	0.074263	-0.375649	0.22161	0.177764	0.274001	0.116479	0.052433	0.187776	0.230952	0.393963	0.048908	0.089822	0.095304	0.252991	0.447857	-0.127131	0.190583	0.09943	0.110696	-0.020463	0.257973	-0.060745	0.337466	0.075136		9	4
RP11-345O2	3	149511885	149686933	0.041861	0.088978	-0.187863	-0.12022	-0.131802	0.001742	0.269407	0.471874	-0.479643	-0.108315	-0.478379	0.090603	-0.24489	0.379012	-0.019106	0.016405	0.06893	-0.08845	0.350467	-0.051409	-0.014986	0.032011	0.166546	0.300029	-0.273951	0.151728	-0.077799	0.111338	0.008202	0.215506	-0.170268	-0.012281	0.083721		9	3
RP11-268J1	3	150340159	150506783	-0.160234	0.066425	-0.101538	0.142032	-0.205784	-0.029724	0.112849	0.399258	-0.067333	-0.049666	0.525101	-0.003874	0.00389	0.236192	0.032011	-0.034568	0.122687	-0.051734	0.242821	-0.153783	0.088353	0.167387	0.101017	0.213755	-0.304462	0.033675	-0.199889	-0.027003	-0.110264	0.167003	-0.123249	-0.106066	-0.026695		11	3
RP11-145F16	3	151508475	151678835	0.076509	0.427714	-0.169785	0.200062	-0.024577	-0.024231	0.359074	0.503031	-0.494613	0.159418	0.982183	0.101158	0.002812	0.349221	-0.0254974	-0.014072	0.026381	0.249111	0.364904	0.087233	0.116635	0.124676	0.170277	0.227232	-0.284306	0.061192	0.005686	0.073386	0.045157	0.252894	-0.009942	0.388343	0.0228593		11	3
RP11-251C9	3	152100280	152279776	-0.128768	0.080269	-0.312307	0.135618	0.082947	-0.010559	0.169068	0.329747	-0.354976	-0.090297	0.789479	-0.007697	-0.065077	0.159741	0.05924	0.034599	-0.06782	0.149816	0.240819	0.059321	0.100023	-0.088375	0.138488	0.105252	-0.375832	0.018603	0.101591	0.011062	-0.021045	0.072685	-0.170559	0.129455	0.133456		11	3
RP11-3F11	3	153000409	153170597	-0.034115	-0.015016	-0.24768	0.133396	-0.038124	-0.103013	0.220866	0.470682	-0.357384	-0.201567	-0.327978	0.177788	0.073934	0.094103	0.039238	0.031847	0.068577	0.034362	0.239775	0.014082	0.136497	-0.010727	0.08535	0.251383	-0.340868	0.054018	0.038774	0.04253	-0.000249	0.159032	-0.139226	-0.0169	-0.247085		11	3
RP11-30J14	3	153144942	153314616	0.109776	0.297048	-0.139381	0.327213	-0.007711	0.071483	0.331178	0.518672	-0.503965	-0.0193638	-0.018587	0.107196	0.008927	0.304206	0.126844	0.132479	0.122188	0.157265	0.297268	-0.03013	0.078337	0.006707	0.064969	0.358402	-0.267318	0.157834	0.024403	0.022126	0.06107	0.184884	-0.031806	0.103295	0.0362447		11	3
RP11-64O13	3	153173968	153322742	0.023793	0.440907	-0.17511	0.19635	-0.152046	0.198616	0.317561	0.400263	-0.408715	0.072221	0.265556	0.11715	0.09483	0.28139	0.179569	-0.038347	0.012733	0.240167	0.324628	0.0540129	0.056025	0.15459	0.211107	0.413844	-0.131407	0.096175	0.205424	0.085108	0.027052	0.214001	0.012083	0.3329	0.105368		11	3
RP11-362A9	3	153502275	153697704	0.149408	0.276343	-0.108267	0.287908	-0.066859	0.010367	0.310688	0.499721	-0.417	-0.051965	0.719228	0.107734	0.012578	0.382915	0.028284	-0.032054	0.149403	0.06492	0.331245	-0.034543	0.101602	0.143776	0.194489	0.466045	-0.135494	0.153921	-0.051943	0.127436	-0.009021	0.212652	0.091712	0.177396	-0.106251		11	4
RP11-240G5	3	153771217	153915216	-0.0251082	0.102151	-0.185443	0.177487	0.008744	-0.077524	0.102992	0.325506	-0.297801	-0.066003	0.891716	0.0423342	-0.105813	0.246184	0.13927	-0.013756	-0.073408	-0.0566619	0.387569	0.082003	-0.047956	-0.147189	0.090607	0.169721	-0.236727	0.0749606	0.0836951	-0.015332	-0.0256996	0.114935	-0.124806	-0.006564	-0.24377		10	4
RP11-529G21	3	154238290	154238746	0.031968	-0.128589	0.005695	0.031501	0.038665	0.186551	0.18184	0.306478	-0.165479	-0.245993	0.28813	-0.103402	0.035167	0.154266	0.509701	-0.012708	0.026037	-0.037345	0.053622	0.001187	-0.06757	0.118669	0.073906	0.477525	-0.163097	0.066617	0.052313	0.093432	0.032326	0.645015	-0.171145	-0.035449	-0.186014		9	4
RP11-223L18	3	154955759	155086900	-0.075703	-0.112953	-0.170865	0.189113	0.070843	-0.019074	0.21469	0.36202	-0.135259	-0.231628	0.154733	-0.000274	-0.210018	0.185645	-0.203209	0.027378	0.107753	-0.004551	0.238171	-0.087934	-0.005316	-0.000929	0.128441	0.326882	-0.230453	0.092583	0.124773	-0.00638	-0.004273	0.059573	-0.09706	-0.050343	-0.193347		9	4
RP11-117L15	3	156642070	156810063	-0.172278	-0.045979	-0.203592	0.072464	0.176141	0.008055	0.182804	0.324106	-0.300788	0.062069	-0.189886	-0.088508	-0.055009	0.27171	-0.202259	-0.0106712	-0.062683	-0.162137	0.323079	-0.080925	0.024948	-0.21817	0.025953	0.221393	-0.085925	0.078002	-0.213211	0.040095	-0.004344	0.08023	-0.002614	0.294915	-0.0586445		8	4
RP11-111F10	3	157113247	157286199	-0.113486	-0.029834	-0.073395	-0.117045	-0.114872	0.0156	0.036731	0.072972	-0.23016	-0.125429	0.098525	-0.189441	0.039169	0.179018	0.15997	-0.055938	-0.153411	0.099996	0.072684	0.000505	0.077951	-0.155102	0.189513	0.104372	-0.17678	-0.00998	0.187029	0.172983	0.014873	0.013572	0.123118	-0.417653	-0.105685		8	4
RP11-6F2	3	158175803	158323322	0.104062	-0.485607	-0.270896	0.087294	0.092177	-0.035956	-0.008269	0.075832	-0.372581	-0.055621	-0.165652	-0.20898	-0.098913	0.150436	0.018171	0.036281	-0.021182	-0.135362	0.45338	-0.1213	0.007673	-0.130068	-0.059498	0.161291	-0.065729	0.012473	-0.023682	-0.018067	0.007194	0.027587	-0.132909	-0.079681	-0.265103		8	5
RP11-90N21	3	158817699	158979205	0.064922	-0.010361	-0.042649	0.023288	-0.15322	0.054094	0.004692	0.244432	-0.181204	-0.190017	-0.080694	0.097752	-0.165815	0.176993	0.034291	0.070601	0.080375	0.043379	0.184863	-0.209104	0.056329	-0.095405	0.166296	0.184666	-0.275094	0.071402	-0.032109	0.082499	-0.05946	0.042685	-0.05249	-0.109375	-0.0287226		8	5
RP11-538P18	3	159590746	159779804	0.002662	-0.297495	-0.20464	0.126119	0.099629	-0.014035	0.175396	0.402629	-0.244879	-0.099622	-0.275205	0.043621	-0.228662	0.231642	0.111926	0.046325	0.065401	-0.339411	0.286173	-0.083278	-0.040917	-0.019879	-0.056766	0.254089	-0.178331	0.057711	-0.023596	-0.067442	-0.048027	0.097169	-0.167538	-0.009441	-0.146459		8	6
RP11-209H21	3	160726512	160903014	-0.12285	-0.271674	-0.343748	0.101142	0.06162	-0.048395	0.132	0.322384	-0.500068	-0.120261	-0.389721	0.119699	-0.245951	0.050318	-0.014456	-0.074614	-0.042615	-0.322865	0.207803	-0.035025	0.040513	-0.144204	-0.11318	0.171119	-0.225365	0.030447	0.235963	0.030338	0.000398	0.000574	-0.253875	0.02875	-0.283411		8	6
CTD-2049J23	3	161081617	161238695	0.046575	0.084281	-0.134564	0.117823	0.11904	0.110287	0.185884	0.286748	-0.632426	0.027648	-0.179764	-0.01688	-0.113507	0.189095	-0.182754	-0.067914	-0.015849	-0.041042	0.399012	-0.054737	0.122508	0.014808	0.06654	0.214103	-0.140424	0.010997	-0.000337	0.170253	0.002802	0.092885	-0.005752	0.114948	-0.058811		8	6
RP11-67F24	3	161144707	161320814	-0.007223	-0.245822	-0.215777	0.054442	0.213321	-0.076314	0.089643	0.274739	-0.529207	-0.064482	-0.365709	-0.019884	-0.040888	0.16777	0.120938	-0.008874	-0.017225	-0.089023	0.229205	-0.013697	0.070161	-0.114919	-0.015883	0.270505	-0.232148	-0.037937	-0.017472	0.13204	0.02706	0.073874	-0.105291	0.238905	-0.144789		8	6
RP11-203L15	3	162044658	162207623	-0.062686	-0.340385	-0.225527	0.05738	0.112249	0.004542	0.088703	0.317711	-0.331396	-0.218735	-0.290431	0.030918	-0.197806	0.157367	0.084881	-0.01466	0.010258	-0.35432	0.193329	0.008465	0.001541	-0.118514	-0.041611	0.128695	-0.311192	0.012265	0.097499	-0.030834	-0.047258	-0.107434	-0.07394	-0.0707	-0.301439		9	5
RP11-498P15	3	163530331	163648101	-0.130628	-0.235707	-0.241776	0.26746	0.09557	-0.069587	0.26394	0.418452	-0.316475	-0.167917	-0.350762	0.165974	-0.12349	0.24164	0.03285	-0.021366	0.13414	-0.255029	0.178769	-0.111079	0.048145	0.00471	0.107268	0.276559	-0.076108	0.080628	0.030719	-0.027609	-0.086707	0.122754	-0.145627	0.339893	-0.292559		9	5
RP11-90M7	3	164366669	164516637	0.123261	-0.378722	1.3442	0.211553	-0.196465	-0.106856	0.143939	-0.161622	-0.117402	-0.294672	-0.222104	0.145588	-0.062554	0.313843	-0.072598	0.103365	0.186806	-0.035342	0.221658	-0.241618	-0.002193	0.090655	-0.028309	-0.054538	0.366719	0.075991	0.025917	0.014075	-0.022276	-0.022574	0.01558	0.252481	0.029978		9	5
RP11-198G24	3	165289730	165465059	-0.010115	0.272445	-0.166837	0.267205	0.087852	-0.0180219	0.287597	0.391152	-0.477371	-0.139585	0.123359	0.055037	-0.130255	0.319247	-0.433336	-0.001858	0.092394	-0.219901	0.260341	-0.043251	0.042369	0.057133	0.090826	0.411814	-0.203489	0.123885	0.160622	0.080343	-0.067864	0.090735	-0.143019	0.068238	-0.248477		9	6
RP11-12N13	3	167343050	167517660	0.121985	0.173474	-0.137558	0.166356	-0.003518	-0.067617	0.336796	0.429635	-0.554994	-0.356397	-0.382475	0.21537	-0.28037	0.398454	-0.205326	0.041029	0.200251	-0.191432	0.165751	-0.091042	0.012174	0.15549	0.127412	0.354052	-0.140775	0.134385	-0.034316	0.019986	-0.030868	-0.027799	-0.092735	-0.041203	-0.059738		9	6
RP11-264D7	3	168566880	168739939	0.051496	0.003972	-0.140122	0.16597	0.216093	-0.014009	0.22986	0.439326	-0.389701	-0.132468	-0.290504	-0.024052	-0.31443	0.323902	-0.436416	0.011065	0.123032	-0.357553	0.301493	-0.074653	-0.089874	-0.020058	0.057914	0.216907	0.011061	0.075074	-0.06555	-0.020244	-0.017022	0.071028	-0.178899	0.05737	-0.234196		9	6
RP11-141C22	3	170366532	170543983	-0.074406	0.171872	-0.262995	0.047155	0.190722	-0.018936	0.256248	0.542011	-0.462347	0.025088	-0.39796	-0.003604	-0.078191	0.223268	-0.214394	-0.013124	-0.030009	-0.393595	0.311661	0.025008	0.152544	-0.11733	-0.090447	0.288298	0.224188	-0.032309	-0.029004	0.068891	-0.07297	0.070971	-0.272659	0.217427	-0.0570971		8	6
RP11-3K16	3	170729336	170729903	0.116827	-0.232016	-0.158773	0.0256697	0.027609	-0.0128676	0.0750834	0.238424	-0.19593	-0.063638	-0.298163	0.0682346	-0.09393	0.253252	-0.222002	0.025347	0.137136	-0.224552	0.21856	-0.105657	-0.139989	0.159498	-0.027088	0.163744	-0.264386	0.08243	0.13048	-0.013969	0.031632	-0.091835	-0.027543	-0.176461	-0.00875133		8	6
RP11-484I19	3	172293484	172503082	0.140725	0.358117	-0.257861	0.158622	-0.020925	0.014317	0.221729	0.432777	-0.736479	-0.155039	-0.130464	-0.00228	-0.093826	0.251823	-0.178474	0.027212	-0.03261	-0.231078	0.336427	0.117809	0.136043	-0.098378	0.10083	0.248907	-0.049183	0.051916	0.143372	0.10392	-0.0048	0.006216	-0.145113	-0.204037	-0.149935		8	6
RP11-163H6	3	173181505	173348034	-0.040248	0.353718	-0.143636	0.274737	0.169458	0.052307	0.264541	0.477989	-0.402271	0.094024	-0.378439	0.072157	0.35561	0.272259	0.083343	0.082832	0.117329	-0.202189	0.317016	0.062303	0.201253	0.047018	0.067707	0.34541	-0.127893	0.064278	-0.040561	0.287218	-0.00153	0.182039	-0.078901	0.124168	-0.006942		8	6
RP11-44A1	3	173688024	173855773	-0.106789	0.349365	-0.085323	0.258744	0.155621	0.120127	0.225523	0.351373	-0.449483	0.064494	-0.219717	0.0841991	0.227264	0.368851	0.05901	0.014476	-0.006701	-0.285355	0.462701	0.018199	0.081885	0.025946	0.038539	0.324433	0.130439	0.005523	0.347662	0.234718	0.044679	0.143255	-0.058393	0.13986	-0.183745		8	5
RP11-569P10	3	174372444	174549475	0.02767	-0.190452	-0.255548	0.00292	0.117164	0.123911	0.193139	0.30326	-0.480214	0.009131	0.725266	0.092405	-0.17674	0.195103	0.005008	-0.004659	-0.04937	-0.114638	0.244759	-0.075866	0.064118	-0.067967	-0.118032	0.347935	-0.289355	-0.005436	-0.023747	0.049391	-0.037949	0.043623	-0.158238	0.239993	-0.053318		9	5
RP11-477P16	3	175307382	175497987	0.072694	0.012985	-0.100552	0.251273	0.178093	-0.036551	0.390482	0.433608	-0.499997	-0.085515	0.866322	0.176661	-0.13206	0.404675	0.125615	0.124945	0.213394	-0.136456	-0.026426	-0.008883	0.038068	0.091871	0.08395	0.505808	-0.204521	0.142158	-0.111777	0.115147	-0.011541	0.23844	-0.078865	0.207943	-0.119201		9	5
RP11-71G7	3	177684935	177849659	0.037391	-0.062631	-0.184608	0.290616	0.210342	0.00955512	0.36044	0.443928	-0.397167	0.039139	0.636193	0.051409	-0.065536	0.317687	-0.384601	0.005089	0.122684	-0.276216	0.552524	-0.085048	-0.045124	-0.03093	-0.051939	0.277282	-0.278554	0.087932	0.142806	0.089126	0.039326	0.145204	-0.191071	-0.487823	-0.217883		9	6
RP11-484D18	3	178148590	178318222	0.099148	-0.207006	-0.106709	0.220315	0.189268	-0.112232	0.278342	0.429299	-0.476181	-0.181066	0.69386	0.124668	-0.138552	0.363785	-0.445449	0.052023	0.122829	-0.15288	0.261775	-0.009463	0.122707	0.013793	0.070493	0.334097	-0.27745	0.095242	0.28898	0.211278	-0.061354	0.113106	-0.104407	-0.365863	-0.289656		9	6
RP11-91K9	3	178971545	179129183	-0.130489	-0.157313	-0.095617	0.004888	-0.047714	-0.096166	-0.028325	0.14118	0.673549	-0.054963	0.314642	0.061989	0.00719	0.112748	0.057043	0.009032	-0.036513	-0.096611	0.068379	-0.104412	0.045382	-0.159984	-0.061702	-0.026045	-0.398933	0.015941	0.22101	0.040457	0.010345	-0.051889	-0.048508	-0.180463	-0.191519		9	6
RP11-21C11	3	179511208	179653308	-0.047373	-0.066829	-0.126374	0.260042	0.069658	0.031156	0.303919	0.485391	-0.390167	0.052082	0.689759	0.068578	-0.059409	0.355383	-0.394928	-0.027576	0.166242	-0.292499	0.356434	-0.09077	0.028064	-0.001838	0.050273	0.31653	-0.227582	0.152881	0.33567	0.122524	-0.038018	0.151884	-0.17322	-0.489148	-0.244534		9	6
RP11-682A21	3	180293420	180449261	0.089089	-0.105067	-0.062374	0.173529	0.091505	0.057819	0.213206	0.377652	-0.459059	-0.193295	0.833544	0.0230321	-0.006842	0.415704	-0.527464	0.027146	0.072848	-0.353622	0.426476	0.014512	0.071195	0.101219	0.090523	0.301586	-0.288374	0.070323	0.329251	0.211759	-0.022605	0.132675	-0.058726	-0.510784	-0.237174		9	6
RP11-45I24	3	180867447	181028456	-0.088903	-0.21829	-0.220133	0.194695	-0.009392	-0.103393	0.210316	0.376659	-0.419047	-0.09377	0.731753	-0.0865	-0.098636	0.241092	-0.519221	0.035368	0.086035	-0.208551	0.231334	-0.089096	0.068932	-0.125187	-0.085922	0.286948	-0.357702	0.096216	0.301617	0.0707	-0.055527	0.013565	-0.184577	-0.560219	-0.33951		9	6
RP11-534H15	3	181435794	181436206	-0.178794	-0.351885	-0.286617	0.109151	0.036064	-0.025589	0.183285	0.422244	-0.330953	-0.238148	0.663732	0.039819	-0.25901	0.110198	-0.468214	-0.02943	0.019963	-0.450094	0.235278	-0.107312	0.077615	-0.06925	-0.022754	0.227807	-0.356977	0.03057	0.363066	0.041405	-0.029372	-0.036403	-0.279615	-0.527504	-0.268983		9	6
RP11-420J11	3	181453971	181647163	-0.030232	-0.338089	-0.194782	0.054359	0.067377	0.024101	0.147335	0.409097	-0.147712	-0.183351	0.649282	-0.012553	-0.204136	0.182197	-0.334547	-0.020606	0.143923	-0.391381	0.334563	-0.044322	0.078172	-0.049348	-0.045964	0.158505	-0.301555	0.083424	0.0491798	0.040085	0.041123	-0.026423	-0.15686	-0.326536	-0.218975		9	6
RP11-510K16	3	181728717	181786826	-0.106608	-0.225283	-0.028617	0.12168	0.086437	0.015191	0.166638	0.275707	-0.241815	-0.109074	0.470678	-0.050837	-0.14632	0.233612	-0.218691	-0.006076	0.048943	-0.199375	0.268931	-0.062767	-0.023644	-0.029834	-0.000245	0.295848	-0.313395	0.103143	0.302456	-0.015447	-0.004447	-0.022815	-0.091524	-0.486492	-0.119655		9	6
RP11-416O18	3	183174961	183353277	-0.038725	0.22908	-0.153488	0.181244	0.167948	0.054043	0.217307	0.426383	-0.469363	-0.0274869	1.50032	0.0121149	-0.189302	0.387278	-0.128346	0.018952	0.006076	-0.245495	0.467225	-0.0457003	-0.056214	-0.0133676	0.011404	0.311643	-0.514534	0.143799	0.309388	0.073918	0.023817	0.075049	-0.16511	-0.141349	-0.369884		9	6
RP11-553E4	3	184141436	184305425	0.019878	-0.13296	0.016547	0.108645	0.012379	0.191373	0.152512	0.237141	-0.432217	-0.115499	1.05805	-0.186735	-0.125836	0.425788	0.247274	-0.111318	0.020608	-0.264894	0.240457	-0.080889	-0.023956	0.046172	0.115685	0.397774	-0.35095	0.045095	0.199156	0.151301	-0.030912	0.129312	-0.15594	-0.367188	-0.178204		10	5
RP11-14I2	3	184802896	184994141	-0.109462	-0.14631	-0.183888	0.116512	0.133334	-0.048564	0.174672	0.380742	-0.380749	-0.074529	1.27782	-0.066377	-0.04034	0.250721	0.076507	0.02235	0.120802	-0.151311	0.289021	-0.037063	0.128845	-0.024626	0.0567	0.27718	-0.34099	0.084429	0.338596	0.240964	-0.024708	0.06055	-0.178239	-0.541934	-0.256158		10	5
RP11-110C15	3	186612235	186768130	-0.03543	0.102275	-0.037992	-0.048706	-0.07365	-0.184279	0.173267	-0.045594	0.382857	-0.0388	0.598501	0.114698	-0.04294	0.201673	0.363296	-0.110204	-0.008663	0.001259	0.092922	-0.08873	0.012689	-0.066858	0.003442	0.101738	-0.338026	-0.012237	0.261467	0.070171	-0.048323	0.03653	-0.053992	-0.51768	0.042832		10	5
RP11-65J14	3	187299599	187370253	-0.136751	0.106045	-0.362586	0.07326	0.098948	0.072689	0.11915	0.260418	-0.548402	0.029741	1.34471	-0.079318	0.060434	0.13611	-0.495799	-0.084468	-0.112187	-0.176738	0.224973	0.020326	0.123515	-0.120101	0.063328	0.183079	-0.299942	0.010105	0.69995	0.325052	0.058122	0.065257	-0.100509	0.200437	-0.262282		9	4
RP11-119E13	3	188090395	188091031	-0.162543	0.410385	-0.114947	0.191507	0.255153	-0.035994	0.283097	0.34339	-0.430477	0.121641	1.23881	0.110412	0.058975	0.299568	-0.0444679	0.056568	0.044629	-0.201601	0.25945	0.048816	0.150762	-0.026043	0.085054	0.367157	-0.23299	0.018544	0.36014	0.222523	0.008889	0.227978	0.0586759	0.207847	-0.032451		10	4
RP11-88P6	3	188693480	188860124	0.264061	-0.741956	-0.212858	0.241761	0.045249	0.051271	0.277596	-0.071602	-0.537399	-0.17233	0.524575	0.007391	-0.175252	0.066875	-0.202897	0.005657	-0.007911	0.002689	0.222713	-0.154156	-0.039432	-0.151361	-0.130761	0.109588	0.217019	0.046115	0.069664	-0.056773	-0.044247	0.035565	-0.167758	0.319274	0.0251379		10	5
RP11-178K17	3	190561334	190731939	-0.077966	-0.097199	0.020597	0.174418	-0.013233	0.0330453	0.189585	0.373248	-0.184715	-0.029473	0.277842	0.162587	-0.055379	0.245032	-0.015395	0.007376	0.081149	0.012073	0.182005	-0.049308	-0.0197	0.049332	-0.043781	0.175874	-0.233208	0.053928	0.302998	0.05892	-0.019414	0.167355	-0.098961	-0.018349	-0.0119808		9	5
RP11-211P13	3	191651342	191835544	-0.006088	-0.317506	-0.205194	0.23971	0.130627	0.15762	0.290548	0.256174	-0.700969	-0.073608	1.28146	0.179509	0.048864	0.332532	0.025336	0.0271	0.110021	-0.005489	0.217276	-0.105778	0.111936	0.074088	0.016248	0.349793	-0.446359	0.09622	0.745427	0.148403	-0.049689	0.040618	-0.131378	-0.41883	-0.256836		10	6
RP11-525C11	3	192498454	192584211	-0.070364	-0.304151	-0.385519	0.141157	0.092553	0.125218	0.268039	0.443932	-0.640516	-0.0650347	0.968478	0.063166	-0.086087	0.194455	0.044294	-0.093891	0.147876	-0.028227	0.152138	-0.082559	0.021598	0.075024	0.105745	0.457598	-0.354762	0.124211	0.605874	0.190485	-0.000254	0.202727	-0.08345	-0.306382	-0.182098		10	6
RP11-466I16	3	193387523	193550121	0.100071	-0.465741	0.006861	0.320603	0.167127	0.349137	0.265864	0.315552	-0.426683	0.152542	0.695127	-0.0739	-0.010771	0.443922	0.07655	0.15596	0.078164	-0.322287	0.501412	0.08715	0.064456	0.02707	0.212504	0.411182	-0.370072	0.146958	0.756154	0.130093	0.059161	0.196826	0.043504	-0.490508	-0.209939		10	6
RP11-47G2	3	193748172	193916452	-0.063714	-0.772376	-0.158217	0.110816	0.617846	0.137699	0.38782	0.37076	-0.505349	-0.010606	1.27229	0.0310153	-0.228196	0.318311	0.12432	0.085675	0.08711	-0.238114	0.239828	-0.04583	0.080115	-0.088799	-0.106647	0.306529	-0.377154	0.090121	-0.044835	-0.014776	0.005608	0.155785	-0.156569	-0.284893	-0.201646		10	6
RP11-56C4	3	193972707	194023821	0.045241	-0.733315	-0.182854	0.177579	0.625212	0.337649	0.11373	0.203956	-0.648259	-0.084718	1.42471	-0.09679	-0.160992	0.411648	0.034492	0.055666	-0.067212	-0.41086	0.309772	-0.009653	0.016466	-0.106334	0.007174	0.338312	-0.477195	0.025874	0.279903	0.05107	0.022708	0.130324	0.048015	-0.509378	-0.270728		10	6
RP11-279P10	3	195537806	195629792	-0.064554	-0.644315	-0.200184	0.188286	0.153633	0.371913	0.123198	0.327186	-0.473787	0.203637	0.61466	-0.0363934	0.073559	0.309346	0.409066	0.033748	0.017974	-0.3579	0.374674	0.091727	0.087761	-0.137879	0.075238	0.307586	-0.41673	0.068096	-0.24724	0.15542	0.001563	0.083493	-0.084502	-0.423241	-0.19314		11	6
RP11-506F8	3	196614681	196768576	-0.005974	-0.702917	-0.200949	0.141664	-0.337396	0.428327	0.204194	0.226613	-0.475571	0.0023152	0.504335	-0.045081	0.113609	0.251719	0.32668	0.017993	0.007825	-0.108644	0.684527	0.035965	-0.002098	-0.065136	-0.019274	0.296062	-0.386555	0.084828	-0.020302	0.223644	0.088267	0.098831	-0.117754	-0.326669	-0.142887		11	7
RP5-1087L12	3	197034906	197153620	-0.254916	-0.692511	-0.237974	-0.044199	-0.315882	0.362502	0.036745	0.165768	-0.369842	0.68849	0.535311	-0.271683	0.264783	0.078726	0.486827	0.035451	-0.149637	-0.209022	0.561157	0.027011	0.08966	-0.241061	-0.264058	0.206119	-0.410344	0.0115	-0.194921	0.161859	0.07731	-0.047357	-0.08994	-0.311854	-0.084531		11	7
RP11-252K11	3	197395792	197396111	0.0910698	-0.650485	-0.201556	0.055974	-0.276444	0.228147	0.050801	0.131663	-0.34246	0.515374	0.866779	-0.151591	0.165562	0.061818	0.761428	-0.017585	-0.082301	0.065058	0.556641	0.101638	0.201125	-0.132745	-0.132921	0.25845	-0.311482	-0.014819	-0.030712	0.145859	0.088733	-0.037129	-0.053681	-0.187549	-0.042767		11	6
RP11-114F20	3	198343363	198532071	0.091843	-0.397824	0.087711	0.223054	0.0915645	0.253898	0.157285	0.523783	-0.441658	0.302577	1.38224	-0.0343783	0.106461	0.292107	0.305554	0.135519	0.024062	-0.246061	0.722861	0.093669	0.065613	0.06536	0.164694	0.282976	-0.27375	0.0871374	-0.088188	0.252985	0.024446	0.164888	-0.0695424	-0.201054	-0.088157		11	6
CTC-196F4	3	198381035	198552522	0.09944	-0.520692	-0.114969	0.286279	-0.311372	0.166706	0.428555	0.525582	-0.499208	0.523858	1.46258	0.125291	0.112496	0.421225	0.529455	-0.029718	0.212823	0.060813	0.68456	-0.078283	0.1277	0.060347	0.023237	0.39105	-0.355706	0.195972	-0.132256	0.178186	0.067129	0.276894	-0.040981	-0.396302	-0.1408		11	6
RP11-23M2	3	199163579	199163913	-0.001378	-0.021308	-0.11525	0.228851	-0.288235	0.0455124	0.26043	0.395228	-0.366374	0.287193	1.2165	0.063059	0.130108	0.264314	0.03539	0.051733	0.096767	0.13444	0.529786	-0.133534	0.118054	-0.193558	0.064575	0.289502	-0.334424	0.15681	-0.123531	0.062052	0.071924	0.120837	-0.077024	-0.329634	-0.27478		9	5
CTC-36P21	4	55628	207197	-0.03609	-0.193261	0.153539	0.191449	0.184919	-0.161374	0.130203	0.178615	-0.180532	-0.168099	0.098663	0.001203	0.042497	0.294203	-0.0202984	-0.07156	-0.042301	-0.010358	0.303035	-0.206749	0.046248	0.092696	0.312507	-0.346529	-0.956791	0.03139	0.345372	-0.495982	0.002174	0.116334	-0.020564	0.269023	0.042629		3	4
RP11-296G16	4	1065447	1273239	-0.17707	0.00658	-0.024162	-0.018624	0.150414	-0.108064	-0.101361	-0.041545	-0.340202	-0.283269	-0.010201	-0.114094	0.222365	0.193103	0.383743	-0.008506	-0.137707	-0.363066	0.321138	-0.155241	0.011495	-0.030764	0.165335	-0.559698	0.302422	-0.10277	0.423343	-0.154472	0.064652	0.016627	-0.128674	0.168805	-0.048518		6	3
RP11-572O17	4	1592784	1782006	-0.333657	0.143285	-0.02602	0.031858	0.087277	0.10771	-0.085859	-0.132304	-0.301682	-0.062183	0.050542	-0.00506871	0.433142	0.027307	0.647493	-0.019609	-0.275077	-0.044071	0.277446	-0.067878	0.098579	-0.130543	0.015352	1.20323	0.364198	-0.150117	0.308166	-0.098722	0.161103	0.070209	-0.16276	0.366103	0.261788		7	2
RP3-323A24	4	2785966	2935734	-0.266623	0.140923	-0.130837	-0.004733	0.161791	-0.156178	-0.008192	-0.045665	-0.298519	-0.091064	0.113476	0.022575	0.148272	0.245363	0.287419	-0.057522	-0.010021	0.032965	0.091845	-0.147565	0.026067	0.158219	0.006558	0.594629	-0.135044	-0.060685	0.179064	0.005852	-0.059795	0.345944	-0.133942	-0.027838	-0.034079		7	2
RP11-492I23	4	3434298	3624888	-0.17897	-0.023031	0.073283	-0.059486	0.133181	0.135528	-0.065431	-0.152663	-0.260188	-0.023311	-0.127532	-0.076327	0.293277	0.23602	0.258753	-0.05322	-0.243625	0.004919	0.177815	-0.10768	0.058183	-0.125779	0.018512	1.06778	-0.12691	-0.13025	0.213547	-0.041338	0.001724	0.177708	-0.037273	0.101924	0.04317		7	2
RP11-324I10	4	4242545	4434140	-0.181591	0.110275	0.001934	0.108903	-0.022099	0.0184548	0.004725	-0.221388	-0.394187	-0.012722	0.010749	0.037774	0.220335	0.319414	0.06555	-0.098635	-0.098778	-0.159787	0.489153	-0.158943	0.004253	-0.162376	0.094392	0.985489	-0.015001	-0.154206	0.152592	0.161816	0.036461	0.220026	-0.06453	0.198455	0.0831585		7	2
RP11-211H6	4	4986488	5145322	-0.246888	0.036283	-0.003134	-0.008085	0.103161	-0.144829	-0.041355	-0.233306	-0.597596	-0.362059	-0.081653	-0.077724	0.200341	0.255896	0.298574	-0.057795	-0.253681	0.031103	0.183146	-0.154475	0.054246	-0.276644	0.15705	1.42091	0.012789	-0.125882	0.324842	-0.038088	0.000126	0.371743	-0.158588	0.152292	0.493807		8	3
RP11-326O23	4	5161233	5358091	-0.109624	0.179196	0.133067	0.201416	0.189448	-0.134983	0.01846	-0.122123	-0.541719	-0.38328	-0.006023	0.171887	0.143143	0.476262	0.376292	-0.019856	-0.122063	0.074747	0.332101	-0.141981	-0.051077	-0.103432	0.163227	0.871558	-0.06653	-0.064621	0.231703	-0.105036	0.02761	0.408659	-0.084072	0.099991	0.336402		9	3
RP11-117J13	4	8218698	8382645	-0.404187	0.105253	0.040893	-0.037787	0.115146	0.011251	-0.164755	-0.127438	-0.279878	0.0659	0.224989	0.00622167	0.293515	0.207136	0.150223	0.024743	-0.22252	-0.158431	0.447292	-0.075642	-0.000274	-0.331836	-0.0512	1.06066	0.129413	-0.0907952	0.187725	-0.076574	0.064877	0.447826	-0.0248726	0.342588	0.157165		9	3
RP11-61G19	4	10275049	10441085	-0.197862	0.34929	0.079754	0.065017	-0.278105	-0.03629	-0.046254	-0.02618	-0.353103	-0.212173	-0.074956	-0.017447	0.220315	0.253413	0.212604	-0.067958	-0.119229	-0.156556	0.230203	-0.0968162	-0.0587	-0.123419	-0.006072	1.40265	-0.026369	-0.159279	0.057285	-0.090516	-0.002149	0.042419	-0.163119	0.261311	0.136444		8	3
RP11-270I3	4	10707688	10872543	-0.155929	0.248129	0.139711	0.093926	-0.184137	-0.249684	0.030624	0.023381	-0.37497	-0.454255	0.005156	0.024828	0.080172	0.270381	0.620067	-0.048652	-0.048956	-0.237045	0.35179	-0.227201	-0.009346	-0.202614	0.033217	1.48342	0.040737	-0.050117	0.130528	-0.142128	-0.022067	0.016527	-0.177149	0.094762	0.30267		7	3
RP11-22A3	4	12477496	12653921	-0.024803	0.456858	0.160413	0.22346	-0.057834	-0.315731	0.127751	0.181533	-0.613863	-0.312247	-0.080259	0.059868	-0.276816	0.465507	0.354374	0.084287	-0.028712	0.040809	0.296223	-0.246678	0.015949	0.092756	0.040176	0.0988698	0.052567	-0.026554	-0.004154	-0.1174	-0.098403	0.174102	-0.143573	0.181631	0.293946		8	3
RP11-341G5	4	13581880	13678025	-0.083788	0.25162	0.013224	0.085846	-0.108118	-0.183744	0.066659	0.055436	-0.50868	-0.346622	-0.045612	0.003757	-0.071408	0.241295	0.557061	-0.004561	-0.121596	-0.148818	0.285166	-0.250878	-0.008933	0.019465	-0.078646	0.873991	0.0161	-0.079875	0.243937	-0.080543	0.060966	-0.529445	-0.223148	0.202313	0.345337		8	4
RP11-446J8	4	16086405	16252377	-0.156352	0.288627	0.066284	0.134416	-0.157309	-0.272173	0.09671	-0.037014	-0.229384	-0.432362	-0.004445	-0.011947	-0.1604	0.357093	0.65812	-0.026801	-0.075748	-0.027393	0.261588	-0.251154	0.036792	0.021012	0.096194	0.4826	-0.193854	-0.078767	0.17181	-0.072349	-0.060875	-0.416776	-0.120446	0.479319	0.278099		8	4
RP11-441O12	4	18095185	18280937	-0.049274	0.35992	0.189328	0.210556	-0.030334	-0.290935	0.124436	0.144042	0.123026	-0.30002	-0.014414	0.081425	-0.233582	0.442917	0.590861	-0.103707	-0.021487	0.093885	0.313044	-0.257604	-0.074435	0.058319	0.080575	0.539746	0.058135	-0.020589	-0.175788	-0.088538	-0.039551	-0.403212	-0.174165	0.320414	0.464363		8	4
RP11-3J1	4	18804547	18925382	0.064835	-0.074503	-0.030204	0.175518	-0.020241	-0.083155	0.173724	0.096233	-0.110143	-0.332741	-0.028711	0.223286	-0.224638	0.345174	0.104945	0.045403	0.088417	-0.017631	0.16816	-0.098486	0.000256	0.076249	-0.022543	0.209987	-0.152288	0.004312	0.080473	-0.004325	-0.049174	-0.105869	-0.010563	0.236542	0.037917		8	4
RP11-339D20	4	19709793	19832761	0.060238	0.578465	0.255928	0.384422	-0.008933	-0.25556	0.227804	0.1984	-0.531786	-0.275326	-0.034332	0.080857	-0.083789	0.575103	0.456724	0.079647	0.090149	0.164575	0.356637	-0.216132	0.028058	0.255527	0.193436	0.479989	-0.175372	0.088553	-0.274084	-0.002787	-0.053614	-0.184072	-0.016035	0.152881	0.482298		9	5
RP11-362J17	4	20415070	20599112	0.002836	0.347282	0.083273	0.120015	-0.111934	-0.267098	0.129145	0.050205	-0.624332	-0.439435	-0.005015	0.090711	-0.280179	0.413216	0.3896	-0.039254	-0.097864	0.005256	0.249531	-0.199761	0.038121	0.044687	0.120725	-0.090395	0.074067	-0.08628	-0.0421432	-0.050749	-0.066514	-0.362846	-0.176842	0.432229	0.324468		9	5
RP11-10G12	4	22230952	22358099	0.073246	0.236812	0.031063	0.129557	-0.238427	-0.142352	0.03651	-0.08369	-0.471888	-0.430894	-0.097357	0.030859	-0.196299	0.3594	0.333335	0.032479	-0.012954	-0.122675	0.273217	-0.140484	-0.042777	0.291684	0.04841	0.046907	-0.035637	-0.023976	-0.135027	-0.108949	-0.034782	-0.309643	-0.00328	0.29717	0.386683		9	5
RP11-192P23	4	24146303	24317430	-0.01559	0.282506	0.662948	0.139662	-0.326439	-0.135275	0.055786	-0.026817	-0.58075	-0.28304	-0.044866	-0.012701	-0.148969	0.445059	0.338889	-0.000858	-0.107704	-0.0600999	0.323416	-0.243184	-0.051414	0.30246	0.170514	-0.025762	-0.000588	0.00456	-0.08728	0.015393	0.000349	-0.434586	-0.119931	0.787185	0.649819		9	5
RP11-292B1	4	28413776	28515706	0.0023117	0.416041	0.837774	0.394618	-0.00264	-0.246692	0.292963	0.227761	-0.425077	-0.305912	-0.04308	0.166659	-0.120085	0.477442	0.742283	0.078224	0.088576	0.107937	0.356027	-0.272242	0.009411	0.211832	0.164271	0.319282	-0.143321	0.079133	-0.122493	-0.120537	-0.0256247	-0.184961	-0.033424	0.017782	0.661251		10	5
RP11-519A11	4	28815505	28976813	-0.048887	0.559001	0.658727	0.289935	-0.229579	-0.0228831	0.2599	0.113636	-0.377538	-0.227528	-0.085222	0.178352	0.098766	0.400317	0.552869	0.069603	0.056476	0.041567	0.331459	-0.219871	-0.071132	0.191513	0.196949	0.037593	-0.03433	0.004843	-0.1397	0.0211719	0.003759	-0.179493	-0.054134	0.232061	0.446071		10	5
RP11-390C19	4	29448207	29625673	0.072888	0.543255	0.66618	0.290926	-0.097789	-0.241312	0.337293	0.160636	-0.512459	-0.461318	-0.019668	0.202174	0.024127	0.489615	0.25132	-0.000123	0.121885	-0.053844	0.323641	-0.269886	-0.020497	0.230778	0.234684	0.083994	-0.082081	0.070314	-0.0858345	0.011257	-0.017548	-0.288945	-0.209175	0.156591	0.554099		10	5
RP11-20M7	4	32284288	32438544	-0.066143	0.538449	0.65296	0.280723	-0.06357	-0.154877	0.410196	0.223752	-0.448138	-0.087668	-0.056549	0.229054	0.114232	0.526214	0.650849	-0.035424	0.127595	0.17172	0.367786	-0.230598	0.019829	0.39378	0.197364	0.211029	-0.090021	0.128595	-0.037568	-0.049482	-0.064313	-0.173306	0.01733	0.294085	0.486526		10	5
RP11-79E3	4	33696678	33859048	0.009179	0.288232	0.425402	0.156957	-0.167348	-0.206988	0.145382	0.229788	-0.237948	-0.138508	-0.089597	0.137128	0.088559	0.267254	0.501081	0.02277	0.120769	0.060855	0.248781	-0.208614	-0.022535	0.132168	0.038249	0.178059	0.020854	0.036203	0.082407	-0.039177	-0.051434	-0.065491	0.020055	0.150505	0.599771		10	5
RP11-24H13	4	34608504	34779109	-0.269708	0.598024	0.801569	0.420836	-0.129051	0.233876	0.379724	0.369523	-0.216043	-0.119777	0.050391	0.11609	-0.044615	0.331672	0.461332	0.149357	0.108472	-0.049011	0.268631	-0.423266	-0.001265	0.382717	0.250094	0.373952	0.030772	0.184403	-0.304276	-0.06688	-0.067085	-0.22436	-0.080984	-0.031804	1.12651		9	5
RP11-135M12	4	35352978	35546488	-0.034212	0.493142	0.846371	0.347427	-0.0903371	0.163416	0.391542	0.443304	-0.306706	-0.192251	-0.003936	0.103367	0.026627	0.641329	0.539569	0.081644	0.202425	-0.126687	0.397064	-0.097408	-0.083532	0.515272	0.319763	0.514908	0.048355	0.0799403	-0.123027	-0.144097	0.107295	-0.13766	-0.0132524	-0.061884	0.521615		9	5
RP11-103J17	4	36821023	36984323	-0.066701	0.318723	0.094576	0.172876	0.039865	0.172635	0.103505	-0.017532	-0.310608	-0.033999	-0.066038	-0.008312	0.112681	0.104926	0.292958	-0.039386	-0.029236	-0.004467	0.254038	-0.162847	0.016012	-0.054804	-0.011573	0.043857	-0.069268	0.007337	-0.260677	-0.019699	0.022035	0.103923	-0.096078	0.279197	0.007553		9	5
RP11-36B15	4	37338257	37499326	0.057671	0.571875	0.676703	0.233445	-0.240517	0.132036	0.180801	0.172638	-0.664332	-0.362916	0.006744	0.148937	0.017684	0.446277	0.600251	0.002779	-0.026355	0.051093	0.259966	-0.210271	0.035744	-0.109577	0.22807	0.35596	-0.146666	-0.042748	-0.074075	0.082318	-0.05335	-0.418824	-0.034379	-0.15614	0.122434		9	5
RP11-392K14	4	37851044	37938368	-0.017254	0.310513	0.699498	0.277532	-0.087674	0.230339	0.053155	0.094804	-0.575654	-0.237336	0.009693	0.186135	0.269541	0.544759	0.666251	0.048872	-0.10503	-0.210424	0.413937	-0.160802	0.066457	-0.097824	0.150855	0.346724	-0.225135	-0.050382	-0.117303	0.06843	0.000366	-0.406409	0.004908	-0.379893	0.128336		9	5
RP11-213G21	4	38321822	38503708	-0.101087	0.381062	0.411876	0.089739	0.006506	0.070657	0.070298	0.107249	-0.420285	-0.218514	0.039384	0.10172	0.085408	0.364375	0.442985	0.023228	-0.10859	0.02125	0.358326	-0.09779	0.049965	-0.087568	0.170777	0.101445	-0.254162	-0.049237	0.014574	0.07071	0.000879	-0.378063	-0.052759	0.115495	0.138708		9	5
RP11-343C9	4	39576854	39775792	0.138742	0.664012	0.738176	0.232824	0.015409	0.084383	0.272554	0.41274	-0.34871	-0.140564	0.066494	0.285832	0.12713	0.521971	0.632502	0.071231	0.109479	0.134258	0.334782	-0.171224	0.025521	0.034357	0.293841	0.462035	-0.003222	0.134432	-0.0774774	0.234792	0.001606	-0.090612	-0.008335	0.097939	0.378844		9	5
RP11-542I3	4	43984025	44187744	0.034698	-0.321897	-0.023303	0.079993	-0.291397	-0.003273	-0.057834	-0.293435	-0.299404	-0.256303	-0.377695	-0.098707	-0.318362	0.147306	-0.104421	0.034712	-0.048488	-0.167005	-0.172312	-0.104396	-0.10607	-0.122448	-0.073544	-0.244777	-0.265442	0.016442	0.051408	-0.092732	-0.084992	-0.352903	-0.20004	-0.187106	-0.0241351		9	5
RP11-55C6	4	44675182	44821854	0.037682	0.29514	0.684963	0.136194	-0.229624	0.196315	0.109773	0.154266	-0.480325	-0.254407	-0.082836	0.0970113	-0.052433	0.395734	0.579617	-0.049315	-0.030379	-0.066787	0.192327	-0.266315	-0.053303	-0.029954	0.110063	0.251109	-0.375974	-0.021198	-0.235922	-0.136357	0.045463	-0.311356	-0.354942	1.47646	0.506854		10	5
RP11-416A5	4	45754356	45926827	0.053118	0.058368	0.508521	0.105632	-0.11461	0.075683	-0.010377	0.137025	-0.446518	-0.442855	0.002406	0.0817181	-0.08438	0.440119	0.453492	0.001796	-0.045892	-0.117856	0.26948	-0.205294	-0.105984	0.068007	0.080474	0.201339	-0.467074	0.027029	-0.0735984	-0.043308	0.044549	-0.289164	-0.142178	0.730591	0.385918		10	5
RP11-100N21	4	47410180	47578356	-0.17315	0.212434	-0.055811	-0.071067	0.022294	0.029105	0.124886	0.331932	-0.485618	-0.158674	-0.343849	0.0572	-0.207236	0.260611	-0.052526	-0.034411	-0.035638	0.001165	0.267131	-0.108157	0.012397	-0.17526	0.125901	0.218245	-0.227482	-0.025293	-0.108347	-0.0995	-0.097399	0.080671	-0.145194	0.246381	0.103946		10	4
RP11-19F13	4	48670535	48829699	0.137331	0.536026	0.35843	0.147792	-0.048756	0.118427	0.175321	0.423057	-0.289653	-0.088013	0.027144	0.273752	0.203261	0.447609	0.737061	-0.014487	0.096397	0.249402	0.331125	-0.132432	0.008031	0.131193	0.114243	0.354079	-0.031484	0.016495	-0.023594	0.037629	-0.014594	0.131393	0.028205	0.113382	0.608147		10	3
RP11-157C8	4	53206265	53354157	0.203409	0.222363	0.324668	-0.319011	0.166231	-0.235489	-0.101277	-0.058004	0.158573	-0.34189	0.198012	-0.170207	-0.176012	0.193588	-0.445119	-0.103486	-0.087956	-0.283651	0.857396	0.395281	0.094041	-0.078644	-0.118123	0.159164	1.43414	-0.113874	-0.106234	-0.103743	0.009487	0.042905	0.787181	0.045978	0.496232		13	4
RP11-18M17	4	54192064	54350927	-0.162485	0.331119	0.420821	-0.134068	0.185134	-0.316213	0.062644	-0.004745	0.001886	-0.371366	0.283399	-0.191423	-0.037195	0.346403	-0.473108	-0.037671	0.002231	0.143226	0.882496	0.391512	0.214798	0.005195	0.002332	0.201373	1.35044	-0.074075	0.104568	-0.074836	-0.010069	0.046493	1.1376	-0.018852	0.344236		13	4
RP11-12J3	4	54669405	54830719	0.065329	0.525733	0.421017	-0.129843	0.242031	-0.125198	0.166326	0.159235	-0.055044	-0.0213732	0.392247	-0.106411	0.010393	0.432568	-0.435124	-0.054348	0.052494	0.145646	0.871519	0.378419	0.23557	0.1779	0.104301	0.506291	1.21904	0.068181	0.00524	0.134333	0.014996	0.246786	1.09254	0.248573	0.609884		14	4
RP11-231C18	4	54968263	55100426	-0.145539	0.375617	0.303625	-0.261315	0.121072	-0.0125096	0.068078	-0.056103	-0.245829	0.00520012	0.334579	-0.153682	-0.195286	-0.077359	-0.503916	-0.08716	-0.088576	0.075763	0.926285	0.155114	0.138453	0.058389	-0.149472	0.118718	1.18596	-0.145139	0.072477	0.028763	-0.001851	0.06638	0.974655	0.145565	0.583053		14	4
RP11-738E22	4	57593238	57796711	0.03489	0.164389	0.461819	-0.049485	0.255582	-0.159859	0.271915	0.214745	0.039414	-0.124638	0.327238	-0.006322	0.15493	0.157701	-0.192187	0.062661	0.186782	0.241541	0.195425	0.119807	0.171004	0.157786	0.045834	0.430939	0.023475	0.097205	-0.160586	0.067441	0.062361	0.241367	0.75933	-0.056375	0.33066		15	4	0.198276	4q
RP11-355L4	4	57612955	57791514	-0.003328	0.185202	0.274787	-0.003614	0.162388	-0.154589	0.223715	0.179939	-0.0351949	-0.213482	0.455864	0.075672	0.068893	0.15047	-0.239482	-0.057566	0.047638	0.163767	0.231776	0.313195	0.184035	0.097858	0.108017	0.465618	-0.023738	0.072736	-0.063557	0.087305	0.031008	0.224801	0.149922	-0.0187599	0.323244		15	4
RP11-4O3	4	58332156	58495951	0.057181	-0.009862	0.337174	-0.096053	0.184326	-0.08106	0.135393	0.085332	-0.127523	-0.357438	0.269914	0.165551	-0.210981	0.120513	-0.500098	-0.054598	0.011208	0.105557	0.1512	0.311593	0.126359	0.107613	0.091372	0.313506	0.052838	-0.004275	-0.174617	0.077967	0.007739	0.131876	0.542951	0.092862	0.256954		14	4
RP11-340A13	4	59679466	59852564	-0.138528	-0.010703	0.182205	-0.246399	-0.061392	-0.194141	0.04777	-0.119268	-0.035775	-0.210545	0.189047	0.288787	-0.303265	-0.06073	-0.413542	-0.112464	0.067267	-0.070034	-0.137305	0.262468	-0.011185	0.188903	-0.087761	0.245104	0.09681	0.001999	-0.0674882	-0.127061	0.114514	0.054301	0.44677	0.071855	0.247623		14	4
RP11-525J21	4	60365740	60504963	0.005815	0.135356	0.35091	-0.072981	0.106569	-0.183249	0.222309	0.093964	0.018092	-0.172515	0.283208	0.238799	-0.137328	0.135369	-0.378489	-0.104812	0.085495	0.065667	-0.047972	0.387311	0.070264	0.22915	0.101829	0.394735	0.309542	0.047755	-0.143158	0.013443	0.185281	0.344311	0.560636	0.231244	0.457178		15	4
RP11-507B10	4	60959924	61146015	0.062667	-0.011438	0.396465	-0.163702	-0.03268	-0.027491	0.200782	0.035035	0.016644	-0.138664	0.180794	0.0858668	-0.11201	0.162171	-0.54642	0.006023	0.1655	-0.029323	-0.014289	0.153775	0.041941	0.222654	0.117377	0.237874	0.190976	0.093267	-0.161531	0.042425	0.050692	0.202247	-0.199674	-0.006804	0.214246		13	4
RP11-16N2	4	61797049	61944671	-0.000694	0.01098	0.277049	0.040264	0.060225	-0.09424	0.192313	0.173125	0.121019	-0.106764	0.214368	0.226992	-0.096313	0.020267	-0.030391	-0.009438	0.172987	0.017752	0.014888	0.112703	-0.005493	0.232596	0.018452	0.275842	0.121533	0.059919	-0.183686	-0.026398	-0.033749	0.100326	-0.148734	0.157853	0.43041		13	4
RP11-24I7	4	62478161	62653308	-0.08857	0.193679	0.392144	-0.088888	-0.007707	-0.166797	0.220701	0.32682	-0.012233	-0.166895	0.182068	0.154293	-0.219194	0.074709	-0.084759	-0.049947	0.148717	0.101625	0.002811	0.183371	0.053099	0.1484	0.154805	0.384929	0.406692	0.097865	-0.16297	0.029722	0.024639	0.13167	-0.141616	0.262934	0.385849		13	4
RP11-553E5	4	63917050	64119556	0.067608	0.206798	0.458957	0.073138	0.060662	0.107473	0.155275	0.345079	0.010932	-0.195302	0.283312	0.166665	-0.084593	0.383084	-0.217377	0.060752	0.252108	0.001983	-0.038758	0.0878669	-0.084853	0.304147	0.248847	0.34302	0.01554	0.081601	-0.271601	-0.072215	0.067856	0.37921	-0.074185	0.192362	0.418389		12	4
RP11-204H9	4	65014067	65179070	-0.193176	-0.069465	0.330847	-0.038451	-0.00973	-0.143604	0.110654	0.653942	0.017382	-0.257401	0.152523	0.050794	-0.176063	0.114366	-0.286631	-0.026286	0.089128	-0.085354	-0.073869	0.05164	-0.026241	0.133139	0.038432	0.297063	-0.0806	0.04991	-0.311618	-0.090793	-0.128273	0.125344	-0.171993	0.221723	0.335626		12	4
RP11-211G17	4	67198861	67250738	0.134685	0.182569	0.293225	0.177973	-0.037592	-0.022206	0.327195	0.417781	-0.108874	-0.169788	0.037323	0.425177	-0.096165	0.251642	-0.083122	0.047002	0.293976	0.194807	0.078222	0.111425	-0.030284	0.425487	-0.00367	0.268703	-0.156854	0.135422	-0.099881	-0.02406	-0.080256	0.226253	0.027642	0.29957	0.243402		12	4
RP11-540I12	4	67409454	67578149	-0.034405	0.064693	0.395927	-0.048149	0.13204	-0.259053	0.158654	0.458064	0.08707	-0.259014	0.257224	0.255693	-0.14295	0.128095	-0.243519	0.014213	0.187008	0.089252	0.212793	0.194643	0.078633	0.13235	0.031167	0.344853	-0.040078	0.064201	-0.270313	-0.088046	-0.059649	0.22569	-0.055845	-0.265639	0.511182		12	5
RP11-35D5	4	68605784	68793498	0.046901	-0.05284	0.40015	-0.097889	0.064632	-0.229407	0.130408	0.505709	-0.190376	-0.58782	-0.015388	0.475484	-0.233853	0.173492	-0.543292	-0.031691	0.036771	0.087112	0.09948	0.320773	0.053865	0.131957	0.018611	0.300714	-0.197153	-0.001723	-0.327435	-0.010918	-0.046999	0.067873	-0.049474	-0.446169	0.313829		12	6
RP11-183M3	4	68790646	68791434	-0.040938	0.249945	0.498378	0.023283	0.227585	-0.067799	0.237339	0.570426	0.010919	-0.250581	0.054704	0.228902	-0.049334	0.171914	-0.263763	-0.021707	0.160647	0.178552	0.170241	0.088475	-0.045772	0.222032	-0.080687	0.376782	-0.217702	0.050483	-0.276615	-0.11942	-0.037475	0.270995	-0.030089	-0.322642	0.392798		11	6
RP11-468N14	4	69840945	70058935	0.205542	0.279623	0.143277	-0.131618	0.037572	-0.044418	0.000772	0.21408	-0.006433	-0.367581	0.275129	-0.058929	-0.15231	0.049473	-0.471122	-0.143214	-0.011107	-0.191442	0.389702	0.091455	0.031763	0.088486	-0.0496	0.242611	-0.340859	-0.08389	-0.304271	-0.131366	-0.098116	-0.120502	-0.162144	0.126117	-0.007999		11	6
RP11-92H22	4	72025509	72179921	0.127895	-0.059149	0.135777	-0.045187	-0.096278	0.106649	0.117223	0.099661	-0.070296	-0.167634	-0.080514	0.175854	-0.030225	0.235184	-0.027708	-0.047103	0.076277	0.191054	0.201023	0.003805	-0.0123429	0.155838	0.056387	0.125355	-0.227637	0.052558	0.150876	0.059485	-0.086763	-0.018151	-0.020415	0.350099	0.466298		10	5
RP11-1J11	4	72411706	72551811	0.173399	0.006019	0.116587	-0.010399	-0.208284	0.04166	-0.026558	0.152553	-0.116398	-0.084298	0.042489	0.105918	-0.158686	0.364508	0.0647988	0.098062	0.05371	0.021791	0.693613	-0.124572	-0.062165	0.0449425	-0.063859	-0.0707751	-0.346729	0.078998	-0.071959	-0.022343	-0.091582	-0.113173	0.018797	-0.789305	-0.180967		10	5
RP11-373J21	4	73467545	73644537	-0.032335	0.056754	0.401333	-0.132703	-0.047225	-0.196652	0.094643	0.396194	0.206709	-0.279325	-0.038703	-0.027479	-0.15422	0.021654	-0.288885	-0.000702	0.130929	0.02283	0.178174	-0.070499	0.030191	0.105328	-0.04518	0.21432	-0.354219	-0.000462	-0.211597	-0.187461	-0.088185	0.172276	-0.144524	-0.377301	0.460503		10	5
RP11-447E20	4	74934580	75012988	0.03846	0.048293	0.413998	-0.106795	0.001519	-0.136749	0.128788	0.551448	0.017501	-0.269711	-0.109258	0.04236	0.226723	0.093361	-0.012219	0.04855	0.16156	0.178456	0.412769	0.034209	0.211626	0.262775	0.015316	0.275909	-0.397853	0.037426	-0.409655	0.056348	-0.104027	0.188977	-0.083557	0.204523	0.314744		10	4
RP11-2G10	4	75282894	75452153	0.011639	-0.035539	0.516057	0.009826	0.018787	-0.162076	0.223411	0.522021	0.04041	-0.407276	-0.137144	-0.066371	0.013703	0.140575	0.004092	0.019077	0.222236	0.01479	0.245384	-0.00783	0.101887	0.219229	0.08854	0.397937	-0.422411	0.119988	-0.396323	-0.055303	-0.109797	0.329231	-0.078807	0.102391	0.291284		10	4
RP11-556F3	4	77818636	77819466	-0.037509	0.139822	0.490697	-0.041453	0.006351	-0.119209	0.147375	0.48903	0.005159	-0.352943	0.096499	0.027402	-0.073997	0.051141	0.156703	0.010523	0.121371	0.205883	-0.012063	0.042316	0.135945	0.162525	0.072148	0.407894	-0.425653	0.037172	-0.30832	0.035629	-0.053696	0.160141	0.003591	1.26479	0.415414		11	4
RP11-224D4	4	77920726	77977750	-0.056313	-0.0608408	0.373534	-0.0454982	0.066435	-0.0851387	0.187032	0.305922	-0.074256	-0.261635	-0.101724	-0.130814	-0.100855	0.131159	-0.081353	0.016255	0.099523	0.057407	-0.015643	-0.028287	-0.009485	0.0652	-0.013663	0.29709	-0.311848	0.033703	-0.117399	0.008615	-0.024829	0.096999	-0.107676	1.06174	0.278493		11	4
RP11-1E1	4	78334428	78481013	0.058653	-0.158319	0.282805	0.03044	0.005015	-0.077042	0.029627	0.231585	-0.053269	-0.227108	-0.082544	0.096014	0.038586	0.181778	-0.000852	0.039838	0.09632	-0.01176	0.123712	-0.0343827	-0.011799	0.118781	0.028604	0.25813	-0.300284	0.045792	0.0318537	0.044322	-0.06712	-0.039685	0.043632	0.713078	0.172921		11	4
RP11-438E5	4	80522031	80685287	0.274419	-0.267444	0.090625	-0.092327	-0.044182	-0.198294	-0.018279	0.159418	-0.116983	-0.298676	-0.346916	0.0955366	-0.379634	0.30571	0.069897	-0.072394	0.035582	-0.065421	0.484223	-0.029604	-0.113951	0.089328	0.052205	0.26646	-0.551077	-0.014322	0.0464875	-0.114096	-0.088475	-0.017519	-0.102986	0.572196	0.024394		11	4
RP11-377G16	4	81454382	81648539	-0.022447	-0.055906	0.455753	-0.1279	0.031845	-0.11469	0.142994	0.490345	0.091376	-0.244068	-0.055713	0.004542	-0.002346	0.071809	0.447604	-0.028569	0.117125	-0.192658	0.049415	-0.07254	0.020755	0.131297	-0.023378	0.568343	-0.441012	0.038924	-0.152797	-0.125155	0.236406	0.165363	-0.102212	1.28715	0.490463		12	4
RP11-258N2	4	81646214	81811336	0.264681	0.060539	0.046406	0.110192	0.031993	0.037476	0.201677	0.375218	-0.204838	-0.39433	-0.132786	0.122243	-0.140837	0.320488	0.119526	0.016378	0.040028	0.1235	0.011546	0.000961	0.145522	0.551452	0.174295	0.361789	-0.100571	0.060151	0.013903	-0.008261	0.028409	-0.091135	0.118437	0.673821	0.055748		12	4
RP11-100N20	4	82337157	82471136	0.082133	0.201813	-0.027744	0.079831	-0.131466	-0.008685	0.090252	0.310558	0.009258	-0.117386	0.053033	0.019949	0.102632	0.289185	0.874354	-0.004143	0.079597	0.183801	0.199954	-0.08605	0.037698	0.17937	0.098329	0.346795	-0.445986	-0.073534	-0.289537	-0.06022	0.009513	-0.02819	0.071593	0.14658	0.173572		12	4
RP11-263F19	4	83400812	83487119	0.078774	0.145057	0.521658	-0.142905	-0.00667238	-0.018457	0.091365	0.284715	-0.084744	-0.464523	0.020526	-0.0116156	-0.073847	0.174465	0.341952	0.05674	0.062671	0.244523	0.435626	-0.039721	-0.009832	0.214755	0.124047	0.651729	-0.387938	0.022191	-0.105555	0.04733	-0.123404	0.193996	0.11806	1.08453	0.418549		12	4
RP11-397K17	4	84764936	84940104	-0.046915	0.00888	0.323308	-0.083738	-0.078283	-0.0229706	0.103173	0.240098	0.0428	-0.251948	-0.078408	-0.130054	0.515979	0.051262	0.382292	0.04566	0.029886	0.19863	0.301945	-0.09679	-0.009924	-0.002019	-0.11061	0.407665	-0.377085	-0.045843	-0.19243	0.024682	-0.041629	0.140844	0.074189	1.05069	0.517305		12	4
RP11-176K15	4	85303831	85451557	-0.111919	-0.100788	0.434364	-0.092431	-0.064972	-0.162235	0.037332	0.304534	0.041261	-0.416816	-0.079227	0.063522	-0.314941	0.036595	0.400563	-0.03116	0.126766	0.122346	0.506271	-0.062692	-0.025697	0.082837	-0.082131	0.439422	-0.419725	0.053332	-0.093603	-0.108476	-0.127066	0.134368	-0.01689	0.386716	0.276672		12	5
RP11-123I8	4	86523478	86697066	0.128665	0.078205	0.529551	-0.023311	-0.00835086	-0.241125	0.176416	0.571952	-0.007489	-0.173202	-0.04633	0.306577	-0.159006	0.142235	0.311026	0.123525	0.089046	0.373807	0.246157	0.082106	0.12383	0.19745	0.137194	0.704735	-0.247848	0.0780555	-0.341466	-0.03884	0.0008965	0.36901	0.0719825	1.50518	0.319418		12	5
RP11-19C20	4	87611708	87781015	-0.096127	-0.173856	0.304422	-0.217863	-0.041089	0.064101	0.107219	0.246449	0.056769	-0.362711	-0.113711	-0.077537	-0.265793	-0.089493	0.327793	-0.015432	-0.002763	0.177909	-0.024623	0.000358	0.013022	-0.004675	0.021725	0.428769	-0.367642	0.004618	0.01217	-0.052845	-0.08081	0.029226	-0.000732	1.44572	0.539806		12	5
RP11-113G13	4	89047633	89235256	-0.020529	-0.127215	0.394621	-0.241584	-0.093552	0.103084	0.014285	0.239831	0.026893	-0.099584	-0.004084	0.0107712	0.055505	0.0863401	0.354801	0.062992	-0.015966	-0.077513	0.269655	-0.023445	0.105854	0.156197	-0.04002	0.474381	-0.344918	0.0385201	-0.139193	0.00718	-0.0161761	0.222869	-0.00918322	1.34986	1.85196		12	5
RP11-17P8	4	89759784	89945788	-0.141428	-0.262437	0.249495	-0.092147	0.250021	-0.007739	-0.010885	0.089045	-0.055895	-0.30472	-0.215937	-0.183735	-0.019787	-0.068141	0.23235	-0.064591	-0.042064	0.025256	0.02473	0.08497	0.082072	0.056704	-0.131858	0.428534	-0.186251	-0.073324	0.021103	-0.059053	0.082237	0.010173	0.077921	1.12016	0.273887		12	5
RP11-502A23	4	90167431	90338703	0.106103	-0.131037	0.361756	-0.0381243	-0.00434525	-0.137645	0.136993	0.395686	0.0047305	-0.296768	0.045588	0.011968	-0.027591	0.096571	0.467659	0.094985	0.200458	0.133344	0.208032	0.082783	0.209635	0.2121	0.030299	0.58197	-0.340747	0.102003	-0.196733	0.014774	0.243087	0.21348	0.098845	1.06655	0.332275		12	5
RP11-115D19	4	90884857	91062802	-0.017561	-0.007737	0.522782	0.034212	-0.0349952	-0.040881	0.208972	0.417479	0.18129	-0.218666	0.039097	-0.158746	-0.136496	0.241031	0.551073	0.062803	0.245135	0.127385	0.188183	-0.107382	0.002278	0.067471	-0.005517	0.57109	-0.281053	0.146074	-0.302126	-0.043658	0.127787	0.218876	0.090207	1.0499	0.485684		12	5
RP11-11N6	4	91891910	92040525	0.149318	0.015202	0.393028	0.056934	-0.023223	-0.229528	0.2311	0.385826	-0.074268	-0.317104	-0.063168	0.162776	-0.164045	0.223236	0.347025	0.090145	0.267157	0.226489	0.171863	-0.084808	0.012524	0.337324	0.131996	0.678524	-0.334105	0.177812	-0.141593	-0.017914	0.032857	0.238072	0.182042	1.09487	0.063251		12	5
RP11-9B6	4	93559592	93669451	-0.044451	-0.077584	0.208977	0.004481	-3.7e-05	-0.135938	0.282275	0.509012	0.100285	-0.217324	-0.145863	-0.092545	-0.236909	0.143482	0.3915	0.001002	0.230126	0.097876	0.173358	-0.067215	-0.011711	0.162173	0.015544	0.64048	-0.422795	0.137661	-0.332087	-0.066822	0.000618	0.209484	-0.111046	-0.022286	0.46909		11	5
RP11-44P19	4	93769028	93913892	0.124002	0.009329	0.241771	0.084763	0.043184	-0.23869	0.338559	0.518784	0.040095	-0.30947	-0.033163	0.082292	-0.174519	0.194096	0.397407	-0.036932	0.390112	0.24208	-0.043759	-0.097299	0.024634	0.319464	0.159338	0.672422	-0.276489	0.187513	-0.331235	-0.051657	-0.051606	0.318025	-0.064056	-0.387529	0.254035		11	6
RP11-16I17	4	94801025	94976533	0.002097	-0.242575	0.087368	-0.02497	-0.025608	-0.106477	0.104926	0.254799	0.077465	-0.20763	-0.105409	0.021872	-0.195165	0.097541	0.288018	-0.042472	0.157349	0.025963	0.149661	-0.1773	-0.055866	0.110526	-0.093346	0.36607	-0.322356	0.054952	-0.168773	-0.035115	-0.090636	0.068928	-0.040648	-0.379258	0.071847		11	6
RP11-10L11	4	96487094	96656065	0.040659	-0.219724	0.043156	-0.122055	-0.005518	-0.272732	0.058227	0.291188	-0.056266	-0.208407	-0.044441	-0.074749	-0.101109	0.018297	0.38291	0.024135	0.096529	0.118571	0.125742	-0.013473	0.029353	0.083736	-0.041202	0.408625	-0.42579	-0.021662	-0.240179	-0.068646	-0.041346	0.060144	-0.206952	-0.418333	0.155156		11	6
RP11-354C17	4	97132198	97291746	0.067057	0.050818	0.169421	-0.028204	-0.038091	-0.084434	0.215127	0.429284	0.039043	-0.105547	0.01129	-0.012275	-0.154578	0.166114	0.299675	-0.047965	0.159356	-0.025062	0.188129	0.004242	-0.021289	0.228249	0.122234	0.62221	-0.323517	0.10972	-0.158194	-0.052604	-0.015953	0.129234	0.073752	-0.407281	0.281549		11	6
RP11-242D9	4	98761045	98971607	0.023023	-0.203571	0.050338	-0.112888	-0.077225	0.05994	0.018061	0.082126	-0.119192	-0.21276	0.072625	-0.043898	-0.20492	0.129678	-0.036861	-0.098534	0.02034	-0.08167	0.164807	-0.058281	-0.069892	0.045903	-0.092646	0.376336	-0.149937	-0.029612	0.036213	-0.028099	-0.011927	-0.033656	-0.185577	0.0713399	0.00311812		11	6
RP11-428B4	4	100084755	100197057	-0.108256	-0.007852	0.132119	-0.097329	0.008814	-0.231614	0.145064	0.109526	-0.11012	-0.044364	-0.070782	-0.084908	-0.305434	-0.014434	0.753677	-0.0886	0.016221	0.178847	0.171069	-0.033089	0.075787	-4.2e-05	0.042015	0.532681	-0.407231	-0.024675	-0.182093	0.083184	-0.089348	-0.041421	-0.072508	-0.294528	0.314754		11	6
RP11-56D20	4	101288991	101463429	0.001303	0.071089	0.222852	-0.140962	-0.052785	-0.063141	0.161335	0.198924	-0.170869	0.026884	0.026727	-0.075035	-0.026548	0.184277	0.871699	0.025918	0.0771	-0.006816	0.347517	0.029932	-0.027038	0.114349	0.066505	0.552378	-0.447437	0.08723	-0.496496	-0.022961	-0.029996	0.102376	-0.112904	-0.40637	0.318778		11	6
RP11-13F20	4	101648732	101810250	-0.06012	-0.172201	0.111636	-0.163515	-0.00395	-0.291965	0.13917	0.327467	0.117399	-0.156559	-0.031656	-0.228576	-0.241126	0.000505	0.966501	-0.050943	0.101334	-0.003795	0.199987	-0.059469	-0.056223	0.172769	-0.101788	0.519042	-0.490753	0.034141	-0.392845	-0.163444	0.015543	0.060406	-0.186408	-0.533802	0.351271		11	6
RP11-167N19	4	101951353	102101519	-0.020685	-0.18677	0.125629	-0.141798	-0.11522	-0.012811	0.146902	0.255595	0.036427	-0.113337	-0.073804	-0.0241286	-0.118415	0.136241	0.846837	0.015627	0.191773	-0.116257	0.260443	-0.09616	-0.068111	0.178044	-0.057128	0.442082	-0.495498	0.07128	-0.216034	-0.074474	0.087732	0.070569	-0.26314	-0.499494	0.296953		11	6
RP11-110C16	4	103205367	103358814	0.142016	-0.494097	0.089007	0.116631	-0.148142	-0.275891	0.061387	-0.183798	-0.430011	0.003151	-0.314476	-0.116929	-0.304616	0.122793	-0.177029	-0.04916	0.042131	0.023768	-0.178717	0.016657	-0.100566	-0.059388	-0.112836	0.205352	-0.228699	0.031145	-0.161009	-0.064284	-0.166004	-0.276688	-0.088121	-0.404457	0.073529		11	6
RP11-174B22	4	104569397	104653277	0.069992	0.139806	0.248589	-0.036652	0.113311	-0.21155	0.222507	0.51533	0.107574	-0.01847	0.020969	-0.011029	-0.191708	0.141164	0.938336	-0.031583	0.175208	0.169069	0.329807	-0.052337	-0.039261	0.191069	0.036715	0.64589	-0.380389	0.093851	-0.318324	-0.072644	0.042319	0.146122	-0.014148	-0.416861	0.418373		11	6
RP11-122B24	4	105426522	105495984	0.15748	0.158339	0.235318	0.059437	0.136636	-0.247576	0.212244	0.392737	-0.016074	-0.052523	-0.015137	0.137735	-0.097385	0.164998	0.323742	0.147338	0.233175	0.248471	0.417864	0.03504	0.038486	0.225118	0.072618	0.773185	-0.237615	0.093754	-0.186318	-0.031309	0.069205	0.137065	0.049567	-0.354842	0.178915		11	6
RP11-16G16	4	106472242	106647458	0.003213	-0.109397	0.15009	-0.08883	-0.037262	-0.212924	0.153299	0.377933	0.110465	-0.169666	0.080689	-0.032778	-0.134614	0.08291	0.1369	-0.001789	0.181922	0.012833	0.307795	0.016334	-0.022013	0.156904	0.02333	0.562609	-0.407601	0.035539	-0.126469	0.013991	-0.019193	0.081254	-0.05727	-0.427141	0.240201		11	6
RP11-88D10	4	107874843	108081943	0.03213	-0.167259	0.199223	-0.010389	-0.128749	-0.192913	0.09484	0.373861	0.01293	-0.064144	-0.093657	-0.099208	-0.21692	0.175624	-0.031822	0.030396	0.157321	-0.075724	0.07653	-0.077846	-0.042179	0.211943	0.055793	0.543059	-0.53586	0.024495	-0.310726	-0.025362	0.012684	-0.051258	0.167211	-0.312044	0.268938		11	6
RP11-109F18	4	108777051	108935258	0.080995	-0.030533	0.150364	-0.134178	-0.083755	-0.0792	0.15962	0.457262	-0.095278	-0.175957	0.135288	0.028871	-0.236773	0.163912	-0.107076	0.029343	0.073688	-0.035167	0.002518	0.127087	0.034082	0.171575	0.157277	0.640958	-0.325467	0.023083	-0.12732	0.040862	0.088316	0.161323	0.146115	-0.303936	0.348265		11	6
RP11-75N20	4	110015183	110177329	-0.050967	0.038545	0.263471	0.009017	-0.034917	-0.237354	0.265788	0.392082	0.047748	0.03952	0.022334	0.016801	-0.136964	0.164381	0.864294	-0.013658	0.225273	0.180346	-0.068347	-0.073208	0.014867	0.203286	0.055208	0.666168	-0.296821	0.057812	-0.268308	-0.008479	0.032733	0.13227	-0.151526	-0.496208	0.348271		11	6
RP11-57A22	4	110195936	110363348	0.01263	-0.155724	0.213477	-0.005143	-0.03489	-0.180927	0.136365	0.422357	0.044761	-0.064592	-0.007654	-0.097287	-0.232804	0.185539	0.648619	0.028432	0.191185	-0.047555	0.048002	0.002647	-0.05577	0.200021	0.111612	0.626818	-0.436734	0.006584	-0.240601	0.015389	0.048106	0.102318	-0.177838	-0.55998	0.206178		11	6
RP11-380D23	4	111798602	112000228	0.179128	0.196268	-0.02513	0.104561	-0.073984	0.0511292	0.333816	0.250397	-0.109662	-0.104423	-0.170575	0.128942	-0.057105	0.254871	0.036667	0.102722	0.100032	0.329237	0.159639	0.099316	-0.006607	0.355783	0.154773	0.382104	-0.250527	0.092345	-0.286399	-0.032578	-0.024008	0.111081	0.053527	0.131324	0.091194		10	6
RP11-326N15	4	112453995	112642941	0.046736	-0.091888	0.114735	0.02193	-0.111837	-0.0302801	0.085453	0.335407	-0.088644	-0.244458	0.367526	-0.104471	-0.239931	0.176959	-0.036615	-0.009331	0.085676	-0.070651	0.063244	0.027935	-0.05824	0.162632	0.013541	0.554377	-0.542583	0.017881	0.133777	0.03422	0.10815	0.010664	-0.002664	-0.442504	0.104435		10	5
RP11-419E3	4	116459187	116610575	0.197129	-0.231083	0.311674	-0.079793	-0.084091	-0.166216	0.022185	0.386561	0.109934	-0.231575	0.005014	0.054761	0.08336	0.097229	-0.055002	0.057138	0.067413	-0.175252	0.219113	-0.025448	-0.038732	0.193626	0.005855	0.306879	-0.470428	-0.040331	-0.135858	-0.096313	-0.036761	0.279265	-0.14661	-0.095638	0.200068		10	5
RP11-25B14	4	116886324	117075237	0.046487	0.194591	0.183764	-0.12085	-0.047272	-0.020043	0.26707	0.560073	-0.173728	-0.351669	0.081786	0.068844	-0.145448	0.168724	0.12645	0.044326	0.103491	0.019025	0.086536	0.050247	0.012408	0.245135	0.092626	0.540349	-0.59403	0.097198	-0.015492	0.057374	-0.018474	0.497788	-0.202085	0.222058	0.246361		10	5
RP11-55L3	4	117717863	117881913	0.028921	0.046598	0.292978	-0.039327	-0.119308	-0.072452	0.268527	0.611142	-0.081638	-0.14031	-0.137213	-0.074371	-0.139815	0.336418	0.060756	0.0801	0.182352	0.009676	-0.023073	-0.0275383	-0.091291	0.298467	0.285944	0.742774	-0.582835	0.127283	-0.224576	0.058879	0.003954	0.588202	-0.108743	-0.462646	0.472988		10	5
RP11-510D4	4	118779937	118955940	0.185982	0.173534	0.176803	0.086228	-0.124383	-0.005189	0.266878	0.567301	-0.024277	-0.225245	0.003371	0.2812	0.049563	0.304747	-0.064183	0.055813	0.218735	0.136078	0.496677	-0.018157	-0.054289	0.365072	0.168688	0.663027	-0.429167	0.135505	0.04572	0.047148	-0.080968	0.371683	-0.02761	-0.273463	0.143813		10	5
RP11-100C9	4	120026667	120173757	0.022139	0.015896	0.205508	-0.02023	-0.017961	-0.185332	0.203061	0.63363	0.06345	-0.291139	-0.152494	-0.037249	-0.162699	0.151466	0.030772	0.002017	0.23379	-0.002023	0.099863	-0.144959	-0.004322	0.230572	0.030469	0.550255	-0.644613	0.077471	0.010303	-0.038207	-0.019432	0.44447	-0.166775	-0.127908	0.26862		10	4
RP11-364P2	4	122628107	122798333	-0.002809	-0.124048	0.114718	-0.118743	-0.110093	-0.090855	-0.024379	0.070579	0.118705	-0.294403	0.093983	0.0430573	-0.26708	0.074783	-0.278779	0.050798	0.061173	-0.030762	0.186698	-0.140722	-0.076085	0.052535	-0.175398	0.406387	-0.801291	0.009458	-0.008682	-0.065372	0.075813	0.128254	-0.138681	0.135925	-0.113901		10	4
RP11-381N20	4	124690494	124815644	-0.004783	0.063642	0.162431	-0.009108	0.003754	-0.215095	0.190844	0.590951	-0.02778	-0.201081	-0.118264	-0.026894	0.107123	0.076709	0.148991	0.029021	0.144583	0.175561	-0.019899	-0.034274	0.193128	0.091582	0.078134	0.532774	-0.56753	0.044801	-0.080463	0.065523	-0.033466	0.440931	0.124138	0.022943	0.266461		10	4
RP11-93I21	4	125651910	125808477	0.0257084	-0.023205	0.112139	-0.088252	0.014417	-0.172795	0.100811	0.5244	-0.098004	-0.380661	-0.07707	-0.072387	-0.19909	0.128429	-0.09484	0.006325	0.096764	0.192836	0.090027	0.079499	0.074887	0.100842	0.034929	0.560132	-0.652187	0.003901	-0.048599	0.058032	0.018349	0.38145	-0.142127	-0.257564	0.255259		10	4
RP11-15O17	4	126492867	126657913	0.024899	0.026252	0.270012	0.07347	0.019435	-0.009293	0.29359	0.730404	0.113698	-0.31329	0.030604	-0.037847	-0.089513	0.155134	-0.01063	-0.047568	0.14931	0.076108	0.722762	-0.000506	-0.010953	0.138777	0.116652	0.586588	-0.486247	0.051669	-0.151533	-0.075756	-0.056885	0.401792	-0.046102	0.000879	0.393044		10	4
RP11-282B13	4	127388596	127572716	0.150901	-0.060629	0.197073	-0.017696	-0.02039	-0.22966	0.291092	0.712433	-0.064819	-0.381597	-0.149553	0.095917	-0.267675	0.178117	-0.03293	0.028792	0.230773	0.027054	0.355258	-0.051702	0.026479	0.350844	0.080028	0.607585	-0.660117	0.081617	-0.119985	-0.05821	-0.119077	0.46263	-0.008622	-0.032096	0.26691		10	4
RP11-555L17	4	129461149	129664299	-0.109855	-0.229607	0.065357	-0.036083	-0.105059	-0.124353	-0.038257	0.290508	0.047582	-0.114937	0.034987	-0.023197	-0.111679	0.021717	-0.021475	-0.059023	0.010015	-0.036385	0.65334	-0.019333	0.061176	-0.048092	-0.059984	0.202053	-0.326544	0.00138	0.152926	-0.159837	-0.02084	0.238643	0.142215	0.315937	0.204152		10	4
RP11-209D20	4	130139259	130260967	0.045134	0.112814	0.163033	-0.014698	-0.035394	-0.218206	0.288261	0.542277	-0.124218	-0.285115	-0.02216	0.003047	-0.092911	0.157886	0.041717	0.030931	0.204214	0.210747	0.371116	0.022802	0.098854	0.213019	0.135127	0.653277	-0.568144	0.076412	0.125095	0.082077	-0.157958	0.421863	-0.030972	0.157865	0.296241		10	4
RP11-125F12	4	131234239	131403209	0.0463899	-0.160091	0.04134	0.043244	-0.088252	-0.13375	0.130678	0.237047	-0.028266	-0.145453	0.044762	-0.048639	-0.076823	0.04882	0.148116	-0.064833	-0.004558	0.04585	0.091178	-0.058252	0.070345	0.023273	0.085466	0.271552	-0.172985	-0.053191	0.000137444	0.021908	-0.045069	0.147666	-0.0015829	0.511369	0.152261		9	4
RP11-24P18	4	131752589	131905426	-0.036972	-0.020435	0.100703	-0.093379	-0.02597	-0.291793	0.168727	0.601234	-0.083812	-0.364004	0.012214	-0.084844	-0.200707	0.110803	0.031102	-0.010501	0.050889	0.11842	-0.079529	0.011927	0.013987	0.119849	0.109966	0.607627	-0.655241	0.023923	0.057955	0.005329	-0.0256448	0.448974	-0.083721	0.107109	0.24526		9	4
RP11-314N14	4	132791710	132815732	-0.059903	-0.180214	0.055036	-0.035188	-0.036108	-0.278979	0.099161	0.547666	-0.117283	-0.149004	-0.182876	0.131723	-0.015477	0.004033	0.075798	0.010257	0.127736	-0.053888	-0.075438	-0.030747	0.0341122	0.16896	0.075956	0.532573	-0.467055	0.111025	0.072645	-0.076762	-0.001022	0.336933	-0.047971	0.000795111	0.254838		9	4
RP11-149A7	4	133802361	133974779	0.030483	0.001809	0.285512	-0.098555	-0.148574	-0.161747	0.284969	0.74109	0.007758	-0.294309	-0.087059	0.0185673	-0.109072	0.194971	-0.001439	0.055468	0.239663	0.013454	-0.002521	-0.048185	0.030814	0.353923	0.245051	0.647073	-0.446759	0.095148	0.114955	0.009835	0.006248	0.606233	-0.056841	0.032602	0.315745		9	4
RP11-335K21	4	134510229	134663025	-0.128132	-0.239201	0.093246	-0.073777	0.040266	-0.335329	0.117567	0.761376	0.197072	-0.275526	-0.055357	-0.026796	-0.271393	-0.013006	0.104015	0.038614	0.098232	8.3e-05	-0.046435	0.005091	-0.039895	0.088616	-0.098031	0.46933	-0.703419	0.07306	-0.118399	-0.167681	-0.067231	0.469545	-0.205289	0.015337	0.333509		9	4
RP11-127A9	4	136706263	136873273	0.164343	0.197815	0.414377	0.15746	-0.069266	-0.133568	0.430331	0.930891	0.124849	-0.131362	0.017426	0.062349	0.049915	0.394427	0.0154603	0.074343	0.38077	0.092715	0.14172	-0.125807	-0.070694	0.560204	0.180387	0.557251	-0.569576	0.281567	-0.0192063	-0.078102	0.033295	0.592501	-0.037337	0.280236	0.22008		9	4
RP11-63M2	4	138152570	138314469	0.074692	-0.112225	0.055837	0.081733	0.022617	-0.153988	0.133472	0.41824	-0.178399	-0.228427	-0.091658	-0.017123	-0.101657	0.183819	0.017027	0.049804	0.119721	0.119902	-0.026217	-0.15145	0.030699	0.169184	0.029376	0.506378	-0.603135	-0.012924	0.062076	-0.071241	-0.053238	0.408145	-0.006854	0.0957851	0.238961		9	4
RP11-425J20	4	138583895	138760921	-0.08331	-0.197427	-0.019268	-0.0794429	-0.068388	-0.161682	-0.009475	0.414625	-0.040883	-0.284709	0.014459	-0.105625	-0.143307	-0.029685	0.030537	-0.088143	-0.051742	-0.013206	0.00968	0.066116	0.116508	0.115288	-0.032361	0.4546	-0.63146	-0.055971	0.119886	-0.044716	0.027327	0.288607	-0.122404	0.251137	0.277065		9	4
RP11-98O2	4	139967515	140136083	0.021901	-0.002867	0.024837	-0.053218	-0.120959	0.156955	0.072339	0.383481	-0.027465	-0.103944	0.011083	0.0130917	0.129706	0.130903	0.105209	0.143495	0.097798	0.008166	0.262728	-0.091983	-0.027223	0.0314535	-0.078324	0.152041	0.008363	0.055436	-0.107967	-0.036401	0.051378	0.01532	0.242818	0.230851	0.039995		9	3
RP11-69O1	4	141741731	141912428	0.0229813	0.079944	0.240073	0.029658	-0.087588	0.00298175	0.297227	0.32994	-0.03331	-0.213521	-0.076423	-0.243952	-0.112843	0.117218	-0.005901	-0.019845	0.136535	0.187868	0.116978	-0.087455	-0.106738	0.07819	0.109123	0.656207	-0.106827	0.075852	-0.0130864	0.021692	0.175656	0.399194	0.187798	0.126587	0.271698		9	3
RP11-362F19	4	142539342	142725556	0.013127	0.115694	0.212519	0.011837	0.011234	-0.163575	0.241386	0.532694	-0.04688	-0.300612	-0.040384	0.121738	-0.10619	0.130023	0.0475059	0.040529	0.139889	0.158925	-0.130532	0.021111	0.069048	0.182286	0.040505	0.548278	-0.371492	0.251278	0.079306	-0.006103	0.222658	0.599031	0.310982	0.105401	0.415995		9	3
RP11-141I1	4	143878613	144047528	0.086673	0.069492	0.104613	0.017897	-0.019084	0.122698	0.225037	0.460478	-0.1284	-0.30655	-0.048807	0.091659	-0.20812	0.212516	-0.02567	0.035356	0.199848	0.307342	-0.045996	-0.024866	0.006354	0.363075	0.082926	0.593055	-0.106143	0.081716	0.186702	0.025334	0.022235	0.374709	0.497109	0.122698	0.11614		9	3
RP11-364L4	4	144506149	144671395	-0.177639	-0.249599	0.015509	-0.242727	-0.096275	0.069511	-0.04645	0.360643	-0.012937	-0.282226	-0.068506	-0.0168821	-0.115144	0.014985	0.005078	-0.061202	-0.069399	-0.100575	0.043807	-0.117961	0.039691	0.042983	-0.049823	0.253083	-0.2547	-0.002666	-0.247852	-0.082739	0.125853	0.361431	0.313694	0.01688	0.162842		9	3
RP11-301H24	4	146696702	146862630	0.05683	-0.141248	0.008579	-0.258437	0.059745	0.119989	0.041209	0.473552	-0.129531	-0.522571	0.09392	-0.211586	-0.250368	-0.038805	-0.151802	-0.034935	-0.05996	0.082046	-0.035811	0.079744	0.147021	0.029827	-0.003486	0.415338	-0.191639	-0.065948	0.062773	0.049933	0.037315	0.386268	0.039182	0.026083	0.311095		9	3
RP11-181K12	4	147067988	147227956	-0.09933	-0.071214	0.031999	-0.155227	-0.009701	0.135706	0.069903	0.348817	-0.000851	-0.1869	-0.039736	-0.099392	-0.098196	-0.065259	-0.049024	-0.044731	0.0436	0.137762	-0.125415	0.021628	0.046644	0.012714	-0.056408	0.483125	-0.164805	-0.015259	0.17577	-0.031197	-0.068526	0.316481	-0.014173	0.193366	0.382437		9	3
RP11-425A23	4	148892788	149090012	-0.018332	0.131008	0.18083	-0.012885	-0.006866	0.057666	0.195025	0.445849	0.033374	-0.166761	0.030945	-0.012238	-0.032038	0.052831	0.130619	0.05877	0.163228	0.247141	-0.009273	0.015214	0.06396	0.11977	0.065672	0.561256	-0.463431	0.029231	-0.031703	0.095677	-0.087957	0.458764	0.112699	0.118712	0.280996		9	3
RP11-503L19	4	149903050	150036580	-0.0244204	-0.281112	0.072702	-0.160258	-0.023819	-0.0496375	0.127303	0.352132	-0.169959	-0.641411	-0.07675	-0.191893	-0.337203	0.048267	-0.099701	-0.089373	-0.058217	-0.059795	-0.112576	0.015248	-0.009084	0.095533	0.009077	0.48401	-0.299948	-0.033882	0.047662	-0.035291	-0.08803	0.219691	-0.109276	0.003059	0.115453		8	3
RP11-481K13	4	150719484	150875107	-0.0118483	0.062436	0.119568	-0.01849	0.078822	-0.107436	0.22245	0.469885	-0.038088	-0.284418	0.18881	-0.096217	-0.127724	0.077828	0.011342	-0.025985	0.09591	0.092227	0.09654	0.093398	-0.052671	0.142784	0.03426	0.600857	-0.455628	-0.013925	0.073505	-0.03778	-0.024782	0.246812	-0.142045	0.390641	0.181991		8	3
RP11-64M20	4	151669487	151670175	-0.161431	-0.925274	-0.09512	0.08471	-0.319691	0.165176	-0.214105	-0.205784	-0.016317	-0.464448	-0.353132	-0.128165	-0.24036	-0.063005	0.348555	0.007016	0.007363	-0.019239	-0.161737	-0.17654	-0.01559	-0.219765	-0.120801	-0.095971	-0.331357	-0.031008	0.34627	-0.022626	-0.004199	-0.031469	-0.140379	0.012193	-0.340706		9	4
RP11-28E24	4	151985318	151985924	0.128861	0.146039	0.236768	0.040284	-0.291115	0.132084	0.343959	0.615565	-0.012295	-0.218295	0.024982	0.145283	-0.215204	0.212513	0.117786	0.015514	0.32018	0.255015	-0.032054	-0.030375	-0.002148	0.32775	0.107632	0.696022	-0.315341	0.20556	0.064239	0.049605	-0.098584	1.04738	0.321965	0.113967	-0.120046		9	4
RP11-164P12	4	152904998	153046191	0.040801	-0.172062	0.021868	-0.149013	0.019086	0.153272	0.07811	0.372922	-0.067527	-0.282472	-0.050507	-0.098188	-0.109699	-0.021449	0.089547	0.050696	0.039027	0.172085	-0.143051	-0.082308	0.047371	0.040187	-0.023738	0.555759	-0.474232	-0.017661	0.044193	-0.025943	-0.070169	0.897475	-0.188019	0.00665	-0.204548		9	4
RP11-503L23	4	153101314	153187832	-0.130708	-0.213106	-0.029981	-0.201619	-0.124086	0.191322	0.021577	0.263086	-0.030657	-0.475357	-0.02439	-0.155886	-0.227685	-0.142148	-0.046211	-0.039229	-0.034863	0.172474	-0.125842	0.014216	0.089522	0.036589	-0.015099	0.481744	-0.517794	-0.033581	0.224582	0.000619	-0.068654	0.880673	0.04907	0.0705	-0.300968		9	4
RP11-259G7	4	154996599	155197703	-0.053268	-0.128061	0.019924	-0.257549	-0.056667	0.132141	0.119376	0.313879	-0.088844	-0.341621	-0.070886	-0.046451	-0.146761	0.002257	0.711161	-0.026855	0.039599	0.222749	-0.125291	0.017487	0.01851	0.072142	-0.036812	0.515196	-0.512913	0.00202	0.268081	0.046091	-0.095017	0.948575	0.294171	0.027977	-0.236736		9	4
RP11-27G13	4	156512000	156690203	0.094928	0.059187	0.207822	-0.0161488	0.015537	0.103296	0.342465	0.433734	0.028683	-0.241133	-0.077366	0.0380541	-0.224993	0.17128	0.076943	0.065784	0.191808	0.137969	0.018141	-0.075488	-0.110874	0.202304	-0.082987	0.558484	0.017368	0.108741	0.008138	-0.157891	-0.01477	1.04508	-0.072908	0.023936	-0.083009		9	3
RP11-264E11	4	156762525	156916499	0.045461	0.020013	0.131826	-0.089674	0.095936	0.07887	0.152077	0.420541	-0.081198	-0.326913	-0.042407	-0.040872	-0.124095	0.097127	0.867061	-0.021616	0.139292	0.309595	-0.074703	0.027573	0.034686	0.143539	0.033011	0.592439	0.055942	0.014016	0.121048	-0.044688	-0.10904	1.0215	-0.142686	0.114009	-0.222508		9	3
RP11-171N4	4	157803509	157976497	0.110845	0.052399	0.192478	0.178764	0.036039	0.0980861	0.273293	0.430342	0.060981	-0.288624	-0.010754	-0.209979	-0.065166	0.176029	0.997349	0.02338	0.218208	0.088182	0.017721	-0.145774	-0.035805	0.224743	0.04109	0.57472	0.100115	0.121105	-0.038673	-0.035943	0.018808	0.962133	-0.122423	0.141369	0.074133		9	3
RP11-17C4	4	158714192	158893684	0.053843	-0.158228	0.12435	-0.091814	-0.015909	0.005264	0.137892	0.351116	0.069186	-0.384548	0.307649	-0.051561	-0.143981	-0.004975	0.366506	-0.014118	0.147919	-0.068914	0.032079	-0.041636	-0.049457	0.120367	-0.02719	0.504562	0.075317	0.025523	0.05429	-0.158246	-0.081785	0.911284	0.178491	0.0662495	-0.223034		9	3
RP11-6C14	4	161051318	161193397	0.053754	-0.206097	0.077158	-0.018451	0.037718	-0.037674	0.018457	0.045478	0.126659	-0.23308	0.001329	-0.036626	-0.127945	-0.016356	-0.173869	-0.132597	0.024202	0.081477	0.013189	-0.061189	-0.091951	0.068203	-0.167903	0.335896	-0.105751	0.015562	-0.058665	-0.072929	-0.025909	0.467987	-0.068005	0.060757	-0.111399		8	3
RP11-1G8	4	163606001	163749613	0.037623	0.115612	0.067742	-0.055784	-0.041412	0.127692	0.095769	0.259256	-0.178824	-0.271473	-0.03525	-0.035915	-0.195991	0.426461	-0.207433	0.006908	0.152856	-0.020271	-0.066949	-0.117492	-0.12294	0.161248	0.110534	0.341027	-0.08394	0.081033	-0.445113	0.09383	-0.078632	0.499952	0.072351	-0.1694	-0.208514		8	3
RP11-218F10	4	164665396	164826248	-0.048289	-0.119745	-0.0493	-0.247151	-0.39004	0.11454	-0.110575	0.033592	-0.182731	-0.044629	-0.064811	-0.129206	-0.174012	-0.016901	-0.234159	-0.135451	-0.032417	-0.197258	-0.322071	-0.210189	-0.090195	-0.018281	0.018144	0.379557	0.041427	0.012803	0.0267233	-0.008361	-0.092157	0.660358	0.082424	-0.100802	-0.383172		8	3
RP11-336N6	4	166378703	166557081	0.005452	0.082671	0.258986	-0.01893	0.069164	0.0386557	0.290158	0.453443	-0.0343	-0.325072	-0.066951	0.0173043	-0.032697	0.120371	0.057026	0.086854	0.142498	0.225423	-0.300962	-0.014868	0.111725	0.149296	-0.036023	0.596378	-0.217831	0.045912	-0.259956	0.055812	-0.075383	0.930583	0.136907	-0.083487	-0.0123125		8	3
RP11-25N12	4	166878298	167055857	0.046825	-0.202397	0.162806	-0.01341	-0.103641	0.207302	0.156096	0.371741	-0.105731	-0.446519	0.003264	0.08218	-0.194723	0.232619	-0.02071	0.004666	0.132361	-0.077049	-0.432461	-0.068049	-0.047595	0.159598	0.039389	0.566557	-0.060887	-0.014907	0.127934	0.020508	-0.09197	0.864599	0.181009	-0.107851	-0.348728		8	3
RP11-440L13	4	167983509	168157329	-0.091214	-0.130088	0.115368	-0.07013	0.022385	0.054938	0.059996	0.147205	0.05309	-0.20961	-0.039703	-0.099339	-0.072716	0.078239	0.103197	-0.038057	-0.016678	-0.128901	-0.039963	-0.090976	-0.040618	0.070833	-0.085655	0.132135	0.005545	-0.015854	-0.0751	-0.087668	-0.041009	0.408095	0.191575	0.12887	0.0364047		8	3
RP11-275K4	4	170762430	170917949	0.0613641	-0.060967	-0.045267	-0.0316	-0.00434	0.379711	0.113488	0.130376	-0.070294	0.0325279	-0.213709	-0.041309	0.095343	0.351174	0.430842	-0.037211	0.15677	-0.018991	0.13585	-0.039056	-0.113899	0.0502077	0.040264	0.526309	-0.032097	0.125402	0.060826	0.060343	-0.016815	0.369267	-0.040879	0.101781	-0.267881		9	3
RP11-13N11	4	172096650	172262953	0.045723	0.260477	0.17566	0.001667	-0.070195	0.178025	0.262475	0.467215	0.132472	-0.390171	-0.05355	0.09788	-0.274464	0.124353	1.03208	-0.057788	0.153768	-0.124553	-0.535444	-0.144242	-0.084975	0.260814	0.059374	0.621868	-0.344238	0.109361	-0.307665	-0.07681	-0.198843	1.01846	-0.381731	-0.149928	-0.249513		9	4
RP11-384D10	4	172346461	172517322	0.056861	0.193244	0.034911	-0.122679	-0.103485	0.283438	0.265402	0.323593	-0.023993	-0.41806	-0.20656	0.145529	-0.280256	0.031264	0.995405	-0.086206	0.11294	-0.034878	-0.612441	-0.128425	-0.128311	0.240597	-0.032548	0.522056	-0.420523	0.047527	0.044149	-0.065778	-0.143523	0.987686	-0.385803	0.175696	-0.148112		9	4
RP11-119J20	4	173378778	173548334	-0.025415	0.193846	0.312782	0.077308	0.119498	0.098936	0.203313	0.377952	0.033378	-0.083725	0.234715	0.170505	-0.172579	0.346946	0.202145	0.157925	0.140567	0.048106	-0.332421	-0.059495	0.008276	0.128541	0.118981	0.457959	-0.172083	0.0969401	9e-05	0.000896	-0.028589	0.785343	0.0923678	0.240847	0.0138453		9	4
RP11-140M23	4	174098250	174275177	-0.016677	0.357167	0.16761	-0.051216	0.13511	0.109238	0.093092	0.250171	0.083273	-0.231802	0.449425	0.052376	-0.207943	0.046486	-0.086071	0.062004	0.024097	-0.104534	-0.470268	-0.049951	-0.051407	0.0121	-0.031907	0.49375	-0.343747	0.002256	0.04386	-0.06091	-0.042914	0.979067	0.188119	0.21202	-0.111497		9	4
RP11-148L24	4	175479334	175626720	0.05951	0.204017	0.117747	-0.116549	-0.149439	0.118734	0.06956	0.326513	0.121546	-0.243333	0.101851	0.030398	-0.117889	0.079939	0.411843	0.022903	0.064592	-0.206282	-0.232771	0.031151	0.011787	0.147532	0.106017	0.565392	-0.207492	0.045855	0.194487	0.089718	-0.137566	0.900417	-0.154599	0.158984	-0.206586		9	4
RP11-287F9	4	176485514	176706391	0.213194	-0.086004	-0.130835	-0.063929	-0.199052	0.043466	0.055065	0.024167	0.174553	-0.248263	0.045078	0.015831	0.067397	0.106762	0.31792	-0.104216	-0.010255	-0.208998	0.150981	0.005033	-0.016479	0.053192	-0.003298	0.185689	-0.378171	-0.043781	0.025371	0.138148	-0.018732	0.173606	-0.059592	0.374962	-0.280546		8	4
RP11-87F15	4	177544051	177761971	-0.086507	0.036765	0.14983	-0.030856	-0.11696	0.04548	-0.08071	-0.037694	-0.048179	-0.166302	-0.037249	-0.0347329	-0.128756	0.234646	0.377599	0.018182	-0.091823	0.004009	-0.128557	-0.167871	-0.145522	-0.0671259	-0.080744	0.0490445	-0.492987	0.018863	0.185815	-0.008164	-0.036136	0.196537	0.024348	-0.115128	-0.228607		8	4
RP11-84H6	4	179544249	179720256	0.196786	0.0807911	0.147064	0.082614	-0.103415	0.193904	0.38604	0.26494	-0.157206	-0.392427	-0.03899	0.110619	-0.136161	0.307659	0.19328	0.137634	0.213355	0.126235	-0.381546	0.006559	-0.038295	0.425875	0.170111	0.610463	-0.30661	0.177003	0.190514	0.044455	-0.089475	0.840984	0.58385	0.190187	-0.186089		8	4
RP11-495H13	4	179972961	180144705	0.060323	0.214061	0.090025	-0.141248	-0.114025	0.144773	0.091454	0.203862	0.114791	-0.417054	0.002203	-0.074954	-0.128478	0.072111	0.401062	-0.030015	0.087507	-0.438497	-0.385955	0.023317	-0.118187	0.122778	-0.052845	0.550878	-0.406125	0.062027	0.053147	-0.147691	-0.055047	0.872556	0.455518	0.078299	-0.186446		8	4
RP11-226A18	4	182163858	182315896	-0.010546	0.507081	0.242458	0.101597	0.016477	0.11982	0.271462	0.324435	-0.10653	-0.393899	-0.050411	-0.018219	-0.205592	0.136901	0.467214	0.040998	0.150612	-0.256318	-0.571986	-0.096463	-0.028617	0.146504	0.115764	0.672506	-0.08432	0.11822	0.012654	-0.020285	-0.118435	1.01011	-0.15004	0.0709543	-0.307428		8	4
RP11-62B7	4	182651648	182690059	-0.027107	0.223035	0.024046	-0.074276	-0.014051	0.11718	0.052646	0.233699	0.077092	-0.209121	-0.013441	-0.032878	-0.123336	-0.027801	0.202738	0.038437	0.052867	-0.357799	-0.298511	-0.152606	-0.058259	0.023136	0.017434	0.329535	-0.016722	-0.038605	0.049485	-0.047612	-0.043926	0.809333	-0.154685	0.164847	-0.033409		7	4
RP11-59I16	4	184371085	184542576	-0.098917	-0.41332	0.135241	-0.130748	0.025185	0.043347	0.028015	0.262856	0.16811	-0.204495	-0.094061	-0.077246	-0.192265	-0.020592	0.426801	-0.015759	0.090474	-0.508027	-0.174244	-0.067003	-0.178513	0.080283	-0.0531	0.175582	-0.452496	-0.004077	-0.046798	-0.025954	-0.044813	0.766382	-0.21755	0.034281	-0.076055		7	4
RP11-228F3	4	186010493	186178380	0.005384	-0.000581	-0.023675	-0.027192	0.023282	0.167152	0.104312	0.108059	-0.134014	-0.303977	-0.135767	-0.079026	0.051901	0.034332	0.010549	0.055078	0.096351	-0.158631	-0.027814	-0.073475	-0.024288	0.060199	-0.057594	0.371336	-0.223475	-0.024325	0.0362559	0.079862	-0.07646	0.578083	-0.049301	0.255983	-0.426895		5	3
RP11-301L8	4	186790733	186960546	-0.004408	-0.230695	-0.034949	-0.009391	-0.055187	0.016499	0.03616	0.006588	-0.145625	-0.342519	-0.101317	-0.040779	-0.079324	0.103992	-0.010809	-0.004873	-0.013619	-0.235963	-0.06154	-0.049018	-0.100562	0.019115	-0.02684	0.281516	-0.253961	0.009894	-0.104025	-0.01394	-0.102727	0.507981	0.06128	-0.044049	-0.456261		5	4
RP11-91J3	4	188660399	188815082	0.142389	-0.370868	-0.197685	0.127312	-0.154578	0.296211	0.143961	-0.085682	0.092178	-0.220814	-0.038572	0.102548	0.00322	0.251454	0.100788	0.182275	0.131528	0.129351	0.105795	-0.11651	-0.094569	0.169504	-0.09975	0.275484	-0.075825	0.129295	0.240757	0.030399	-0.043794	0.461184	-0.157882	0.356071	-0.00390667		6	2
RP11-347K3	4	189838663	189919098	-0.122479	-0.406247	0.338738	-0.121395	-0.112432	0.090532	0.009048	0.207587	0.001331	-0.424874	-0.04849	-0.0703158	-0.203831	0.048038	-0.030424	-0.003664	0.050042	-0.635538	-0.001319	-0.127867	-0.189463	0.0578481	0.013853	0.294777	-0.021366	-0.020368	0.0300633	-0.134943	-0.007072	1.18248	-0.224335	-0.009324	0.249934		6	2
RP11-45F23	4	190658161	190806578	0.683665	-0.401294	0.29746	-0.0231	-0.025005	0.0707232	0.097006	0.262862	0.280748	-0.555729	-0.009582	-0.249981	-0.069626	0.003641	-0.393758	0.074662	0.133712	-0.488117	0.006622	-0.070791	-0.209926	0.101585	-0.075926	0.371415	-0.08174	0.025237	0.015633	-0.136995	0.130942	1.23824	-0.171116	-0.043385	-0.0271808		5	2
CTC-963K6	4	191076762	191158370	-0.200046	-0.802548	0.203637	-0.275766	-0.069634	0.218257	-0.022141	0.215458	0.236628	-0.291097	0.042904	-0.112292	-0.108904	-0.174172	-0.449108	-0.045164	0.087628	-0.54304	-0.081156	-0.0501895	-0.127936	0.0099015	-0.010488	0.230907	-0.08279	0.035768	0.166141	-0.423759	0.076413	0.578025	-0.448568	-0.022279	0.40558		4	2
CTD-2265D9	5	2570683	2725000	0.30938	-0.239735	-0.597257	-0.200842	0.120971	-0.208411	-0.202677	0.046943	-0.447452	0.319369	-0.076343	-0.021891	-0.171751	0.310417	-0.014428	-0.151461	-0.014224	0.010421	-0.044255	-0.063427	-0.110864	0.21616	-0.077721	-0.16499	-0.13682	0.162487	0.075285	-0.076213	0.118805	0.356359	0.363038	-0.275777	-0.403378		7	4
RP11-20K9	5	3172060	3340431	0.305118	-0.200294	-0.629335	-0.216394	0.134968	-0.23335	-0.234815	0.020028	-0.566921	0.250594	-0.051851	-0.009137	-0.160653	0.196096	0.016393	-0.140683	-0.136143	-0.030916	-0.067577	0.018363	0.0423	-0.080963	-0.073218	-0.0823633	-0.062896	0.070087	0.11003	-0.006928	0.146988	0.313635	0.304739	-0.114778	-0.574836		6	4
RP11-121L11	5	3425994	3597253	0.245279	-0.082966	-0.181405	0.008727	0.118121	0.069158	-0.071929	0.149923	-0.047665	0.121741	-0.110026	0.131276	-0.028595	0.304457	-0.167928	-0.039464	0.013695	0.04312	0.08208	-0.071321	-0.071018	0.084049	-0.063183	0.09497	-0.070159	-0.006996	-0.208553	0.001787	0.015978	0.14426	0.03967	0.04311	-0.072145		6	4
RP11-137P5	5	5500098	5687008	0.506107	0.108882	-0.61226	-0.284319	0.122557	-0.261784	-0.224071	0.103957	-0.608898	0.579875	0.415358	-0.046321	-0.166877	0.310996	-0.127334	-0.198008	-0.199489	0.109661	-0.010972	0.070001	0.050316	-0.000334	-0.03118	-0.152636	0.158347	0.092394	0.123228	0.035946	0.105649	0.068596	0.380978	0.084203	-0.227738		7	4
RP11-245L6	5	5879129	6020335	0.542658	0.393697	-0.417224	-0.09319	0.251706	-0.308325	-0.086824	0.082247	-0.570298	0.51146	0.305813	0.081838	-0.125996	0.473733	0.074519	-0.133232	-0.034315	0.242947	-0.053962	-0.027673	0.007457	0.058374	0.037759	0.005746	0.135049	0.146584	0.061978	0.039074	0.092154	0.095665	0.435923	-0.058734	-0.311556		8	4
CTD-2324F15	5	6304690	6430015	0.421932	0.244693	-0.549881	-0.134616	0.132464	0.390876	-0.173091	-0.048226	-0.588219	0.631161	0.195664	0.054611	-0.191595	0.367956	0.006477	-0.110809	-0.042757	0.197691	-0.119247	0.014426	-0.020979	-0.026081	-0.075245	-0.165047	0.057784	0.081957	-0.046391	0.001106	0.102637	0.064018	0.378661	-0.157969	-0.296423		9	4
RP11-114M17	5	6515876	6708632	0.264353	0.186165	-0.540253	-0.244876	0.239262	0.365626	-0.24783	0.009014	-0.335797	0.768643	0.36295	-0.081502	-0.098397	0.29178	0.00154267	-0.159683	-0.125601	0.008484	0.096957	-0.148186	-0.104117	-0.034312	-0.226546	-0.05325	0.026539	0.07894	0.0213898	-0.005382	0.217789	0.008181	0.414153	0.031153	0.048401		9	3
CTD-2346M20	5	7426758	7530112	0.311188	0.10358	-0.53777	-0.143879	0.132871	0.418105	-0.235502	0.023364	-0.013679	0.378001	0.315027	0.071855	-0.24119	0.291053	0.087998	-0.151785	-0.141392	-0.066141	0.029694	-0.0589841	0.011127	0.129802	-0.058612	-0.271996	0.174085	0.032291	-0.029388	0.038806	0.11627	0.060571	0.338774	-0.093708	0.236485		10	3
RP11-132J20	5	8413255	8600646	0.268128	0.118847	-0.380185	-0.033449	0.10583	0.357543	-0.107403	0.055734	-0.306247	0.551002	0.190452	-0.009182	-0.191858	0.332955	-0.0135442	-0.0860344	-0.0252174	0.04551	0.055266	-0.0425656	-0.048428	0.0775459	-0.154721	-0.145234	0.072383	0.139639	-0.050685	-0.00537	0.101239	0.016045	0.26139	-0.003627	0.420076		10	3
RP11-32D12	5	9436026	9606181	0.59348	0.36698	-0.316878	-0.06413	0.281756	0.340268	-0.074244	0.080184	-0.813644	0.739918	0.281234	0.146737	-0.221621	0.431359	0.02877	-0.125573	0.044491	0.200128	-0.077479	-0.072953	0.010492	0.090575	0.020542	-0.063322	0.15437	0.228401	0.137072	0.039587	0.118544	0.111292	0.388615	-0.144349	0.249024		10	3
CTD-2274H20	5	10359620	10495937	0.203428	0.471111	0.052674	0.069884	0.026111	0.21944	0.052723	0.092889	0.137505	0.728614	0.290434	0.0213374	0.382496	0.318218	0.322321	-0.092022	0.093363	0.259332	0.082398	0.0437957	-0.006278	0.041592	0.009235	0.219858	0.159391	0.163919	-0.067189	0.07657	0.071106	0.143886	0.220043	0.224283	0.215701		12	3
RP11-215G15	5	10644705	10722894	0.380807	0.342348	-0.267993	-0.002053	0.226059	0.403961	-0.16908	0.046182	-0.039206	1.04012	0.251452	0.108961	0.178228	0.417873	0.039927	-0.108551	0.049535	0.221454	-0.060601	0.030641	0.057737	0.075455	-0.052694	-0.075452	0.06673	0.195182	0.017474	0.154374	0.109064	0.09362	0.470433	-0.151621	0.345338		10	3
RP3-502L6	5	10925533	11148940	0.308459	0.352084	-0.382967	-0.314658	0.081628	0.395277	-0.294681	-0.105569	-0.70844	0.979315	0.408573	-0.064024	-0.115849	0.184484	-0.023451	-0.234067	-0.220206	0.251632	-0.004644	0.082772	0.040207	-0.06178	-0.064843	-0.15829	0.134934	0.09001	0.231225	0.058524	0.14301	0.014926	0.426079	0.167316	0.453584		10	3
RP11-44C2	5	12130015	12216435	0.490962	0.339416	-0.261395	-0.127607	0.073045	0.278576	-0.176992	0.165888	0.327175	0.639037	0.234081	0.105876	-0.32956	0.450731	0.039549	-0.144323	-0.022473	-0.186922	0.068651	-0.084466	-0.093545	0.167908	-0.066459	-0.0779413	0.153328	0.162854	-0.134197	-0.056229	0.128216	0.760141	0.34828	-0.241582	0.261164		12	2
RP1-64M18	5	12171046	12262939	0.107995	0.168749	-0.067139	-0.117438	-0.158544	0.182293	-0.094644	-0.117579	-0.168346	0.206462	0.096263	0.090935	-0.110211	0.419624	-0.108443	-0.003315	-0.031945	-0.144706	0.244689	-0.115506	-0.051376	0.137418	0.03397	-0.115588	-0.148843	0.071046	-0.203698	0.007386	0.019341	0.181373	0.146528	-0.073335	0.01429		12	2
RP11-269G2	5	13256877	13346110	0.51523	0.67381	-0.100043	0.007263	0.151881	0.473378	-0.082687	0.087976	1.16343	0.527082	0.319645	0.173629	-0.190166	0.554969	-0.009442	-0.09461	0.049489	0.057464	0.123181	0.013166	-0.07786	0.141298	0.13504	0.015947	0.197704	0.116524	0.09548	0.093615	0.123641	0.820951	0.440836	-0.231701	0.273387		15	2
RP11-415K6	5	14596450	14781468	0.46334	0.554158	-0.340823	-0.147325	0.172472	0.309346	-0.199181	0.163282	0.775713	0.787092	0.281064	0.093453	0.047443	0.337979	0.007489	-0.089442	0.03078	0.149968	-0.012696	0.040913	0.056404	0.058935	-0.001021	-0.105387	0.394818	0.111905	0.216071	0.169088	0.126214	0.743186	0.421152	-0.0785654	0.341669		15	2
RP1-137K24	5	15191411	15315356	0.548596	0.504159	-0.229631	-0.044678	0.116071	0.339955	-0.0678253	0.188395	0.022523	0.712567	0.320652	0.169578	-0.183605	0.389382	0.046251	-0.137784	0.092737	0.008061	0.011862	-0.019537	-0.103816	0.072807	-0.021203	-0.020303	0.387317	0.116502	0.002292	0.011123	0.204213	0.796913	0.340093	-0.182953	0.250813		16	2
RP11-19O2	5	16193635	16358453	0.579992	0.679698	-0.257045	-0.03133	0.191612	0.0163452	0.048782	0.226123	0.142319	0.49587	0.261137	0.15839	-0.135166	0.525089	0.044546	-0.028138	0.14369	0.167467	0.071008	-0.050251	-0.014237	0.226998	-0.069121	-0.0115344	0.381229	0.166724	-0.13257	0.001359	0.111146	0.864069	0.347423	-0.013765	0.253287		15	3
RP1-167G20	5	16354087	16529263	0.536726	0.483863	-0.256837	-0.202803	0.23798	-0.080298	-0.153786	0.185795	0.688699	0.756225	0.381832	0.036455	-0.195185	0.426448	0.093309	-0.117164	-0.00261	0.071778	0.095601	-0.015681	-0.004303	0.047718	-0.088121	-0.037294	0.343959	0.151694	0.064822	0.029759	0.106089	0.771283	0.369191	-0.077702	0.294912		15	3
RP11-21H5	5	16365822	16546966	0.474147	0.490318	-0.187376	-0.097641	0.163122	-0.07935	-0.121039	0.150458	0.63145	0.742476	0.255773	0.113516	-0.114563	0.477085	0.125117	-0.0843	0.033713	0.073303	0.091471	-0.041381	-0.102687	0.112219	-0.032562	0.013889	0.254574	0.171448	-0.038195	0.045048	0.117236	0.82056	0.383974	-0.070807	0.286854		15	3
RP11-260E18	5	16623433	16775408	0.112248	0.104234	-0.240215	-0.225127	-0.029817	0.020192	-0.015295	-0.089108	0.290038	0.259288	-0.091021	-0.004722	-0.059133	0.508061	-0.115672	-0.076629	-0.111389	-0.109193	0.367045	0.012617	0.04229	0.107298	0.241834	0.042242	0.239274	0.052232	-0.028312	0.184966	0.057102	0.277792	0.310754	-0.044487	0.253233		15	3
RP11-553J15	5	17110139	17284381	0.384423	0.465139	-0.24813	-0.148319	0.275467	-0.033728	-0.086092	0.205635	0.076668	0.824497	0.28496	-0.054398	0.096216	0.452751	0.132521	-0.153577	0.062149	0.216954	0.113355	-0.046099	0.005465	0.179549	-0.026764	0.10906	0.359453	0.111396	-0.089979	0.217974	0.067712	0.604991	0.427022	0.042781	0.506061		15	3
RP11-28P24	5	19642866	19781395	0.507537	0.628064	-0.155808	-0.018142	0.164446	-0.049612	0.011861	0.098132	-0.256198	0.16896	0.332471	0.132747	-0.15997	0.472256	0.007905	-0.121774	0.101163	0.296177	0.270099	0.0627	-0.005796	0.15282	0.164463	0.073781	0.156864	0.238585	0.062725	0.123248	0.0898934	0.492114	0.476857	0.014052	0.216339		16	4	2.82597	5p
RP11-414I19	5	20414929	20595579	0.441589	0.69567	-0.088079	-0.017625	0.174603	-0.015597	0.061113	0.297181	-0.435541	0.1969	0.347046	0.136738	-0.132961	0.671188	0.108009	-0.046627	0.214924	-0.026327	0.49207	-0.027626	-0.102067	0.286529	0.147544	0.133853	0.092761	0.316936	0.0226936	0.086159	0.03809	0.703479	0.511514	0.100979	0.348371		16	4
RP11-374E21	5	21573362	21757136	0.474506	0.632938	-0.31149	-0.080881	0.118836	-0.089765	0.113515	0.324503	-0.196036	0.209871	0.136321	0.409004	-0.109909	0.562632	0.070344	-0.216094	0.26158	0.173098	0.368533	-0.09305	0.01314	0.341006	0.118378	0.152931	0.106874	0.327302	0.00620043	0.090639	0.03386	0.610829	0.457236	-0.026361	0.393294		16	4
RP11-26L18	5	22309935	22468834	0.524877	0.634804	-0.12023	-0.027059	0.172441	0.008084	0.052218	0.191199	-0.194587	0.258365	0.232023	0.25056	-0.094025	0.583649	0.044671	-0.079022	0.150011	0.109811	0.382375	-0.055081	-0.044699	0.23785	0.020538	0.084164	-0.021429	0.252297	0.00928957	0.055973	0.055717	0.561741	0.432793	0.059974	0.279551		16	4
RP11-57I6	5	23644140	23795207	0.202832	-0.039136	-0.219255	-0.136081	0.013243	-0.020272	-0.047123	0.310467	-0.231779	-0.059286	0.175527	0.063905	-0.19163	0.36278	-0.147313	-0.174355	0.073983	-0.017224	0.71499	-0.117922	-0.055845	0.236906	-0.088982	0.084782	-0.23623	0.082827	-0.048712	-0.007271	-0.046825	0.320494	0.118857	0.121485	-0.060535		15	4
RP11-192H6	5	25187395	25333181	0.485931	0.745047	-0.578849	-0.005686	0.024339	0.101897	0.018325	0.16856	-0.490043	0.392792	0.126702	0.145421	-0.146885	0.518553	0.015648	-0.080195	0.235984	0.128024	0.424864	-0.165228	-0.116707	0.601125	0.114568	-0.352029	0.468313	0.208457	-0.019332	0.082611	0.132072	0.520083	0.351903	-7.4e-05	0.0385274		15	5
RP11-351N6	5	26353438	26539899	0.449294	0.592283	-0.248013	0.025491	0.131744	-0.095339	-0.079651	0.144782	-0.383037	0.050069	0.220837	0.177171	-0.198653	0.319341	0.062436	-0.076813	0.047235	0.118843	0.375582	-0.067267	0.03243	0.430869	0.076089	-0.221263	0.477089	0.228812	0.085626	0.041614	0.131466	0.385229	0.248463	0.078312	-0.211882		15	5
CTD-2219P12	5	27359951	27463814	0.56233	0.332562	-0.082255	0.093654	0.143324	-0.002403	0.115056	0.573625	-0.30254	0.60069	0.312734	0.206202	-0.110194	0.600777	0.130386	-0.111232	0.231684	0.102451	0.390127	-0.006149	-0.017253	0.595059	0.10294	-0.277023	0.620111	0.386084	-0.018083	-0.009738	0.078009	0.626147	0.407577	-0.075536	-0.183713		15	5
RP11-46C20	5	27487151	27641964	0.35984	-0.047508	-0.389506	0.035199	0.239451	0.169385	0.191268	0.483195	0.039222	0.304154	0.10511	0.083107	-0.150701	0.584793	-0.046714	-0.127412	0.165991	-0.005737	0.25799	-0.108664	-0.064071	0.492889	0.033888	-0.489552	0.18185	0.162976	-0.250493	-0.045846	0.073616	0.36974	0.21828	-0.022734	0.00548637		15	5
RP11-37M16	5	28750780	28917994	0.454637	0.637594	-0.224564	-0.010753	0.223494	0.000972	-0.063387	0.444386	-0.308128	0.365782	-0.029692	0.0520934	-0.169454	0.358098	0.011249	-0.159632	0.087092	0.07794	0.451778	-0.070209	-0.090871	0.453393	0.222653	-0.496301	0.502995	0.200891	0.017166	-0.026809	0.229718	0.487781	0.259172	0.019097	-0.162485		15	5
RP11-16A6	5	31326937	31504934	0.468047	0.481582	-0.224459	0.106713	0.176597	0.200842	0.038432	0.212452	-0.287697	0.397703	-0.082148	-0.09875	-0.075089	0.45112	0.170247	-0.067061	0.018812	0.142979	0.400789	-0.063949	0.080106	0.462664	0.249905	-0.180691	0.351023	0.17125	0.139372	0.088551	0.077555	0.37846	0.360257	0.149856	-0.061412		15	5
RP11-53L13	5	32742919	32916357	0.580778	0.869858	-0.154769	0.057194	0.274355	0.083066	-0.027937	0.179286	-0.530503	0.692809	0.00702	-0.059568	-0.066855	0.539416	-0.008929	-0.102004	0.082155	0.122394	0.479418	-0.021921	0.155115	0.432862	0.356508	-0.350559	0.395925	0.192307	0.029699	0.149606	0.18004	0.560569	0.507695	-0.007339	-0.0540283		15	5
RP11-15G6	5	33280769	33452491	0.620145	0.836826	-0.178894	0.017282	0.237572	-0.035071	0.011007	0.259673	-0.135045	0.596636	0.095668	0.146002	-0.049156	0.52886	0.080617	-0.10594	0.112677	0.041518	0.413264	-0.106352	0.197229	0.468142	0.267078	-0.468503	0.463373	0.171252	-0.002439	0.05354	0.156167	0.617261	0.641662	0.080934	-0.145988		15	4
CTD-2052F19	5	34929543	35043272	0.678164	0.88096	-0.123623	0.087895	0.231148	0.265267	0.075004	0.30209	0.155292	0.583492	0.084695	0.160792	-0.068049	0.559768	-0.169438	-0.150715	0.099297	0.316621	0.413363	-0.022657	0.275683	0.446451	0.452947	-0.285783	0.404909	0.143826	0.108102	0.176346	0.094529	0.562129	0.745742	0.043433	0.078983		15	4
CTD-2291F22	5	35388192	35513594	0.561407	0.761858	-0.208952	0.027725	0.273947	0.363432	-0.094503	0.330484	0.394243	0.479121	0.057713	0.092361	-0.16767	0.32905	0.076257	-0.120117	0.0046	0.124785	0.86328	-0.035724	0.216953	0.363247	0.28362	-0.528986	0.350532	0.175455	-0.055082	0.104326	0.157377	0.482985	0.765783	0.0650481	-0.331862		15	4
CTD-2267H19	5	36275837	36380871	0.478037	0.493072	-0.10051	-0.001519	0.195163	0.329952	-0.015237	0.385235	0.3124	0.466626	-0.002318	0.173547	-0.043638	0.432635	0.111134	-0.1115	0.03123	0.085267	0.930761	-0.057282	0.173025	0.434695	0.324008	-0.182755	0.290891	0.207613	0.084375	0.027675	0.092737	0.435162	0.833118	0.083528	-0.149546		15	4
RP11-7M4	5	36988555	37177051	0.446823	0.397703	-0.043513	-0.031682	0.248316	0.246827	0.067997	0.274493	0.073849	0.328011	0.015616	0.088697	-0.054032	0.551334	0.010658	-0.031764	0.08784	0.063486	0.938088	-0.047547	0.032208	0.39808	0.333339	-0.1343	0.231964	0.192753	0.0274368	0.101463	0.112263	0.395819	0.447901	-0.0118	0.032617		15	4
CTD-2007F2	5	38200569	38306406	0.47444	0.323187	-0.292255	-0.113282	0.185068	0.266116	-0.168635	0.59525	0.114291	0.303144	-0.043564	0.062737	-0.193321	0.373608	-0.07681	-0.200137	-0.023548	-0.014607	1.01967	-0.006018	0.154538	0.39466	0.281333	-0.501511	0.304857	0.093662	-0.063531	0.021844	0.172231	0.476689	0.796181	-0.012043	-0.231236		15	4
RP11-15A14	5	39226026	39422569	0.60584	0.634614	-0.168331	0.055847	0.240609	0.508543	-0.014459	0.819545	1.14926	0.282445	0.022646	0.033702	0.050505	0.516003	0.084685	-0.074249	0.143924	0.072844	1.17222	-0.097213	0.280919	0.553895	0.37409	-0.275364	0.412746	0.239245	0.149408	0.08618	0.176234	0.583415	0.538415	-0.003547	-0.253554		15	4
RP11-17J3	5	40113135	40281760	0.609792	0.128187	-0.215061	-0.020131	0.197003	0.108143	-0.099783	0.732564	0.872124	0.194045	0.021831	0.190201	-0.051807	0.379817	0.044515	-0.06807	0.077394	0.011488	1.07818	-0.01775	0.185821	0.400918	0.3284	-0.273286	0.166173	0.123119	0.123911	0.083777	0.189002	0.506284	0.389829	0.12332	-0.135831		15	4
RP11-274J22	5	41662376	41829385	0.635028	0.206105	-0.176028	0.026496	0.202414	0.071488	-0.074198	0.445311	0.758804	0.123065	0.122976	0.0782921	-0.214546	0.640079	-0.102006	-0.067339	0.014127	-0.026215	1.20849	-0.039789	0.01894	0.481279	0.452995	-0.442291	-0.037639	0.126733	-0.00224456	0.057244	0.127579	0.582112	0.501924	-0.02968	-0.309157		14	4
RP11-575G10	5	42897645	42898147	0.554093	0.357672	-0.103937	0.0545586	0.320104	0.46115	-0.0125477	0.408733	0.457131	0.309012	-0.037111	0.151846	0.344279	0.542087	-0.003205	-0.134178	0.075775	0.079837	1.0888	-0.046847	0.080624	0.524815	0.268156	-0.321038	-0.00342	0.226356	0.014394	0.21465	0.226908	0.580974	0.390398	0.177703	-0.158359		14	3
RP11-28I9	5	45570686	45708327	0.614962	-0.000599	-0.232203	-0.016387	0.011843	-0.019345	0.020368	0.578757	0.067761	0.121823	-0.01294	0.17876	-0.244498	0.504018	0.046063	-0.146851	0.133982	-0.155449	0.929421	-0.055051	0.025903	0.864837	0.052258	0.116886	0.042119	0.31048	0.051227	0.095397	0.011325	0.205137	0.361455	0.084676	-0.185503		14	3
RP11-269M20	5	49907775	50093939	-0.017379	0.636481	1.37815	0.031534	0.169503	0.260416	0.225869	0.290492	-0.171311	0.247643	0.426678	0.205003	0.236403	0.700317	-0.062389	-0.144932	0.263284	0.078226	0.913536	-0.179833	-0.030104	0.423162	0.289657	-0.195827	0.045061	0.144734	-0.055966	0.266681	-0.025662	0.244883	-0.017075	0.018782	0.0790789		13	3
CTD-2276O24	5	50061472	50168170	-0.298721	0.090139	1.70823	-0.005042	0.144382	-0.195027	0.073694	0.334546	-0.028476	0.105987	0.427423	0.247676	-0.093187	0.405809	0.069737	-0.061821	0.248589	0.090963	0.620598	-0.071608	-0.09004	0.421567	-0.015217	-0.403452	0.040679	0.172309	-0.145366	0.054425	-0.021315	0.200091	-0.19356	-0.400073	-0.127996		13	7
RP4-592P18	5	51083837	51232444	-0.357738	0.1228	1.57838	-0.09483	0.249395	-0.104614	-0.112278	0.363819	0.046344	0.175421	0.55036	0.279746	-0.105031	0.235877	0.100586	-0.182151	-0.025621	-0.069486	0.776088	-0.016077	-0.025661	0.244723	0.030523	-0.461576	0.028095	0.071246	-0.063805	-0.034597	0.043267	0.215449	-0.18045	-0.208595	0.0743208		13	7
RP11-92M7	5	52909243	53065347	-0.144453	0.185672	1.79473	-0.023891	0.28039	-0.142152	0.098068	0.416814	0.147478	0.088838	0.484646	0.311036	-0.074303	0.532241	0.136688	-0.038187	0.208174	0.067073	0.750822	-0.137318	-0.167169	0.387157	0.070511	-0.277922	-0.00701	0.135473	0.007299	0.114633	0.102901	0.301736	-0.082247	-0.314074	0.302493		13	7
RP11-506H20	5	54562681	54764084	-0.164622	0.16243	1.67548	-0.158095	0.251456	-0.047589	-0.005717	0.284317	0.050854	0.290766	0.583256	0.211822	0.047628	0.443998	0.135298	-0.148472	0.016392	0.023304	0.818951	-0.022407	-0.011106	0.372821	0.114264	-0.458984	0.002689	0.06137	-0.0471549	0.160093	0.072316	0.199002	-0.153023	-0.202245	0.192054		13	7
RP11-364C6	5	55408349	55408851	-0.311206	0.248175	1.71033	-0.038933	0.216815	-0.076276	0.012268	-0.001872	0.045429	0.27204	0.548298	0.096476	0.294386	0.45343	-0.002562	-0.137754	0.082008	0.188542	0.865549	-0.052943	-0.054275	0.313609	0.076344	-0.37089	-0.199519	0.18287	0.100942	0.174501	0.164164	0.130404	-0.092641	-0.437698	0.103309		12	7
RP11-412L4	5	55546666	55547446	-0.470014	-0.084855	1.45096	-0.314885	0.110518	0.027103	-0.309685	-0.145765	0.124079	0.200467	0.582371	-0.00435663	0.126231	0.32059	-0.070392	-0.1706	-0.138981	-0.300217	0.917682	-0.042507	-0.142085	0.09629	-0.096042	-0.639669	-0.237301	0.014648	-0.349305	0.055029	0.187326	0.027541	-0.202519	-0.386841	0.100559		12	7
RP4-572A3	5	56921507	57065064	-0.2942	-0.071397	1.50634	-0.228797	0.26996	-0.139947	-0.155571	0.007261	-0.024209	0.130047	0.593212	0.124409	0.001478	0.387159	0.045984	-0.116471	-0.070649	0.035443	0.769777	-0.027603	-0.010763	0.168292	-0.052799	-0.675454	-0.210252	0.01147	0.067374	-0.016108	0.196054	0.021594	-0.233443	-0.541371	0.089423		12	7
RP11-495K20	5	58128952	58280997	-0.269373	0.065671	1.50394	-0.19796	0.223659	-0.023	-0.110824	0.097983	0.005531	0.185687	0.69498	0.08105	-0.100147	-0.073586	-0.152787	-0.207866	-0.07464	0.040897	0.86431	-0.051315	-0.078369	0.231018	0.058811	-0.521548	-0.075977	0.0096709	-0.030763	0.099139	0.141461	0.093338	-0.144068	-0.375766	0.154213		12	7
RP11-16B11	5	59340905	59341702	-0.191606	0.250136	1.4681	0.030402	0.135903	-0.04438	0.104412	-0.143495	0.103635	0.177434	0.453204	0.221286	-0.105595	0.139705	0.06707	-0.084466	0.203885	-0.078522	0.837	-0.171797	-0.143267	0.474047	0.118834	-0.338876	-0.121381	0.172883	-0.009057	0.099374	-0.017128	0.210023	-0.202386	-0.547591	0.055712		12	7
RP11-210O14	5	60203778	60204237	-0.211981	0.343019	1.36009	0.031864	0.287379	-0.0486139	0.15548	-0.158059	0.030508	0.31898	0.538573	0.203961	0.060191	0.103219	0.159132	-0.023793	0.170003	0.300018	0.713942	-0.211978	-0.147978	0.378095	0.009855	-0.255079	-0.14586	0.158077	-0.180738	0.052958	-0.002072	0.280344	-0.139391	-0.330167	0.0743208		12	7
RP11-313P15	5	60735461	60897709	-0.275197	0.183982	0.104417	-0.072966	0.190603	-0.088865	0.024656	-0.252519	0.180697	0.175845	0.565779	0.114077	0.05517	0.080693	0.057122	-0.103114	0.177193	0.020606	0.73487	-0.137381	-0.092088	0.390657	-0.027981	-0.411223	-0.071825	0.122535	0.077254	-0.030992	-0.065263	0.197232	-0.14721	-0.449753	0.110548		11	7
[truncated: 2,004 more rows]
